# Supplementary material for: A model of twenty-three metabolic-related genes predicting overall survival for lung adenocarcinoma
Source: PeerJ. 2020 Sep 24;8:e10008. doi: 10.7717/peerj.10008 (PMC7520091; doi:10.7717/peerj.10008)
Supplement: Supplemental Information 2 [file peerj-08-10008-s002.xls]

Id	futime	fustat	age	gender	grade	stage	T	M	N
TCGA-J2-8192	739	0	65	FEMALE	unknow	Stage IIA	T2a	MX	N1
TCGA-91-8499	36	0	76	FEMALE	unknow	Stage IA	T1b	MX	N0
TCGA-53-7624	1043	1	40	FEMALE	unknow	Stage IV	T2	M1	N0
TCGA-55-6986	3261	0	74	FEMALE	unknow	Stage IB	T2	M0	N0
TCGA-38-4632	1357	1	42	MALE	unknow	Stage IV	T2	M1	N1
TCGA-78-7146	173	1	71	FEMALE	unknow	Stage IIIA	T2	M0	N2
TCGA-NJ-A4YG	1904	0	65	MALE	unknow	Stage IB	T2	M0	N0
TCGA-86-8279	482	0	46	MALE	unknow	Stage IIA	T2a	M0	N1
TCGA-50-6591	119	1	63	FEMALE	unknow	Stage IV	T2	M1	N0
TCGA-50-5939	460	1	85	MALE	unknow	Stage IB	T2	M0	N0
TCGA-62-8402	1498	1	73	FEMALE	unknow	Stage IIIA	T2	M0	N2
TCGA-49-4506	999	1	68	FEMALE	unknow	Stage IIB	T2	M0	N1
TCGA-91-6847	842	0	62	FEMALE	unknow	Stage IB	T2	MX	N0
TCGA-73-4659	711	1	66	MALE	unknow	Stage IIIA	T2	M0	N2
TCGA-55-A48Y	630	0	69	MALE	unknow	Stage IIA	T2b	M0	N0
TCGA-50-5049	2146	0	70	MALE	unknow	Stage IA	T2	M0	N0
TCGA-44-3396	411	0	74	FEMALE	unknow	Stage IIIA	T2	M0	N2
TCGA-05-4405	610	0	74	FEMALE	unknow	Stage IB	T2	M0	N0
TCGA-78-8662	3361	1	53	FEMALE	unknow	Stage IB	T2	M0	N0
TCGA-50-8460	829	0	74	MALE	unknow	Stage IA	T1a	M0	N0
TCGA-55-8087	462	0	59	FEMALE	unknow	Stage IB	T2a	MX	N0
TCGA-MP-A4TA	950	1	75	FEMALE	unknow	Stage IA	T1	M0	N0
TCGA-55-7815	773	0	76	MALE	unknow	Stage IB	T2a	MX	N0
TCGA-55-8096	719	1	67	FEMALE	unknow	Stage IB	T2a	MX	N0
TCGA-NJ-A55R	603	0	67	MALE	unknow	Stage IA	T1b	MX	N0
TCGA-91-7771	492	0	62	MALE	unknow	Stage IIB	T3	MX	N0
TCGA-69-7760	202	0	73	MALE	unknow	Stage IIB	T3	M0	N0
TCGA-44-5644	498	0	51	FEMALE	unknow	Stage IB	T2a	unknow	N0
TCGA-69-7973	230	0	42	FEMALE	unknow	Stage IB	T2a	M0	N0
TCGA-44-6145	328	0	62	FEMALE	unknow	Stage IA	T1	M0	N0
TCGA-64-1676	1728	0	58	MALE	unknow	Stage IA	T1a	M0	N0
TCGA-97-7553	1870	0	58	FEMALE	unknow	Stage IA	T1	MX	N0
TCGA-55-8511	552	0	73	FEMALE	unknow	Stage IB	T2a	MX	N0
TCGA-MP-A4TF	336	1	58	FEMALE	unknow	Stage IIA	T2b	M0	N0
TCGA-55-8204	515	0	87	FEMALE	unknow	Stage IB	T2a	MX	N0
TCGA-55-8616	48	0	58	FEMALE	unknow	Stage IB	T2a	M0	N0
TCGA-86-8281	0	0	75	MALE	unknow	Stage IA	T1	M0	NX
TCGA-55-7574	995	1	64	FEMALE	unknow	Stage IB	T2a	M0	N0
TCGA-L9-A743	664	0	56	MALE	unknow	Stage IIA	T2a	M0	N1
TCGA-73-4670	131	0	69	FEMALE	unknow	Stage IV	T2	M1	N0
TCGA-50-5066	944	0	72	MALE	unknow	Stage IB	T2	M0	N0
TCGA-75-5126		0	unknow	FEMALE	unknow	Stage IIIA	T3	M0	N2
TCGA-55-6543	435	0	60	FEMALE	unknow	Stage IA	T1b	MX	N0
TCGA-55-A48Z	651	0	60	FEMALE	unknow	Stage IIIB	T1a	MX	N3
TCGA-L4-A4E5	578	0	48	FEMALE	unknow	Stage I	T1	M0	N0
TCGA-49-4505	428	1	61	FEMALE	unknow	Stage IIB	T2	M0	N1
TCGA-69-7980	411	0	70	FEMALE	unknow	Stage I	T1b	M0	N0
TCGA-55-7725	442	0	68	FEMALE	unknow	Stage IA	T1a	MX	N0
TCGA-78-7162	3169	1	75	MALE	unknow	Stage IA	T1	M0	N0
TCGA-80-5608		0	unknow	FEMALE	unknow	Stage IA	T1	M0	N0
TCGA-78-7159	1221	0	60	FEMALE	unknow	Stage IA	T1	M0	NX
TCGA-MP-A4TI	429	1	72	MALE	unknow	Stage IIA	T2a	M0	N1
TCGA-78-7542	321	1	56	MALE	unknow	Stage IB	T2	M0	N0
TCGA-91-6836	417	0	52	FEMALE	unknow	Stage IB	T2	MX	N0
TCGA-78-7537	1622	1	72	MALE	unknow	Stage IB	T2	M0	N0
TCGA-78-8660	321	1	69	MALE	unknow	Stage IIB	T2	M0	N1
TCGA-49-AARQ	6732	0	41	FEMALE	unknow	Stage I	T2	MX	N0
TCGA-05-4415	91	1	57	MALE	unknow	Stage IIIB	T4	M0	N2
TCGA-86-A4JF	536	0	56	MALE	unknow	Stage IIB	T3	M0	N0
TCGA-86-7701	474	0	66	MALE	unknow	Stage IV	T2	M1	N0
TCGA-44-3918	197	0	60	FEMALE	unknow	Stage IA	T1	M0	N0
TCGA-50-6597	1268	1	79	FEMALE	unknow	Stage IB	T2	M0	N0
TCGA-86-8280	701	0	54	FEMALE	unknow	Stage IIA	T2b	M0	N0
TCGA-44-2666	97	1	43	MALE	unknow	Stage IB	T2	M0	N0
TCGA-78-7154	593	1	72	MALE	unknow	Stage IIIA	T3	M0	N2
TCGA-55-A491	626	0	81	FEMALE	unknow	Stage IA	T1b	MX	N0
TCGA-05-4390	1126	0	58	FEMALE	unknow	Stage IB	T2	M0	N0
TCGA-05-4382	607	0	68	MALE	unknow	Stage IB	T2	M0	N0
TCGA-55-8206	888	0	56	MALE	unknow	Stage IA	T1b	M0	N0
TCGA-55-7576	670	0	54	MALE	unknow	Stage IB	T2a	M0	N0
TCGA-55-8506	11	0	62	FEMALE	unknow	Stage IIB	T3	MX	N0
TCGA-50-5930	282	1	47	MALE	unknow	Stage IIIA	T2	M0	N2
TCGA-05-4403	578	0	76	MALE	unknow	Stage IB	T2	M0	N0
TCGA-55-7911	537	0	70	FEMALE	unknow	Stage IA	T1a	MX	N0
TCGA-78-7143	4961	1	62	FEMALE	unknow	Stage IB	T2	M0	N0
TCGA-62-A46P	594	1	65	MALE	unknow	Stage IB	T2	M0	N0
TCGA-95-8494	84	0	67	MALE	unknow	Stage IIA	T2a	M0	N1
TCGA-35-5375	264	0	61	MALE	unknow	Stage IIIA	T2	M0	N2
TCGA-78-7163	6812	0	60	MALE	unknow	Stage IB	T2	M0	N0
TCGA-05-4417	455	0	51	FEMALE	unknow	Stage IB	T2	M0	N0
TCGA-91-6828	323	0	70	MALE	unknow	Stage IA	T1a	M0	N0
TCGA-44-A47A	466	0	78	FEMALE	unknow	Stage IB	T2a	MX	N0
TCGA-L9-A443	193	1	63	FEMALE	unknow	Stage IA	T1a	MX	N0
TCGA-86-A4D0	116	1	48	MALE	unknow	Stage IIA	T2b	M0	N0
TCGA-44-A479	392	0	73	FEMALE	unknow	Stage IB	T2	MX	N0
TCGA-97-A4LX	614	0	81	MALE	unknow	Stage IB	T2a	M0	N0
TCGA-49-4486	2318	1	72	MALE	unknow	Stage IA	T1	M0	N0
TCGA-50-5932	1235	1	75	MALE	unknow	Stage IIB	T2	M0	N1
TCGA-86-8073	740	0	58	MALE	unknow	Stage IB	T2a	M0	N0
TCGA-55-A494	481	0	61	FEMALE	unknow	Stage IB	T2a	MX	N0
TCGA-69-7765	165	0	56	MALE	unknow	unknow	T4	MX	N0
TCGA-86-8672	19	1	59	MALE	unknow	Stage IIB	T3	M0	N0
TCGA-49-4488	869	1	74	FEMALE	unknow	Stage IA	T1	MX	N0
TCGA-55-7903	567	0	64	MALE	unknow	Stage IA	T1b	MX	N0
TCGA-MP-A4T2	1136	1	71	MALE	unknow	Stage IA	T1	M0	N0
TCGA-49-4487	855	1	72	FEMALE	unknow	Stage IA	T1	M0	N0
TCGA-99-8033	656	1	74	FEMALE	unknow	Stage IV	TX	M1	NX
TCGA-50-5068	1499	1	59	FEMALE	unknow	Stage IIB	T2	MX	N1
TCGA-55-6978	176	1	81	MALE	unknow	Stage IIA	T2b	MX	N0
TCGA-91-A4BC	44	0	59	MALE	unknow	Stage IIA	T2b	MX	N0
TCGA-49-4490	385	1	45	FEMALE	unknow	Stage IIIA	T3	M0	N2
TCGA-86-7955	508	0	62	MALE	unknow	Stage IB	T2a	M0	N0
TCGA-05-4430	761	0	59	FEMALE	unknow	Stage IB	T2	M0	N0
TCGA-44-3398	253	0	77	FEMALE	unknow	Stage IA	T1b	M0	N0
TCGA-49-4507	268	1	73	FEMALE	unknow	Stage IIIA	T3	M0	N1
TCGA-97-A4M5	634	0	83	MALE	unknow	Stage IA	T1b	M0	N0
TCGA-49-6745	522	0	82	MALE	unknow	Stage IIIA	T2a	M0	N2
TCGA-86-8674	405	0	50	MALE	unknow	Stage IIA	T2a	M0	N1
TCGA-05-4384	426	0	66	MALE	unknow	Stage IIIA	T2	M0	N2
TCGA-78-7147	586	1	67	FEMALE	unknow	Stage IIB	T2	M0	N1
TCGA-93-7347	297	0	76	FEMALE	unknow	Stage IA	T1a	MX	N0
TCGA-49-4514	1700	0	79	FEMALE	unknow	Stage IA	T1	M0	N0
TCGA-MN-A4N1	827	0	60	MALE	unknow	Stage IIA	T2a	M0	N1
TCGA-J2-A4AD	550	1	61	FEMALE	unknow	Stage IA	T1a	MX	N0
TCGA-78-7160	678	0	61	MALE	unknow	Stage IV	T4	M1	N2
TCGA-05-4397	731	1	65	MALE	unknow	Stage IIB	T2	M0	N1
TCGA-91-8497	434	1	75	FEMALE	unknow	Stage IA	T1a	MX	N0
TCGA-55-7283	609	0	76	FEMALE	unknow	Stage IIIA	T3	MX	N2
TCGA-05-4244	0	0	70	MALE	unknow	Stage IV	T2	M1	N2
TCGA-91-6848	224	0	59	MALE	unknow	Stage IIIA	T2	MX	N2
TCGA-MP-A4TD	307	1	71	MALE	unknow	Stage IIIA	T2	M0	N2
TCGA-55-8620	375	1	60	MALE	unknow	Stage IV	T1a	M1b	N1
TCGA-97-7547	1965	0	67	FEMALE	unknow	Stage IB	T2	MX	N0
TCGA-44-6777	987	1	85	FEMALE	unknow	Stage IB	T2	MX	NX
TCGA-38-4629	864	1	68	MALE	unknow	Stage IIB	T3	M0	N0
TCGA-55-8097	476	0	60	FEMALE	unknow	Stage IA	T1a	MX	N0
TCGA-78-8648	1209	1	58	FEMALE	unknow	Stage IIB	T3	M0	N0
TCGA-75-5125		0	unknow	MALE	unknow	Stage IIB	T2	M0	N1
TCGA-95-7944	21	0	71	MALE	unknow	Stage IA	T1a	M0	N0
TCGA-44-6147	441	0	67	FEMALE	unknow	Stage IA	T1b	M0	NX
TCGA-55-7727	119	0	70	MALE	unknow	Stage IIIA	T1a	MX	N2
TCGA-95-7039	34	0	54	FEMALE	unknow	Stage IIB	T3	MX	N0
TCGA-55-6975	118	1	61	MALE	unknow	Stage IIB	T2	M0	N1
TCGA-05-4433	730	0	82	MALE	unknow	Stage IB	T2	M0	N0
TCGA-05-4427	791	0	65	FEMALE	unknow	Stage IIB	T2	M0	N1
TCGA-86-7711	630	0	70	MALE	unknow	Stage IIA	T2a	M0	N1
TCGA-44-2661	446	0	69	FEMALE	unknow	Stage IA	T1	M0	N0
TCGA-55-6981	1379	1	53	FEMALE	unknow	Stage IIIA	T1	M0	N2
TCGA-MP-A4TH	446	0	70	FEMALE	unknow	Stage IA	T1a	M0	N0
TCGA-55-8299	469	1	61	FEMALE	unknow	Stage IA	T1b	MX	N0
TCGA-L4-A4E6	435	0	67	MALE	unknow	Stage IA	T1	M0	N0
TCGA-44-A47F	337	0	74	MALE	unknow	Stage IIB	T2b	M0	N1
TCGA-55-7913	561	1	61	FEMALE	unknow	Stage IA	T1b	MX	N0
TCGA-38-4628	1492	1	65	FEMALE	unknow	Stage IIB	T2	M0	N1
TCGA-67-6215	174	0	52	FEMALE	unknow	Stage IB	T2a	M0	N0
TCGA-NJ-A7XG	617	0	49	MALE	unknow	Stage IIIA	T4	M0	N1
TCGA-67-3772	573	0	82	FEMALE	unknow	Stage IB	T2	M0	N0
TCGA-S2-AA1A	513	0	68	FEMALE	unknow	Stage IA	T1b	M0	N0
TCGA-49-6767	677	0	46	FEMALE	unknow	Stage IIB	T3	MX	N0
TCGA-55-6980	2109	0	56	MALE	unknow	Stage IA	T1	M0	N0
TCGA-44-6144	407	0	58	MALE	unknow	Stage IA	T1a	M0	N0
TCGA-44-5645	383	0	61	FEMALE	unknow	Stage IA	T1	unknow	NX
TCGA-MP-A4T7	167	1	75	FEMALE	unknow	Stage IV	T2	M1	N0
TCGA-62-A46V	2199	0	78	FEMALE	unknow	Stage IB	T2	M0	N0
TCGA-44-6774	361	0	56	FEMALE	unknow	Stage IIIA	T1	M0	N2
TCGA-55-8621	515	0	75	FEMALE	unknow	Stage IA	T1a	MX	N0
TCGA-05-4396	303	1	76	MALE	unknow	Stage IIIB	T4	M0	N1
TCGA-55-7573	487	0	72	FEMALE	unknow	Stage IA	T1b	MX	N0
TCGA-49-AARR	4992	0	68	MALE	unknow	Stage IA	T1	MX	N0
TCGA-97-A4M3	540	0	69	FEMALE	unknow	Stage IA	T1b	M0	N0
TCGA-49-AARO	3759	0	39	FEMALE	unknow	Stage IA	T1a	MX	N0
TCGA-91-6830	60	0	65	FEMALE	unknow	Stage IIA	T1	MX	N1
TCGA-38-6178	448	0	70	FEMALE	unknow	Stage IIIA	T2b	unknow	N2
TCGA-55-8091	600	0	74	MALE	unknow	Stage IB	T2	MX	N0
TCGA-55-8507	418	0	53	MALE	unknow	Stage IA	T1a	MX	N0
TCGA-75-7030		0	unknow	MALE	unknow	Stage IIB	T3	M0	N0
TCGA-86-A456	405	0	78	FEMALE	unknow	Stage IA	T1a	M0	N0
TCGA-55-A492	596	0	70	FEMALE	unknow	Stage IA	T1a	MX	N0
TCGA-64-1678	1189	0	70	FEMALE	unknow	unknow	T2b	M0	N0
TCGA-62-8399	2696	0	62	MALE	unknow	Stage IIIA	T2	M0	N2
TCGA-55-6985	1233	0	58	FEMALE	unknow	Stage IB	T2	MX	N0
TCGA-44-8120	260	0	58	MALE	unknow	Stage IB	T2a	M0	N0
TCGA-50-5935	653	1	86	FEMALE	unknow	Stage IA	T1	M0	N0
TCGA-50-5044	624	1	72	FEMALE	unknow	Stage IIIB	T4	M0	N1
TCGA-55-8085	904	0	64	MALE	unknow	Stage IA	T1b	M0	N0
TCGA-L9-A444	307	0	60	FEMALE	unknow	Stage IA	T1a	MX	N0
TCGA-55-8615	446	0	67	MALE	unknow	Stage IIIA	T3	MX	N2
TCGA-97-A4M0	652	0	60	FEMALE	unknow	Stage IB	T2a	M0	N0
TCGA-95-7562	87	1	71	MALE	unknow	Stage IIA	T2a	M0	N1
TCGA-38-4626	2595	0	57	FEMALE	unknow	unknow	T2b	M0	N0
TCGA-67-6216	141	0	57	FEMALE	unknow	Stage IA	T1a	M0	N0
TCGA-75-6203		0	unknow	FEMALE	unknow	Stage IIIA	T2	M0	N2
TCGA-67-3773	427	0	84	FEMALE	unknow	Stage IB	T2	M0	N0
TCGA-78-7161	215	0	69	FEMALE	unknow	Stage IIB	T3	M0	N0
TCGA-NJ-A4YQ	886	0	69	FEMALE	unknow	Stage IA	T1b	M0	N0
TCGA-50-5072	250	1	74	MALE	unknow	Stage IIIA	T2	M0	N2
TCGA-50-5931	434	1	75	FEMALE	unknow	Stage IB	T2	M0	N0
TCGA-49-AARN	1135	1	56	FEMALE	unknow	Stage IA	T1	MX	N0
TCGA-64-1681	1167	1	61	FEMALE	unknow	Stage IA	T1	M0	N0
TCGA-99-7458	392	0	74	FEMALE	unknow	Stage IIIA	T4	M0	N0
TCGA-35-4122	225	0	69	MALE	unknow	Stage IA	T1	M0	N0
TCGA-44-7672	418	0	52	FEMALE	unknow	Stage IA	T1b	M0	N0
TCGA-44-7662	218	0	61	MALE	unknow	Stage IB	T2a	MX	N0
TCGA-86-7714	625	1	61	FEMALE	unknow	Stage IIIA	T1b	M0	N2
TCGA-97-7552	1932	0	70	MALE	unknow	Stage IB	T2	MX	N0
TCGA-44-5643	417	0	53	MALE	unknow	Stage IIIA	T2b	M0	N2
TCGA-75-7025		0	unknow	MALE	unknow	Stage IB	T2	M0	N0
TCGA-78-8655	2360	0	77	FEMALE	unknow	Stage IA	T1	M0	N0
TCGA-97-7937	564	0	65	MALE	unknow	Stage IB	T2a	MX	N0
TCGA-64-1679	1686	0	58	FEMALE	unknow	Stage IIIA	T1	M0	N2
TCGA-86-A4P8	431	0	59	FEMALE	unknow	Stage IIIA	T1b	MX	N2
TCGA-55-8205	599	0	76	FEMALE	unknow	Stage IIA	T2b	M0	N0
TCGA-44-2668	246	0	51	MALE	unknow	Stage IB	T2	M0	N0
TCGA-NJ-A4YP	50	0	52	MALE	unknow	Stage IB	T2a	M0	N0
TCGA-49-4494	1081	1	77	MALE	unknow	Stage IIIA	T3	M0	N2
TCGA-49-AAR9	260	1	61	MALE	unknow	Stage IIB	T3	MX	N0
TCGA-38-4625	2973	0	66	FEMALE	unknow	Stage IB	T2a	M0	N0
TCGA-44-7661	366	0	69	FEMALE	unknow	Stage IB	T2a	M0	N0
TCGA-55-7726	652	0	72	FEMALE	unknow	Stage IA	T1b	MX	N0
TCGA-75-6205		1	unknow	FEMALE	unknow	Stage IB	T2a	M0	N0
TCGA-55-6972	1632	1	72	MALE	unknow	Stage IB	T2	M0	N0
TCGA-86-8359	444	1	52	MALE	unknow	Stage IIIA	T3	M0	N2
TCGA-50-6673	22	1	84	FEMALE	unknow	Stage I	T1	M0	N0
TCGA-44-3917	392	0	33	FEMALE	unknow	Stage IB	T2	M0	N0
TCGA-95-7567	163	0	61	MALE	unknow	Stage IIB	T2b	M0	N1
TCGA-64-1677	628	1	77	FEMALE	unknow	Stage IIIA	T2	M0	N2
TCGA-50-5942	883	0	67	FEMALE	unknow	Stage IA	T1	M0	N0
TCGA-38-4627	1147	1	64	FEMALE	unknow	Stage IIA	T1b	M0	N1
TCGA-86-8055	124	1	79	MALE	unknow	Stage IIA	T2a	M0	N1
TCGA-55-A4DF	440	1	88	MALE	unknow	Stage IA	T1b	MX	N0
TCGA-44-2664	383	0	66	FEMALE	unknow	Stage IA	T1	M0	N0
TCGA-44-A47B	287	0	79	MALE	unknow	Stage IB	T2a	M0	N0
TCGA-62-A46R	1725	1	54	FEMALE	unknow	Stage IB	T2	M0	N0
TCGA-71-8520	210	1	60	FEMALE	unknow	Stage IB	T2	M0	N0
TCGA-80-5611		0	unknow	MALE	unknow	Stage IB	T2	M0	N0
TCGA-05-4250	121	1	79	FEMALE	unknow	Stage IIIA	T3	M0	N1
TCGA-78-7158	179	1	59	FEMALE	unknow	Stage IIIB	T4	M0	N2
TCGA-53-7813	424	0	51	FEMALE	unknow	Stage IIIB	T4	M0	N0
TCGA-55-6970	464	1	67	FEMALE	unknow	Stage IIIA	T2	MX	N2
TCGA-73-A9RS	340	1	41	MALE	unknow	Stage IIB	T3	M0	N0
TCGA-69-7764	414	0	75	MALE	unknow	Stage IA	T1b	M0	N0
TCGA-55-8094	541	0	51	MALE	unknow	Stage IV	T2b	M1b	N0
TCGA-95-A4VN	553	0	62	FEMALE	unknow	Stage IIA	T2a	M0	N1
TCGA-69-8254	409	0	85	MALE	unknow	unknow	T2b	unknow	unknow
TCGA-49-AAR3	1893	0	69	MALE	unknow	Stage IIB	T2	MX	N1
TCGA-49-4510	896	1	51	FEMALE	unknow	Stage IIB	T2	M0	N1
TCGA-55-7281	872	0	70	FEMALE	unknow	Stage IA	T1b	M0	N0
TCGA-69-7763	690	0	69	MALE	unknow	Stage IA	T1b	M0	N0
TCGA-78-7148	626	1	71	MALE	unknow	Stage IIB	T2	M0	N1
TCGA-97-A4M7	629	0	74	MALE	unknow	Stage IA	T1b	M0	N0
TCGA-86-8668	423	0	61	FEMALE	unknow	Stage IA	T1b	M0	N0
TCGA-49-AAQV	677	1	63	FEMALE	unknow	Stage II	T1	MX	N1
TCGA-71-6725	256	0	48	FEMALE	unknow	Stage IB	T2	M0	N0
TCGA-55-7570	824	0	60	MALE	unknow	Stage IA	T1a	MX	N0
TCGA-05-4402	244	1	57	FEMALE	unknow	Stage IV	T2	M1	NX
TCGA-67-4679	448	0	69	MALE	unknow	unknow	T3	M0	N0
TCGA-05-4422	365	0	68	MALE	unknow	Stage IB	T2	M0	N0
TCGA-55-7227	952	1	77	MALE	unknow	Stage IIIA	T3	MX	N1
TCGA-55-1594	1178	0	68	MALE	unknow	Stage IIIA	T2	M0	N2
TCGA-49-AAR4	879	1	51	MALE	unknow	Stage IIIA	T2	MX	N2
TCGA-62-A46Y	414	1	70	FEMALE	unknow	Stage IIIA	T2	M0	N2
TCGA-62-A46S	1653	1	73	MALE	unknow	Stage IB	T2	M0	N0
TCGA-97-8177	499	0	59	FEMALE	unknow	Stage IB	T2a	M0	N0
TCGA-05-5425	882	0	68	MALE	unknow	Stage IIB	T2b	M0	N1
TCGA-49-6744	890	0	64	FEMALE	unknow	Stage IIA	T2a	MX	N1
TCGA-44-6778	1110	0	59	MALE	unknow	Stage IA	T1	MX	N0
TCGA-75-6206		0	unknow	MALE	unknow	Stage IB	T2	M0	N0
TCGA-80-5607		0	unknow	FEMALE	unknow	Stage IIB	T2	M0	N1
TCGA-NJ-A4YF	2161	0	50	FEMALE	unknow	Stage IA	T1	M0	N0
TCGA-78-7220	807	1	53	FEMALE	unknow	Stage IIIA	T2	M0	N2
TCGA-50-6595	189	1	74	FEMALE	unknow	Stage IIIA	T2	M0	N2
TCGA-78-7167	2681	1	77	MALE	unknow	Stage IV	T2	M1	N0
TCGA-95-7948	133	0	42	FEMALE	unknow	Stage IB	T2a	M0	N0
TCGA-75-6207		1	unknow	MALE	unknow	Stage IIIA	T2	M0	N2
TCGA-05-4389	1369	0	70	MALE	unknow	Stage IA	T1	M0	N0
TCGA-05-5429	275	1	60	MALE	unknow	Stage IIIA	T3	M0	N2
TCGA-55-7907	343	1	77	MALE	unknow	Stage IIA	T2a	MX	N1
TCGA-67-3776	61	0	57	FEMALE	unknow	Stage IIB	T2	M0	N1
TCGA-73-4677	38	1	74	MALE	unknow	unknow	T2a	M0	N0
TCGA-75-5147		0	unknow	FEMALE	unknow	Stage IB	T2	M0	N0
TCGA-50-5045	2174	1	57	FEMALE	unknow	unknow	T2	M0	N1
TCGA-44-A4SU	409	1	67	FEMALE	unknow	Stage IA	T1a	MX	N0
TCGA-55-8301	534	0	58	MALE	unknow	Stage IB	T2a	MX	N0
TCGA-55-1596	2065	0	55	MALE	unknow	Stage IIB	T2	M0	N1
TCGA-55-A4DG	608	0	71	MALE	unknow	Stage IA	T1b	MX	N0
TCGA-49-AARE	1229	1	51	FEMALE	unknow	Stage IA	T1	MX	N0
TCGA-50-6592	777	1	71	FEMALE	unknow	Stage IB	T2	M0	N0
TCGA-J2-A4AG	500	0	66	FEMALE	unknow	Stage IA	T1b	MX	N0
TCGA-67-3771	610	0	77	FEMALE	unknow	Stage IA	T1	M0	N0
TCGA-73-4662	912	0	65	FEMALE	unknow	Stage IA	T1	M0	N0
TCGA-05-5420	457	0	67	MALE	unknow	Stage IIIA	T2	M0	N2
TCGA-86-8056	139	0	63	FEMALE	unknow	Stage IIIA	T4	M0	N0
TCGA-J2-A4AE	671	0	77	FEMALE	unknow	Stage IA	T1a	MX	N0
TCGA-44-7669	574	1	59	MALE	unknow	Stage IIA	T1b	MX	N1
TCGA-44-8119	285	0	73	MALE	unknow	Stage IIB	T3	M0	N0
TCGA-50-5941	567	0	55	FEMALE	unknow	Stage IIIA	T2a	M0	N2
TCGA-64-5781	1202	0	55	FEMALE	unknow	Stage IB	T2	M0	N0
TCGA-73-4666	800	0	52	FEMALE	unknow	Stage IV	T1	M1	N0
TCGA-L9-A8F4	476	0	64	FEMALE	unknow	Stage IB	T2a	MX	N0
TCGA-69-8253	426	0	59	FEMALE	unknow	Stage IIA	T1a	MX	N1
TCGA-97-8552	626	0	55	FEMALE	unknow	Stage I	T1a	MX	N0
TCGA-44-6776	1938	0	60	FEMALE	unknow	Stage IA	T1	MX	N0
TCGA-L9-A5IP	58	1	40	FEMALE	unknow	Stage IV	T3	M1b	N2
TCGA-38-4630	1073	1	75	FEMALE	unknow	Stage IB	T2	M0	N0
TCGA-95-7947	40	0	67	MALE	unknow	Stage IA	T1a	M0	N0
TCGA-4B-A93V	254	0	52	FEMALE	unknow	Stage IA	T1b	M0	N0
TCGA-86-8076	489	0	42	MALE	unknow	Stage IA	T1	M0	N0
TCGA-05-4410	0	0	62	MALE	unknow	Stage IB	T2	M0	N0
TCGA-62-A472	910	0	70	MALE	unknow	Stage IIB	T3	M0	N0
TCGA-55-6968	1293	1	61	MALE	unknow	Stage IV	T1	M1	N0
TCGA-55-8514	520	0	70	FEMALE	unknow	Stage IB	T2a	MX	N0
TCGA-75-7031		0	unknow	FEMALE	unknow	Stage IB	T2	M0	N0
TCGA-62-8397	1289	0	70	FEMALE	unknow	Stage IIB	T3	M0	N0
TCGA-86-7953	591	0	69	FEMALE	unknow	Stage IA	T1b	M0	N0
TCGA-75-5146		0	unknow	MALE	unknow	Stage IB	T2	M0	N0
TCGA-44-A47G	351	0	73	FEMALE	unknow	Stage IA	T1	M0	N0
TCGA-86-8671	839	0	72	FEMALE	unknow	Stage IIB	T2b	M0	N1
TCGA-86-8358	653	0	44	MALE	unknow	Stage IB	T2a	M0	N0
TCGA-05-4432	761	0	66	MALE	unknow	Stage IIB	T2	M0	N1
TCGA-86-8669	938	0	64	MALE	unknow	Stage IA	T1b	M0	N0
TCGA-95-A4VK	651	0	74	FEMALE	unknow	Stage IIIA	T2b	M0	N2
TCGA-44-7670	531	0	47	FEMALE	unknow	Stage IIA	T1b	M0	N1
TCGA-73-7499	715	0	81	FEMALE	unknow	Stage IB	T2a	M0	N0
TCGA-62-A46U	2067	0	71	FEMALE	unknow	Stage IIB	T2	M0	N1
TCGA-44-2657	400	0	74	FEMALE	unknow	Stage IB	T2	M0	NX
TCGA-97-8171	568	0	81	MALE	unknow	Stage IV	T2a	M1a	N2
TCGA-78-7633	994	0	67	MALE	unknow	Stage IB	T2	M0	N0
TCGA-64-5775	62	1	71	MALE	unknow	Stage IIIA	T4	M0	N0
TCGA-J2-8194	724	0	69	FEMALE	unknow	Stage IIB	T3	MX	N0
TCGA-78-7539	327	0	75	FEMALE	unknow	Stage IIA	T2b	M0	N0
TCGA-91-6829	1258	1	78	MALE	unknow	Stage IB	T2	MX	N0
TCGA-99-8028	1118	0	50	FEMALE	unknow	Stage IA	T1a	M0	N0
TCGA-78-7153	760	0	65	FEMALE	unknow	Stage IB	T2	M0	N0
TCGA-L9-A50W	442	1	75	MALE	unknow	Stage IIA	T1b	MX	N1
TCGA-50-6594	370	1	79	FEMALE	unknow	Stage IIIA	T3	M0	N2
TCGA-05-5428	670	0	57	MALE	unknow	Stage IIA	T1b	M0	N1
TCGA-55-5899	930	0	58	MALE	unknow	unknow	T1a	M0	N1
TCGA-44-7659	444	0	70	MALE	unknow	Stage IA	T1b	MX	N0
TCGA-55-7816	468	1	49	FEMALE	unknow	Stage IV	TX	MX	NX
TCGA-05-4425	669	0	70	FEMALE	unknow	Stage IV	T2	M1	N0
TCGA-44-2665	400	0	55	FEMALE	unknow	Stage IIB	T2	M0	N1
TCGA-05-4424	913	0	70	MALE	unknow	Stage IIB	T3	M0	N0
TCGA-78-7156	976	1	62	MALE	unknow	Stage IV	T4	M1	N1
TCGA-49-4512	905	1	69	FEMALE	unknow	Stage IIIA	T2	MX	N2
TCGA-78-7536	244	1	69	MALE	unknow	Stage IIIA	T2	M0	N2
TCGA-97-8175	551	0	55	FEMALE	unknow	Stage IB	T2a	M0	N0
TCGA-49-4501	1421	1	67	FEMALE	unknow	Stage IB	T2	M0	N0
TCGA-53-7626	929	1	76	FEMALE	unknow	Stage IIA	T1	M0	N1
TCGA-55-6984	760	1	71	FEMALE	unknow	Stage IIB	T2	M0	N1
TCGA-44-2659	529	0	65	FEMALE	unknow	Stage IIB	T1	M0	N1
TCGA-MP-A4SW	1778	1	53	MALE	unknow	Stage IIB	T2	M0	N1
TCGA-55-A48X	689	0	63	FEMALE	unknow	Stage IIA	T1b	M0	N1
TCGA-55-1592	701	1	65	MALE	unknow	Stage IA	T2	M0	N0
TCGA-86-8673	455	0	61	MALE	unknow	Stage IB	T2	M0	N0
TCGA-35-4123	182	0	38	MALE	unknow	Stage IA	T1	M0	N0
TCGA-78-8640	6528	0	59	MALE	unknow	Stage IIA	T1	M0	N1
TCGA-75-7027		0	unknow	MALE	unknow	Stage IB	T2	M0	N0
TCGA-99-8032	44	0	61	MALE	unknow	Stage IA	T1a	M0	N0
TCGA-49-6761	354	0	68	FEMALE	unknow	Stage IIIA	T1	MX	N2
TCGA-MP-A4SY	1501	1	61	MALE	unknow	Stage IIB	T2	M0	N1
TCGA-55-A490	99	1	78	MALE	unknow	Stage IIA	T2b	MX	N0
TCGA-93-7348	127	0	75	FEMALE	unknow	Stage IA	T1a	MX	N0
TCGA-49-AAR0	4655	0	57	MALE	unknow	Stage IA	T1	MX	N0
TCGA-93-A4JP	578	0	64	MALE	unknow	Stage IV	TX	M1b	NX
TCGA-55-6979	237	1	59	FEMALE	unknow	Stage IIB	T2	M0	N1
TCGA-73-7498	1189	0	58	FEMALE	unknow	Stage IA	T1b	M0	N0
TCGA-MP-A4T8	161	1	68	MALE	unknow	Stage IIIA	T2	M0	N2
TCGA-50-6590	1288	1	72	FEMALE	unknow	Stage IB	T2	M0	N0
TCGA-64-5815	224	0	74	MALE	unknow	Stage IIB	T2	M0	N1
TCGA-78-7540	881	0	66	FEMALE	unknow	Stage IB	T2	M0	N0
TCGA-55-8510	539	0	55	FEMALE	unknow	Stage IB	T2a	MX	N0
TCGA-44-7671	535	0	64	MALE	unknow	Stage IB	T2a	M0	N0
TCGA-91-8496	505	0	63	FEMALE	unknow	Stage IB	T2a	MX	NX
TCGA-55-8089	702	1	56	MALE	unknow	Stage IA	T1a	M0	N0
TCGA-99-AA5R	658	0	70	FEMALE	unknow	Stage IA	T1a	M0	N0
TCGA-55-8505	440	0	62	MALE	unknow	Stage IIIA	T1a	MX	N2
TCGA-05-5423	151	0	65	MALE	unknow	Stage IIB	T2	M0	N1
TCGA-55-8614	536	0	76	MALE	unknow	Stage IB	T2a	MX	N0
TCGA-50-5946	686	0	62	MALE	unknow	Stage IA	T1	MX	N0
TCGA-05-4245	730	0	81	MALE	unknow	Stage IIIA	T2	M0	N2
TCGA-91-A4BD	603	0	78	MALE	unknow	Stage IIA	T1b	MX	N1
TCGA-55-8512	607	1	41	MALE	unknow	Stage IV	T1a	M1b	N1
TCGA-05-4434	457	1	67	FEMALE	unknow	Stage IV	T4	M1	N1
TCGA-97-A4M6	568	0	45	FEMALE	unknow	Stage IA	T1a	M0	N0
TCGA-86-7954	605	0	68	FEMALE	unknow	Stage IB	T2	M0	N0
TCGA-78-7150	666	1	59	MALE	unknow	Stage IIB	T2	M0	N1
TCGA-69-8255	129	0	71	MALE	unknow	Stage IA	T1a	M0	N0
TCGA-55-8208	674	0	73	FEMALE	unknow	Stage IA	T1b	M0	N0
TCGA-50-5051	478	1	42	FEMALE	unknow	Stage IIIA	T2	M0	N2
TCGA-55-7910	1040	0	50	FEMALE	unknow	Stage IIA	T2b	M0	N0
TCGA-38-7271	800	1	72	FEMALE	unknow	Stage IA	T1	M0	N0
TCGA-86-8585	353	0	57	MALE	unknow	Stage IB	T2a	M0	N0
TCGA-86-8075	479	0	66	FEMALE	unknow	Stage IB	T2	M0	N0
TCGA-73-4676	164	0	45	MALE	unknow	Stage IIA	T2a	M0	N1
TCGA-50-5933	2393	1	72	MALE	unknow	Stage IIIB	T4	M0	N2
TCGA-73-4675	40	0	59	MALE	unknow	Stage IIIA	T3	M0	N1
TCGA-55-6987	2137	0	77	MALE	unknow	Stage IA	T1	M0	N0
TCGA-50-5055	1830	1	79	FEMALE	unknow	Stage IIA	T1	M0	N1
TCGA-MN-A4N5	84	0	63	MALE	unknow	Stage IA	T1a	M0	N0
TCGA-55-6971	1400	0	59	FEMALE	unknow	Stage IB	T2	MX	N0
TCGA-69-7974	184	0	54	FEMALE	unknow	Stage IIIA	T2a	MX	N2
TCGA-44-6779	500	1	50	FEMALE	unknow	Stage IIB	T2	MX	N1
TCGA-MP-A4TC	74	1	77	MALE	unknow	Stage IIIA	T1	M0	N2
TCGA-55-8302	478	0	54	MALE	unknow	Stage IB	T2	MX	N0
TCGA-67-3774	385	0	73	FEMALE	unknow	Stage IB	T2	M0	N0
TCGA-55-A493	28	0	54	FEMALE	unknow	Stage IB	T2a	M0	N0
TCGA-50-7109	308	1	60	MALE	unknow	Stage IA	T1	M0	N0
TCGA-55-6982	995	1	79	FEMALE	unknow	Stage IIB	T2	M0	N1
TCGA-86-8074	24	0	62	FEMALE	unknow	Stage IIA	T1b	M0	N1
TCGA-69-A59K	591	0	60	FEMALE	unknow	Stage IIB	T3	M0	N0
TCGA-55-8090	598	1	80	MALE	unknow	Stage IA	T1a	M0	N0
TCGA-97-A4M2	624	0	66	MALE	unknow	Stage IA	T1a	M0	N0
TCGA-MP-A4T9	1265	1	54	FEMALE	unknow	Stage IIIA	T2	MX	N2
TCGA-MP-A4TK	582	1	56	FEMALE	unknow	Stage IIB	T2	MX	N1
TCGA-91-6849	35	0	75	FEMALE	unknow	Stage IIIA	T2	MX	N2
TCGA-50-6593	336	1	49	FEMALE	unknow	Stage IIIA	T1	M0	N2
TCGA-95-7043	2	0	63	FEMALE	unknow	Stage IA	T1a	MX	N0
TCGA-55-7724	705	0	76	FEMALE	unknow	Stage IB	T2a	MX	N0
TCGA-44-7667	557	0	49	FEMALE	unknow	Stage IIB	T3	MX	N0
TCGA-44-8117	385	0	54	FEMALE	unknow	Stage IB	T2a	M0	N0
TCGA-MP-A5C7	1862	0	76	FEMALE	unknow	Stage IB	T2	M0	N0
TCGA-75-6214		0	unknow	FEMALE	unknow	Stage IIIA	T2	M0	N2
TCGA-86-7713	422	0	70	MALE	unknow	Stage IIA	T2b	M0	N0
TCGA-75-6212		0	unknow	FEMALE	unknow	Stage IIB	T2	M0	N1
TCGA-62-8394	139	1	65	FEMALE	unknow	Stage IIIB	T4	M0	N2
TCGA-64-5778	926	0	60	MALE	unknow	Stage IB	T2	M0	N0
TCGA-97-8174	164	1	67	MALE	unknow	Stage IIA	T2b	M0	N0
TCGA-50-8457	779	0	63	FEMALE	unknow	Stage IA	T1a	M0	N0
TCGA-97-A4M1	601	0	52	FEMALE	unknow	Stage IA	T1a	M0	N0
TCGA-78-7166	258	1	84	MALE	unknow	Stage IIB	T2	M0	N1
TCGA-83-5908	824	0	59	FEMALE	unknow	Stage IA	T1	M0	N0
TCGA-05-4426	791	0	71	MALE	unknow	Stage IB	T2	M0	N0
TCGA-55-7995	889	0	73	FEMALE	unknow	Stage IA	T1b	M0	N0
TCGA-93-8067	186	0	77	MALE	unknow	Stage IB	T2a	MX	N0
TCGA-55-7284	243	1	74	MALE	unknow	Stage IIB	T3	MX	N0
TCGA-55-1595	1479	0	74	FEMALE	unknow	Stage IA	T1	M0	N0
TCGA-44-2655	575	0	65	FEMALE	unknow	Stage IA	T1	M0	N0
TCGA-91-6835	79	0	81	FEMALE	unknow	Stage IA	T1	M0	N0
TCGA-97-7938	18	1	76	FEMALE	unknow	Stage IA	T1a	MX	N0
TCGA-69-7978	134	0	59	MALE	unknow	Stage IIB	T2b	MX	N1
TCGA-55-7994	603	0	81	MALE	unknow	Stage IIB	T3	MX	N0
TCGA-78-7149	1093	0	71	MALE	unknow	Stage IIIB	T4	M0	N0
TCGA-38-4631	354	1	72	FEMALE	unknow	Stage IB	T2	M0	N0
TCGA-44-2662	480	0	65	MALE	unknow	Stage IB	T2	M0	N0
TCGA-MP-A4SV	2620	1	67	MALE	unknow	Stage IB	T2	M0	N0
TCGA-L9-A7SV	565	0	69	MALE	unknow	Stage IIA	T2a	M0	N1
TCGA-35-3615	14	0	57	MALE	unknow	Stage IB	T2	M0	N0
TCGA-05-4418	274	1	69	MALE	unknow	Stage IIIA	T3	M0	N2
TCGA-05-4249	1523	0	67	MALE	unknow	Stage IB	T2	M0	N0
TCGA-MN-A4N4	1175	0	57	MALE	unknow	Stage IA	T1b	M0	N0
TCGA-73-4658	1600	1	80	FEMALE	unknow	Stage IB	T2	M0	N0
TCGA-44-A4SS	415	0	73	MALE	unknow	Stage IA	T1b	M0	N0
TCGA-55-7914	187	1	71	FEMALE	unknow	Stage IIA	T1b	MX	N1
TCGA-78-7145	826	1	52	FEMALE	unknow	Stage IV	T4	M1	N1
TCGA-55-8092	154	1	75	MALE	unknow	Stage IIB	T3	MX	N0
TCGA-MP-A4TE	896	1	56	MALE	unknow	Stage IIA	T2b	MX	N0
TCGA-MP-A4T4	2617	1	68	FEMALE	unknow	Stage IIB	T2	M0	N1
TCGA-55-8203	547	0	69	FEMALE	unknow	Stage IA	T1b	M0	N0
TCGA-55-6712	171	1	71	MALE	unknow	Stage IIA	T2a	MX	N1
TCGA-49-6743	369	0	81	FEMALE	unknow	Stage IIIA	T1	MX	N2
TCGA-73-4668	467	0	66	FEMALE	unknow	Stage IIB	T2	M0	N1
TCGA-67-3770	610	0	70	FEMALE	unknow	Stage IA	T1	M0	N0
TCGA-64-1680	1126	0	63	MALE	unknow	Stage IV	T2a	M1	N2
TCGA-05-4398	1431	0	47	FEMALE	unknow	Stage IIIB	T4	M0	N3
TCGA-78-7155	1171	1	68	MALE	unknow	Stage IB	T2	M0	N0
TCGA-78-7152	1202	0	65	MALE	unknow	Stage IB	T2	M0	N0
TCGA-75-6211		1	unknow	FEMALE	unknow	Stage IB	T2	M0	N0
TCGA-MP-A4T6	1790	1	76	FEMALE	unknow	Stage IIIA	T1	MX	N2
TCGA-55-A57B	546	0	80	FEMALE	unknow	Stage IA	T1b	M0	N0
TCGA-44-2656	582	0	59	MALE	unknow	Stage IB	T2	M0	N0
TCGA-93-A4JO	33	1	70	MALE	unknow	Stage IA	T1a	MX	N0
TCGA-78-7535	949	1	45	MALE	unknow	Stage IB	T2	M0	N0
TCGA-62-8398	444	1	55	MALE	unknow	Stage IIIA	T2	M0	N2
TCGA-91-6840	372	0	59	FEMALE	unknow	Stage IA	T1b	M0	N0
TCGA-75-5122		1	unknow	MALE	unknow	Stage IB	T2	M0	N0
TCGA-99-8025	1060	0	72	FEMALE	unknow	Stage IIIA	T3	M0	N2
TCGA-55-6969	1239	0	52	MALE	unknow	Stage IB	T2	M0	N0
TCGA-64-5774	2550	0	60	MALE	unknow	Stage IB	T2	M0	N0
TCGA-O1-A52J	1798	1	74	FEMALE	unknow	Stage IA	T1	MX	N0
TCGA-86-6851	179	0	73	FEMALE	unknow	Stage IIA	T1b	M0	N1
TCGA-62-8395	1216	0	80	FEMALE	unknow	Stage IIB	T3	M0	N0
TCGA-86-A4P7	415	0	63	FEMALE	unknow	Stage IB	T2a	M0	N0
TCGA-91-6831	310	0	66	MALE	unknow	Stage IB	T2	MX	N0
TCGA-05-4420	912	0	41	MALE	unknow	Stage IB	T2	M0	N0
TCGA-05-4395	0	1	76	MALE	unknow	Stage IIIB	T4	M0	N2
TCGA-67-6217	422	0	73	FEMALE	unknow	Stage IIA	T2a	M0	N1
TCGA-44-4112	370	0	60	FEMALE	unknow	Stage IB	T2a	M0	N0
TCGA-62-A46O	1454	1	65	FEMALE	unknow	Stage IB	T2	M0	N0
TCGA-44-7660	325	0	72	MALE	unknow	Stage IB	T2	MX	N0
TCGA-44-3919	190	0	71	FEMALE	unknow	Stage IA	T1	M0	N0
TCGA-44-6775	370	0	72	FEMALE	unknow	Stage IB	T2a	MX	N0
TCGA-97-7554	775	0	83	FEMALE	unknow	Stage IIIA	T2a	M0	N2
TCGA-86-6562	376	1	52	MALE	unknow	Stage IIA	T2a	M0	N1
TCGA-55-6642	2449	0	63	MALE	unknow	Stage IB	T2	MX	N0
TCGA-62-A471	1246	0	64	MALE	unknow	Stage IIB	T2b	M0	N1
TCGA-05-5715	62	0	69	FEMALE	unknow	Stage IB	T2a	M0	N0
