# Supplementary material for: A model of twenty-three metabolic-related genes predicting overall survival for lung adenocarcinoma
Source: PeerJ. 2020 Sep 24;8:e10008. doi: 10.7717/peerj.10008 (PMC7520091; doi:10.7717/peerj.10008)
Supplement: Supplemental Information 3 [file peerj-08-10008-s003.xlsx]

## Sheet: Sheet1
ID	GSM748053	GSM748054	GSM748055	GSM748056	GSM748057	GSM748058	GSM748059	GSM748060	GSM748061	GSM748062	GSM748063	GSM748064	GSM748065	GSM748066	GSM748067	GSM748068	GSM748069	GSM748070	GSM748071	GSM748072	GSM748073	GSM748074	GSM748075	GSM748076	GSM748077	GSM748078	GSM748079	GSM748080	GSM748081	GSM748083	GSM748084	GSM748085	GSM748086	GSM748087	GSM748088	GSM748089	GSM748090	GSM748091	GSM748092	GSM748093	GSM748094	GSM748095	GSM748096	GSM748097	GSM748098	GSM748099	GSM748100	GSM748101	GSM748102
PDE8A	6.47104	4.87944	3.8536	3.40584	4.4127	3.89535	0.952896	3.6481	4.03756	3.49396	3.85996	8.33541	4.23748	1.41599	4.64707	5.25408	2.61431	3.66118	5.25343	3.57981	2.75777	3.19904	3.09815	5.00749	4.76755	6.7322	3.82085	4.13464	3.58642	6.87177	4.92524	4.96751	7.09185	5.63548	3.79728	2.99656	2.87186	2.53978	4.20546	1.77251	3.45024	3.32942	4.43805	4.99274	2.00924	3.30126	3.78575	3.36384	5.50288
ASNS	5.55155	1.45392	4.73208	8.38605	9.07227	2.2488	11.2176	1.2826	4.7636	3.14229	8.56535	3.2152	6.38517	7.68826	13.3239	11.0372	7.29393	1.3915	-0.863095	7.81386	3.70916	3.29977	5.65374	10.2576	1.82267	2.72907	4.17228	3.07692	5.13139	0.0520384	3.53538	1.83691	1.72902	3.6402	5.68188	5.58826	3.70824	8.87648	3.83445	12.2891	2.4771	8.03595	8.22906	8.9645	11.7536	3.28812	8.53722	4.3225	5.34758
PFKM	3.43588	4.70247	2.54264	3.73681	5.95814	4.37957	6.59503	4.72096	3.75715	6.13296	5.6067	5.91738	6.75339	3.34574	6.12123	6.22497	2.31932	3.99489	3.13239	3.21745	4.68753	5.49149	4.17069	6.64977	5.73835	4.50208	2.92732	4.34697	4.14886	4.53438	4.98814	5.2451	1.92018	3.79419	7.6614	4.24663	6.72861	4.38258	3.0545	5.78144	2.57492	6.01801	5.40617	7.08236	7.78805	3.82526	0.697209	4.28699	3.37294
BPNT1	11.9898	12.7381	13.5982	9.17065	14.5643	11.1134	12.5906	7.92388	11.1379	8.79149	6.98952	19.0466	8.34177	9.85206	10.4863	11.7343	8.54609	7.50684	12.6219	8.50693	9.98249	8.21879	10.1828	10.9156	13.1169	9.54045	11.0316	11.5296	10.3177	13.5467	10.8904	14.2338	14.6456	8.78039	10.9133	11.8049	15.6822	16.8512	12.4081	7.07015	11.2422	8.88041	5.14126	11.2227	11.1912	10.7606	11.9335	10.1446	7.9236
ALOX5	16.6019	14.4569	13.1002	13.7277	7.6075	20.8732	6.15353	24.0731	3.88353	2.64838	8.42433	16.8995	11.657	18.7959	10.2134	14.1107	15.7405	26.4941	20.6226	11.5834	16.4926	14.1195	20.922	8.93569	15.1461	17.3784	20.878	18.7271	14.4246	19.2687	15.4161	14.9102	14.139	20.7284	14.938	23.0466	19.5071	18.3044	15.6022	15.7714	23.689	11.542	11.0576	3.8785	4.05955	22.9183	12.3431	20.4824	12.7385
ACOT12	0.712383	0.716091	0.653706	0.76874	0.603199	0.631693	0.647149	0.676484	0.689999	0.686621	0.76386	0.622915	1.01584	0.774815	0.661709	0.70606	0.73974	0.682915	0.672293	0.732401	0.653298	0.650836	0.570179	0.676605	0.679032	0.627993	0.720315	0.739154	0.672728	0.777891	0.6372	0.604049	0.687372	0.61537	0.671941	0.726171	0.676361	0.790437	0.658304	0.799224	0.680059	0.671085	0.689972	0.669412	0.618701	0.722898	0.745356	0.687415	0.776881
CYP2A7	0.601957	0.150157	0.696155	0.435496	5.18428	1.54583	-0.140095	1.32029	-0.588978	0.767533	-0.362882	0.394173	-0.216351	1.72361	1.11632	0.477122	1.21693	0.460686	0.106843	1.26912	0.801905	0.89684	0.918118	0.434528	0.799157	0.214922	0.225648	0.302732	1.57298	0.483109	1.79385	0.180583	0.138787	2.11929	0.468485	-0.127842	1.12326	5.80468	-0.145826	1.22235	0.968876	0.193706	-0.0227864	0.258329	-0.199145	1.55938	1.7875	0.486785	1.23848
PDE1A	3.02078	2.34961	1.58087	2.05932	3.54763	1.66808	1.04003	1.81776	0.588609	0.481407	0.857976	1.7204	1.6891	0.877402	1.07853	1.33429	1.94781	1.97357	2.34869	1.22793	2.18313	1.79558	2.11748	1.45594	2.32952	2.07202	2.79213	2.34184	0.603546	1.65054	2.3233	2.12432	0.850557	2.92183	1.2528	2.73786	1.97406	1.85452	1.00433	1.59251	1.52981	1.22274	1.26115	0.536778	0.658721	1.73578	1.05972	2.74471	2.61146
GUCY1A2	2.85869	3.23711	2.18005	2.32764	2.51641	3.48469	0.0154562	3.1955	0.341172	1.17467	1.19063	2.95497	1.84981	1.34423	0.282704	0.254734	1.57948	3.43327	3.13502	2.55147	0.601455	1.4824	1.01421	2.54704	1.90303	2.50516	2.69434	2.80257	0.797906	4.066	3.08694	3.8037	1.71377	2.32603	1.24113	1.46006	2.55186	0.918826	0.28327	1.67546	2.31657	1.06576	2.70319	1.61707	0.652391	4.19187	1.28114	1.43679	1.52307
ITPKA	1.08213	22.7658	4.70618	2.26644	5.7183	3.0756	2.09997	-0.309472	3.51581	3.7574	6.20301	2.03176	10.0262	4.19576	2.94025	3.17525	7.01023	1.09405	31.4988	4.519	6.51201	5.97869	20.0707	7.61641	3.90977	2.89032	-1.29968	3.04094	5.14384	16.1092	5.06711	2.24924	2.96294	0.688435	4.40232	6.23747	6.82219	4.22368	2.30557	7.80928	18.5871	0.807652	4.59976	7.46072	9.81987	-0.406302	3.58382	9.32842	7.95789
SARDH	1.46543	1.0689	1.3	2.28718	2.94157	1.14129	0.789768	0.47715	1.84989	1.71633	0.566307	1.32205	2.27322	2.91991	1.60593	1.33773	2.02964	1.53852	1.39256	0.641237	1.89899	1.44328	1.56813	1.67925	0.558043	1.38347	2.2101	1.62561	1.61868	0.819777	2.09643	1.35219	0.519067	1.57212	1.1787	2.51926	1.15734	1.18849	1.64608	1.20647	1.31324	1.0864	1.5404	1.92857	1.96585	0.729757	1.66594	1.39769	2.33087
CP	50.2202	39.7779	49.9009	57.1376	53.9989	49.4175	44.9632	32.156	13.8031	14.2247	36.7156	55.4381	42.1546	37.4919	15.1855	50.4966	43.161	15.6314	28.665	38.8117	55.6861	32.796	34.1822	31.8983	55.0299	52.7529	48.8017	56.1041	59.1836	49.6248	33.1798	46.6853	45.6752	58.0758	37.722	47.1356	52.1301	61.0556	55.2328	30.9615	56.5857	41.4114	43.9737	26.4077	22.4436	54.9982	62.6032	47.7638	58.9032
HAAO	1.73888	1.45867	2.03111	2.14531	3.32383	1.07716	1.94655	2.15167	1.44497	1.50007	1.02704	1.72845	2.499	1.83844	1.38767	1.26936	2.14997	2.68938	1.8665	2.73918	2.06323	2.1593	2.28028	1.413	2.6782	2.7679	2.41076	1.67359	2.70389	3.09647	2.01334	2.29161	2.72133	1.18764	1.71171	2.91975	3.23876	2.83163	2.18923	2.66759	2.38285	1.61047	1.57877	1.49606	1.2134	2.15562	2.91624	2.17441	2.23532
PIK3CD	5.39058	6.22717	4.56645	6.43265	2.80883	6.39753	4.70725	5.35666	6.27726	2.79342	3.41654	5.6397	5.62491	5.52819	5.03476	6.34094	7.16447	6.30521	6.33442	4.38036	6.62016	4.19107	7.46861	4.63222	6.16614	8.10889	8.29026	6.47931	3.30642	6.66986	5.49064	4.25622	2.72716	6.1022	5.52114	8.51125	4.95213	2.85194	4.30632	3.9559	5.6749	3.82232	6.45253	1.5273	3.7989	4.77281	5.7644	7.23407	6.9657
FECH	5.45464	4.19934	8.18352	4.59313	7.70667	2.17152	7.2539	5.97365	1.50211	4.66085	4.96749	6.46856	6.18075	0.371546	9.81193	10.4209	2.44772	4.81338	5.94244	4.61026	3.08368	2.63973	3.99692	5.53841	6.8617	5.10314	4.88658	5.72719	7.89813	5.31319	4.22446	9.87844	2.38047	5.41541	4.92962	3.75599	11.9134	3.11865	7.0276	4.91033	3.55192	3.42551	3.00985	5.76121	6.31186	3.5559	2.36406	4.36459	3.81025
AMPD3	3.38979	3.12064	3.09552	3.7324	1.75256	3.13586	3.41499	2.52801	7.46687	3.72428	3.5313	3.55579	3.27951	4.21189	2.52845	4.57179	2.95471	2.39677	4.42323	3.64745	5.82486	4.38493	4.32889	1.27637	3.52707	4.57519	6.21017	4.35049	1.73722	4.32712	4.99459	3.39855	0.231224	3.92829	5.35388	4.66853	3.12474	3.94652	4.23426	3.60795	4.62514	4.87605	4.83144	2.15093	-2.86963	2.02815	4.75239	5.79413	3.58906
ALOX15B	41.5178	14.9074	34.425	17.7992	36.5819	29.0164	6.98649	25.9945	11.7035	24.2304	10.9182	26.8658	16.2491	17.5869	9.62652	9.98182	14.7213	26.6215	38.6147	13.1275	38.8934	10.4119	40.234	10.6384	20.7001	14.6344	18.174	17.1523	24.7961	12.7716	15.6782	32.6446	34.2357	41.6342	9.62803	24.2383	34.9618	13.8665	15.5953	13.9664	39.4869	22.2139	10.822	7.37505	10.0135	22.4021	20.0089	29.1422	26.1407
PIK3C2A	8.43938	7.95314	4.99494	6.86213	5.3742	6.92578	4.89609	8.62115	8.91729	3.75933	8.04428	6.32155	6.67197	6.82946	3.83079	4.71363	5.37889	8.47173	7.04217	8.95744	4.1101	1.54081	4.47944	7.85548	7.11059	6.49788	6.71817	6.85863	5.91891	7.02242	4.06787	5.66086	7.96728	7.48215	2.9289	4.65553	7.18606	7.28628	8.80077	5.44918	9.22597	6.33592	8.9354	5.95809	4.2769	7.72157	5.85986	5.94842	6.89089
LCT	0.947206	0.803059	3.20838	0.777607	0.943097	1.35118	0.640284	0.741758	0.827481	1.061	0.795351	2.76305	0.56372	0.823395	0.610858	0.89116	1.08954	0.809081	0.608686	0.869122	1.09716	0.900439	1.61322	0.613935	0.77005	2.72068	0.623915	1.13562	1.18201	0.479928	0.690712	0.947759	2.93399	0.91742	0.904839	0.749505	2.10977	0.88729	0.553475	0.642085	0.643202	0.584671	0.924123	0.745217	0.767341	0.777449	0.907077	1.22241	0.85247
RDH12	0.670333	0.59986	0.821867	0.91619	0.905044	0.836769	1.11812	0.780678	1.15614	1.84624	0.969382	0.707977	0.815216	0.765815	1.04897	0.847697	0.89077	0.768788	0.659266	0.819126	0.826661	0.838453	0.791099	0.929985	0.934529	0.821654	0.811199	0.781333	0.848124	0.741333	0.792466	0.797057	0.912744	0.718238	0.928187	0.806269	0.914568	0.831978	0.837191	0.931451	0.865934	0.964433	0.655415	1.53378	1.77857	0.83148	0.777445	0.804422	0.767769
CYB5R1	16.8041	11.502	16.7616	12.115	18.7858	14.8405	11.6753	13.5962	19.7184	14.7882	10.4949	14.896	11.5688	13.5439	11.7296	14.6186	12.9472	13.5339	14.8757	12.6912	18.0103	15.7019	15.4751	14.4207	15.1523	13.4048	13.0008	14.84	13.9849	16.7539	16.2016	16.2067	18.4243	18.4133	12.351	14.9964	16.4057	12.5738	11.9097	13.7163	14.7053	14.9758	11.1858	13.9863	12.6757	13.3179	10.3719	12.8509	11.8691
ADK	15.8289	16.7343	17.9208	12.2935	19.519	18.9731	15.8958	12.2085	21.3526	16.2691	11.9708	16.0991	11.826	21.5326	12.7048	21.0007	14.6052	11.363	12.9449	13.5282	14.8146	16.7948	12.4933	12.7802	11.0235	12.1042	11.6731	11.1009	8.97551	10.2372	11.638	18.0734	17.3791	17.2328	9.79335	17.8039	19.5047	11.9104	12.4765	10.8475	18.3058	12.5041	11.8875	12.7934	16.4562	9.54253	6.50745	14.6759	13.4408
GUCY2F	0.775652	0.797544	0.794528	0.808711	0.852713	0.7896	0.719765	0.742356	0.77004	0.738835	0.832596	0.876822	0.774646	0.811545	0.80667	0.805695	0.761179	0.729594	0.776262	0.771245	0.780505	0.807957	0.830323	0.791844	0.823056	0.789832	0.749669	0.877272	0.829874	0.752353	0.86925	0.829811	0.833268	0.745689	0.766458	0.838502	0.80197	0.786541	0.737442	0.764839	0.757483	0.837574	0.819442	0.893339	0.805946	0.759693	0.817037	0.831329	0.810011
GDA	0.332163	-0.0008305	0.44083	1.89013	0.0417932	0.259604	3.08245	-0.121025	3.41813	4.01922	1.74058	0.202562	1.57298	0.396798	2.26313	0.00226202	0.311536	0.120936	0.0788398	0.523329	0.440386	3.52033	0.183013	2.80553	1.66301	0.28547	0.258853	2.02574	1.00317	1.88764	1.17183	0.452076	0.174432	-0.164541	2.96217	0.177792	0.0668804	1.90818	0.103085	3.81221	-0.155216	1.6199	0.651027	4.60406	4.54819	1.47744	0.125781	0.438005	0.338999
ACSS1	8.2353	4.68784	4.91326	5.82613	7.95008	6.84621	3.62594	5.20744	2.78622	4.22951	6.17211	4.61924	5.00535	2.98759	6.42466	4.73148	4.80093	7.36875	5.94278	5.90358	5.77366	5.39727	5.81771	3.44011	5.0089	7.36158	4.85548	3.32457	5.13427	3.32034	3.58634	6.57875	7.85027	5.59536	5.298	4.71686	5.34985	6.10366	3.43947	6.68763	4.47103	4.38328	3.20146	7.30782	6.0541	6.09695	5.65384	5.86569	5.11022
GLYCTK	1.19732	1.26695	2.3636	2.18428	1.96414	2.3357	0.959039	2.43851	0.676812	2.28283	0.906731	1.76102	1.69894	1.88786	1.51522	1.86439	2.43595	1.9665	1.84772	1.78479	1.97041	1.70719	1.84186	1.92113	5.01818	1.39765	1.78344	1.56116	2.86242	2.06695	2.24541	2.73671	1.42202	2.05623	1.44639	1.73275	2.3948	1.3676	1.89713	1.04011	2.29997	0.885151	1.51451	2.18491	2.12736	0.783786	0.885091	2.36406	2.02349
ACP2	14.2397	12.712	11.6812	13.0073	9.12271	11.5393	11.4058	10.7906	6.03148	7.69915	11.4886	12.4409	14.403	11.7134	13.435	15.3567	12.0077	10.2305	12.8154	14.3348	13.5414	9.37664	13.6886	13.7994	17.1405	14.4933	17.6412	14.1462	14.9748	15.6061	14.0762	11.7243	9.91924	13.2341	11.5061	16.865	13.5559	14.9015	16.9949	11.8086	14.6192	13.4375	13.3643	7.02082	8.47185	9.78044	10.1947	14.1112	14.3546
CHST11	5.4276	5.1663	3.58386	7.83244	8.0975	5.03454	2.8229	7.01832	5.76432	3.81927	5.97412	4.16144	8.16549	12.589	5.77827	7.59152	9.3311	7.42403	5.55048	6.00058	7.27089	5.71012	10.5819	4.64117	7.74103	5.14542	11.3131	6.33296	3.10906	7.01993	10.171	5.90515	4.64659	4.68503	9.65922	11.3291	5.18196	6.69192	9.06864	8.1821	7.63021	6.4592	9.05907	-0.682484	1.64612	6.60589	7.7966	6.22367	9.41286
ALDH7A1	6.8233	5.25971	7.88802	4.03116	8.48578	8.15972	0.581034	6.82238	0.557844	1.65945	2.20129	8.38216	4.56893	8.30496	2.04816	7.22543	6.15843	6.42957	8.1349	3.10643	8.7648	2.79741	6.44648	2.92205	7.61254	7.50728	6.61941	5.47324	6.01781	6.72539	5.52347	7.77357	7.0908	6.53034	1.94101	6.16504	6.90257	2.03209	7.78855	3.62519	8.60197	1.84736	8.53148	7.49482	1.3456	7.21701	4.79366	6.11278	6.02735
ENPP2	10.839	12.0204	8.90724	13.8141	5.96133	10.6735	-4.5114	13.4234	1.31316	-0.707884	12.4116	7.73453	11.2231	6.7255	5.49807	11.7007	11.2697	15.901	14.069	15.2775	12.1671	8.38351	11.4383	7.26205	8.24568	9.56011	14.0769	10.0691	7.76042	14.5409	13.4449	10.7644	2.01378	7.28803	7.13512	14.0288	9.39984	5.94114	12.5727	10.0285	13.8802	9.92275	8.92089	-3.1428	2.09701	14.1461	3.51278	11.4743	11.7752
PTGES	13.6029	23.9549	18.4986	18.3711	24.0448	20.2127	19.1884	11.5669	27.2138	19.4518	13.3589	21.0258	27.8703	28.2874	12.4671	32.5375	13.4075	9.49241	20.0061	18.5501	21.5366	20.7488	18.481	9.35591	25.4049	20.9673	15.4634	15.4509	23.2024	25.1377	24.659	13.7185	16.3767	15.9498	26.4878	14.0094	12.521	26.3881	10.7639	12.3507	15.3374	20.6111	26.2668	21.0766	15.8779	10.4434	14.2525	14.8296	13.651
GSTM5	2.16294	1.9683	1.94625	2.03018	1.34823	2.60443	0.984923	3.37187	1.21216	1.42258	0.59874	1.98528	1.48912	0.779133	0.989061	0.728708	1.55686	3.03849	2.2472	0.990939	1.93523	1.53704	1.5057	1.06543	1.53885	2.07708	1.90392	1.31143	1.26555	2.11512	1.75436	1.46113	1.53852	1.99143	1.20963	1.76252	1.70537	1.25184	1.33785	1.231	0.988555	1.14264	1.40377	0.883913	0.953912	2.37585	1.5146	3.06288	1.65017
AK7	0.551192	0.0400133	2.15358	0.109229	2.24631	1.40426	4.26901	2.66718	2.14463	1.23344	0.338378	1.74874	4.18408	1.59481	1.20722	2.02497	1.3408	0.212789	-0.807078	1.63033	-0.257791	1.98499	-0.651492	-0.157418	1.46491	1.89837	-0.212392	2.22452	2.93078	1.77474	0.198669	1.33918	0.517371	-0.941486	0.527831	0.12659	3.06599	1.54392	2.51278	1.36257	0.855902	0.944068	0.491683	1.38641	0.32749	1.52152	0.954036	1.59985	1.06879
PMM2	3.91768	2.52241	4.01064	2.9681	2.25258	3.77449	3.69386	1.42755	4.64846	4.45424	3.00102	3.36583	3.42729	3.86422	4.09105	3.37176	6.69268	1.85034	3.03377	1.97381	2.46476	3.33614	2.02026	2.86552	4.30251	2.65183	3.15816	3.21291	3.76749	4.96919	3.86785	3.15268	0.981768	3.77629	3.33649	3.2308	3.26612	4.44759	2.17843	3.30143	2.22057	3.69443	3.79965	4.40568	3.70078	2.11641	2.82575	2.44873	4.80209
SPTLC2	10.1603	9.72114	6.99355	6.8704	3.39262	8.3057	10.1267	6.71492	8.11074	7.30813	9.60856	10.4723	7.743	8.76706	8.07821	8.2835	5.00315	6.09611	8.48018	8.10336	6.93472	8.70145	8.27463	6.70207	6.78593	7.42621	7.78721	7.91149	10.0296	7.73084	5.4486	8.10635	12.2838	9.64008	7.60823	6.97811	6.85807	8.99908	8.01975	12.5744	10.5987	15.3783	10.3102	12.3083	14.1394	7.5358	5.92227	6.99149	8.34218
CYP4F2	0.800046	0.799898	0.7585	0.918456	0.949713	0.775736	1.37129	0.782772	0.870594	0.899484	1.1941	0.809887	0.782876	0.859063	1.49395	0.839368	0.822317	0.800249	0.832571	1.17067	0.795444	0.877732	0.774859	0.884234	1.27149	0.785912	0.768786	0.864224	0.91271	0.867699	0.794401	0.890658	0.776085	0.747194	1.05545	0.8635	0.899693	1.01078	0.828603	0.980715	0.805484	0.797209	0.877358	1.17124	1.36078	0.749134	0.756138	0.734252	0.853779
POLR3G	0.957109	0.006951	1.49936	1.0854	2.00859	1.03739	3.03336	0.550249	3.82333	2.44027	1.27297	1.49843	1.48911	3.10781	2.35238	1.6753	3.50818	0.673618	0.674572	1.32146	1.10653	1.30792	1.18856	2.17175	1.49291	0.261932	1.53895	0.232457	0.659585	1.1018	2.06312	2.08681	0.854333	0.913721	1.20169	1.67236	1.56872	0.838332	3.07426	1.1758	1.30386	1.52482	1.41616	1.05572	1.60044	1.26332	0.983724	1.03732	1.82916
HEMK1	2.33197	1.88461	2.45603	2.26941	3.88655	2.60095	1.95505	2.5232	1.29742	1.18092	1.56245	2.50804	1.82843	1.86261	1.76063	1.88207	2.49867	2.42373	2.8501	1.4743	2.31211	1.44452	2.45247	1.32858	1.67699	3.17435	2.33664	1.66881	1.78805	1.81897	2.39506	3.17317	2.89492	2.87954	1.44744	2.46779	2.05532	1.95861	2.00816	1.78308	2.75088	1.75876	1.77015	1.73587	1.39506	2.02634	2.26217	2.72074	3.0684
CYP2F1	0.290579	0.008767	0.985908	1.71259	1.63629	0.695939	2.56516	3.10236	1.02934	1.26729	1.0458	1.14903	0.402224	0.577932	0.940142	0.492552	1.56461	0.761439	0.0953803	1.42327	1.67698	0.910907	1.28391	1.276	0.568051	1.23031	0.0151309	-0.0222813	1.07794	1.30087	0.573179	1.57369	0.805937	0.978297	0.814256	1.81138	2.00721	2.49723	1.57524	0.781418	1.7374	0.327915	0.405049	0.953559	1.0114	3.86389	1.34189	1.685	0.800077
CPT1A	4.42055	5.83556	4.08871	7.6115	6.52832	3.37613	14.781	8.59567	9.60031	7.37376	6.56551	5.76826	10.3548	3.27157	10.466	10.2177	4.76532	6.60068	6.71692	6.65312	4.20738	6.18012	3.40505	9.11106	11.6479	6.82229	6.83209	7.59261	7.25714	9.03205	6.59005	7.37871	5.01435	4.39784	6.65338	3.94901	9.32145	9.71303	7.8109	8.14976	6.10296	6.63353	11.4825	8.10224	11.6128	5.92592	5.11689	3.92789	5.30068
UROC1	0.818645	0.877225	0.85503	0.923823	0.878762	0.767701	0.790136	0.711065	0.828252	0.950205	0.913356	0.938901	1.02464	0.818727	0.836422	0.723439	0.845412	0.760229	0.755405	0.859989	0.967056	0.919127	0.707613	0.835526	0.876538	0.87708	0.808649	0.710767	0.834775	0.688764	0.781651	0.738486	0.830191	0.780903	0.826998	0.803262	0.71106	0.880057	0.758557	0.759582	0.783133	0.80331	0.823354	0.7406	0.707005	0.689834	0.771073	0.806616	0.87048
MGST3	6.93682	6.15167	8.95127	6.43996	9.26715	7.79552	7.3252	8.19429	8.58463	5.6703	7.40183	8.79877	7.84062	7.77482	8.53131	9.65404	7.36371	7.82222	7.1048	6.49403	7.22033	4.54284	7.16927	7.68309	6.88683	7.21317	7.07537	8.0333	5.99278	7.32662	6.61795	8.24036	9.16117	6.27718	6.09792	7.51587	8.77577	8.41638	7.41248	7.26518	7.82981	7.56783	6.59787	7.86019	6.42042	8.56755	5.7747	7.6245	7.00156
PDE6D	4.03196	6.59964	4.83199	4.2777	3.43266	3.42823	5.29895	2.88726	5.31201	4.3404	5.00344	5.39783	4.09636	5.2264	5.55221	4.14287	6.32928	3.17506	4.11171	4.81058	5.67441	5.64468	5.47034	4.13093	3.36087	3.5024	4.94437	4.44659	1.50786	3.50556	5.88722	4.26962	3.52242	1.64447	2.92266	5.50253	4.32532	3.27324	7.40258	4.31847	3.71061	3.98405	5.6173	4.31547	3.29424	4.00643	6.68501	4.05319	4.99117
AKR1A1	33.1836	28.9918	33.0428	29.2117	28.6242	32.5044	33.8997	28.3147	28.9946	21.7379	25.1333	28.3313	30.1698	27.3469	30.8562	30.909	29.1686	28.9602	27.6053	27.5391	28.6313	28.9532	29.8376	28.8543	31.5302	29.7989	32.5564	31.3402	24.5823	30.2497	29.3551	29.2705	26.3558	29.3989	26.9067	31.665	25.2906	27.9734	31.9006	28.6216	30.132	27.785	28.3093	21.2211	29.7363	28.7863	24.8296	30.2779	30.6875
PRIM1	0.618108	1.67122	3.54697	0.947473	1.11703	0.830471	4.8965	1.36209	2.87925	2.16946	4.7808	2.14413	6.2467	5.49453	4.3528	5.81478	3.74809	0.144174	-1.03438	3.32178	1.00751	2.60616	0.918797	4.88271	2.17946	1.33356	3.46003	2.27163	2.78106	-0.984761	2.4074	-0.273882	1.83308	-1.08643	4.95181	3.46093	1.35206	7.0433	6.9383	3.23141	-0.776232	4.87421	2.60869	3.44049	6.25826	-0.510237	2.37005	1.26006	1.8152
NMNAT2	-0.24053	10.9516	0.398172	0.918122	5.34079	1.09391	-0.536711	-0.294586	4.95747	1.98364	-0.569267	2.29509	-0.0583574	1.26111	-0.445316	8.87566	3.07294	-0.0785335	6.57631	-0.216798	0.659723	-0.0882216	9.06575	1.0592	0.576009	0.8843	7.57382	1.78841	6.74603	1.89504	0.138534	5.80732	7.71851	0.0632338	-0.496289	-0.329681	0.571277	-0.104728	-0.0481749	-0.156104	-0.0824964	-0.18288	0.641935	2.64032	-0.354115	-0.599319	0.219965	7.15068	-0.708606
ZNRD1	4.42779	4.88471	5.41756	3.29204	4.7025	2.7921	4.4508	2.2133	3.44817	3.62278	3.62997	4.26137	4.72888	3.69136	4.03972	4.75078	4.43997	3.18067	3.0425	4.54261	4.28447	4.28194	3.64975	4.66613	4.11528	3.70372	4.57663	3.84503	3.38341	4.91567	5.16695	4.67639	2.11764	2.19981	2.72819	4.45896	3.36564	3.28133	5.16763	3.49179	3.17701	2.73009	5.29638	5.2955	4.36385	2.4375	5.20657	4.09017	4.38007
EHHADH	1.31369	3.18039	2.89217	3.56769	1.48381	2.37388	6.07739	2.53717	4.91095	5.68627	7.16806	2.34061	3.67309	3.17838	5.16356	3.14878	1.46542	2.35002	2.12659	6.46613	1.89579	5.26105	2.5015	5.84661	2.16396	2.3355	2.43208	5.34878	4.54186	3.59297	2.3628	3.62514	2.16096	1.97732	4.33182	3.26807	3.256	3.2862	1.993	2.39688	2.9971	5.14208	1.91479	4.51722	3.98546	1.69291	3.62388	2.41598	2.08318
BDH1	1.40983	0.483097	2.87735	1.1454	3.2022	1.21012	4.74434	-0.0388517	5.04728	6.04569	3.30029	2.60492	4.09282	2.64526	3.52	2.22062	2.00841	0.75255	2.19192	2.97133	0.509626	4.45847	1.93153	4.45809	2.82122	0.926599	1.30532	1.78296	2.97668	1.32977	1.50597	1.6277	0.783787	1.03555	3.11522	-0.128429	1.77907	2.40825	1.41514	3.04506	1.19126	4.05446	0.280183	5.18712	4.71702	0.604476	0.47206	0.657707	0.549147
PDE10A	0.24685	0.716383	0.331607	1.09297	0.346643	0.195246	1.6188	0.526808	0.197391	1.22277	0.953613	0.435989	0.320674	0.418943	0.701837	0.533653	1.02661	0.784372	0.847511	0.441101	3.07873	1.05567	1.19583	2.36562	1.56064	0.761267	1.13689	2.12343	0.547839	1.25326	1.49703	0.137185	2.37193	0.269628	1.07391	0.808506	2.10585	0.394385	3.29443	1.56163	0.401266	0.399283	1.23889	0.838857	0.805131	0.56734	-0.0726857	0.943382	1.87677
OXCT1	5.75524	3.10643	8.35324	6.29118	-2.00425	2.08639	11.1405	3.21615	3.4066	8.17206	3.50397	5.66178	7.65619	6.67567	4.52368	0.219221	2.76195	2.62836	0.47836	7.79184	3.86825	6.02381	2.80027	10.8533	2.43082	1.45155	5.20754	6.13736	0.612973	2.87237	6.15811	-0.231175	3.01473	-4.2427	-1.39803	4.24106	-1.86489	12.447	5.61699	5.68319	-0.0667455	5.56818	9.53272	8.19385	3.6076	3.30283	-5.77384	2.08905	1.60107
CPS1	5.11284	10.0044	6.86026	7.2938	8.74969	7.52756	2.36877	6.61496	6.96043	23.8665	2.94131	5.37428	6.7745	7.12289	5.74894	6.10651	9.44552	9.14661	7.28873	5.30764	6.28553	4.0129	10.7827	33.1957	9.37361	8.2244	8.70367	48.0487	61.1317	28.758	17.2582	19.8509	3.01225	6.83363	6.68522	6.74171	62.2938	6.29176	14.4215	9.87913	3.77554	3.62271	9.10502	4.79938	2.14839	10.3712	5.3058	4.15654	43.5086
GALC	8.99089	5.00093	7.00712	4.78164	4.94706	6.10599	6.6215	8.91807	3.57833	6.66186	5.08972	7.45103	8.24295	2.31165	3.39824	7.36506	4.94723	6.48124	7.23587	3.36916	5.93681	2.20567	5.93049	6.60767	9.07563	4.44483	8.64456	8.63931	5.46538	6.62083	6.30097	4.91188	7.35931	5.67229	3.26589	6.7639	4.92531	5.60935	7.32853	4.96849	6.3885	6.96451	7.71565	-0.049509	4.16013	6.94266	3.07204	6.37258	7.79781
GNPDA1	8.64768	7.11137	12.5227	8.93355	10.2041	9.88431	9.09873	8.01365	9.66399	8.01948	14.4759	12.1482	12.0542	9.30735	12.5212	12.2669	9.64731	8.58927	8.43338	8.17393	12.5205	6.91862	11.4902	10.461	16.2685	10.44	10.027	7.91715	7.11038	9.30258	9.37944	8.08469	9.47101	9.13104	10.5229	11.2679	7.27754	8.95624	9.54676	12.5413	15.0646	9.06951	7.12416	10.8655	13.152	11.1415	11.0879	11.5298	10.4963
TBXAS1	5.77423	4.42965	4.4361	5.33418	4.89651	6.1824	0.776237	5.78566	0.571157	-0.00520471	3.11019	5.84463	5.50646	3.18594	3.07481	9.08459	5.63623	6.54638	7.41928	2.68052	6.53903	4.17727	6.61367	2.1862	6.64257	6.44914	8.1739	6.73146	7.4125	6.17523	7.07221	6.19008	3.36843	4.27538	3.09261	8.38593	6.47939	4.66314	5.74727	5.77868	6.74765	3.88779	4.4459	1.16931	1.36411	5.55032	7.52825	6.05914	6.82051
POLR2C	17.4316	13.7399	17.9071	15.843	15.8411	20.3931	16.465	15.7621	15.2241	15.7924	14.0862	18.0281	15.1598	17.4345	15.1689	11.6923	14.9249	15.5888	16.8067	13.5827	14.3073	15.8219	15.6835	12.5163	12.229	16.6699	18.2908	18.4331	14.7826	18.4246	15.5869	18.2321	17.0282	19.2643	13.6637	18.5239	19.9404	14.0578	15.7809	15.7238	15.9655	17.0975	17.3849	17.3284	12.9174	16.385	14.9235	14.4853	15.4906
PLA2G3	2.30469	-1.13578	-0.603776	-0.479461	2.0656	2.17369	1.66856	0.892861	10.3955	5.2215	2.08661	1.77537	5.04994	-0.927066	-0.634396	1.34503	0.97897	2.76517	-0.563871	2.61077	0.433953	3.51515	0.0318348	0.899624	-0.766794	2.64236	0.561305	-1.17095	-0.0535707	-1.6424	-1.54744	-1.57342	-0.975798	-0.136636	2.14226	-0.517926	0.699372	0.896196	0.046409	1.6677	-1.00168	3.18892	-0.370313	1.38319	4.45896	1.74639	2.56019	1.13924	0.686728
GGT5	6.14908	8.27317	5.30046	7.35977	2.73715	10.5713	-0.546353	6.76068	5.88273	4.61319	4.19134	4.682	7.56932	4.42174	3.60343	4.15944	6.67444	5.27087	7.02549	6.52731	6.76198	5.00628	8.64665	4.54994	7.53348	8.74523	10.2994	8.86009	4.7527	8.80057	13.3112	6.65205	7.53784	11.0358	4.69897	8.46433	2.97564	3.2995	4.65354	7.02864	15.7889	5.69874	11.9862	-1.45161	1.48526	6.24029	5.09572	7.77599	7.70311
CHKA	12.7537	9.82072	9.36983	8.75224	10.4126	10.8648	7.81708	9.38455	3.06576	3.74198	6.7629	10.0374	9.51265	6.55608	4.31732	12.3124	4.46608	10.2314	5.68191	6.0777	3.69642	2.8092	4.9648	5.9311	14.3761	10.2636	10.6414	7.12415	6.37602	6.44021	4.74321	6.26278	10.2272	11.2033	1.52748	2.54097	8.26732	16.6115	12.6883	3.71342	11.9384	2.22843	6.92172	3.43932	6.71403	8.57887	10.2583	6.726	11.4846
MIF	25.1883	28.3554	24.8133	28.0979	27.4712	23.0897	29.9412	20.8237	29.5016	28.7873	30.6342	27.0996	31.7206	28.7374	30.3088	29.5274	27.6859	21.8608	27.8043	29.5401	29.5876	28.5424	27.7716	29.5165	27.2558	20.3952	28.2505	27.2086	28.0452	26.767	28.4994	27.862	25.255	23.3575	28.9283	26.5639	29.6684	26.3246	27.8673	31.4955	28.1637	31.2155	30.6516	31.5686	31.4257	27.1584	28.1815	25.9004	29.3787
ACY3	1.46817	0.760056	1.93242	2.23083	6.78947	1.16858	2.68536	0.000679912	2.00824	2.18081	1.0681	3.61257	2.37335	3.61138	1.61057	6.00155	1.52949	-1.5854	1.02248	0.878142	4.74556	3.66045	1.39162	1.81914	5.28376	6.03679	1.9188	10.16	6.48659	11.7072	3.67211	4.61688	3.16708	3.34502	0.487522	6.14931	3.67933	6.50718	2.88691	1.33047	4.7389	1.6747	1.55938	2.51234	1.33516	1.10553	4.37081	3.74057	2.67811
NT5E	22.2655	27.2499	16.1455	5.52411	2.40613	21.2273	21.8713	14.4749	15.3835	16.9322	8.67949	21.4144	4.3719	34.716	5.5313	21.243	19.446	8.90357	23.9152	4.54544	32.7812	6.49201	28.9552	7.37431	14.8243	26.8168	9.1059	17.2827	22.4517	22.154	12.0979	2.7335	28.331	26.089	8.35382	9.14988	14.6875	1.05873	11.454	10.9432	26.2196	7.51585	25.0373	2.94452	16.7122	6.57782	12.8253	17.9285	11.3882
MBOAT7	9.9005	15.2437	11.6646	15.5128	10.3655	11.6466	11.7429	11.3259	13.7774	11.9421	14.9578	9.82915	15.5624	15.7513	11.6174	14.1212	13.4394	10.2996	15.822	14.451	13.5169	9.31082	13.7431	12.424	11.2807	10.8269	10.7947	11.5766	14.4113	16.2189	13.9268	13.5006	14.5533	13.1392	10.1257	10.4132	12.6741	8.16293	10.6127	10.5655	12.2062	10.9966	12.9751	8.02286	9.96111	14.3756	16.3653	10.3054	13.3048
AMDHD1	0.140955	0.269892	0.18899	0.0473204	1.56172	0.428297	4.54236	1.30017	1.10527	5.97656	0.719395	0.93357	0.943396	-0.164884	-0.245893	-0.00403974	3.67804	1.13291	0.15408	0.239697	1.86261	0.514402	1.31222	-0.42947	1.33467	0.778968	0.715276	0.343751	0.119707	1.9256	0.844053	1.4455	0.707506	1.58904	0.15364	1.30693	-0.365002	-0.124967	0.201744	0.782084	0.342384	0.110291	0.106807	0.34748	-0.0492512	0.976443	0.781684	0.346392	2.29569
NNMT	38.6241	46.6784	36.6582	48.5909	47.161	37.2112	31.6889	44.3342	40.3316	39.7462	38.4416	49.0105	48.2588	46.3354	44.0027	42.187	49.4564	35.3173	44.128	43.4906	52.2183	41.1557	41.4928	38.6531	42.918	37.5836	48.7525	53.6178	46.6146	52.7248	48.4441	51.3288	36.7917	34.6267	43.2796	47.1626	50.3536	36.4053	50.3232	41.7236	42.6426	34.9042	46.9635	32.6697	36.3097	36.4672	39.4849	39.3142	43.9997
ACADL	3.96622	1.24461	0.793252	1.89395	6.66608	3.58811	1.29392	6.9335	0.187587	0.63366	1.29497	3.02637	1.18587	1.38329	3.13325	0.0555096	2.13509	6.44587	2.44324	2.30579	2.15723	0.991165	0.138572	3.17027	2.46002	5.82299	2.0299	1.21379	0.416785	1.97527	0.233296	3.10039	2.16167	3.57631	0.471837	2.7553	7.13707	5.00299	2.11519	3.34132	1.76319	0.920492	1.10263	1.2815	1.12236	5.56044	0.712623	2.15035	1.88694
GLO1	47.8935	48.9343	49.5941	43.1805	41.075	46.032	47.8452	45.8094	45.4706	47.009	44.4997	46.9036	46.7663	47.8909	43.5152	46.6271	45.2868	44.1677	42.7662	47.4602	44.153	41.8961	49.0171	47.741	44.9027	43.5399	47.0253	44.3125	43.5308	43.4899	44.5796	41.8836	44.404	42.6233	42.8069	45.47	46.5659	44.1495	49.5735	43.6107	45.0209	42.9917	46.3542	48.0203	45.1713	42.7477	47.9039	46.0881	47.4848
HADH	18.1316	7.57878	14.3058	7.4211	18.5076	12.0794	15.1003	12.482	11.0798	13.6996	6.99865	15.2363	9.33074	9.68439	11.0528	15.1867	8.63788	10.8052	9.38033	11.1333	11.5586	13.8864	9.29407	15.5541	11.789	13.0937	10.111	13.0527	9.56365	9.55631	9.82035	11.789	13.7392	12.9125	8.87935	10.8308	14.9807	11.7015	12.415	11.9791	11.7914	15.9331	12.3927	10.1112	13.3622	9.1081	7.87365	11.1105	7.26884
MAT1A	-0.275597	0.914048	-0.153062	2.50617	2.3818	1.10689	1.17688	0.786568	0.564348	3.10546	1.89193	1.11471	2.70695	1.42122	4.09053	1.8444	1.5156	0.503147	0.101764	0.865914	2.09311	2.25593	2.04352	1.72287	5.39748	1.30878	0.520161	1.70828	3.67837	-1.18714	0.910258	0.862667	-0.0191537	-0.372462	0.916016	1.7041	2.82186	2.55021	0.912187	2.16651	1.73469	1.12833	-0.419769	0.588045	1.15112	3.72251	1.4133	2.48738	0.525112
CA4	6.54071	7.30694	1.73219	1.65012	7.80239	9.64796	0.395961	17.1689	0.491319	-1.09452	1.42214	7.74383	2.30568	-0.336411	-0.101589	4.94386	3.08208	16.7216	9.14929	-0.260119	0.430342	2.75577	-1.33517	4.10846	1.60793	5.46805	3.1391	5.69587	0.770601	8.67303	-0.656331	6.07852	8.77681	4.05559	-2.27903	2.64828	9.11909	4.04308	2.3404	1.80811	2.43943	1.596	-0.274437	-1.27424	0.499977	16.2481	1.32418	1.56197	0.575026
AHCYL1	27.9089	24.4014	26.2939	20.8139	21.8113	27.2915	26.4322	23.8354	23.6083	19.774	19.6997	24.2611	23.9114	20.7569	22.2584	25.705	21.3524	23.1355	24.7248	22.7153	26.4751	22.0122	23.7138	21.9495	25.1259	25.7437	24.9844	22.2708	25.9897	25.5338	22.3748	25.6884	27.7276	22.7407	22.4578	22.7636	21.6045	24.0273	21.7429	20.3747	25.8598	22.0944	19.8771	20.7898	19.7559	24.3674	26.3205	25.1468	21.8153
PFKFB1	0.835639	0.845947	0.928999	0.934187	1.12287	0.894631	0.849257	0.785268	1.12207	0.904287	0.789454	0.898762	0.903977	1.00106	0.907738	0.959595	0.916155	0.80471	0.848311	0.945512	0.928683	1.04298	0.886144	0.87559	0.946973	0.826032	0.838334	0.928699	1.09061	0.828067	0.832672	0.853745	0.902626	0.883116	0.903605	0.861685	0.956	0.904939	0.796475	0.792917	0.810002	0.928156	0.87662	0.918282	0.887187	0.920355	1.01895	0.88891	0.854225
RDH10	15.5278	17.3406	16.7417	25.3001	12.601	14.8765	26.2386	12.521	14.693	14.939	20.7021	17.1105	26.9009	8.42504	20.9692	23.8828	12.0738	9.49725	13.877	17.0084	18.4817	20.5281	19.1786	22.3297	32.5274	16.865	13.7846	17.8734	23.2224	24.7162	10.7598	21.7902	14.2633	19.9957	23.9832	12.1593	23.5805	30.9386	17.9594	19.4463	20.6137	12.8634	4.87843	19.7765	24.5512	21.4875	16.2238	16.4916	29.1953
TAT	0.257419	0.555695	1.2081	1.59984	2.02023	0.19196	0.285306	-0.0858923	0.414716	1.29539	0.552695	0.312251	1.65098	0.73258	0.769953	0.838718	1.04618	0.267953	1.2144	0.727617	1.59467	1.31315	0.334642	-0.229901	0.886566	0.685357	0.552362	0.123359	2.32002	0.264997	1.29521	1.61913	1.25701	0.659984	0.525398	1.07782	1.58819	1.45915	0.968071	0.666944	1.3203	0.253158	1.25176	1.35018	1.4608	0.181375	1.47929	1.263	1.2485
CRLS1	18.0741	15.8882	8.0186	9.61962	11.3491	14.5601	10.8391	12.6498	11.9608	9.38977	10.2485	11.2266	11.4512	9.11759	12.2291	9.89196	10.833	13.371	12.3012	10.7963	7.71694	7.80892	10.7885	12.0938	11.2993	12.3296	12.1784	13.9433	10.0404	14.5817	12.6641	12.3211	11.8362	14.539	8.39003	17.0399	12.1261	13.3571	11.2678	12.3537	8.5101	7.03484	13.714	11.5205	12.021	13.5305	17.8873	12.1587	14.209
PTGIS	7.66843	9.61192	1.20527	12.6426	-3.16477	4.81051	-6.58382	10.7661	-1.34762	-4.06007	6.91061	5.3593	9.20966	6.25628	3.65254	10.0497	9.14256	10.2319	5.84211	7.82424	6.36215	9.64486	8.62592	4.19572	13.2879	3.99334	13.9263	14.1516	2.83898	8.33964	7.13397	7.62246	2.52805	2.33983	9.01626	15.004	5.4582	10.4326	3.15871	8.59495	2.23861	7.74031	6.53606	-1.36573	-1.9503	6.97126	3.91059	6.41459	15.1561
MGAM	0.925228	0.941734	0.901306	1.15856	0.583715	0.930057	0.903436	1.30298	0.809629	0.890912	0.778999	0.804332	0.930122	2.37461	0.721853	1.81147	0.856078	1.01781	1.03367	0.844055	0.848817	0.915797	0.82563	0.738986	1.25735	0.874594	0.915504	0.911274	0.737757	0.822567	1.15628	0.748415	0.757812	0.932763	0.799965	0.828641	0.685102	1.12545	0.930752	0.777159	0.902214	0.850918	0.931907	0.917143	0.807247	1.27013	1.57853	0.9573	1.05537
ADCY7	5.04393	3.67106	4.26815	3.87269	5.07473	4.37054	2.68969	4.76168	4.48432	3.40974	3.41432	4.30461	2.38946	5.9104	2.54917	3.82906	3.83671	4.83039	5.80523	2.43589	3.90294	3.09692	4.43026	2.67469	2.81914	4.36064	4.30749	3.68878	3.83543	3.76357	3.93762	5.50781	5.16382	4.83509	3.43571	5.18121	5.31245	5.10432	3.08201	4.2708	3.84925	3.05364	3.40581	4.13868	1.46874	4.20779	4.58952	4.12082	3.92802
PDE7A	4.82481	5.03185	1.93393	6.09935	3.67406	4.08384	3.81523	4.66441	4.40785	4.65021	4.01856	2.55123	5.85477	3.90983	2.26926	2.93695	3.61346	5.48491	4.73733	6.57489	7.1807	3.16486	7.06283	3.50304	3.86499	5.57609	5.77162	4.01059	2.69209	2.41295	5.70201	3.00555	4.0877	4.68742	5.01693	5.66845	4.03019	6.69151	3.84294	4.36446	3.5803	1.74299	4.65586	3.25969	3.54954	3.79522	1.85821	7.24248	5.24259
CYP2A13	0.352496	0.619539	0.742265	1.21227	2.25091	0.182585	1.39741	0.572583	0.96757	0.967607	0.240085	0.810881	1.46639	1.17937	0.764182	1.1195	0.699697	-0.174132	0.88173	0.983091	1.45253	0.713313	1.19507	0.795078	1.09463	1.18271	1.11508	0.390499	0.898134	1.15269	0.952379	0.70417	0.17992	0.796448	1.09751	1.45954	1.0973	1.33619	1.21178	1.32175	1.74162	1.27415	0.630973	1.21919	1.19337	1.58232	1.24215	0.747254	1.11436
GSTZ1	2.32673	2.42167	3.23167	0.669534	2.24359	1.41754	4.88965	1.5624	1.98387	3.65217	3.90301	2.43648	3.80891	1.7928	2.7032	3.3766	1.94565	1.37814	1.95716	2.15707	1.81385	2.51584	2.68832	2.87678	2.67109	1.20625	1.48744	3.24365	3.47144	2.02592	2.07562	3.08526	1.39945	1.34956	3.06245	2.84612	3.11671	3.7262	2.06142	3.40515	1.94986	3.05176	1.97677	3.36563	3.27446	0.403196	0.642474	2.17632	2.17166
ENTPD4	5.80289	7.88723	1.8451	6.22999	5.27062	4.46922	5.71232	5.01334	5.54506	7.55256	6.78478	6.93618	7.19384	5.51325	7.38253	4.4818	4.8116	5.3963	7.67039	5.18023	2.76772	5.44339	2.87176	8.99921	9.18236	4.06362	6.19277	5.98964	8.35007	6.97039	6.19679	9.25268	5.20442	8.87714	5.41594	7.39999	9.95333	7.25728	4.91225	6.31817	7.59106	4.84456	6.50562	5.51776	4.55744	3.80116	5.13953	5.68244	8.10177
ITPKB	6.59987	5.38717	4.33928	6.11619	8.71139	7.94769	4.53324	8.44556	4.69797	4.51953	10.1372	6.54863	5.54613	4.13424	9.15516	5.89672	5.46013	10.5423	9.45655	5.90593	4.29693	7.14349	5.85201	5.68805	5.72544	6.97787	6.05327	4.31134	4.01575	7.8946	5.29538	8.87794	11.8462	7.26507	8.51977	6.69026	9.24087	6.09284	5.92383	10.1722	6.59034	6.191	5.9396	10.4961	8.26952	7.22784	5.03338	7.24553	5.41635
P4HA1	23.3328	25.2162	27.7551	24.6934	29.3675	24.7012	25.014	22.6738	27.7594	27.0426	27.0447	25.5699	26.8393	31.4388	27.8842	28.5548	27.2853	23.1606	27.1884	25.8242	27.9511	23.6008	29.1924	22.2559	25.0165	24.0403	25.5267	26.8901	28.4594	26.0556	28.4929	24.186	22.0238	22.703	29.313	26.7258	25.8464	24.0323	27.7453	26.7738	25.1771	27.8374	29.8554	23.0149	22.9673	24.5564	28.5942	24.9291	31.2707
PGM2L1	9.09822	10.2018	7.59198	5.66173	1.90023	6.91329	3.76084	1.37603	-0.100261	2.9411	0.61777	2.73853	4.17699	4.60198	3.88664	0.570698	5.72482	0.673072	7.05778	6.28724	10.1062	0.1752	5.39413	4.05698	5.05152	2.24987	4.02954	6.49482	6.2269	7.76986	6.36052	3.95548	3.92546	4.96462	2.91327	2.22694	4.50107	12.5312	4.7358	1.01332	9.89384	4.69223	9.4961	0.943052	1.07842	6.2954	10.0667	5.12759	3.47029
PAFAH1B3	12.1803	20.3437	19.0674	17.7354	13.2159	10.4614	20.1279	6.87647	16.0403	13.0941	16.7785	17.0243	21.8811	25.1377	20.4118	21.5976	16.1061	4.9793	15.4374	16.0832	13.8571	13.314	17.6015	18.4561	16.6706	10.3709	15.3783	10.6821	17.1865	17.2186	15.3714	15.2519	16.8531	11.2809	7.47131	13.1816	11.3268	18.2037	19.9213	11.9567	12.9648	12.2734	13.2877	13.0285	14.1498	14.7498	19.0634	17.5881	20.0424
SMPD2	6.19184	2.84307	6.15032	3.41343	5.85607	4.44022	7.6368	5.11095	4.80039	3.66726	3.97038	8.46926	6.31769	8.5178	3.87328	4.94218	2.4853	2.85181	4.47453	6.67095	8.27901	5.473	3.10322	4.68877	7.47311	4.83288	4.00796	6.93274	6.22991	6.09957	7.22649	4.46792	6.15306	3.01259	4.10285	3.88731	6.31245	3.47836	7.37617	4.36536	6.30764	1.2939	4.76316	5.85307	6.32815	2.5745	4.80973	5.44687	4.47884
CYP3A5	2.68121	-0.14406	0.16074	0.522583	0.889438	7.95195	6.46371	4.82499	-0.102004	3.25077	-0.112805	3.44934	-0.0276943	0.734796	0.1626	-0.458641	0.58682	5.02804	2.35004	0.568132	2.76531	6.99376	-0.511179	3.33509	-0.0979711	6.76536	-0.7507	3.91268	4.11145	4.74055	-0.203994	1.11906	-0.126566	-0.0215701	5.78096	1.52068	2.12648	-0.238977	-0.553125	0.417389	0.193673	0.852909	0.114518	2.75832	2.43509	2.50728	2.26301	4.1273	-0.184785
GMPS	1.95253	4.00897	3.47706	5.7196	1.07581	3.70939	9.85121	2.4087	7.81628	9.05094	8.15287	4.76572	7.62666	6.19134	5.18143	6.77015	2.04208	2.77808	2.42292	9.94222	1.77499	7.51817	4.46047	8.4853	3.01296	4.31615	3.32614	3.71513	6.43144	2.79163	4.2165	1.67819	4.14385	5.11502	7.1574	4.18037	1.75524	8.25334	5.116	7.08185	3.98673	9.66079	6.84229	10.8618	8.15142	4.23542	8.18633	2.23862	5.15862
RFK	6.17001	9.37619	5.64682	4.37591	5.08309	4.92566	4.74351	6.98135	3.56245	2.78764	3.44584	7.73655	4.61593	7.28353	6.30134	7.37454	6.40784	6.53235	10.5714	5.23613	9.1837	2.65872	8.10959	4.05228	7.41481	8.56379	7.98086	9.82763	11.85	14.7366	6.66388	6.9231	6.92819	5.90888	5.54877	7.68828	8.76551	6.90663	9.56146	6.42406	10.1022	4.94837	4.37927	5.8949	6.04541	3.67765	3.42847	10.3514	9.97627
LCAT	5.03828	2.99167	4.38673	2.50229	3.40687	5.01506	1.48391	7.00201	4.21029	1.39908	1.80094	1.87064	1.91638	3.02421	0.27448	1.5827	3.98602	6.62829	3.79911	3.21187	2.28096	2.40862	2.60476	1.99708	2.77477	3.92878	3.39817	3.31449	3.76538	3.20317	4.63865	2.11864	3.96593	6.81983	3.43158	1.24824	1.67265	1.70679	1.56411	2.40372	2.7691	1.69731	5.83892	1.98944	0.0415809	4.2242	3.39926	3.88856	3.16539
POLR2J2	1.02402	0.981744	1.01058	1.06147	1.07673	1.03444	1.05624	0.980801	1.01909	1.06027	1.03007	1.01006	1.01953	1.03104	1.02664	1.07286	0.997445	0.971304	1.00724	0.988413	1.03036	1.01669	1.04827	1.03698	1.00826	1.03365	1.02304	1.00066	1.03768	1.02549	1.05526	1.02337	0.998285	1.0572	1.02908	1.0082	0.971864	0.974608	1.00048	1.08775	1.02486	1.04366	1.02267	1.08675	1.05246	1.03132	0.991569	1.01231	1.05149
MTMR6	4.38434	6.24579	3.96454	4.92746	4.19709	5.93412	5.64247	8.54664	2.7226	2.34567	4.17515	8.18132	4.43201	5.22916	5.81731	6.70788	6.38586	7.97796	7.93726	4.04361	9.49909	4.2657	6.67659	4.61774	5.98117	6.70913	8.43301	4.45674	2.16736	7.05958	6.58167	7.09185	9.78586	6.46577	3.70972	8.14946	4.50924	4.07544	5.86992	6.44967	7.95354	4.0177	4.29998	5.95516	3.75363	5.18919	4.78505	8.04326	5.30777
ACSM2A	0.709001	0.721359	0.706735	0.721017	0.792138	0.725831	0.689694	0.678857	0.699157	0.732762	0.69556	0.686352	0.712299	0.755831	0.729065	0.709856	0.763042	0.728118	0.700833	0.70103	0.719147	0.680202	0.716564	0.687298	0.700137	0.70052	0.727454	0.681139	0.721797	0.733864	0.70029	0.71787	0.708226	0.719806	0.714067	0.703914	0.716926	0.711951	0.747126	0.700136	0.72789	0.704212	0.708885	0.725969	0.701859	0.728384	0.762995	0.737737	0.706408
UGT8	-0.804049	0.688993	3.57849	-1.25062	-2.69885	-0.927968	5.24951	0.839592	-0.493686	4.75149	2.86775	5.02254	2.4657	-2.05697	5.12893	5.69209	1.76194	-2.06555	-2.22133	3.31604	3.94817	2.42581	3.37516	0.134033	5.63167	4.39981	-0.393921	5.49824	4.58893	-0.846355	-1.83377	2.94569	4.24052	1.90117	2.58615	-0.0442442	-0.771179	5.01395	4.42258	5.89182	4.61445	6.82127	2.34781	4.57891	4.78576	-1.4973	1.53608	2.22829	-1.81249
LDHAL6B	0.95855	0.538437	0.758325	0.987013	0.906922	0.559759	0.600896	0.780979	0.297718	0.846467	0.6459	0.561135	0.702252	0.530797	0.658561	0.537173	1.08588	0.850384	0.463835	0.68623	0.856012	0.782656	0.706578	0.842347	0.61046	0.938917	0.712777	0.897986	1.03645	0.65133	0.838354	0.753775	0.922618	0.698415	0.76187	0.929149	0.641285	0.790484	0.895418	0.859231	0.701932	0.950838	1.11485	0.635065	0.735411	1.1178	0.771372	0.849508	1.18816
PDE4A	5.33099	5.73619	3.39003	4.89695	8.25458	5.43707	3.30458	4.863	3.18354	4.2354	3.44419	5.89399	4.78205	4.92332	2.85248	4.25157	2.97674	6.27207	6.30861	3.90326	6.27183	3.14789	8.02259	3.73361	5.94106	7.20578	5.93383	5.36791	5.10477	6.68059	4.50091	6.04467	7.48445	7.21327	5.47132	6.13885	6.01386	3.99501	3.11996	4.53694	6.08269	5.12387	5.4789	3.25743	4.88365	5.80486	7.53219	5.43236	6.3037
NUDT2	3.22761	4.55513	3.31492	6.86012	5.11548	1.90876	9.89087	8.15261	6.68263	8.14377	6.93679	8.80284	6.1398	5.54167	10.2927	2.8779	8.67579	6.32579	4.2364	7.61731	7.30874	10.138	5.36341	5.79355	7.97079	3.75126	6.39185	3.60309	1.88021	4.16415	7.16017	2.4503	0.810785	2.70937	2.46396	5.40544	4.3945	6.13429	5.42135	10.8465	5.35083	6.96434	6.26161	7.32034	6.65933	3.13007	1.81128	9.25159	8.32011
PLA2G2F	0.900792	0.710995	0.817251	0.501752	1.01448	0.969356	0.889563	0.888051	0.646479	1.05341	0.844847	0.908412	0.550214	1.5422	0.840836	0.957562	0.628494	0.954812	0.668003	0.718317	0.835371	0.843819	0.982784	0.670763	0.642497	0.879719	0.987282	0.890684	1.41127	0.70333	0.999097	0.800192	0.785912	0.721717	0.988981	1.23178	0.961523	0.982335	0.399846	0.613658	0.74135	0.527605	1.09225	1.00385	0.758758	0.849213	1.06858	0.481967	0.858547
INPP5E	3.25026	3.45424	3.04981	2.70581	3.51012	4.57583	2.34662	5.106	4.24969	5.21292	6.4155	2.99131	1.75168	5.88454	3.36985	3.46502	3.43281	4.93113	5.04804	4.90831	3.90405	4.02662	4.62438	2.19602	3.28131	4.13372	2.6864	2.38348	0.462808	4.29038	3.57697	2.28808	4.02229	5.44363	5.8916	3.14311	1.93565	1.76317	1.87463	4.21129	3.05267	4.43772	2.86365	4.15955	3.11982	4.72733	6.55528	5.33082	2.27941
HAO2	0.80838	0.838062	0.826573	0.886717	0.898176	0.791961	0.824907	0.803416	0.857174	0.949754	0.78794	0.866118	0.803763	0.832196	0.839404	0.812728	0.81557	0.784159	0.822181	0.824449	0.86635	0.879548	0.777284	0.782554	0.804893	0.826474	0.773192	0.824439	0.880173	0.820628	0.837053	0.771248	0.816962	0.729026	0.82898	0.830789	0.858977	0.867429	0.852827	0.780279	0.850162	0.790155	0.852115	0.853761	0.885104	0.858652	0.840943	0.827546	0.836834
PDE1C	3.38228	0.570832	3.29845	0.905106	0.845368	2.41187	1.05936	2.37493	0.70169	2.37544	0.591347	0.43609	0.672265	1.05299	1.0629	0.489777	1.09141	1.84236	1.09681	0.446662	1.02404	1.55388	0.681359	0.84466	0.841128	1.05217	0.706804	1.26916	1.95479	1.57514	0.984317	0.845271	0.833769	1.53241	0.503573	0.650355	0.895117	0.860831	0.814682	0.996456	0.467101	1.16778	0.815519	1.37969	0.598736	2.31032	0.87386	0.729029	0.789472
TPO	0.901056	0.927024	0.906823	0.998566	1.04483	0.740684	0.710865	0.696722	0.786151	1.15357	0.850795	0.758702	0.841673	0.923663	0.909112	0.71294	0.918138	0.67668	0.721579	0.925867	0.758276	0.763717	0.718779	0.995981	0.826525	0.686849	0.749836	0.839484	0.937873	0.763069	0.885366	1.25226	0.753749	0.838829	0.678193	0.96565	0.691229	0.740722	0.749034	0.930929	0.830004	0.768007	0.899778	1.00805	0.773622	0.899887	0.813168	0.75639	0.979999
ADO	3.72182	6.32219	4.00345	4.29243	4.89233	5.33917	6.1432	5.38326	7.94977	5.40557	6.05579	7.22678	4.67325	6.02018	11.9162	9.09712	6.22559	5.39887	5.61533	5.95506	3.14931	7.88799	6.26685	4.91849	5.06316	5.98575	6.14152	5.36422	3.12248	7.2457	6.16596	5.53529	6.2235	4.49624	7.13296	7.1541	5.66505	2.56065	7.2742	6.41202	5.40998	5.69803	5.02812	5.5835	9.63072	4.63891	4.5758	5.29794	6.67196
IPPK	1.19197	1.45822	1.56265	1.36223	1.57803	1.36096	1.88156	1.16357	2.41262	2.33337	2.22301	1.09947	1.6048	1.74836	1.83025	1.2328	1.60671	1.07512	1.40702	1.67148	1.14004	1.96403	1.42342	1.74904	1.26478	1.09691	1.177	1.33105	1.3315	1.44962	1.5666	1.31684	1.01341	1.30923	2.07338	1.42667	1.63254	1.29895	1.25594	1.77462	1.25265	2.29041	1.33274	2.31898	1.87431	1.49909	1.61185	1.31404	1.27264
GPX3	66.8571	61.1755	68.1151	61.682	76.0642	69.4692	52.3589	75.4181	38.5069	61.8759	54.3214	64.5933	57.3788	57.7307	52.3647	57.6668	61.7874	75.4411	69.9164	64.589	73.3863	58.8427	64.6564	58.2125	68.2622	68.2782	67.9766	65.131	66.3479	66.4712	56.1978	72.2941	64.149	62.7973	59.4464	70.3021	69.4122	61.4876	62.4808	60.6898	67.4308	56.0301	55.8153	58.9452	49.134	76.5788	59.8207	68.7853	61.6672
TK1	8.88399	25.7262	23.1561	24.7188	8.11991	10.1779	34.2187	8.079	29.9228	26.33	30.6671	10.9913	29.5881	31.2771	31.8045	31.9706	26.8013	7.94961	10.0398	27.0195	20.0453	29.8097	24.5972	27.6243	25.4556	9.70126	23.6983	25.3971	27.3761	11.8224	20.6423	15.8312	12.625	10.0254	28.8739	29.8808	13.7882	28.1795	21.6939	27.4393	16.1963	28.3631	25.6989	27.5554	30.9606	20.0267	18.414	17.4075	18.1214
NME4	17.3968	17.1175	16.1554	15.4502	17.4649	14.1565	15.222	12.8324	13.8724	10.7462	18.1531	17.1667	19.2267	15.265	15.7515	15.1061	19.8143	12.1582	14.6026	14.4447	16.7957	10.2669	15.5044	16.431	22.616	13.1336	17.6745	17.0569	21.7112	20.0367	16.4782	17.7721	15.1489	17.6211	17.3949	17.9568	18.1439	19.3365	13.0031	18.9454	16.887	15.4549	17.8291	17.8305	21.5664	14.0235	10.124	15.9923	23.4396
ALAD	11.057	9.9322	8.9105	6.44887	10.5787	9.96968	8.50008	8.57223	7.52887	9.10353	10.6235	10.9729	7.42516	8.13	11.5734	12.2742	4.75997	7.01798	10.518	6.1189	8.83889	8.08497	10.8062	6.35834	8.98881	10.5998	9.06231	8.08471	6.65041	10.6436	8.1959	8.28759	9.10083	8.17384	7.53996	10.715	9.12381	5.938	6.5431	8.84193	10.8563	7.83865	6.8407	9.25957	11.789	6.95186	6.62072	6.80375	8.07772
DHRS3	20.9907	21.5291	19.3253	27.5852	24.6557	29.1266	31.2458	27.1429	20.1408	18.0504	23.7855	20.7303	28.2006	16.8846	19.9657	26.0152	16.5656	26.3924	24.5428	21.3106	29.5313	28.6432	20.5759	28.5953	31.9892	27.0428	27.1333	26.0796	25.4553	28.9086	20.5677	16.195	24.3772	25.1016	26.0978	25.536	18.4465	28.111	19.2853	19.8313	26.6182	22.3888	22.1361	20.1044	19.3845	28.3669	23.017	20.1115	26.6322
ALDH1A3	4.95465	8.28899	4.48147	7.88331	-2.86497	3.58085	4.94958	3.77019	4.63309	5.63739	2.80667	5.28574	7.14122	7.13158	1.8639	5.76282	7.67081	1.82663	6.14986	3.90996	5.23186	5.78335	6.3124	3.09715	4.8919	3.31311	6.20829	5.72169	0.865541	5.48301	7.21029	-1.03326	-0.00426658	3.55765	7.95491	5.48975	2.48157	1.01197	4.19188	4.25463	4.63498	5.51958	4.62336	2.62682	2.64375	1.94691	3.04558	2.29042	6.15732
POLE2	0.137664	1.61051	2.0601	2.14923	-1.77506	-0.708973	4.67038	-0.698193	5.43679	2.91066	3.5463	0.760665	4.00792	3.38132	2.45704	3.68844	2.5623	-0.439472	-0.0578738	2.41118	0.193853	1.90773	1.67433	3.36286	0.216519	-1.26706	1.26332	2.62552	2.70263	1.01275	2.00287	0.650058	0.472885	-1.35768	2.21794	1.39026	2.18982	3.16157	4.18312	3.01322	-0.247263	1.98845	2.60697	1.98959	4.09046	0.976404	4.34621	0.305028	1.33274
MARS2	0.445858	3.04913	2.45952	2.1369	2.18733	1.62737	5.12785	0.852671	3.81162	1.79515	3.84404	3.77812	3.8844	1.41254	4.66878	4.04014	1.68755	0.619502	2.27326	3.23724	1.50851	3.21659	3.43483	2.66577	2.53149	1.72631	2.32997	2.31909	2.27327	1.62923	3.19408	3.9104	2.22626	1.10735	2.60627	2.21089	3.26298	3.85998	4.00716	3.76136	2.71549	3.57904	3.22023	4.59694	5.65428	1.37077	3.57081	2.19554	3.54419
NME3	19.7706	17.7965	23.5664	17.2796	19.5066	18.6085	21.0197	18.7973	15.4096	18.0803	17.3712	20.0916	18.3756	17.9393	14.3339	17.1015	20.019	19.4093	19.5743	15.6179	20.4077	16.8716	18.1247	18.0677	22.6097	19.668	17.4686	20.527	19.4398	24.352	18.4009	21.0588	20.8185	20.3299	12.9003	19.5291	21.3086	15.4607	15.1844	17.9164	19.4055	15.4045	17.9074	14.1847	17.2204	16.6358	12.2349	19.3319	19.1115
CPOX	5.58286	5.85672	5.50039	7.60955	2.63101	5.57858	15.8672	2.26501	8.78091	11.248	7.38325	7.48584	5.34511	7.72293	6.06559	7.64878	5.99865	2.87421	5.77157	6.03836	6.23171	12.9793	5.51979	8.94639	4.3788	4.65853	4.71081	6.32924	8.87984	3.17688	7.77785	5.28537	-0.0876728	5.35925	10.0968	3.94806	4.52541	9.98981	4.26605	9.07188	6.03563	5.29041	1.42466	10.4216	9.55995	3.55936	4.55246	4.425	7.80702
PGM1	21.13	16.8634	22.1527	16.8043	12.6816	19.7175	14.9082	20.6813	19.1239	12.353	12.2111	17.1317	19.8911	22.6382	10.587	15.2687	17.7876	20.6652	16.9335	17.6404	19.7248	14.4972	18.8626	16.9779	19.4815	19.7862	19.1329	20.3541	20.5467	17.7814	19.8135	17.7825	14.2199	17.0736	15.2828	19.2634	17.8834	16.7709	18.0543	15.0498	18.6034	17.6292	18.859	12.0899	3.41531	16.2596	11.4604	15.9931	19.4912
ACP1	13.0823	15.4951	16.8464	12.3287	13.2184	10.3706	13.8979	10.5852	14.0601	14.7227	14.4452	15.3693	14.7246	16.8698	2.30176	18.1089	12.1496	9.79563	11.8381	19.4357	13.9413	14.1265	14.449	15.5099	14.268	11.4262	11.8352	14.763	13.4584	14.7097	13.5473	14.2303	12.6939	11.1737	15.2611	15.2744	15.5892	15.5898	17.9484	18.3537	11.9184	14.4178	14.3405	16.8302	17.1777	11.6094	12.7639	12.8187	15.6789
ARG2	1.91419	2.71785	1.79909	-0.866855	1.72692	3.36761	5.81651	1.59589	2.49205	2.62448	2.67667	-0.337737	5.39845	-0.734819	0.469829	-0.918315	2.07422	-1.26053	2.72491	1.05758	-1.74757	2.51433	-0.140311	4.76759	1.73247	-2.54043	0.0664643	0.115835	2.79546	5.22875	1.96743	2.04698	0.900136	2.83117	1.13132	-0.0349693	6.36408	5.43499	7.75659	2.50052	-0.377108	0.863686	4.57192	3.22096	4.45357	-1.48488	-0.953625	-1.20263	2.90833
ALOX12	0.604308	0.789152	0.833538	0.95834	0.664389	0.724874	2.77105	0.616396	2.61247	3.00527	0.988932	0.506481	3.09251	0.810691	1.55144	1.00035	0.303965	0.900879	0.478088	1.95589	0.716577	2.37446	0.692364	2.07507	0.701576	0.412256	1.00261	1.05897	1.55043	0.537463	1.6085	0.804074	0.705477	0.507703	2.73916	0.700126	0.797903	0.97162	0.911023	1.37034	1.05575	2.17632	1.10905	2.42022	3.63477	0.999526	1.06037	0.646237	0.742195
CYP2E1	1.35594	0.778026	0.719438	0.918957	1.34186	0.618335	0.846298	0.907843	0.781974	0.832934	0.581298	0.811786	1.28038	0.89945	0.762951	0.724848	1.7726	0.919829	0.811099	0.871763	0.984461	0.892663	0.826452	1.10545	1.78345	0.675277	0.928844	1.4386	0.783402	1.03567	1.01908	0.893012	1.30908	0.816135	0.982774	0.835484	1.01171	1.00287	1.31009	0.737256	0.795365	1.96464	1.25545	1.93121	0.832052	0.871502	1.18466	0.705954	0.942943
ODC1	57.4206	62.9594	63.594	63.689	71.8825	57.9774	62.9751	61.4453	64.5718	67.8085	70.8199	62.2036	61.8061	57.3841	72.6566	62.3389	61.4192	59.5089	65.5997	69.9368	57.8149	65.0715	65.7239	66.2915	58.4692	63.8631	57.79	59.8268	65.5218	66.9588	61.3739	72.6821	60.4695	62.7397	67.4894	61.3297	74.8104	64.8557	66.6871	71.7447	60.1166	68.6431	62.8636	74.1869	75.3155	55.5383	52.5938	60.0749	74.6358
GPX7	-0.0780822	3.39503	10.782	6.29391	-5.22437	7.9671	5.07122	5.1287	6.6461	5.72385	5.0942	7.00339	13.1297	7.96795	9.52554	3.06595	8.50656	3.51709	3.24253	9.4022	4.84271	7.03241	6.5028	11.9974	0.591609	3.01895	10.0066	7.09398	8.4846	6.87613	10.0921	-0.192143	2.89371	3.88979	4.97798	7.78519	4.73713	-1.80827	9.625	6.95651	4.2476	9.32465	9.07078	1.96758	-1.38287	4.39974	6.49146	8.15496	9.53011
GSTO1	30.555	33.6663	33.2514	35.3517	35.8906	34.5953	38.4643	39.4453	41.2074	37.6925	38.7097	38.1107	41.9626	40.7208	45.7738	37.5781	38.8776	40.985	36.6695	40.0801	36.5473	37.0936	39.1834	37.6293	38.0122	34.6069	40.0974	37.8449	32.3386	40.1022	40.2469	36.0385	34.867	33.9708	40.4057	40.5889	35.1495	38.3322	37.8589	43.1317	38.2593	40.9071	40.2618	39.7088	39.9483	37.7877	31.8904	39.513	37.4168
AOC3	24.3557	20.1142	20.0661	20.125	19.5126	28.374	-6.66362	30.7523	6.23436	-6.9839	7.16634	22.0922	14.3468	17.3281	10.3027	16.1086	18.7866	30.1422	25.0641	17.1911	12.2548	14.8707	17.789	15.4691	15.7257	24.7521	23.5439	21.71	9.38779	22.7733	18.8061	16.0633	15.6172	21.9806	16.2573	17.7668	15.0894	12.8337	13.1837	15.1278	15.5116	14.3277	15.6025	-12.4677	-5.27602	27.9021	10.027	23.3039	15.4768
PDE4B	1.80618	2.47661	1.84267	4.50414	2.99463	2.53793	0.915982	4.44632	0.565767	2.95068	2.13418	5.44374	5.05655	2.17705	4.576	3.70966	3.57849	3.23491	3.9043	2.4734	4.67083	3.32293	3.70663	1.53528	4.1705	4.64841	5.36829	5.05021	2.47631	2.66079	4.01504	2.74124	5.1805	2.19727	0.565417	5.16946	3.02047	1.51292	4.40887	3.11369	1.70062	2.39145	3.37885	3.44133	2.59042	2.87939	1.61666	4.15519	4.56871
MBOAT1	10.319	10.6146	10.9541	7.82965	1.55477	8.35882	7.71605	7.80163	5.04204	1.76169	4.97114	7.26893	7.24139	1.52316	4.44272	10.6236	7.33262	7.09474	5.31723	9.81221	6.13172	3.4872	7.36315	7.2658	6.55361	8.50284	6.21626	8.16671	10.5631	5.6583	5.56056	4.40323	7.03589	7.18995	5.05348	5.29683	6.40926	12.3069	13.8901	7.97792	9.42622	6.04471	6.94805	11.0953	10.6311	4.62581	9.34754	6.14701	5.89231
GPT	0.0393727	0.46345	1.32694	1.61286	3.9762	1.88199	0.792508	-0.635031	0.520385	2.52505	0.220279	1.47607	3.21498	2.03396	1.3224	1.24391	2.34944	0.210111	1.89617	0.322416	2.65378	3.66348	2.38078	0.516233	2.91408	0.966359	2.09141	0.725288	3.14444	3.72873	2.30596	6.97714	1.79287	1.38007	1.23986	2.94346	1.52156	1.67557	2.60652	0.665344	0.709419	2.46627	1.35237	1.6177	1.88752	1.67277	1.71928	1.96587	3.00488
CA6	-0.911667	-0.395225	-0.303803	1.36907	2.58679	0.0556412	0.57017	-0.800356	0.479445	0.680444	-1.26172	1.28436	0.203223	2.42293	1.17457	0.0351493	1.18769	0.134001	-1.04484	-0.878391	-0.0326271	1.50556	0.96149	-1.52786	-0.255609	-0.530382	-0.746583	0.430478	1.39269	-0.513929	-0.485762	2.25177	-0.440232	-0.140303	0.762732	0.349179	0.315958	0.229479	-0.0710253	-0.345499	-0.381208	-1.67907	1.39266	0.469921	1.89095	0.380372	1.66252	0.597099	-0.222349
TXNRD1	35.902	38.7131	39.9825	42.4227	46.6256	36.8857	39.5528	36.4623	32.347	33.6535	43.6323	38.6504	38.9128	41.5721	46.5615	50.9565	43.352	39.3622	40.8102	44.0373	35.8067	36.7544	42.6381	36.3038	45.7056	37.9255	38.114	42.755	48.0078	37.7338	36.592	44.5496	39.5336	35.4732	45.7826	47.0406	45.7705	46.5899	42.1226	44.9254	42.7791	39.6326	40.3911	42.2497	47.2166	39.1037	46.2345	39.9594	40.0703
COX15	6.64657	7.67065	8.35929	6.43405	13.1057	7.32375	10.2408	8.09804	7.93198	9.96404	5.56989	10.6917	7.87505	9.5242	8.50374	9.95566	6.91065	8.27002	8.32526	7.46414	5.01435	7.00122	6.77789	7.7145	11.231	8.64475	7.09921	9.86357	7.47946	9.24437	6.17143	10.4186	8.78073	7.70948	10.8544	9.11587	11.844	8.33627	11.9176	5.77609	8.79896	9.05555	6.00354	8.1902	8.60301	5.6706	4.75608	6.64107	9.55466
KYNU	0.512221	0.398927	-0.199834	6.92929	1.36594	1.85109	9.13283	2.65581	1.60598	6.56209	-0.326571	2.56838	6.27698	5.31454	1.08132	6.29287	4.53803	4.07633	4.62911	2.3688	5.92175	5.65789	4.65836	4.27885	9.38234	1.77324	5.67735	8.03991	11.7153	8.92566	5.39242	5.4267	-1.95853	0.68918	9.57097	5.04261	8.76265	12.6564	3.25555	2.79921	5.00781	4.05972	4.0422	-2.40565	1.01946	3.4214	5.18611	4.86281	3.22286
ACPP	1.87995	2.11731	1.84829	1.59901	3.15059	2.38904	2.54743	2.23457	1.39334	3.69793	2.3379	2.57911	2.63177	1.76981	2.47938	2.33221	1.31248	1.68004	2.39133	4.70408	3.40444	3.74314	1.69904	3.10113	2.04753	2.07904	1.26246	2.04339	3.47475	2.05674	1.65019	3.61578	2.27139	1.83781	3.35581	1.73937	1.97144	3.66466	1.501	2.86371	2.61881	4.86627	1.85454	4.5016	4.86104	2.01235	1.66399	1.69842	1.72533
CAD	5.06553	5.96153	8.01684	6.7046	5.26122	2.99936	4.42461	2.17072	8.84268	6.13692	7.63941	4.03836	7.10339	8.22855	6.66489	4.90458	7.30184	3.27063	4.10947	8.08653	4.952	5.93424	6.29121	8.78288	5.49754	2.19181	3.33372	5.85816	8.96412	4.11568	6.07523	5.00247	3.24971	2.92164	8.0339	2.75517	5.59046	7.35321	8.16672	6.78134	2.65944	7.69991	5.2944	8.21019	6.49739	4.8918	3.99613	4.59502	7.05387
UGT2B28	1.31015	0.598753	1.19933	0.786491	0.919918	0.969637	1.00552	0.879575	0.721527	0.800494	0.78915	0.897777	0.986597	0.81169	0.714519	0.859157	1.11398	0.620292	0.771072	0.74083	0.959147	0.814578	1.67502	1.23113	0.754632	0.843216	0.71771	1.41375	1.65146	2.45718	0.952983	0.953266	0.836731	0.844016	0.724054	0.752671	1.26205	1.30035	0.980744	1.03988	0.734898	0.770322	0.813252	0.904597	0.826303	1.08281	0.85506	0.984502	0.817546
PIK3CG	2.76739	1.6915	1.72086	3.66194	1.83629	3.34265	0.569988	3.12543	0.706232	0.15128	2.24101	3.21385	2.39835	1.11769	1.80713	3.73656	3.93591	2.78726	2.79894	2.16151	3.40591	2.52957	3.68281	0.78843	2.68852	3.38766	4.69184	2.54332	0.270929	2.25778	3.43679	2.4173	2.4204	3.09233	1.63716	4.47707	3.04214	3.06918	2.61637	2.55116	3.00962	2.24634	2.26321	0.0799692	-0.203395	2.60447	3.04997	3.26697	4.58988
ASL	14.2405	9.72441	13.7631	6.8865	12.9972	13.3781	11.3557	12.2405	6.64373	10.7191	7.31294	13.0068	12.6483	12.7694	11.0604	8.57402	12.7551	11.481	10.431	6.81526	14.8131	8.81917	9.26659	8.34338	20.6572	10.3844	11.4086	15.1451	9.7381	13.7661	11.0894	12.2465	9.65093	17.5628	14.4518	9.37401	8.41999	11.9827	10.442	9.22026	11.066	11.4212	5.73019	11.5474	9.68917	8.62212	8.21931	9.67704	17.7507
GSTM2	2.5212	0.957288	2.5881	1.64736	2.06867	1.93228	4.4515	2.84379	3.31765	1.70677	1.89471	2.06398	1.58368	2.1711	2.44704	2.03695	0.643986	2.48766	2.16049	2.59657	1.87247	0.735549	1.182	2.93499	2.68976	1.55646	1.63228	2.05407	2.232	2.07979	1.28269	2.2779	1.12291	1.74764	4.24336	1.77974	1.26239	1.9719	1.88709	1.98827	1.67444	1.52237	0.822237	3.06859	4.49305	1.59729	2.35589	1.99211	2.48114
HK1	18.6704	17.9055	17.5408	18.7862	19.486	18.1267	21.0698	18.0698	19.0202	21.1505	20.3941	16.3251	19.4332	20.3718	25.0797	19.1441	15.9913	17.1943	19.7036	18.4672	15.8007	20.4819	18.4466	16.296	17.9551	17.9754	16.9971	18.6239	16.5332	19.5593	16.6776	17.5639	15.1911	18.3239	20.4485	16.4835	19.0509	16.5982	14.6422	20.2197	19.6737	19.2593	17.5324	20.3128	24.8604	19.5465	16.4829	17.3866	17.6288
ISYNA1	8.55777	11.457	11.7749	9.19493	13.2264	8.12542	9.62891	6.59102	6.45312	6.33945	7.91069	9.04996	11.9244	11.3686	2.64927	7.52632	11.4492	8.90992	9.72633	9.05232	9.63548	8.68095	10.1603	10.9145	11.5858	8.50828	8.54485	9.49461	11.1358	11.7559	8.64327	11.2599	8.82945	10.1415	8.62074	7.73389	9.64416	10.3723	7.67973	7.49549	7.40941	7.98626	6.6341	7.04284	12.7439	7.1118	6.182	7.79452	11.5681
TRMT11	3.8174	4.27185	3.23755	3.24226	5.57316	2.96891	5.50337	3.40495	6.23697	1.8554	3.4606	4.96316	3.55034	4.23336	4.05816	3.72321	4.19147	2.96687	3.77535	4.20247	3.47986	4.71825	3.48718	3.82713	3.07211	5.44105	3.17872	5.1623	2.12303	4.41142	4.0281	1.25071	4.44993	3.47777	2.80442	2.99942	4.02196	4.77879	5.64547	2.9832	2.65417	0.213384	4.70647	3.89042	4.91931	1.31218	2.7572	3.63327	3.37106
PTGDS	30.7534	29.2891	24.3349	34.979	25.3038	35.4335	12.8617	36.258	12.962	16.0037	22.2969	29.8876	25.4988	21.9527	18.7332	27.5711	30.0533	40.0388	33.6488	28.3852	24.2268	32.3327	27.464	21.5152	30.1017	34.6106	34.4272	27.7372	20.4573	27.1016	30.824	24.2371	23.9145	33.0008	25.9928	37.0854	26.2674	21.5061	28.7133	24.1373	22.1501	22.7067	22.8693	9.95954	15.85	33.5105	25.1409	38.9861	32.4795
CYP2U1	2.91644	2.35884	2.27307	2.475	1.98332	2.93483	1.68265	3.00576	1.09522	1.66252	1.09813	3.30131	2.13154	1.42419	1.24828	3.01422	1.74425	2.72678	2.30758	1.37315	1.76558	2.08986	2.34989	2.60831	2.05611	3.09499	2.80509	2.43734	1.36527	2.08849	2.21782	1.78582	1.6948	2.66627	0.637864	2.4327	2.52301	1.93043	2.07307	2.6339	2.30056	1.93968	1.79662	1.41463	0.81307	2.29442	3.0187	2.63254	1.65467
INPPL1	18.3402	18.3356	19.6664	13.1559	18.6676	17.8396	13.2764	17.8753	11.9413	9.28433	14.7859	15.4061	12.5162	13.548	12.1756	13.0369	14.256	19.3504	18.8341	12.8021	16.8781	11.3715	19.5563	12.443	19.3167	19.7214	16.8682	18.9784	19.7851	18.9681	13.5953	19.4535	19.5831	19.8106	14.4442	15.6746	19.6999	12.5414	15.9589	12.8716	17.4321	12.9818	15.4919	10.9917	12.8008	16.6232	20.0287	15.2423	18.373
NUDT9	8.95101	7.68681	6.11163	7.57102	10.905	5.48453	10.6086	9.89457	7.99007	9.6729	5.40302	8.04595	6.39418	7.84542	7.13789	7.95517	6.66637	7.86923	8.05249	6.71263	7.43454	7.8712	6.16177	9.30041	9.94942	8.48736	7.93869	7.82909	8.61083	9.74259	7.0574	11.8507	7.271	8.86075	3.48261	8.03654	12.0365	12.2654	7.61921	9.55473	8.59587	6.93446	5.98721	12.0114	9.63495	9.46781	6.25731	6.89207	8.6751
NANS	6.08261	7.54882	7.36724	10.0264	10.4585	8.05276	9.54758	7.13947	9.61192	7.4647	7.38354	11.8733	8.98018	10.0921	10.2697	8.94396	9.52337	7.34598	6.74006	7.07553	6.8529	8.38605	9.16057	7.76745	12.5569	9.57336	10.6515	7.52085	5.51363	10.2763	9.10292	7.53081	7.80267	8.13424	9.69524	10.3415	6.81641	9.49925	10.0491	8.69189	11.2102	7.77858	9.01257	5.51532	8.34547	8.53093	11.2161	8.49513	11.1454
CA8	0.259086	-0.00961806	0.49159	0.451249	2.08504	-0.158006	0.874412	1.09847	-0.182037	-0.629518	-0.35077	4.01175	0.905015	0.368323	2.85958	-0.162844	0.349064	0.715974	2.28209	0.513432	0.338205	0.106756	-0.355208	-0.381612	1.96562	2.86144	-0.0438557	-0.261263	3.77031	0.178649	0.414059	0.709529	0.406639	2.73448	0.680448	0.566193	3.77111	2.71673	-0.0389724	-0.197028	0.526491	0.0573948	0.133861	0.080335	-0.275068	0.554447	-0.00905951	0.125078	0.994922
AGXT2	0.837484	0.553989	0.616325	1.24108	1.37038	0.916387	0.375717	0.700998	1.49009	1.54764	0.618328	0.742811	0.942415	0.826796	0.75521	0.381509	1.08667	0.789301	0.797871	1.10768	1.20114	0.988428	0.907907	0.70356	0.575177	0.9874	0.525568	0.797022	1.0639	0.198511	0.907746	0.742777	1.27986	0.771773	0.426221	0.883175	1.11862	0.842196	0.722943	0.918687	0.932707	1.02845	0.771231	0.856799	0.735622	0.75052	0.418474	0.434966	0.651174
INPP5B	3.98708	3.65532	2.04593	2.61605	5.56315	4.12195	2.29642	3.06465	2.19597	1.22768	2.31998	4.59042	3.58345	3.59948	2.55305	2.94432	3.69679	4.58309	3.04738	4.26224	2.91719	3.29712	2.8448	2.68482	2.84187	4.37963	3.28921	1.74212	-1.11063	2.68089	3.45034	2.8698	4.96474	4.26995	1.1878	3.76532	1.23937	2.96162	4.70489	2.02303	3.94691	3.18374	2.84259	1.3346	1.54243	3.06507	2.27924	3.73577	3.95212
CDIPT	20.6286	18.2579	17.5682	19.3009	16.7416	20.0894	22.0771	21.0595	18.3856	20.2483	19.9698	19.8616	17.8155	16.9001	18.594	22.3338	16.6692	20.2121	18.8803	19.6845	19.4004	19.8064	19.9075	19.9588	18.8187	20.2865	19.9829	20.6255	18.8147	23.7946	17.863	18.5144	19.3083	19.5846	18.2123	19.1491	20.1993	17.0051	16.052	17.842	19.3971	19.0808	15.6028	19.1457	21.1956	19.7221	17.6411	16.1941	19.1016
CERK	11.369	6.90706	7.75757	10.4942	6.08323	7.5186	5.83344	8.53485	7.67156	7.41825	12.4988	7.58127	11.1763	5.74796	11.48	7.54604	9.30341	7.84289	9.98439	11.4803	6.83813	8.79462	5.78131	8.7623	6.19373	7.88023	9.22143	7.11707	6.93898	10.1732	10.5763	8.75273	7.82055	8.55521	8.56988	7.31903	11.4267	6.32189	7.23506	7.37903	4.98609	8.79615	6.74254	10.5206	7.41831	9.83451	2.982	10.0028	11.6436
AMPD1	0.922678	0.514914	0.737344	2.81288	2.08706	0.649066	1.02108	1.91961	0.491108	0.704448	1.17162	2.55737	1.24426	1.11504	1.24433	1.30812	1.33102	1.25034	1.04678	0.820803	1.47598	1.85285	1.12692	1.21994	1.45361	1.79835	2.13497	1.58739	0.748537	0.568056	2.05955	2.36887	2.53292	1.0682	0.983985	1.96741	1.48631	1.02285	1.29756	1.46493	0.23358	1.10647	1.02085	0.691456	0.874719	0.96837	0.753466	2.33487	1.64465
TXNDC12	19.8328	16.5707	19.3358	19.1825	15.6553	17.8478	18.8464	16.4593	18.5331	15.1216	15.6551	18.2063	18.4894	18.602	16.0728	19.0912	18.0691	15.8422	17.9006	16.854	15.8864	16.9821	18.7184	19.3701	18.4027	17.5647	17.8128	19.0022	22.8236	18.6107	17.674	17.5173	13.0586	16.1809	16.2649	17.4434	15.5414	17.0369	17.8965	16.5562	17.1572	17.9446	18.3663	15.7518	17.1242	18.8535	17.5347	15.8456	18.5792
GSTT2	1.11302	1.0842	0.931942	1.09044	1.19359	1.18657	0.764247	1.03346	0.736408	0.866376	1.39493	0.846136	1.49668	1.06408	0.861728	0.938696	0.958537	1.12633	1.1911	1.00991	0.984583	1.08669	1.17658	0.879014	0.924401	1.02699	1.29738	1.08908	1.05932	1.24755	0.899734	1.16448	1.01049	1.26646	0.788376	1.02932	1.25802	0.776589	1.44102	1.29742	1.21126	1.06751	0.986467	1.09597	1.18747	0.915229	0.931699	0.820401	0.954798
DNMT1	5.71765	8.07526	6.41571	5.69697	1.42249	5.93864	8.42335	5.36301	7.86788	4.85505	9.06698	4.67323	7.46721	7.07148	6.71523	8.94613	6.4003	4.54888	3.8194	10.2484	4.25531	7.37938	8.63013	8.40765	5.4896	7.67307	6.64946	5.43545	6.07291	2.99654	5.78425	1.0678	4.80935	4.64046	7.97288	6.79043	3.70474	10.2261	10.1491	6.16921	5.81787	7.45827	6.45405	3.75378	8.61606	3.46219	8.52809	6.63873	5.44806
PFKFB2	10.093	4.69053	6.70926	0.783278	10.9215	6.24661	3.28191	8.18773	10.0439	5.99128	3.78882	7.50239	4.11126	4.03561	2.81136	1.64173	2.49655	6.49139	2.77643	3.48509	2.86191	2.50917	5.61062	5.19573	9.18881	1.81964	4.5755	4.06367	4.07621	8.75113	2.78549	6.89871	10.3526	6.11793	3.83753	4.6306	6.21257	2.38824	1.59058	1.81794	3.16719	1.77818	1.42391	8.49954	5.67269	7.85677	4.47755	3.26328	5.05454
CYP2B6	1.43059	-1.58018	3.76377	7.04217	8.32253	2.5335	-2.54503	-0.107514	-0.449798	-0.747584	-0.81079	3.44487	-1.25465	-3.29027	-0.696833	4.61287	3.4946	-1.1053	0.867192	0.227325	-0.187464	-0.0554103	4.31228	0.761542	9.59749	3.29739	4.57139	0.873919	0.990503	1.55659	2.28824	4.50159	6.20917	6.18813	-1.73419	6.54709	8.00038	10.8003	2.17324	-1.36175	3.77395	-0.489794	1.66455	-1.05731	-0.832444	5.6994	-1.43677	3.59075	0.536815
ACAT1	10.8036	5.50119	8.59569	7.16715	13.9023	9.08609	5.67167	9.99175	6.29852	5.82201	6.81475	9.91577	8.66418	10.1376	7.65749	6.05668	7.66002	10.7334	7.94908	5.19984	8.25546	5.54271	6.80029	6.96664	6.21142	9.26594	6.87993	6.14739	4.15539	10.2249	6.12188	11.396	8.09374	7.46392	5.03866	7.6504	11.9358	10.4607	14.303	6.79588	9.75012	3.62134	5.88683	5.59559	8.1584	8.56638	8.51759	8.21629	6.39667
GBE1	4.10762	6.17582	4.33953	5.43803	3.75006	4.34387	3.50582	5.92965	9.77078	7.10177	6.4656	4.25567	8.67838	7.9745	6.86803	3.79993	6.27788	6.13576	7.91655	4.9872	11.297	4.42737	8.05294	4.34156	3.50534	5.81658	6.64673	7.28309	4.47365	5.77378	7.116	5.51111	3.47209	4.55721	3.60503	6.83114	5.0509	3.35311	4.36866	6.84654	8.42171	6.00278	10.0746	4.73769	1.45264	5.4541	5.50625	5.88616	5.68047
PFKFB4	1.1488	3.38205	2.67647	2.34203	0.985553	1.11265	1.71281	1.6264	3.614	5.61144	4.39561	0.113189	5.17577	7.03225	4.26112	1.6458	5.05792	2.18962	1.83169	3.37737	4.50213	1.04646	5.31394	0.645221	1.59275	-0.323983	2.10535	1.18992	2.40518	0.805691	2.39841	-0.465148	0.807348	-0.329512	5.70119	3.19514	1.26231	2.99524	3.76743	4.10275	2.13848	4.74803	4.70499	-0.0625791	-0.365717	2.71745	5.57177	3.7288	3.14802
PGS1	6.28967	6.19074	6.60885	6.3724	4.86896	7.12093	5.06338	8.90118	5.57269	2.73882	6.23775	4.63289	4.03896	4.78002	7.88785	5.66555	7.15941	10.231	6.79519	7.82859	3.82318	5.38266	5.06346	3.84251	9.44542	6.79301	6.13631	5.09183	5.73036	5.85065	6.30999	7.84236	6.54801	7.30326	8.2783	5.72597	6.92101	8.07317	6.45998	5.98872	7.38377	5.17085	5.22569	5.91639	5.9595	6.94239	5.73083	7.08575	6.35596
FBP1	59.0655	56.0747	57.3887	45.1309	58.5095	66.224	35.3247	66.4927	28.9988	30.12	48.8849	59.5486	51.9959	47.5555	40.1871	52.4806	50.7809	67.874	60.5442	47.97	50.5073	45.6497	64.0757	45.0836	52.8621	63.1608	61.7045	53.8156	46.8685	59.3965	45.8778	55.6848	58.0396	62.432	56.9015	64.2573	59.7449	57.7309	51.936	54.864	64.5528	50.1583	44.9944	25.35	32.5839	62.3158	49.4613	58.8745	50.8618
GSTK1	21.3464	15.7189	19.8883	17.7212	22.4586	21.6603	15.8901	19.2692	17.129	11.5118	15.6244	18.6894	19.1595	23.1562	20.7088	19.4898	20.4012	21.3993	19.6261	16.2341	20.5592	17.424	19.0542	19.4258	21.4528	20.3066	21.8589	22.297	20.1883	20.6978	19.0137	17.887	16.1012	20.9406	17.6251	20.8932	12.7433	14.9312	15.7726	19.2884	19.2902	17.3842	17.0013	13.2127	15.0503	19.037	21.0083	21.8809	20.2452
ACER1	0.783232	0.949752	0.813423	0.834834	0.916516	0.803416	0.830567	0.853875	0.916525	1.02084	0.804546	0.770107	0.817101	0.88069	0.7737	0.77852	0.8421	0.93333	0.825958	0.81559	0.890642	0.924683	0.877184	0.804602	0.84683	0.805307	0.727228	0.757359	0.84589	0.835504	0.852854	0.7894	0.799715	0.709035	0.837926	0.832631	0.857648	0.815992	0.831702	0.919087	0.759912	0.902314	0.857786	0.946022	0.913737	0.854478	0.824486	0.821699	0.83173
NT5C	5.82434	9.69608	12.3161	10.3077	10.7052	5.58442	12.5841	7.38743	13.5302	12.0415	14.041	10.2384	11.4845	13.5682	13.2987	12.9739	10.8565	8.14456	10.1208	10.1094	8.53424	10.2464	12.1697	8.93464	9.95924	7.58474	8.71785	10.745	12.0035	8.22286	9.8226	10.4276	8.69169	7.18585	14.5348	9.8939	11.3087	12.5827	11.0274	12.4303	8.76684	12.2494	10.1721	4.3406	13.7178	7.90242	10.0422	9.66786	8.25094
AKR1C1	18.8095	9.07092	17.873	34.8664	42.4613	14.4388	34.4447	16.3429	16.6552	23.7922	37.0439	16.9013	26.8837	6.08864	30.3448	36.746	9.88878	13.8615	33.1604	27.3521	11.3695	21.0398	11.8891	24.3842	30.0231	18.6892	9.77928	30.8004	37.2212	26.0743	17.4277	37.9064	24.7889	10.298	40.0404	9.23594	36.4631	35.5686	9.8056	33.6862	11.3147	23.8792	18.3729	33.3178	38.9292	24.203	29.076	14.77	10.7002
POLE3	14.4089	19.2621	16.9897	15.5928	15.1847	16.1192	21.0636	15.221	22.8604	20.528	22.2804	18.4893	16.5016	18.8927	24.3923	21.0615	17.2836	14.6042	15.5723	18.6239	16.2319	20.9678	19.1531	16.7755	14.8289	16.7498	19.5257	15.9746	13.9198	17.0759	18.3315	13.4807	14.4311	15.5945	19.9539	19.802	13.5735	18.3243	19.0574	20.8669	16.0383	21.4219	16.6519	23.4647	23.3822	13.2233	15.4962	16.5748	18.3537
DAO	0.826798	0.787744	0.873854	0.904827	0.969239	0.857878	0.847679	0.834141	0.914444	0.87135	0.816752	0.796833	0.882739	0.867912	0.871253	0.772204	0.866498	0.81644	0.83345	0.885527	0.87406	0.847495	0.794741	0.858565	0.84733	0.696224	0.825174	0.799558	0.861919	0.817516	0.835222	0.833428	0.835327	0.833063	0.814096	0.893836	0.870663	0.798852	0.835124	0.793242	0.750572	0.785033	0.825697	0.786772	0.821323	0.78903	0.809915	0.810812	0.796259
PIK3CA	2.44487	2.51146	2.28885	2.86616	1.9257	2.77431	3.44643	3.62368	4.56533	3.48032	9.31736	2.1946	2.36788	3.41917	5.52448	3.81098	1.82403	2.98659	3.04251	4.56592	2.32742	4.01089	3.15658	3.12238	3.04249	2.62471	3.09107	3.04401	2.94211	2.34907	2.15528	1.99417	2.39702	2.24428	3.04864	2.86121	1.60111	4.07103	1.40701	3.61802	2.53854	7.09649	3.98623	5.05071	8.09712	2.91357	4.4661	1.73116	2.94865
BLVRA	33.3411	27.9862	37.6076	26.9359	33.4308	32.5595	28.8545	29.6906	27.7094	28.4773	27.6434	28.9635	30.9688	32.0691	36.1571	28.1176	26.3366	29.88	30.7063	27.3348	30.5626	24.9672	28.8233	28.0828	28.1672	26.766	30.5167	30.0248	30.0558	28.4325	28.3581	32.8075	30.5054	33.7916	31.5182	30.3938	30.2015	30.241	29.2355	27.0581	30.4142	26.8425	28.3859	30.2305	31.3491	29.061	27.2295	30.4091	28.6143
MTMR7	-0.25884	-0.765701	0.134628	-0.0255373	2.03272	-0.262932	-0.611542	-0.505101	-0.582879	-0.430803	-0.500086	-1.16928	-0.114498	0.640004	-0.0267554	-0.704601	-0.688443	-0.592009	-1.15394	-0.218721	-0.474211	-1.63512	-0.39582	0.131583	0.11084	-0.437869	-0.27898	0.00744024	0.989614	0.433629	-0.235779	-0.0183148	-0.291282	-1.10962	0.287814	0.0622412	2.20863	0.0398765	11.5887	-0.811069	-0.263282	-1.26719	-0.660601	-0.156051	0.181862	-0.160455	-0.0194093	-0.788693	1.64149
PAICS	8.90051	11.7267	16.2066	8.57621	10.3052	5.05754	14.5306	3.44308	16.4851	14.5944	11.0838	14.5187	12.3425	17.0081	16.4536	11.6148	11.6611	1.50769	8.6329	15.0484	10.3171	10.0301	12.5824	14.8985	9.03504	6.54376	12.1954	10.2059	11.999	11.4143	10.0212	11.9569	9.08191	6.60656	10.737	12.0469	12.273	9.87755	14.9178	13.4356	8.84332	14.5265	14.164	19.3355	16.3513	5.34424	8.43897	8.48324	10.7279
POLR1D	6.08473	5.77992	7.31719	6.06424	8.44538	5.19376	14.0147	8.64352	8.67868	7.42574	9.30279	13.4159	7.94502	8.1424	10.5565	8.33466	7.24233	7.66951	8.67058	8.92114	10.0985	8.42307	6.55697	9.85943	7.70452	9.04041	8.45056	6.93994	6.94964	10.6972	8.449	11.6728	9.6427	8.37371	11.0117	7.01736	7.07779	7.89858	9.23951	9.09923	8.8882	12.1019	10.2276	12.6359	8.67867	6.46843	4.93446	7.18965	7.13106
PTGS1	6.66929	3.39258	3.85501	4.66154	-0.139193	5.9221	1.82809	6.89389	10.2879	11.2912	3.26585	4.97189	3.4228	2.86607	2.8161	6.49094	5.06389	7.25726	5.1937	1.64286	6.74477	2.77766	7.53356	1.61369	3.36357	7.4026	8.95763	5.31262	1.38677	5.11514	6.91398	3.17675	3.75277	6.3444	3.82774	6.33361	3.24768	3.58333	3.90837	5.92305	7.68892	3.27829	6.6719	4.16705	1.75258	4.01007	2.33393	6.40349	4.6773
POLA2	1.6195	2.1805	3.90054	2.73001	3.57753	2.1419	4.39372	1.11203	4.3644	3.19172	4.27599	2.23607	4.51308	4.91464	2.51673	1.82857	3.7105	1.81321	2.36771	3.17274	3.02405	3.89085	1.92278	4.27437	3.43568	2.32812	2.58768	1.98624	3.50351	1.80446	3.74786	2.02603	2.87526	1.75008	3.29743	3.66788	1.26608	4.17933	3.891	4.0895	3.2052	2.98017	3.85727	4.16119	5.68213	3.85444	3.51295	2.63597	3.23906
GBA3	0.780868	0.618212	1.70275	1.09099	0.853117	0.756549	0.596179	1.17662	0.845558	3.19184	0.622307	0.700953	2.28343	0.874152	3.28357	0.904146	0.968219	1.20718	0.662241	0.790539	1.02076	0.86438	0.852604	2.9042	0.853641	0.680819	0.956098	0.812744	0.975368	0.727595	0.841166	0.795175	0.899732	0.700948	0.590931	1.01795	0.766228	1.2417	0.76659	0.920244	0.772794	0.639584	0.753872	0.892881	0.799155	0.986371	0.77885	0.906267	1.08425
NAT1	3.77261	4.69912	3.07138	2.53942	1.83893	2.80014	3.50364	3.74884	3.16652	3.66921	3.19975	3.72264	2.94822	1.89647	2.55994	3.18496	4.39697	2.81023	4.02712	2.12984	2.48807	2.73681	2.88318	3.50455	2.88725	3.15829	4.01882	3.68559	2.41899	3.47953	3.77864	3.71708	2.44578	3.28113	1.8086	4.03071	3.636	3.58803	3.63454	2.82798	3.70731	2.49184	3.09145	2.30355	2.74308	2.69019	3.7482	3.82241	3.43274
SGPP1	10.2942	9.595	6.90203	8.20102	7.15241	11.0601	6.16947	8.89843	17.5969	9.01498	6.23444	11.4023	8.906	9.1075	6.14668	11.4274	6.51058	8.75638	12.7006	4.50518	12.9465	5.59328	13.2121	9.75704	4.23069	11.8568	12.9635	13.0672	9.29005	11.2993	9.53571	11.0878	12.1545	7.36438	5.60021	14.2425	14.1919	8.33463	10.532	7.51192	12.0719	6.66481	11.3916	0.138385	-1.84353	7.339	7.73746	10.6908	15.6935
PFKFB3	25.9526	20.6943	22.1465	25.0643	7.12089	25.1496	21.0756	23.166	20.4226	22.3665	25.7228	21.9264	23.846	25.3411	21.1768	29.6479	19.0997	24.7662	21.8029	21.3586	25.5013	19.0133	25.3105	19.086	17.6954	21.6851	28.3353	21.7205	20.0387	22.1777	18.891	15.0544	24.6063	27.382	28.082	24.6827	17.2704	20.0727	18.9702	23.2514	28.3496	26.4635	25.9393	14.5557	18.2203	23.3141	23.5566	17.6565	22.4699
GPD1	0.888928	2.65039	1.52269	2.00537	5.34364	6.77851	-0.485321	9.92293	0.470936	0.918597	0.702155	7.48058	1.94297	0.894363	1.51734	1.76592	2.807	13.2061	5.96257	3.84294	2.20308	3.06547	3.90689	1.29265	3.26247	3.01054	1.95188	1.69149	2.84779	1.85035	0.863102	3.28881	5.74343	1.74031	1.63447	5.0338	3.11541	3.62621	1.54899	2.88461	5.03895	0.868044	1.25566	2.00326	3.04535	9.73353	1.38596	2.27279	2.84871
RRM2B	13.2682	9.92197	7.19727	10.5604	17.3598	15.5856	3.92283	10.4383	10.02	5.49353	9.02549	7.57753	9.01952	8.56872	5.24255	8.63929	8.72719	11.0465	13.7771	8.61722	12.8883	6.73165	10.2601	7.23553	4.94983	9.78213	11.8076	6.46345	7.8592	6.22104	7.60951	13.9434	12.1376	12.2026	5.14459	8.73559	14.2744	7.10286	3.01499	7.52294	15.2036	5.15394	7.07422	1.7929	7.11911	9.55762	7.31896	8.61033	6.01674
NME5	0.277832	1.69327	4.04915	1.21745	4.03935	4.13619	-0.295245	4.499	-0.0640149	-0.131352	0.398848	4.74989	1.52493	0.868369	0.0564219	0.712382	2.07461	2.35179	2.1128	1.7559	3.9447	2.91276	0.592624	0.880572	3.0455	3.43984	2.02687	3.37454	0.704173	2.43533	1.79031	1.23926	1.55674	2.00498	0.533805	3.54939	2.78771	1.18921	2.86738	1.02726	4.31362	-0.441854	0.186578	0.179147	0.0404057	1.54424	3.50454	4.2591	0.722631
SUCLA2	5.34436	7.32816	2.1962	4.6184	6.67175	4.76469	9.84798	7.24752	6.36411	8.1925	5.77747	7.50936	5.73593	5.59943	6.53663	5.65745	5.15811	6.71033	6.99067	5.87561	9.03508	6.39639	4.0131	6.68534	8.19455	7.32081	6.83096	6.83352	6.3669	6.8719	8.02447	8.48968	6.21432	5.93117	6.34956	5.27479	6.4732	6.3947	4.19329	7.35317	6.49883	7.66746	4.13737	8.52667	7.58683	4.79712	3.46754	7.51144	4.14297
SORD	4.61782	3.31459	2.35893	5.83858	3.8642	0.274288	3.41853	0.534136	5.95551	2.07045	1.68262	3.98541	2.36997	2.41057	2.13123	4.71104	1.92572	-0.677081	2.36769	4.80761	1.17701	3.64355	1.90244	4.59116	4.02045	3.84362	1.0822	2.35582	3.87865	2.59731	2.4941	4.02396	-0.161709	2.8885	5.74187	1.19219	4.56151	4.29868	3.9309	1.92331	2.78188	2.4294	1.14508	4.57262	5.87128	5.5152	2.09998	2.04377	1.83064
ADCY10	0.711071	0.727888	0.795699	0.842107	0.773512	0.697269	0.76566	0.716245	0.78335	0.794631	0.849542	0.751468	0.736127	0.798595	0.953903	0.74596	0.776657	0.726909	0.754085	0.863234	0.755047	0.738208	0.722559	0.84489	0.762336	0.771926	0.700114	0.690068	0.736493	0.758327	0.817702	0.756796	0.767729	0.742873	1.20291	0.794348	0.758317	0.822356	0.780546	0.916456	0.759473	0.916498	0.795799	1.02202	0.915742	0.735859	0.757766	0.734221	0.741922
HEXB	23.0874	20.4353	22.7694	20.6378	25.9512	23.3835	16.9094	23.2837	16.7205	18.0938	19.9647	21.7617	21.2466	22.345	21.0084	23.0768	21.8013	25.3471	24.4942	19.9094	23.6888	17.4107	26.0077	19.9545	25.2973	21.1324	23.7466	20.5428	21.3323	23.5671	21.643	19.9438	19.1925	20.5567	20.1081	24.3168	22.5449	22.4569	23.6762	22.5442	23.5352	21.3316	20.9047	17.901	18.9414	23.4144	21.2638	22.7581	22.6988
ENPP3	10.3125	2.64864	10.3568	2.68222	1.62474	9.79692	3.83934	2.46386	0.275604	0.385509	0.503437	14.7562	2.03138	0.187472	0.727383	0.562876	1.22366	2.76056	3.86047	1.42618	8.03164	1.65009	0.136603	1.05999	1.67473	2.5511	0.495391	2.18923	7.01162	8.7423	1.49954	1.44698	8.14792	4.34916	0.696458	1.41212	12.6322	13.0316	1.17066	0.79352	3.86193	-0.121278	1.01269	0.989596	1.67138	2.86659	10.6788	9.16398	-0.134134
ASMT	0.766365	0.831378	1.03875	1.0145	1.22127	0.672752	0.881431	0.66394	1.15399	0.856348	0.754535	0.84183	0.915236	0.808074	0.903325	0.961264	0.987882	0.790962	0.897056	0.970754	1.03335	0.910915	0.958302	0.904682	0.849992	0.719514	0.980931	0.650408	1.05774	0.967495	0.832566	0.923177	0.924735	0.851321	0.816101	0.971814	1.1048	0.705378	1.06256	0.765299	0.789981	0.854458	0.972344	1.00512	0.68728	0.815339	0.886671	0.863694	1.02223
AANAT	0.595388	0.921636	0.750227	0.94709	1.24365	0.885575	0.881478	0.800207	0.686058	0.672156	1.15971	0.933197	0.877596	1.03301	1.01012	0.957862	0.853323	0.79608	1.0052	0.853269	1.19292	1.30229	0.850382	0.644808	0.659523	0.925989	1.00094	0.776008	0.910595	0.737051	1.16518	0.623673	1.06501	1.01373	0.774728	1.00421	1.52301	0.71152	0.595388	0.747009	0.489974	0.789847	0.841112	0.864511	0.806006	0.66086	0.780769	0.595716	1.0153
COX10	2.62495	3.62849	5.12013	2.98442	3.73659	1.37615	4.58048	3.20351	4.15514	4.36268	2.75763	5.6521	3.52013	3.26497	4.47875	4.56774	1.56418	1.81761	3.78129	2.73306	2.52705	3.85591	3.5109	5.49857	3.82882	4.95517	4.0949	3.86	4.0624	2.56772	3.74643	4.85545	3.14389	3.42237	3.31739	3.72139	5.22586	5.67304	4.95218	2.64869	2.15474	3.0807	5.60609	4.49819	6.18094	2.05467	1.8554	2.21397	3.57587
LPCAT4	1.44445	3.45771	3.38385	5.69024	5.401	2.26455	6.30273	3.35057	6.56684	5.51993	3.87955	3.26615	2.2779	6.27775	3.58723	6.48879	7.24852	4.60859	7.11983	6.18405	2.57288	7.83397	6.12591	6.89905	7.69611	5.18269	4.08141	3.32114	9.68002	5.81378	6.86168	5.64653	3.48388	5.50424	10.3658	4.02123	2.55577	3.10486	0.972697	5.02178	4.31692	6.58841	6.4548	10.7637	8.55611	6.82031	6.10662	3.87763	5.94232
SMPD3	2.02669	1.42805	0.301587	1.16811	1.09383	0.628174	1.11523	2.04317	0.869613	2.18452	0.894905	0.371299	0.69553	1.27531	0.433349	1.21164	0.403333	1.50357	0.0629913	0.274897	0.690927	2.06484	0.0509567	0.369943	3.13839	0.454491	1.60255	2.02088	2.14649	2.86307	0.091062	3.246	1.43555	0.0336831	0.466361	2.38275	-0.234314	1.90499	1.73335	-0.459062	1.21647	0.188485	0.579732	0.851575	-0.066171	0.939654	1.13279	1.18955	1.73361
GPD1L	19.1947	16.2725	17.4459	11.733	20.2432	19.6017	13.0117	19.3334	2.65829	3.48512	6.29811	17.0669	8.48382	4.12808	5.98208	11.0923	15.0173	19.3241	15.6907	9.26472	9.31859	11.7473	15.4786	11.528	13.5887	17.2759	15.9841	9.13533	8.07824	13.1042	6.16609	18.1967	21.3529	20.6932	4.63613	12.8082	13.2939	16.2504	10.0785	7.45975	17.9042	8.46043	4.78856	8.18995	10.5699	18.1303	11.7695	14.4949	14.7046
PDE6A	0.721164	0.909594	0.874756	0.901425	1.08014	0.759035	0.807636	0.915032	0.881459	0.756438	0.815598	0.757662	0.91514	0.845221	0.749376	0.770189	0.785008	1.02586	0.903245	0.94175	0.97525	1.0054	0.842682	0.848986	0.891856	0.773136	0.803923	0.870752	0.979607	0.652059	0.851298	0.836203	0.937685	0.662402	0.901428	1.08111	0.824074	1.24963	0.95344	0.881337	0.837927	0.801415	0.747388	0.895882	0.975442	0.916497	0.832319	0.742433	0.912525
BST1	3.00235	3.0574	3.77427	3.32631	-0.75816	4.24296	-0.174257	6.63991	0.179184	-2.12254	-0.497277	3.45177	3.17821	4.99587	1.25847	3.94017	3.83601	6.88092	5.12773	1.36955	1.96404	2.02118	5.58978	1.30549	12.1195	1.89331	7.55094	3.72122	5.9757	3.46915	6.16257	2.88701	3.00453	4.03978	2.04128	6.76037	3.32748	7.13626	5.13734	4.36799	4.67827	2.64737	1.71533	0.161733	1.08924	3.7471	-1.04977	5.03749	6.42381
ADH4	1.00531	1.22056	1.4548	1.42844	1.48491	0.980766	0.953927	1.28374	1.26078	1.4805	0.663987	0.483931	1.21698	3.24678	0.739275	1.22797	1.76244	1.06144	0.512518	1.83066	0.542951	-0.0554068	0.753218	1.09931	12.049	1.49027	1.08202	0.380716	2.89471	1.28899	0.704488	1.47352	0.554573	1.80956	2.49229	0.982229	0.140004	0.655767	2.17744	0.945971	0.0353574	0.871955	0.165548	1.29584	-0.155302	1.55669	0.908525	0.770327	0.797639
ADH5	21.8092	18.2581	20.1237	20.5953	16.3987	18.2714	23.8277	20.5775	17.0484	19.4638	17.3889	22.4103	15.9287	16.2599	22.8243	18.5878	16.836	19.9602	18.617	18.4079	17.027	20.3609	16.2271	23.3079	21.7908	20.5655	18.2363	22.2836	19.1982	21.1865	19.8721	18.3673	17.7644	18.8277	18.6389	18.7311	22.4	18.2962	16.8447	19.586	18.2773	19.1255	18.3708	18.0536	25.1958	20.4286	16.8482	20.7183	17.071
POLR2D	5.48129	10.0452	7.85276	5.08123	2.12933	6.11582	9.46299	2.37432	8.13983	5.35381	8.87687	5.8046	7.35375	6.8392	9.04845	8.77481	6.36113	2.04645	4.39689	8.74278	4.45914	6.56135	7.20932	6.30705	5.6757	3.52655	5.12569	5.02812	8.55168	5.59968	5.94598	6.18091	7.65126	6.35809	6.8937	5.98146	5.2035	8.72019	7.53389	7.02015	7.70378	7.88437	7.04863	10.5433	9.41151	3.49824	5.81523	4.18654	7.11368
POLR3D	3.1193	4.35225	3.72402	3.24604	0.754796	0.528506	3.35626	2.1552	2.83472	4.24455	4.27042	4.28782	6.22495	3.53251	3.79881	2.72127	3.30684	1.19832	3.75982	3.62222	2.31772	4.00987	2.67266	5.45412	3.96826	2.19625	4.08398	3.49929	4.49261	3.44859	6.63212	3.92252	2.14673	2.06506	2.51579	5.40708	4.63245	4.99745	4.72676	2.99511	3.0729	2.04572	4.50357	4.43176	3.90286	1.74103	0.500197	2.96569	5.65191
PCYT2	2.4896	5.20025	9.3323	4.41094	5.14772	1.87256	7.05033	1.84159	4.86998	3.26406	4.89383	3.80673	5.68282	5.05846	4.39423	4.68143	4.43976	3.85366	6.42773	6.10731	4.20495	4.02171	5.94239	6.84607	10.712	4.3089	3.87038	3.4095	6.60378	4.02717	3.55931	7.49903	3.18075	2.32909	3.43712	4.86095	3.09856	6.0579	5.58502	3.57643	4.55802	4.68129	1.46061	6.8495	5.82848	4.48356	4.91121	5.67947	4.20286
CYP2C18	-0.772794	-0.11756	0.320944	0.543456	0.501764	0.59819	9.72461	0.248789	5.59972	7.30291	2.02841	0.763609	0.547445	0.738063	4.58226	0.171073	0.566196	0.266176	0.129205	4.34483	-0.563799	8.47137	0.597493	6.31584	3.83148	6.33565	0.744495	5.58619	5.38682	3.86381	0.669546	4.27907	4.12599	2.75317	4.18823	1.39702	1.19296	0.398954	-0.218762	5.63311	2.23189	3.8527	-0.296326	6.96446	8.28432	0.0700308	-0.439803	2.02064	5.5571
PRPS1	12.7097	11.1094	13.0931	12.6547	9.45977	12.1079	10.0064	9.90074	14.6944	11.1983	10.0065	12.782	11.3275	8.57664	14.181	15.1752	13.0311	9.6699	10.7939	12.4141	9.97107	11.863	12.9739	14.6064	9.80564	12.0079	15.8668	12.2645	7.67122	9.97371	13.915	11.5172	13.342	13.9023	12.1469	15.1354	12.6062	14.9821	17.1429	10.5834	12.4713	12.95	11.8939	11.4369	12.0466	9.58005	6.96059	13.3805	11.8876
OAT	27.9852	26.1964	24.6667	29.1122	31.6446	30.1454	32.2971	26.6444	27.7722	29.2741	24.1071	27.1432	26.3215	28.3379	26.9985	31.6875	28.1315	24.865	29.2344	26.2206	26.687	31.4962	26.745	28.1969	30.8025	28.0346	26.9738	28.075	27.4702	35.8212	27.2576	28.7937	21.5284	29.6413	25.1295	28.8261	33.6227	27.0379	29.8612	26.1019	28.5624	24.8519	25.9117	25.9783	29.9968	25.3693	21.8068	27.1567	25.747
ADCY9	9.05011	4.68397	8.35057	4.95703	7.28141	7.45882	5.41448	7.85541	6.40017	6.78793	4.67649	5.54413	5.22762	3.85593	3.03582	6.73255	1.60278	6.54884	5.66716	2.65718	2.20623	5.45591	4.85832	2.89027	3.19736	6.52192	5.01379	4.55408	1.48356	6.9427	3.47992	4.44348	7.44107	7.34044	4.81361	4.45194	5.85971	3.6759	3.24756	4.48318	6.04594	5.87814	4.36788	3.88829	5.43931	6.19342	4.89335	4.00173	3.99916
PDE5A	3.91465	3.23936	2.40457	4.14527	1.37533	6.16242	0.868351	5.68409	-0.0014176	1.1365	1.20099	5.09804	1.39428	1.74727	1.44803	1.18041	2.63327	5.08142	4.51596	1.92924	1.15855	2.67543	1.45366	1.84526	3.40147	4.3198	3.13429	3.29554	1.48305	4.17859	3.66534	2.81589	1.61772	3.01044	-0.54458	2.78885	2.50186	2.06553	1.53764	3.28183	1.29924	1.94352	2.37335	-0.182143	1.29108	3.71227	1.49535	5.70296	1.5034
PSPH	3.24946	0.126693	14.2775	8.91063	-0.510855	1.01268	12.4667	-1.42547	5.08205	3.78577	6.45885	-0.384934	7.03244	9.50888	11.7805	3.77096	8.93667	3.20282	-3.44856	10.764	5.29671	5.58464	0.775942	10.0889	6.20316	1.81367	5.48047	-0.200426	8.8686	-0.83089	4.62566	-1.68255	-0.158054	-4.66062	9.3997	7.01776	-1.64302	-2.34946	9.51825	8.01441	6.42941	5.63749	12.5615	7.44843	11.7573	0.31914	3.31378	6.39626	8.64716
LPGAT1	7.75871	9.95353	8.811	6.92226	5.43319	7.91747	5.97649	5.08686	9.3068	4.81181	7.71293	13.9867	6.58906	11.2558	7.89979	8.12651	6.51612	3.82408	8.21845	8.83151	10.277	5.14158	9.66752	9.21501	6.95441	6.70845	10.1328	9.91812	9.79077	11.6953	7.30315	10.8708	14.6075	10.7098	9.71469	8.74626	10.5157	10.4411	9.46214	8.5351	11.1607	6.00674	2.91586	9.37051	8.43602	8.55815	14.5885	7.16081	14.1065
PDHB	7.90627	10.4183	8.89649	7.37465	8.77259	8.01237	10.9721	9.8984	6.6117	8.10044	6.56969	11.4329	8.13045	6.89964	7.79647	9.91758	8.50552	8.71758	10.52	7.91502	9.23624	6.86478	9.68006	7.1694	8.48289	10.2874	9.62082	8.44116	7.91526	9.41009	9.51688	10.9883	7.51289	9.15844	4.83966	8.7162	8.58295	9.08512	10.5997	8.22479	9.36009	6.2839	8.22613	7.35481	6.46079	7.59424	5.69041	9.59437	10.0981
LIPG	1.2902	3.32411	2.19566	2.31109	-0.503943	0.831728	1.28549	1.07838	5.06915	0.92772	0.874452	2.64347	2.8117	5.2068	1.02722	2.17071	4.64191	0.765885	2.42965	1.84409	1.90386	0.516377	0.706869	-0.0751769	1.54888	0.392557	2.94995	3.11505	-0.0708721	1.45881	4.0993	0.895369	0.890822	-0.749692	1.82472	1.73682	1.09449	2.95914	0.994559	1.87091	-0.117916	1.60369	2.88943	0.0530448	-1.6672	1.45998	1.11858	2.38323	2.46102
ME3	4.1525	6.23729	6.07343	3.66433	4.69095	6.00149	2.51127	5.33549	0.414415	1.00407	0.742171	4.55062	2.38924	7.47842	-0.0128162	7.76679	4.32429	5.11599	5.26815	2.59921	6.694	2.62419	5.14941	2.08107	4.61448	4.70534	3.94284	5.49328	5.90483	3.03462	2.97731	5.59462	4.66459	3.1336	1.793	2.79459	5.68583	3.97972	3.72445	3.40349	4.18046	1.54089	3.59417	-0.857106	0.96006	3.52947	4.57466	5.47977	2.26535
HMBS	3.65678	7.32251	7.90173	4.8934	7.46202	2.12595	9.66239	0.996042	9.81278	6.12276	6.25454	5.06552	8.16836	8.1314	7.03105	8.1341	6.42607	1.64909	3.44772	6.94945	6.27819	4.47357	4.02164	8.09542	6.49915	2.94781	3.43133	4.95071	8.00551	6.03058	7.87752	7.37215	5.05363	1.91576	5.71779	5.30535	5.91707	11.6625	8.18479	6.23739	3.84854	3.56338	6.21646	8.70251	8.21137	-0.0421189	8.14367	3.18637	6.26888
ACSL1	23.4441	13.803	12.628	13.4513	18.4247	19.6547	15.762	20.8633	18.5906	19.8565	14.3423	17.692	15.6517	14.497	12.6687	19.9225	14.6317	21.7475	20.1461	19.0117	24.1922	20.7801	18.0475	16.9552	17.1066	14.4633	16.7257	15.0576	15.8614	16.6842	13.8166	14.8386	19.6762	15.893	16.4721	22.3136	21.2532	24.7565	17.8626	22.3184	25.6535	15.902	13.9209	17.2976	19.3754	19.3254	15.7235	19.41	18.621
LYPLA1	16.5654	19.1084	16.5582	14.8933	18.4081	15.4333	19.4792	12.7523	17.7929	16.413	16.291	17.8234	16.9472	18.6871	18.7915	18.3666	17.3131	13.0413	14.4873	15.9828	18.2676	16.5676	15.7845	17.5721	14.8583	13.9444	16.9705	16.4829	18.8297	15.9157	16.994	15.303	13.3607	13.1322	19.9364	15.9713	17.4149	18.1669	13.2723	17.2822	14.4534	16.2425	14.6807	18.5889	20.634	11.7204	13.0825	16.2196	14.0413
MMAB	2.99282	2.96249	2.27971	2.23261	4.35279	3.30739	3.61715	5.30871	4.54127	4.35399	4.92173	4.33035	3.65172	2.80786	5.36522	3.82943	1.49051	4.51951	2.28453	3.40236	4.01866	4.30689	2.25627	5.43876	3.36202	3.76815	2.66168	2.8366	2.88827	1.43396	1.88472	4.10406	2.92391	2.0316	6.1739	4.64547	2.94723	3.32882	4.31616	4.29017	3.62904	3.15854	2.59859	5.65726	5.3911	1.63356	4.17769	3.68698	1.2132
B4GALT1	50.5466	44.7301	39.4483	41.9674	46.321	44.2212	39.2004	46.6054	51.2973	43.6623	43.4153	42.9983	40.3835	48.3696	44.6462	45.4669	41.6107	47.7508	44.6203	42.7639	44.6801	48.3551	41.3665	41.2547	46.7591	47.0448	49.217	45.1171	41.4934	44.8167	42.3939	49.0139	50.3313	42.773	46.123	49.1469	42.9752	49.6298	41.1382	44.2869	45.3288	49.1091	47.1898	39.3714	51.66	43.3147	42.5159	49.0291	47.8534
EPHX1	112.277	103.903	98.6919	106.179	120.573	112.29	111.927	107.54	89.3907	97.7688	103.601	99.4253	100.99	86.7828	108.148	111.169	94.9475	107.115	113.321	101.306	107.306	100.593	107.809	101.474	111.95	98.4942	104.003	103.546	103.725	107.435	98.644	115.594	116.788	105.381	105.788	106.18	118.119	108.955	99.0012	101.962	107.514	95.0278	101.143	101.525	104.317	107.073	99.1063	94.8857	99.6357
CES2	9.37229	5.18514	7.86502	6.92886	8.93754	8.09625	11.3233	8.32113	14.5222	11.3535	5.81872	6.2806	4.83915	4.27318	7.94891	5.61192	3.95894	6.87386	7.16807	4.85422	5.40978	6.35856	4.73598	6.51594	5.16737	9.12219	6.68824	9.55831	4.06172	11.0638	4.61263	7.23128	8.86481	7.26747	5.97767	5.67409	8.81242	5.16895	3.58821	7.46594	7.29723	6.59282	9.69673	10.5212	5.48341	8.28113	5.86674	5.41722	4.59227
ALDH3A2	26.6702	14.4709	24.9448	23.0437	29.529	21.4178	25.6164	24.0792	13.4946	23.0729	22.6811	19.5556	19.7672	9.92273	31.78	23.1787	12.7295	22.5606	30.6446	17.9765	12.6648	24.426	14.7238	23.9055	16.195	18.3319	19.0861	24.0517	25.0194	25.5235	13.0079	29.8537	21.2314	28.3019	16.8035	21.6309	33.7388	23.7953	28.109	20.778	17.3446	19.4143	14.8874	23.43	28.6788	19.5924	18.1359	15.497	19.8775
CA2	19.338	9.14337	7.98701	5.56316	-8.22165	14.4353	16.0955	23.7135	31.5977	32.2534	20.7586	17.648	5.67743	23.083	7.39681	3.61437	5.95872	20.476	12.7246	2.88616	9.85431	19.2406	15.8718	8.2216	5.89192	27.5379	10.5819	9.79557	-6.0647	21.4573	19.8868	7.9216	23.6584	20.8539	33.1535	11.274	21.9332	6.2726	2.55797	14.4098	10.4653	11.8316	8.26032	13.6567	12.3225	17.7455	7.32133	11.8093	16.189
POLR2L	55.5001	54.1788	54.8035	49.6983	55.3733	51.8037	50.771	53.8159	47.8245	50.8955	49.4223	51.668	55.1775	50.3547	51.5556	52.6085	52.9724	52.4293	53.8571	55.8674	51.1794	49.7283	50.4512	52.0175	52.3635	52.8265	54.2713	50.6805	50.2632	55.8626	50.322	54.7044	57.0463	52.0643	47.7055	52.1125	52.0976	47.9289	53.3043	51.6029	55.5146	47.3872	48.7199	50.1016	49.607	51.7865	45.8966	53.3391	49.7256
GGT6	12.2387	-0.530308	9.96045	4.71322	12.4017	6.3531	7.53097	3.71043	1.69016	5.14718	0.614734	2.92225	3.43692	-0.306658	-0.464055	6.64499	0.864205	2.84592	4.59747	2.58082	1.45405	8.17045	-0.287508	7.06462	9.52531	10.4691	4.12325	5.45762	6.75139	0.299515	1.14607	4.10566	11.4883	11.8896	2.18013	0.897484	11.6306	7.86668	2.59554	3.17327	5.80904	4.36047	2.34235	10.8276	7.92254	0.970486	-1.43372	0.483919	1.52821
PLCZ1	1.31623	0.658758	0.777919	0.894736	0.7813	0.899629	0.732503	0.593528	0.910054	0.738213	0.853892	0.631898	0.810515	1.19994	0.762598	0.943819	1.23582	0.721546	0.628873	0.724068	0.584351	0.974737	1.50009	0.777708	0.972899	0.827583	0.501845	0.610793	0.595083	0.955589	0.744383	0.570337	0.84571	0.939469	0.71346	0.690355	0.668799	0.709923	0.561255	0.626234	0.834666	0.980565	0.916498	0.940213	1.20971	0.865348	0.803803	0.76346	0.843214
AK5	0.782738	0.765891	0.873972	0.905926	1.00667	0.699603	0.745369	0.62786	0.757198	0.933067	1.14726	0.760859	0.660481	0.847903	0.68666	0.752866	0.917203	0.760649	0.732014	0.658982	0.848744	0.77895	0.751772	0.811723	0.726762	0.744464	0.703274	0.673523	0.881345	0.949576	0.946349	0.749955	0.804205	0.744329	0.734854	0.696084	0.843991	0.946207	0.876788	0.845519	0.804206	0.690551	0.801343	0.77151	0.775851	0.730881	0.834106	0.994396	0.867038
HPD	0.673547	-0.400861	2.52736	1.73949	10.7755	2.52766	1.2366	-1.64001	-1.04661	0.452459	1.98374	1.10792	2.07913	5.05676	-0.264825	1.88125	0.671092	-1.0996	1.00217	0.399304	1.17533	1.81728	-0.277131	1.62187	1.88674	0.207247	0.661918	-0.222864	0.622608	0.713677	0.421051	2.21448	0.0879474	0.121278	-0.0110394	-0.748695	1.7855	1.84906	-1.85109	-0.327828	-1.22718	0.948137	1.22819	0.473695	0.885043	3.08383	1.51313	0.168761	2.11679
DGKE	0.664802	1.56266	0.579241	1.15402	0.422067	0.964962	1.50497	1.4021	0.828493	1.02336	2.2517	0.98016	1.4187	2.52234	1.59336	0.953121	1.7218	1.60796	1.10491	2.53249	0.573285	1.39503	1.62395	1.32019	0.657797	1.31546	0.712031	1.00657	1.05501	0.844228	0.824297	0.70929	0.885661	1.56167	1.42011	1.09224	0.740041	1.9953	1.17226	1.30815	1.01919	2.25798	0.781159	1.83788	2.80364	1.45716	2.18905	1.30464	1.13252
GALT	5.4576	4.22287	4.17005	3.6523	3.69073	4.22706	3.93298	4.24123	3.81332	2.39135	3.76979	4.18818	3.96538	3.84717	4.15529	4.43323	3.35197	5.92649	4.63766	2.78991	4.78797	3.86604	4.0107	3.33522	4.51924	5.08123	5.40904	3.66302	3.15853	3.84864	3.79823	3.06751	4.41067	4.37951	3.45821	4.05299	3.47074	2.69996	3.2516	2.91428	4.69862	2.82563	2.73011	2.29992	3.42418	4.36267	3.94155	4.27311	4.39807
UPP2	0.964046	0.729332	0.795445	0.893934	0.905923	0.723168	0.800904	0.564848	0.814118	0.98098	0.680864	0.833139	0.851832	0.917806	0.663588	0.608654	0.743665	0.49474	0.628825	0.777957	0.84854	0.786965	0.904563	0.800985	0.702428	0.796609	0.583316	0.662882	0.95818	0.655974	0.589252	0.658019	0.581657	0.769223	0.850921	0.872227	0.786	0.640996	0.679867	0.725818	0.801159	0.800326	0.926014	0.804902	0.91246	0.584579	0.746087	0.625935	0.766769
PCCB	3.27766	3.40144	6.04107	3.30678	6.71828	1.68684	6.69184	2.04374	4.85047	5.96136	6.35598	4.08201	7.08192	4.79036	3.98854	6.60101	5.30985	2.60364	4.03364	5.12556	1.65988	6.28704	2.95072	8.18608	5.8978	3.07086	2.23183	5.09316	5.19737	1.20035	3.41802	5.95336	2.37197	4.03946	4.48433	4.05103	4.87488	7.05211	3.3596	5.21421	1.80773	4.33401	1.77983	6.78287	7.88092	2.28551	6.17546	3.31735	2.83395
GPD2	6.61745	6.10223	8.05867	5.61922	5.7791	4.48279	14.6602	4.55675	8.07884	6.34464	8.69058	5.85185	7.51857	6.66279	11.5565	12.1389	7.50893	3.81496	5.78529	9.73111	7.82142	10.7886	6.02569	5.53949	6.91466	3.91358	5.89752	7.10824	8.02887	6.03742	5.68772	7.10012	6.12725	6.44563	12.2604	5.94491	8.58137	12.1698	4.98499	10.1425	7.46946	13.2377	9.57941	13.0841	14.7108	6.41052	5.43019	3.48028	6.49225
G6PD	32.6658	26.7273	35.6351	44.4889	33.2829	26.2704	37.4619	27.5282	28.3155	29.6902	38.0329	24.7326	34.7809	36.1794	39.7016	47.0656	31.017	30.6955	37.5185	36.3067	40.1211	27.9428	25.3913	34.9556	38.0159	28.3372	28.3093	39.5333	52.9726	28.5485	27.2144	42.8913	32.5776	27.473	42.7646	25.7944	44.5748	49.0437	33.1476	36.6063	37.0302	32.0565	35.0482	35.4345	41.9943	36.6134	37.8122	27.2064	23.458
GCAT	9.50941	6.41667	5.65614	4.93944	7.22521	3.72935	10.0708	1.9971	5.01703	6.12459	11.02	7.85049	13.8164	6.16857	8.30478	4.42985	9.21091	1.60685	6.70151	9.41264	5.52931	5.27218	2.24783	11.2463	7.58912	4.21794	8.65546	2.23732	1.18412	2.70364	6.07134	4.37551	6.87413	3.93676	3.74283	1.31318	6.89072	6.10613	4.45229	5.88953	4.94493	7.99936	10.8888	8.93669	6.88987	6.71089	0.895475	3.11886	7.01248
GOT1	8.43024	16.7998	16.2615	13.6573	19.2699	13.3422	22.0797	11.1869	15.8537	18.1971	16.7208	11.9085	14.828	20.3866	21.5158	12.983	13.6263	8.77009	23.4703	13.1534	9.92214	18.8602	18.2266	17.8343	17.7905	11.1627	12.3386	13.8437	12.4216	25.5332	12.9623	14.0234	17.0565	10.3288	17.0577	16.899	17.2295	17.1084	17.9477	15.4124	21.8367	14.3399	15.9569	19.0027	18.8421	12.3684	9.75312	14.8787	12.3696
GNMT	2.70324	0.935973	2.39078	0.756451	3.29971	1.89025	1.55779	2.19607	0.759775	0.866247	0.874289	1.17061	0.744421	0.640297	1.24316	1.71183	0.295417	2.2532	1.56838	1.25657	1.30206	1.53164	0.858736	1.16078	0.829388	0.927316	0.491339	0.90317	1.07854	0.33568	0.743519	1.26556	1.9933	2.29765	0.971691	1.31948	0.930294	1.89475	1.45044	0.561388	0.74479	0.523524	1.27575	1.22526	1.63674	1.23479	1.16737	1.29022	1.1013
DPYD	10.7716	14.2689	13.9995	10.0182	5.42933	13.4997	8.55616	11.1197	4.53896	7.41999	6.33792	12.6407	7.43302	12.8957	4.51516	10.4946	10.2799	11.199	9.23879	7.51604	13.9488	10.7487	10.568	7.28928	8.27291	11.01	22.4425	8.12218	8.9502	9.24538	10.6792	6.03138	12.8604	9.98285	6.55788	11.7191	8.19096	12.1816	8.85651	8.49515	15.6847	5.86501	9.14927	-0.61688	1.08944	12.0132	11.4332	13.1807	8.67559
INMT	25.0673	18.4926	17.3391	16.832	19.3013	30.4535	4.1763	34.6615	1.03474	-0.0896416	0.39864	21.909	9.90748	2.78781	-2.55066	5.26046	16.2791	35.9655	23.1837	13.3639	5.8933	12.4951	8.53336	9.60778	17.6619	30.1699	20.1872	20.9578	12.0073	24.3669	6.47545	18.9161	16.9767	24.0052	3.61029	18.1597	16.4748	8.09682	9.89225	16.0384	12.9028	1.11107	0.966203	-1.48941	3.7638	32.9564	4.77517	31.5164	20.7438
RETSAT	17.4918	13.1961	17.4827	13.1225	16.8771	14.3128	16.5438	13.7819	17.8315	6.71461	14.3032	15.5795	13.7174	15.8319	17.6855	14.5945	12.4686	15.3296	17.3372	10.7925	18.0369	14.9482	13.7641	17.3834	14.521	15.3517	14.2118	17.7918	15.8444	16.6984	13.8486	18.7	15.4747	13.3514	13.8015	15.507	18.9972	16.1223	13.871	10.3611	16.1106	16.1891	13.4509	12.5791	17.2673	15.2431	12.9595	15.7308	12.6028
DGAT1	18.1996	9.20791	8.44418	7.2708	18.8709	14.1935	10.6409	7.34169	12.6597	8.37459	10.3626	11.1588	12.9634	14.1037	8.85933	7.86694	8.13884	8.10576	12.5558	14.3234	15.3748	10.8734	11.5141	14.9941	13.8404	11.6	12.001	14.142	19.9797	18.5614	10.2868	17.1677	13.1069	12.9651	6.88356	11.8085	12.8455	11.0283	6.40956	8.50479	6.62876	8.11961	6.35496	11.9208	12.4852	10.6052	9.61452	8.06439	8.66486
ITPK1	7.51007	4.79088	6.06688	6.09783	9.78374	7.10495	6.14212	7.60105	4.03881	4.95215	7.8955	7.00423	7.88898	6.78779	5.9969	5.87712	5.65707	7.72365	8.22947	6.97541	7.87059	6.05016	7.62201	5.27823	7.31855	4.46728	6.8824	6.03903	7.51072	9.01955	5.35091	5.92796	9.8515	6.3419	7.64048	7.96727	8.14285	5.63742	5.57516	6.92867	7.86539	7.04875	6.45185	7.16713	7.12893	8.45878	7.04739	5.86065	7.07832
RDH8	0.934477	0.834834	0.870386	0.968253	0.93879	0.916661	0.830341	0.900925	0.968954	0.941798	0.87658	0.891345	0.895141	0.973637	0.877392	0.9182	0.803347	0.858363	0.847403	0.90678	0.91885	0.841278	0.803946	0.841772	0.901124	0.924142	0.900363	0.888192	0.873011	0.817317	0.910907	0.920415	0.819087	0.891255	0.917986	0.927013	0.904533	0.885748	0.844888	0.928245	0.862864	0.824888	0.905322	0.835531	0.874473	0.919967	0.974453	0.889948	0.85318
AMD1	10.0033	8.62976	7.60971	9.52113	6.31894	8.17074	12.9115	8.58789	12.1991	11.7695	8.8654	12.4046	10.2706	9.79858	8.2709	9.43405	8.41709	8.22407	7.49125	12.6673	11.4019	13.4222	8.82663	14.0329	7.63479	9.51149	9.82	9.99738	6.11993	7.41336	10.7862	8.95461	10.6474	9.72361	8.53343	9.82342	9.9809	7.30188	12.4889	9.20062	10.5157	5.57684	9.79494	12.3328	14.1595	7.65139	4.09801	7.87092	10.1516
DCTD	18.3988	15.6912	16.4131	15.3087	15.9222	16.7196	14.5397	15.2243	14.5145	15.4005	14.9848	20.3932	14.722	17.1977	16.4628	17.0588	12.6736	14.2726	16.3059	14.9611	17.355	18.8463	17.894	15.7707	14.772	19.2693	15.765	19.5167	15.308	19.2718	17.168	16.8188	16.5581	18.1683	16.8308	18.9843	18.9489	15.1893	16.0366	17.5392	15.87	12.8102	18.0247	16.5119	17.0634	12.3521	9.18895	16.4665	14.7355
HADHA	35.053	35.2641	36.8723	33.4778	35.1999	34.1866	37.233	33.6736	35.5369	36.7942	33.7426	36.5993	33.5089	37.0155	35.692	36.0416	31.0123	34.9988	34.953	34.2962	35.0638	35.2559	36.6354	36.6906	36.4391	34.812	34.8305	36.7907	32.0669	37.6189	34.8026	34.9529	36.3935	33.7599	35.9767	37.1799	36.4474	35.0874	35.9961	36.6423	34.4036	38.2144	33.3162	37.5815	36.5137	34.3628	31.6767	34.846	34.4602
MINPP1	3.47319	7.50327	6.63183	6.54396	7.27652	5.29185	7.56572	4.77116	6.3559	8.47383	4.8008	6.16007	6.50856	7.79019	-5.92922	8.66535	7.30768	4.14804	7.81882	4.2673	3.93064	6.11893	7.2606	6.23027	6.83643	6.50711	6.03166	8.19705	8.26015	7.36038	7.22782	6.55304	3.03006	5.28354	4.66375	8.60943	9.87453	8.21152	9.44781	5.17522	8.77287	4.16823	6.55466	7.48342	4.64551	3.90928	4.50892	6.57781	6.277
RDH16	0.946994	0.833593	1.47987	1.34532	1.41905	0.574765	1.07284	0.678891	1.66691	1.3136	0.997429	0.853599	1.26002	0.986635	0.866299	0.81701	1.01542	0.965395	0.899599	1.03926	1.32262	1.53662	1.06258	1.24702	1.21566	1.23864	1.12856	0.796426	1.13794	0.564967	1.07635	1.25803	0.967723	0.701649	1.14125	0.931625	0.940962	1.41857	0.848876	1.11487	0.604241	0.65363	1.11837	1.02897	1.05278	1.1333	1.22376	1.11616	1.06403
LIPC	0.827367	0.595588	1.04955	0.690331	1.1513	1.16303	0.464884	0.546354	0.365635	0.819557	0.66761	1.59261	0.953564	1.23255	0.575421	0.914894	1.08606	0.492515	1.02942	0.360916	0.793815	1.15864	1.12977	0.336125	0.957041	0.553123	1.66922	1.14599	0.853627	1.48696	1.80312	0.880873	0.571639	0.637143	0.904521	1.48856	1.17776	0.95943	0.970613	0.97976	0.757434	0.654774	1.4627	0.885688	0.682965	0.283895	1.12023	0.87616	1.20926
DEGS2	4.06168	0.860312	0.98213	0.38039	3.5424	2.99855	7.1751	2.66577	4.20048	6.07218	0.629514	5.288	1.84706	-2.19654	-0.163693	5.04905	0.576899	-1.89818	1.21617	2.10182	0.887629	5.26012	2.36111	-0.956358	15.3776	5.1331	2.2884	2.04763	5.29307	5.31558	-1.72506	4.86435	2.20335	-0.609465	0.583555	0.9802	2.67396	4.27597	2.10582	2.72682	2.19727	1.75637	-1.095	4.15264	7.25521	3.50282	1.59185	2.11716	3.11329
GPX1	131.912	133.467	132.578	131.037	128.896	133.272	128.623	131.596	126.368	125.176	126.868	130.964	130.583	131.96	131.206	132.647	132.467	133.699	133.635	130.675	135.14	131.309	133.692	131.104	133.725	130.276	134.836	132.563	130.281	132.734	132.132	134.271	132.797	132.074	131.114	135.545	128.708	132.953	131.367	133.245	134.699	129.834	131.374	130.091	130.46	132.146	130.313	134.701	131.628
BLVRB	39.138	34.0819	42.1623	39.8354	46.3875	36.4554	46.6144	39.8105	35.8662	36.3193	41.1431	37.1186	39.6015	41.2621	39.0464	43.5741	36.6813	39.8091	42.146	38.2454	40.1329	37.0942	39.2717	38.6395	41.0259	39.9204	38.0067	36.363	33.7008	37.9592	34.9628	34.6503	41.9498	41.3909	37.1032	37.4055	38.437	49.9808	35.3416	39.5412	38.5759	37.5895	32.6265	37.2564	40.1376	39.3923	35.341	40.4153	38.2118
LPCAT3	5.02019	4.28497	2.30176	4.74697	3.42023	5.55193	5.33771	5.30287	6.92174	4.44829	5.59142	4.81797	6.97275	4.58818	5.18676	3.34525	1.89511	4.46779	3.32317	7.24328	3.86216	5.37829	3.40084	6.65228	2.38371	4.53605	4.57185	6.38679	2.77351	3.10686	5.4343	5.66696	4.37711	4.30266	5.1511	5.03232	4.09283	4.55053	2.35987	4.4729	4.59993	3.95145	4.31911	6.94129	6.90865	4.78908	-0.947851	2.58013	2.36334
SUCLG2	21.6887	19.1497	24.5425	17.3349	26.8179	20.6112	18.0454	20.4501	19.0054	16.3611	16.5885	25.0125	17.7378	15.6447	16.2538	19.4242	20.0157	21.7922	22.5716	14.4872	22.0916	16.1382	19.0541	17.8069	18.8174	21.5717	21.1677	25.9684	19.4829	22.3169	17.9593	25.1521	21.2699	17.4215	16.2317	21.7336	25.4569	19.4597	20.3341	17.5377	21.403	17.7094	16.286	15.3922	15.6675	18.3697	17.7353	20.3939	17.2979
GCLM	5.51715	3.4188	12.7274	17.7165	7.45322	4.64258	21.8485	3.67401	5.5949	0.514985	16.9971	6.54567	14.3759	5.25862	20.1304	18.1834	5.39135	1.09215	11.2973	9.85875	11.9925	16.3747	6.3673	10.7868	10.0632	4.66782	9.56029	6.25033	14.7397	3.36285	3.43607	15.7208	4.8705	3.31681	10.8307	5.74244	11.7228	14.8936	4.88142	8.12209	7.84911	8.16474	5.1803	5.12756	13.1675	4.69378	12.3419	2.93427	10.3892
GLUD1	24.3355	28.1405	22.4699	24.6933	28.0757	24.8064	31.6673	26.3158	28.7323	27.5906	24.1454	30.6434	26.756	32.2799	14.5096	27.0515	28.0313	26.6769	28.1318	26.1984	25.0788	29.2556	28.2226	25.7343	27.1867	26.1515	26.3852	27.8243	27.4493	29.3348	26.281	25.9797	21.8046	25.9141	28.5171	27.8326	27.5408	22.9838	25.8381	29.2046	26.194	30.1634	28.5807	31.7386	28.7433	25.4782	21.7514	27.1025	25.7316
ATIC	17.7195	20.2365	20.4465	17.5703	18.1598	16.6779	20.1387	12.8011	14.8393	15.4658	17.5224	20.0785	19.6044	21.5054	22.5231	20.388	20.2756	13.8915	16.5184	16.886	18.0111	15.5849	18.1502	16.1206	19.2824	16.8041	16.3797	18.6135	21.3185	19.9983	15.9272	19.6914	17.9739	12.6813	16.76	15.5756	18.6832	23.0166	23.0485	13.6981	16.8936	14.7796	15.4348	19.4827	14.4825	13.9774	19.8773	16.2362	19.4059
PIP5K1B	3.82188	1.17887	0.328585	3.74751	4.25944	2.16125	-0.868891	5.08808	-2.0131	0.351899	2.67629	4.00434	2.76559	-0.336443	4.65215	1.32119	3.07277	5.38431	4.09158	2.10309	2.16727	2.83416	0.689964	0.724125	3.23125	3.2106	3.7214	2.15366	0.267556	3.2096	2.59794	1.67	1.74083	2.97946	2.23772	3.5613	2.7817	3.4616	1.66783	3.43933	0.460285	2.15979	0.480412	3.10803	2.19675	4.75748	1.28393	2.22907	3.23804
GAMT	2.18793	4.66141	3.53564	6.03186	9.16357	3.46889	6.44738	1.41623	6.84493	4.05396	8.53801	2.45208	10.6385	6.78145	4.17444	7.53698	8.42553	1.38812	2.47167	6.08024	5.90686	3.61944	6.66277	6.14501	2.83238	5.30204	3.11637	3.59599	5.49536	5.16323	4.54722	6.58963	3.77488	4.89372	4.60093	6.3165	6.08529	5.26638	0.119989	5.96476	4.92124	4.62956	4.95343	7.82016	7.43518	2.86967	5.04906	3.56537	4.71249
ADA	1.12323	2.56921	3.40791	3.54516	0.713781	0.59565	6.3725	1.15312	4.47102	4.4539	4.32342	2.61874	5.88238	3.89798	6.11586	2.14835	3.73923	1.91666	1.45248	5.38434	2.20543	5.47154	3.01474	4.76047	2.79315	1.88357	3.59594	3.51232	3.41841	3.83189	6.11088	2.76435	0.597693	0.502417	6.15878	4.17969	3.09191	3.82275	4.44203	4.99291	0.634716	3.59471	3.54407	3.27323	4.73218	1.19124	1.74559	2.84073	4.9868
DNMT3L	0.773205	0.812401	0.802742	0.826219	0.850165	0.764029	0.81419	0.761821	0.860151	0.815566	0.830184	0.84039	0.825889	0.822619	0.829628	0.835929	0.733474	0.852716	0.772878	0.829333	0.848216	0.825961	0.801563	0.788393	0.767497	0.838052	0.796602	0.779883	0.889736	0.760996	0.752994	0.867198	0.807054	0.793639	0.788404	0.806107	0.838969	0.825368	0.766811	0.801179	0.810376	0.747792	0.837947	0.838528	0.802535	0.800337	0.77596	0.830774	0.798317
GYS1	6.66133	7.14871	7.55265	11.9604	4.81186	7.68559	12.1309	7.67764	13.5116	14.8941	14.0377	6.8412	17.0411	6.98332	13.5502	8.33402	9.49216	7.18759	8.49045	11.2418	10.1296	11.7069	10.5175	13.0495	7.54647	8.59141	9.70438	5.99508	7.05325	7.91403	11.5821	8.92928	8.61767	9.05408	12.3942	7.85968	6.65205	7.23444	8.93936	10.8957	9.12986	12.0904	14.1027	9.81852	9.27553	10.2832	12.3163	7.87972	12.1623
ENPP6	0.581619	0.689804	0.676405	0.827027	0.689206	0.833784	0.676059	0.784179	0.781278	0.821709	0.630899	0.931631	0.807613	0.65687	0.964068	0.800043	0.811698	0.859911	0.766142	0.816334	0.647592	0.81727	0.698594	0.699612	0.846915	0.783394	0.806731	0.779825	0.80723	0.649195	0.942732	0.873713	0.770689	0.711616	0.630723	0.795234	0.751682	0.709697	0.691447	0.658968	0.825945	0.693829	0.698408	0.734358	0.783572	0.788952	0.689766	0.741838	0.897019
IL4I1	0.800936	1.9104	8.48251	4.52689	2.37927	1.66871	2.96319	0.633485	1.04223	-1.07049	7.91607	3.50811	9.86435	11.0917	9.41413	15.8536	7.26756	-0.0581996	4.62342	7.00982	11.1834	4.99728	15.9522	0.566126	4.86271	9.88248	15.152	9.82809	-0.673078	7.80323	8.93671	2.31581	2.46284	3.36323	10.3846	14.9826	2.92306	13.876	13.1337	9.81055	3.31966	8.87686	9.26713	-1.399	0.232098	0.713307	12.9706	10.4728	9.85583
MAOB	9.64134	5.23242	7.06409	8.26289	10.2782	10.6731	2.19605	10.7461	2.22423	7.7839	3.64184	7.49083	5.12272	3.40841	3.53464	4.66327	4.84375	10.418	8.88396	2.47838	6.82161	6.48514	5.59161	1.76422	5.4769	11.0396	7.02156	9.50643	5.90802	7.04809	7.2024	8.95355	6.24878	7.64813	3.2412	8.23333	7.02633	4.83294	5.12263	3.70418	8.30089	2.92068	3.42066	2.46374	-0.296146	9.21584	2.07659	10.3222	6.70717
ETNK2	-0.500479	3.02091	4.07762	1.13727	1.40349	1.33295	6.48911	-0.945966	2.25629	4.66058	3.33973	0.342035	5.15	5.18334	4.64777	1.17535	-1.034	0.324615	0.279148	3.21919	1.21047	3.25618	2.2352	5.78243	5.06803	1.24121	0.102765	1.51666	2.10858	-0.23442	1.7612	1.92744	2.93853	2.30994	2.02854	1.64798	3.50033	4.21763	4.21445	3.71831	0.94968	2.9584	1.83359	6.95388	5.80291	0.821158	1.40674	1.71595	2.41021
MLYCD	1.60029	1.25107	1.60466	1.28977	2.10931	1.64195	1.88186	1.4297	1.3238	1.82097	1.18038	1.99994	1.63278	1.4287	1.11033	1.10779	1.41966	1.7324	1.65868	1.46047	1.5372	1.16471	1.20296	1.38695	1.51328	1.80581	1.63864	1.66378	2.00515	1.85129	1.43065	2.20579	1.51566	1.75395	1.66692	1.45319	2.12968	1.70091	1.3845	1.34521	1.7358	1.3774	1.45259	2.16869	1.54707	1.42077	1.10814	1.69762	1.53132
DDO	1.41119	3.02549	1.0439	1.14676	2.15486	2.68435	0.761565	3.25194	0.978486	1.79147	0.337328	2.98275	1.23502	1.3627	1.00764	1.18855	2.15743	3.93372	2.38259	0.986091	1.83363	1.80973	3.53815	0.928138	3.87262	2.26742	2.3759	3.8223	2.22673	2.18222	1.40443	1.57459	1.3749	1.78585	1.79292	3.56735	2.78704	2.71951	0.995874	1.09433	2.50336	0.774476	2.01794	1.11809	0.867463	2.80609	0.554536	2.40037	2.23806
SGMS2	16.1877	15.084	15.2118	5.67467	13.0988	11.5588	11.2909	15.0602	7.29117	9.10286	4.24135	18.9675	5.38695	12.5313	1.81934	9.59932	11.7313	9.73361	14.9651	5.4906	16.6249	8.86104	15.2171	10.0451	13.7429	13.5855	9.50231	17.3425	11.8416	13.2519	8.33556	16.4826	18.1762	13.892	3.35389	13.1106	15.6688	8.43659	11.0894	10.9674	16.1469	15.9274	7.07787	7.60401	4.7	11.9062	8.568	12.2384	8.90997
IDH1	28.1152	24.3003	27.6516	27.731	30.5114	28.5959	30.3565	22.1851	18.2421	20.342	30.1636	27.1542	28.7918	20.4688	29.4736	29.133	25.5326	26.7129	26.8849	27.867	27.683	25.5681	26.6437	25.8725	25.9386	25.513	26.2081	24.6683	28.5691	27.5322	24.1941	27.4702	23.2834	22.9818	26.801	27.1669	29.2191	33.6273	25.3126	34.2568	28.0156	24.8102	21.8252	28.3104	28.0409	27.0311	26.3242	25.0895	29.3214
PIPOX	0.235616	-0.39197	0.908875	0.178699	0.244035	0.977316	-1.09741	1.36636	-0.0952389	0.429608	-1.13754	0.136035	-0.534265	-0.299406	0.168071	3.39141	-0.133281	1.78826	-0.33575	0.72354	1.34358	0.526368	0.77078	-0.331883	1.68115	0.121638	0.217344	5.7791	4.67663	4.02826	0.777881	-0.257429	0.0804223	-0.741589	0.20253	1.71932	0.160292	2.82079	3.14883	1.79894	1.0082	0.359301	4.97364	3.46979	2.27126	1.20412	-0.347184	0.325382	0.595809
MDH2	36.1514	36.0141	36.6843	35.434	43.1218	36.4824	38.0816	34.7604	39.5248	38.6622	36.1526	39.3432	38.6685	38.5058	40.2701	36.2406	36.0378	34.7305	36.1513	33.164	38.1464	36.6901	37.7893	38.2629	34.9088	35.9234	37.9113	35.583	33.3076	38.8247	37.1904	39.2242	34.9196	36.9632	41.1851	38.0501	36.3804	42.4034	30.6716	37.4013	34.9169	35.1137	36.2296	39.4115	37.1739	35.0111	37.4692	35.4269	35.9027
PCYT1A	4.82679	4.96003	5.92136	6.95067	5.01495	5.36726	10.8214	5.69845	10.352	9.65423	8.56198	4.94393	6.58676	6.51211	11.6204	7.22818	4.8431	5.71283	5.58458	6.14396	4.68933	9.15319	6.80769	8.16035	7.19707	5.05954	5.63913	5.85027	6.01716	4.86972	8.16106	4.02285	4.45214	5.19275	9.29729	6.74533	4.60215	7.0022	4.39492	8.62207	5.46636	12.6547	8.05681	11.2588	10.87	5.37165	4.99452	5.70347	4.89415
AOC2	0.396303	1.26309	0.795547	0.35625	0.124829	0.905587	3.24358	1.5558	2.15561	1.39185	1.58905	-0.0530524	0.790303	1.39424	0.149235	1.09508	0.645756	1.51363	1.04796	0.702438	1.41987	0.778761	2.99468	1.13912	0.772622	0.789796	1.10279	0.870381	1.15687	0.229624	0.939669	0.59451	0.895733	0.266931	1.29724	0.422505	0.705007	1.00362	0.433946	0.699229	0.234147	1.71859	0.435876	0.904475	0.826704	1.32341	0.517883	1.16662	0.69856
CDS2	5.4983	6.35871	2.3553	5.28289	5.23088	5.3928	3.8647	5.43373	3.17395	4.04663	6.12545	5.48736	4.16748	3.09891	7.12977	6.35243	4.42278	5.75757	7.26668	5.50663	2.65033	3.2416	5.94327	2.56398	6.47575	4.14223	5.69163	4.9604	2.87671	5.89429	4.47321	4.89976	4.64265	4.14703	2.52744	6.34148	4.86974	5.59529	5.1873	5.37193	2.75551	6.01366	4.39464	7.01232	4.80818	5.30869	8.46429	5.41403	6.44047
LCMT1	9.14721	7.14576	8.56328	6.35338	6.95192	7.36373	7.73102	7.64428	6.55496	10.6027	7.90053	8.56536	8.81245	10.6163	6.11416	9.55746	13.2677	8.01481	7.6621	8.12568	7.86222	6.78834	7.85019	11.4232	7.87225	6.63157	7.15823	8.61965	5.84942	10.0031	8.25153	8.32166	7.52492	5.99456	5.64202	8.36487	7.23476	9.16597	7.87151	7.06144	8.45936	6.27135	5.56295	6.84543	8.26709	5.37791	5.52961	7.4843	8.36003
NOS1	0.608584	0.229469	0.854549	1.33903	1.18358	0.716021	3.04178	1.18717	3.1512	3.34959	1.19643	0.568324	3.21531	0.617067	0.613003	0.265085	0.612223	1.43942	0.814286	0.224966	0.721186	1.69906	0.366678	0.811037	0.129479	0.752478	0.348921	0.352283	1.03744	-0.0576236	0.122833	0.397216	1.32953	0.56787	1.12129	0.720845	0.753293	0.810829	0.539208	0.867623	0.385913	1.80935	0.0992992	2.56703	1.10565	1.12571	0.540731	0.107487	0.416523
PNLIP	1.23636	0.739581	0.418559	1.21396	1.59099	0.711196	2.03219	0.0701518	2.0022	0.254818	0.308293	0.504133	0.444546	0.264069	-0.297091	1.29123	0.338491	0.473462	0.784922	-0.223391	1.253	0.339587	0.668945	1.2235	0.885724	1.33821	0.694096	-0.0194138	0.24187	1.21346	0.433722	0.471662	1.29752	0.384675	0.851594	1.1663	1.69013	1.01881	0.472789	-0.149926	0.970099	0.492341	-0.461198	0.372978	0.838446	0.839648	1.00034	0.708327	0.602295
PAFAH1B2	10.5229	11.7261	11.7509	11.3483	10.4549	9.76871	14.9674	11.1078	16.5993	12.7947	13.9187	10.9501	13.0488	11.6191	14.0247	12.2708	10.9952	9.95873	12.0743	12.115	13.6487	12.3932	11.1778	13.6316	11.9372	10.2422	11.2097	14.293	13.8478	12.1493	14.548	12.3352	9.03652	8.60755	12.0467	11.5405	13.3164	12.9804	12.0975	11.5703	12.6784	12.1158	14.3489	13.4857	12.8703	10.88	13.6867	9.73437	9.58827
LYPLA2	31.3533	30.5703	34.042	27.4977	30.1376	30.2162	27.8943	25.6366	27.7785	26.6339	23.6316	27.3166	28.2945	26.3255	25.4561	26.4451	28.849	24.7715	29.3103	27.255	25.8343	28.2712	27.5547	28.0221	29.5408	27.5869	28.4232	29.3595	30.3979	29.355	26.1829	28.8432	27.4597	28.4001	25.9378	26.062	26.3138	29.0823	26.7144	24.2761	27.0755	25.3349	27.4559	26.4381	25.2764	29.479	26.7102	27.4023	26.562
GGT1	2.72037	3.02836	4.50076	8.02092	9.42941	5.83107	6.79022	4.64105	6.87204	7.60151	6.36853	4.25353	3.98258	8.68075	6.20952	2.6209	6.11862	8.23494	3.53487	5.3051	8.77241	10.3913	4.09788	8.04673	5.51132	4.61775	3.46937	4.4869	7.66686	0.222587	3.94786	3.74479	5.93446	5.37881	7.00347	3.71727	5.29746	8.25687	3.34949	5.85806	2.9252	5.07292	4.71501	8.3106	3.85589	4.65952	5.08734	1.96377	3.42783
GPAM	3.38435	5.29813	0.814658	1.27036	7.6737	3.99019	1.83539	2.91919	3.90854	3.34447	1.83815	0.876579	1.92689	2.44979	3.06701	1.72299	2.69057	3.07537	4.39661	1.62779	2.42888	0.819763	5.34142	3.2156	1.39972	2.00572	1.76802	1.64306	3.29608	3.26948	2.62935	6.13484	5.44699	2.62835	0.283637	0.351009	7.37112	3.24786	3.93564	3.08499	7.42706	0.696405	2.3513	1.99099	1.45608	3.79886	3.18424	1.48252	2.94424
GART	5.53699	5.76892	8.6482	4.44827	6.06524	7.27101	11.195	3.36614	8.50655	6.15833	9.35227	7.30003	5.0941	11.764	8.97153	7.58219	7.10821	4.36842	5.57197	10.1307	8.39102	7.17571	6.42693	9.26179	5.62494	4.90494	5.92868	7.24622	5.63095	6.80601	7.204	6.55969	5.83604	7.01051	10.5265	8.58212	3.7419	10.7688	8.99041	5.93441	6.82746	5.47988	5.44955	5.79075	12.615	3.85887	6.55014	5.46153	4.83465
MTMR1	8.44781	5.55519	4.12165	5.20836	3.79729	6.32163	5.74114	4.15577	5.88794	6.28031	7.20837	5.00401	5.33515	9.51809	7.40222	5.71789	4.64943	3.6581	4.7301	7.22443	3.40993	7.45039	4.53597	9.30765	4.08245	6.3112	5.23044	4.67039	2.50979	4.11881	3.64663	4.07554	6.73235	7.78232	6.7051	6.08882	5.05801	5.13701	3.94541	7.1539	6.17152	8.41936	6.09374	8.64219	7.95808	3.80476	6.24148	4.21735	3.74822
MTHFD1L	5.73154	5.2538	4.97075	5.46102	4.78392	4.82462	3.69773	5.41985	6.67685	6.95253	6.19165	3.98969	5.48695	7.39571	4.89173	2.33075	3.6063	3.86156	4.98969	6.13409	4.83932	7.16494	3.36073	7.13099	3.01678	3.24219	2.62246	5.799	6.82592	1.78022	5.15072	6.72366	7.23752	3.22021	4.42964	3.53503	7.75519	4.80252	3.50678	6.65441	3.72165	4.02925	4.15022	9.44153	4.67078	4.29322	6.96104	4.36816	2.4046
ADSS	15.9222	16.2863	16.8152	13.3023	17.6211	16.2994	17.3488	12.8185	20.0292	14.0026	17.4799	18.8688	15.6048	17.7218	20.2519	17.6709	13.7874	11.885	13.7645	16.9768	16.9634	16.1391	14.1782	17.6381	15.5491	13.6077	15.2034	13.1808	16.8525	11.7243	13.472	16.6819	15.5191	13.8609	17.4512	12.7893	16.3271	17.2256	13.5873	15.2831	15.5008	15.2944	13.7161	17.4227	18.3137	12.2566	15.9129	15.9577	13.7534
GSTM1	5.35833	-1.27335	6.16923	1.72989	2.82325	1.8235	15.4171	7.20164	10.4678	1.78752	1.85681	3.879	1.09307	3.73075	5.64214	2.95605	-1.78567	5.69649	3.56281	5.54923	2.85409	-0.693686	-1.26471	8.31284	5.86339	0.728961	1.70996	3.68039	4.3363	3.23881	0.0772227	4.24578	-0.598113	1.58683	14.954	2.19382	0.246519	3.58634	2.5197	2.78804	1.90751	0.372001	-2.83294	8.10781	16.0074	0.916898	4.6263	3.31791	5.42578
CYP2C19	0.872563	0.862665	0.882699	0.889312	0.903009	0.902176	0.893288	0.817936	0.88106	0.930814	0.890124	0.815285	0.833345	0.85435	0.872281	0.819607	0.813814	0.850106	0.858213	0.931177	0.854627	0.952787	0.859503	0.881954	0.847297	0.813756	0.823191	0.884831	0.831801	0.8661	0.862294	0.864086	0.887352	0.873214	0.886128	0.774797	0.879087	0.837498	0.836706	0.926731	0.872377	0.883604	0.857431	0.892456	0.918049	0.862509	0.90899	0.860976	0.892625
NOS2	1.08134	0.00501777	0.746902	1.22707	3.19695	-1.33992	3.10161	0.339809	1.38877	2.17415	-1.55202	0.207432	6.74007	0.761826	1.76926	1.68057	0.927192	1.25638	0.949986	6.59551	0.657551	5.55614	0.160823	1.88099	6.22707	0.559588	1.13381	0.800925	0.29785	0.353744	2.69906	1.35898	-0.303114	0.796161	3.88503	1.21848	0.463842	1.11043	1.93797	0.611619	-0.00433673	6.68923	0.109017	1.2398	1.85018	1.5726	3.71631	1.94788	2.33511
CA5A	0.932175	0.85649	0.886813	0.884897	1.05784	0.915093	0.890652	0.865274	0.954271	0.862793	0.897709	0.840136	0.943056	0.898798	0.947995	0.961805	0.990306	0.871486	0.891544	0.879844	0.968461	0.925859	0.890427	0.915027	0.861246	0.871506	0.91324	0.823297	0.827887	0.857256	0.862386	0.929726	0.97123	0.902951	0.917943	0.865804	0.945111	0.921324	0.878928	0.898001	0.857644	0.862339	0.924702	0.852028	0.842	0.905162	0.916486	0.916055	0.932801
NPL	6.84728	2.75067	3.03149	5.25677	5.14385	6.94919	10.584	3.7992	8.47302	5.81333	9.85162	5.44342	6.43076	3.00851	11.0912	5.37832	6.91925	7.22955	4.88281	8.42132	7.24767	7.93144	8.0708	9.22395	7.46234	3.33333	8.46966	6.04857	2.10906	9.27632	6.50463	8.31841	1.93546	5.08296	11.0109	8.11689	3.04566	7.34876	6.53265	9.58556	6.44955	7.98545	3.8557	8.77755	7.22921	8.14536	4.8555	7.24322	6.19948
INPP4B	4.76031	7.38963	2.33708	3.85475	3.01024	2.03719	1.25259	2.73754	0.198726	1.65993	0.981812	2.00119	1.04842	3.70211	1.51025	5.47324	5.40864	1.75045	3.31512	1.10068	6.55343	2.51421	2.12894	2.82794	6.56625	2.06996	3.04411	4.4191	5.19996	4.40012	2.95864	3.14727	0.640639	0.380856	2.29857	3.42984	4.17729	6.19432	4.01088	2.21197	1.00195	2.08868	5.78437	2.01366	-0.0107194	3.37381	3.76732	4.35612	1.86148
SAT2	13.5929	12.6422	10.8174	14.8219	14.1933	12.2416	10.7477	17.2497	6.92474	11.479	13.0962	17.7814	14.3947	11.1632	12.8436	13.7054	14.8799	18.8685	15.7803	13.3665	14.6786	11.9576	15.3436	17.2889	13.4473	14.8002	16.381	14.6588	13.4769	14.1847	16.4098	17.1103	16.1456	18.3427	12.9935	14.9704	17.1386	13.6712	12.9184	15.5444	13.7486	13.5609	16.8694	13.5453	19.4404	18.4408	16.4702	14.8712	14.4238
AMT	3.45593	3.86691	2.14034	2.42072	6.75028	4.64604	1.59185	4.4332	0.711247	0.302236	2.52279	2.43676	1.71319	1.66612	1.21301	1.66206	3.04614	4.90836	3.19477	1.8088	3.52152	1.55049	3.62007	1.27019	4.37657	5.72782	3.75519	4.34282	4.19446	3.59003	2.99544	2.6486	4.85842	3.87387	2.78765	1.35059	4.83722	1.3588	0.499274	2.10152	5.11334	3.61302	1.98628	1.38163	0.339307	3.39534	3.71132	4.11198	2.17557
AHCY	27.3258	27.2673	28.0442	28.365	25.2084	25.9924	29.8074	23.525	27.3459	30.5626	30.2535	32.4524	31.2727	30.77	31.7232	25.263	29.1148	22.1773	24.3366	25.859	26.9648	27.624	25.8022	29.5261	30.236	24.0329	28.4147	26.6148	27.802	28.7508	30.0845	27.7103	28.1969	24.9443	29.713	23.8096	27.104	29.1724	35.0959	29.5353	27.1758	27.5264	27.0502	28.63	33.4877	25.3274	23.9589	24.554	29.7517
SGMS1	6.92562	12.048	6.09655	5.70594	9.12859	15.2886	10.5184	10.6228	12.3773	9.13891	7.08127	10.1816	7.13385	10.9422	9.95297	7.53453	5.46945	10.7639	11.8582	5.19367	11.2456	9.70805	11.7039	6.95781	6.52378	8.36181	6.89625	8.09048	3.88114	8.40214	6.25032	6.94174	10.1615	12.2768	6.28721	8.95462	6.87312	5.45827	4.07007	5.7698	8.72726	10.1452	3.27808	5.94202	9.82691	7.10443	1.48846	10.9616	6.30176
CBR1	45.4885	44.8073	41.6628	43.607	61.6781	43.951	64.478	43.7459	50.0032	57.2689	57.0284	43.4178	48.5011	40.1843	61.3064	56.616	40.6972	43.993	61.5524	49.5575	45.7882	50.4373	42.727	53.1692	47.6184	42.9856	45.2422	47.2422	50.1522	50.0452	42.9725	66.5383	40.5349	43.5529	50.4286	44.0104	63.2819	45.25	39.8478	53.6156	46.9741	48.9923	42.9165	54.0497	57.3884	39.7264	39.9682	42.965	47.1966
PLA2G2E	0.840222	0.900811	0.91559	0.884581	0.980851	0.889633	0.832936	0.836476	0.887271	0.892267	0.859587	0.856432	0.916145	0.910012	0.912302	0.831501	0.89659	0.871682	0.804836	0.901898	0.866532	0.887448	0.908379	0.893979	0.884219	0.900379	0.89403	0.904025	0.893123	0.877356	0.869466	0.877088	0.909774	0.817114	0.876126	0.914666	0.915028	0.837192	0.893514	0.907087	0.839289	0.877651	0.859359	0.881899	0.893236	0.838259	0.947569	0.90343	0.828549
GSTM4	1.869	1.31352	2.78013	2.32319	2.04873	1.42633	5.42285	3.11254	3.85389	2.88175	2.38165	2.90827	3.28455	1.67707	4.69183	3.76727	1.58965	2.53047	2.99254	3.56522	2.34854	1.95738	2.19997	3.04976	3.30305	2.72756	2.65388	2.41836	2.60934	3.14143	2.28477	3.24241	2.49343	2.33354	3.37285	2.6997	2.7516	1.48822	3.60226	3.34429	2.11299	2.9942	1.89685	4.54362	3.34803	2.37078	2.33702	2.65303	3.57185
NEU1	23.5087	22.7833	27.0586	18.9428	19.9082	15.932	16.4228	15.3818	10.1729	19.3131	14.5791	19.0505	20.4167	17.6782	16.9974	22.891	20.2243	16.2121	19.512	18.1504	15.8663	13.8214	20.1832	17.0913	27.6544	15.4769	19.2858	20.4864	16.6788	18.3124	18.6831	16.0105	17.0647	14.1008	13.1521	18.1657	19.7602	16.0632	19.6765	16.795	17.5661	19.3348	17.1615	17.1282	18.9909	18.2104	23.1259	20.4307	18.7393
APIP	3.21498	2.76604	2.49405	2.49621	2.36977	2.52567	3.95168	3.84246	2.40926	0.455118	3.20376	3.73233	2.93315	2.78038	2.68104	2.64503	3.36312	3.64213	2.69088	3.89832	2.12952	2.08161	2.8272	3.13121	3.61144	3.24835	2.58331	2.80117	3.69308	3.57593	2.68319	4.91307	5.09039	2.77901	0.910951	2.37956	4.23609	4.38179	4.82731	2.25113	4.87864	2.17423	3.03647	2.41751	2.02158	3.75912	1.67727	3.91874	2.52457
FMO2	23.2077	14.5186	11.2783	17.0314	10.3503	19.9453	4.06091	23.2957	1.76871	5.7511	4.59518	13.2118	6.68332	0.17837	7.11662	4.26868	8.30788	23.7987	16.8561	13.2964	8.66714	16.4744	11.8624	9.09604	14.2254	18.1307	14.2595	14.2245	5.81118	17.7272	9.48962	13.5445	11.6429	15.0408	4.53532	13.6337	10.9659	9.15655	6.60969	13.4178	11.9465	8.86535	9.22067	-6.64611	2.36718	23.1319	10.543	18.8969	10.3254
PGD	59.9005	55.5889	62.9598	63.9356	68.0076	58.4653	64.7107	56.0409	57.4648	57.5982	61.4597	58.6123	61.5553	57.5363	65.812	63.0683	56.5345	59.8722	59.433	59.1018	58.4256	62.594	58.6669	60.8294	60.6345	55.609	57.752	59.8467	66.7411	57.5909	56.6346	62.7585	56.0057	56.6193	62.8047	61.2963	62.8033	64.4357	59.5797	62.5637	56.4416	59.0096	56.0743	61.0131	62.3317	60.748	58.6889	57.2066	57.525
DGKB	0.708955	0.734471	0.691907	0.764016	0.608871	0.561279	0.756312	0.646351	0.614837	0.760234	0.659592	0.654335	0.656281	0.940276	0.745764	0.768438	0.754304	0.817425	0.668684	0.613481	0.62083	0.63601	0.586015	0.846111	0.676667	0.641325	0.588478	0.602485	0.605844	0.62745	0.589279	0.682973	0.639326	0.63548	0.778239	0.578533	0.658812	0.599867	0.617753	0.706455	0.564008	0.651093	0.680506	1.03113	0.830839	0.708171	0.636669	0.679719	0.622342
TXNRD2	6.30083	2.3973	4.81032	3.44355	6.1077	4.40155	5.81616	3.33625	2.55909	3.74319	4.30888	4.52449	4.67248	4.45718	0.903949	5.8489	2.99283	4.31041	4.7925	2.04712	3.7383	2.26787	2.59374	4.1042	4.96252	5.98317	2.97175	3.16375	5.62117	3.9195	3.77185	6.03288	4.69606	5.46277	3.48954	3.48774	6.71654	3.79853	3.63614	4.45349	3.67688	1.0172	3.83609	5.38282	6.88458	3.71494	4.11414	2.44328	3.86853
POLR1C	9.53001	9.65306	11.1037	5.48386	5.68636	5.67771	9.50157	3.30671	6.96619	9.28303	7.44252	9.82951	9.44441	5.67932	8.91373	8.48621	8.48416	2.42064	6.39272	8.18229	5.91865	4.97418	7.4939	10.7696	7.69872	6.81928	7.04874	7.9163	8.07915	6.03309	7.69707	8.87742	4.62754	6.92979	6.31426	5.37061	6.18075	8.54362	9.74751	6.8588	4.94883	4.9993	8.61551	9.40253	11.4293	4.38432	7.08831	5.6087	7.52529
UPB1	0.969387	1.28725	0.905501	1.0235	1.36073	0.841962	0.754649	1.02263	0.783509	0.843589	0.639096	0.920848	1.16666	0.990612	0.874612	1.10161	1.14509	1.00135	0.902322	0.907082	1.12454	1.05629	0.984541	0.956301	0.855972	0.903013	0.660971	0.679844	1.0369	0.913653	0.937872	0.928037	1.02427	0.69905	0.773344	1.08935	0.876664	0.784428	1.04445	0.736054	0.567613	0.881273	0.846738	0.989963	0.890966	1.09585	1.0542	0.811156	1.01766
DGKI	0.776732	0.829084	1.01984	0.752273	1.31098	0.676903	0.735026	0.61345	0.83229	0.793973	1.02419	0.873694	0.970217	0.795594	0.973544	0.870668	0.880898	0.668243	0.855548	0.744443	0.851813	0.8202	0.759098	0.894128	0.997407	0.836183	0.785285	0.822876	0.995029	0.887768	0.889421	0.745404	1.05852	1.00171	0.809672	0.845698	0.818343	0.799206	0.875941	1.66464	0.942179	0.749365	0.852301	0.918969	0.931591	0.792936	0.849801	0.779025	0.849604
ACSM3	6.48768	2.96794	2.90702	1.64609	4.01964	3.99441	0.0293363	3.65677	0.632219	0.935348	1.32424	6.01379	2.95899	1.25167	0.529519	3.61367	2.07805	3.28934	3.54957	2.32396	5.00669	1.80654	2.96757	2.40373	3.93487	5.28274	3.69455	4.33368	1.2773	3.65627	1.60179	5.4951	5.53157	4.87759	0.355475	2.53408	6.12936	2.07344	3.41766	2.4335	4.04332	0.933604	1.78558	0.147568	0.837718	2.82463	4.42094	2.94245	3.49191
PHPT1	27.889	30.9417	28.0155	28.5269	34.2416	28.248	25.6619	29.5242	25.9683	27.8754	30.3828	30.7537	28.4924	31.0578	24.5749	30.1027	29.9175	29.5672	33.5953	28.9717	32.7206	28.783	33.241	27.159	26.8102	29.8707	32.0125	31.9037	26.3136	34.175	32.2043	30.9552	29.8527	29.2861	26.9002	31.0987	30.8766	24.1257	30.1548	30.9993	32.7564	25.587	27.5417	27.8675	22.908	23.6939	28.2813	30.9866	34.0973
AKR1C4	-0.920228	-2.27192	0.551778	2.22325	5.30655	-1.42795	0.134666	-2.32511	-1.56464	0.0456452	0.281667	-0.0550554	0.840451	-2.65164	-0.0840023	20.541	-2.01533	-0.510766	0.920039	0.510658	-1.36689	0.233189	-2.61689	-0.276339	-0.264154	-0.390782	-1.30672	6.7179	20.5174	5.65833	-1.62199	5.10274	-0.720233	-2.2806	3.31872	-0.0806061	8.41334	16.5675	-2.36109	2.49909	-1.48221	-0.893509	-0.428392	0.349276	6.04476	-0.472912	0.407261	-0.96425	-0.440058
PYCR1	27.5351	27.0457	34.6493	24.4534	30.2886	24.5283	29.3748	15.2709	26.2866	25.1765	27.5693	28.1931	28.8303	32.3795	31.5709	31.3871	25.6489	11.9555	26.1601	29.5097	21.5377	24.5938	33.2935	31.0997	35.49	16.5136	29.5338	29.022	34.0036	28.5792	28.796	33.2463	16.2336	21.8739	28.1715	32.4282	32.1445	33.8548	30.6827	28.0922	15.7328	25.8872	23.3324	27.26	33.1687	17.7014	28.8695	26.9617	33.0238
NUDT5	10.3768	9.73353	11.7981	7.56718	16.0583	10.8056	9.36911	9.09516	8.1493	2.71385	10.8285	11.0001	8.79676	11.7072	7.4876	11.919	7.08498	7.6053	9.38723	7.42085	6.27292	8.3035	10.2232	10.6625	8.28078	9.00365	10.7573	8.3762	9.6067	8.99566	7.72802	11.4984	9.82256	9.06203	7.65708	11.3046	12.6497	11.9823	11.4207	4.18298	9.93223	10.8844	4.09306	8.73535	12.2582	8.63593	12.5495	7.59424	9.17945
G6PC	-0.130649	-1.12717	1.80216	0.300274	1.38699	-0.294533	-0.645785	-0.421286	4.29858	2.192	0.382539	-0.441314	-1.15744	1.89914	0.15286	1.04721	-0.457314	-0.687361	0.827387	0.559686	-0.996903	-1.3723	-1.06586	0.760271	-0.585307	0.733697	0.342936	0.220312	0.622856	-1.11662	-1.2409	-0.476713	0.5873	-1.6103	0.770956	0.468205	0.923701	1.10064	0.190164	1.15049	-0.584563	0.260353	1.59691	1.97793	0.712499	-0.287577	0.636737	-0.743945	-2.46766
PTDSS2	4.86672	4.81908	2.86644	2.05224	3.97141	3.14823	4.35482	3.13448	0.992924	0.679611	2.68263	3.27593	5.66605	4.45257	4.25721	4.83526	4.37887	3.84792	2.81058	5.32213	3.4133	0.758547	2.80549	3.69858	5.24744	4.00492	3.87688	3.04737	5.01583	5.04073	3.79526	4.18644	4.12901	3.80969	2.85849	2.94905	5.94646	3.97494	5.01557	3.36047	4.95718	2.1835	4.15153	3.12887	3.48171	3.341	4.21002	2.05961	3.79625
ACACA	3.96197	8.13294	10.7707	5.64854	7.63167	6.67543	7.90769	6.0953	6.55488	4.54753	7.94701	6.91559	7.32695	6.04178	7.53513	10.566	5.18724	3.68691	6.20911	3.82145	1.38744	5.73635	2.02129	5.09255	5.56598	5.37884	2.58489	2.43172	8.19328	3.52645	2.04068	8.42433	7.52949	6.80935	7.87954	1.56624	8.2618	8.55754	5.41538	7.20283	7.50883	8.01517	3.63101	9.69248	7.30192	4.20147	4.54911	6.18246	3.28721
POLD2	14.5479	13.6759	19.5569	12.5948	16.5251	13.2478	21.6523	12.9568	19.3384	22.8069	19.6328	17.402	22.6041	18.0536	25.9075	17.1316	14.4076	11.2943	9.79461	17.9991	13.5747	18.7687	17.3542	20.8051	15.5258	14.2824	16.4964	13.9422	18.6515	13.439	15.9475	18.2104	10.4396	13.3432	22.5993	11.9392	9.38919	17.3979	20.2361	13.894	9.40409	17.26	13.4692	20.7955	22.7838	11.2601	11.1664	12.7942	16.6099
ADCY8	0.887608	0.683125	0.88961	1.26785	1.35837	0.73503	0.611688	1.16056	0.734122	0.600085	0.921273	0.620917	0.86798	0.890083	0.859512	0.908681	0.728615	0.856377	0.598744	0.811867	0.881325	1.01004	0.874848	1.01656	0.855281	0.588232	0.690592	0.856452	0.81634	0.849308	0.661573	0.702567	0.621009	0.63237	0.838472	0.637619	0.818121	0.782995	0.943178	1.80305	0.735575	0.826502	0.953402	1.00531	2.2635	0.783931	0.980163	0.667895	0.907795
PLA2G6	3.50989	1.51049	1.70992	0.748729	3.90382	2.54574	1.61991	2.72911	2.87224	2.49915	4.98068	1.53422	4.73479	0.947008	1.96895	2.25119	0.447321	3.46674	1.57305	2.82644	1.50515	2.28087	1.07513	2.83719	3.53139	2.45581	0.365519	0.840922	1.10682	0.911865	0.59986	2.41632	4.97468	2.91386	2.77339	0.871417	3.54251	1.22126	2.446	3.86987	1.6043	3.5889	4.40104	5.32756	2.75536	2.30274	-0.227742	1.88111	0.177642
CD38	1.97852	2.06549	4.67426	8.28408	5.65966	1.26824	5.92146	1.28966	-1.56008	5.25115	3.0326	5.65987	7.45586	2.94191	6.31936	7.34436	8.13088	-0.402174	2.77876	5.49487	4.63197	4.77632	3.68369	0.983259	5.45037	3.3809	7.35298	10.8302	3.69409	0.793873	6.59183	4.35077	3.78101	-1.16162	1.81914	8.72053	6.01879	3.37917	7.02162	3.51713	0.596744	7.66653	6.33635	-0.483541	4.90457	0.48367	3.95034	6.70579	10.1411
CPT1C	0.660212	0.957998	1.04818	0.864624	0.107144	0.207241	0.744497	0.371331	1.58375	1.85768	-0.168409	0.17355	3.48611	1.31287	0.638207	2.0855	0.844387	0.555031	0.978658	0.255879	0.99698	0.98175	1.38107	1.23505	1.97653	-0.325429	0.934142	0.778397	2.2442	0.845805	1.23695	1.00311	-0.655295	-0.368198	1.14294	1.20109	-0.643864	0.478379	0.826717	0.476412	0.522787	0.680851	0.849106	0.402392	2.66432	0.223567	1.62009	0.35238	2.06986
SPTLC1	7.92823	13.4842	8.35198	7.30009	8.67054	8.10972	9.68071	8.67629	14.1616	12.9211	13.4241	11.3461	10.54	15.0679	17.113	11.319	10.6788	8.53383	11.0001	9.28604	8.44773	12.9376	15.125	9.04004	9.52794	8.01978	11.6908	8.73252	7.19734	9.67869	10.6942	6.84862	8.809	7.61111	11.1139	13.4071	7.26063	12.2383	7.97159	12.5216	8.69703	12.3395	9.58502	13.527	14.6166	6.92432	11.0136	9.67657	10.2912
ALDH6A1	9.32712	4.60865	6.40257	2.8941	9.66527	7.75021	8.4226	6.99911	-4.40448	5.44143	5.47155	9.67073	6.12756	2.61775	1.40181	6.20586	2.11664	7.22091	7.37249	4.14316	3.22974	3.70694	2.43739	7.96219	4.70069	5.46387	4.63247	5.53699	4.6224	8.1648	1.90879	9.74139	8.67848	8.04388	2.86085	5.57715	12.2056	5.20087	8.30413	4.41118	6.26055	5.82978	2.873	2.79829	5.99836	5.52989	1.78172	3.00621	4.71929
CYP2S1	3.75279	13.7349	3.39076	16.8101	4.44664	7.42197	19.9628	6.93354	7.77864	13.4973	20.1863	0.0449148	18.6902	2.39822	20.5343	7.8422	2.97533	1.23876	5.8683	10.947	3.40881	21.0066	6.35669	19.8675	3.75963	6.09039	7.46683	2.63545	7.27021	8.732	11.156	2.65838	3.26216	7.54812	15.3609	3.82193	2.73421	6.37989	1.59523	15.0141	2.95568	19.6949	17.4938	15.9196	20.399	15.673	8.23366	3.3972	4.46411
DNMT3A	3.82694	8.88132	5.964	3.23871	1.56677	2.178	1.19408	2.68586	0.100772	1.38924	2.62133	2.81348	3.26255	3.38231	4.82148	3.90782	3.14198	2.29381	3.09308	4.88405	2.82558	3.08965	5.75651	3.19489	4.61918	3.48271	2.10363	5.34866	5.8562	3.99603	2.87785	2.70527	0.767434	2.43605	3.1225	3.31832	2.96821	4.71284	7.29911	3.98525	3.28512	5.60172	2.11238	3.55144	6.47564	3.03783	3.73694	3.35589	5.4193
SEPHS2	32.8174	23.5937	31.8006	27.6677	26.9743	30.8791	27.3448	25.7685	26.7886	28.177	27.9332	27.9106	27.0284	24.1884	25.5376	34.8556	26.858	26.8328	25.9745	31.4889	25.8499	26.3848	27.2117	30.7043	35.4106	27.8806	28.0719	28.6979	31.3895	32.2468	28.3504	27.8884	25.9999	28.1442	26.1388	29.3856	32.8786	32.2614	30.4962	27.1242	28.6603	27.1581	25.3746	23.9845	31.0058	29.6642	29.7274	27.8728	32.275
CYP4A11	0.910443	0.259033	1.03803	1.66391	1.75618	1.19723	0.339707	0.183531	0.950298	1.16039	0.835745	0.52888	0.949796	1.72698	1.14489	0.726715	1.25284	1.1026	1.36621	1.06564	1.20417	1.54915	0.742056	0.899929	1.04256	0.730608	0.735254	0.483352	2.55308	0.762808	0.802396	0.775751	1.63219	1.48553	0.696983	0.652835	1.2444	0.861683	0.421184	0.829163	0.352296	0.89235	1.34365	0.702391	0.868354	1.28851	1.0136	0.627148	0.933109
ADCY5	0.0355979	0.931063	0.305524	3.16157	3.83352	1.36985	0.470839	2.13588	1.50739	1.91175	1.34314	0.965187	2.35143	1.48275	1.1322	0.577536	1.29972	1.46961	1.08426	0.641664	2.04587	2.19097	0.811487	1.90835	1.03694	1.46863	0.109286	0.319179	2.95929	-0.467272	2.46757	2.12765	1.22151	1.16584	-0.372113	1.34127	2.59308	1.2902	1.70481	0.546261	-0.332692	-0.229973	1.26578	0.889815	0.439286	1.20135	1.82373	0.0165983	1.38631
GUSB	23.929	20.6619	28.7942	21.8712	26.0466	22.3416	19.068	22.2913	15.5397	22.2205	18.2807	19.8847	22.232	21.9352	24.4953	20.0176	20.9049	23.9875	22.6145	22.3089	22.265	18.9857	20.9414	20.7412	22.8804	24.6932	22.452	25.0627	18.2241	22.6838	20.4616	21.409	21.3046	25.0244	22.2027	23.8008	19.8047	22.7961	24.2447	21.9706	21.7546	21.5427	18.792	18.5607	22.6962	21.7056	25.8564	20.7284	24.0772
CYP1A1	-0.0933091	2.15521	3.94138	1.62354	3.0224	-0.451149	0.241384	-0.223809	4.35283	4.48932	1.93149	0.207032	0.22538	0.684044	-0.0405619	2.0516	0.934429	-0.55171	1.16012	2.22596	0.592449	1.56691	-0.129581	2.71462	1.56205	-0.818236	1.2592	0.875085	3.33165	-0.51956	2.47993	3.20415	1.61095	-0.558748	0.638958	1.23297	1.72158	0.336862	2.22844	3.24119	0.922138	-0.0488472	2.40499	0.118796	3.16645	3.005	1.71035	0.706315	2.11677
GCLC	7.36518	4.30747	11.6159	15.743	19.6836	2.95076	18.2443	1.79402	6.03099	11.4853	17.5998	-1.48362	12.1832	-0.493971	20.8961	18.5867	15.8394	1.09369	14.7731	12.6871	10.3484	14.5636	4.75657	11.2318	22.7996	2.18071	4.04317	11.2643	15.143	7.25702	7.20573	10.1982	-7.16738	4.58203	23.3548	4.68705	12.9008	21.5861	13.454	12.4614	-2.14096	19.8901	15.7801	20.5192	18.4542	13.2442	18.8736	4.72773	7.43542
ALDOA	141.286	140.748	146.602	144.286	144.44	143.926	148.838	140.471	145.474	148.39	147.981	144.219	147.263	148.154	146.815	147.778	145.77	141.915	145.114	148.359	149.069	146.125	147.273	146.789	145.855	141.063	145.038	148.217	147.696	148.738	145.503	145.863	144.279	140.803	148.152	146.199	145.77	147.036	143.211	146.506	146.436	148.104	147.269	145.911	144.563	145.382	143.37	143.507	145.288
PIKFYVE	3.51125	3.48875	2.98688	3.38755	3.93849	2.85058	3.06528	2.89159	1.85371	1.68853	4.61448	2.21985	3.38995	1.86061	6.76245	5.1043	3.31263	3.92462	2.93948	2.7537	4.31664	2.31097	3.58167	1.74014	2.91137	3.60692	3.2987	2.29945	3.65621	2.76157	1.96478	1.69674	3.60427	3.1959	2.01856	2.80334	3.34921	3.2599	3.1988	5.0132	3.03833	2.87375	3.8255	2.84755	2.56782	3.50677	4.58003	2.75091	3.96533
MTR	5.9401	5.7742	4.98766	3.66831	5.38849	6.62286	2.34023	6.01512	6.422	3.04887	7.12795	6.20539	3.17408	4.75948	5.75783	4.57932	3.26671	5.57345	5.54838	4.94663	4.92803	3.00131	5.59723	4.11614	4.51896	7.14772	5.27818	4.90287	1.68697	5.71858	4.23058	4.37073	7.97751	5.14301	6.12649	3.96823	3.7461	5.19313	4.34896	3.99562	5.46773	4.33818	2.907	5.26188	6.00723	4.68073	4.4455	3.94387	3.54864
AACS	1.19449	1.85806	1.58886	2.55674	0.994546	1.49696	3.82909	1.55317	4.86921	3.85414	3.15341	3.00669	4.11256	2.78864	3.07098	2.94349	1.65871	0.906036	0.930604	1.55884	2.78865	3.71725	1.91027	3.46007	2.33943	2.03051	1.19252	2.13022	3.6864	0.904122	2.37023	2.89784	1.16924	1.72454	2.16101	1.90617	3.12991	2.58306	4.55184	2.4516	2.64097	2.86703	2.21401	3.11079	3.20497	1.16521	2.25149	2.00254	2.62783
FMO4	2.80551	2.91707	2.86072	3.11728	2.58108	3.19982	3.52454	2.7243	3.27235	2.93691	2.26336	2.55139	1.9843	0.583256	2.25101	1.69045	1.32309	2.67025	2.3931	2.83526	3.16592	5.29887	2.63357	5.17654	2.26936	2.6627	2.37605	2.48947	1.5541	2.11957	2.64133	2.40407	2.93222	2.95533	4.43183	2.80765	1.61861	1.89786	2.17657	2.43021	2.61444	3.89201	2.8465	2.91985	2.73761	3.16718	2.6029	2.56134	2.24377
GSTA4	17.6137	4.83863	10.1685	10.1923	15.4544	10.2907	14.8063	13.6764	13.0947	12.3954	15.4927	9.19444	11.7175	-1.45276	14.9418	12.4794	6.51782	14.6832	3.0439	11.8207	8.45787	11.5349	3.96775	12.6829	15.5462	8.89648	7.10502	5.60985	6.10914	5.29862	5.28755	15.6218	14.8169	12.9141	15.2545	2.51941	13.4373	13.9349	12.394	12.8063	14.4368	14.1872	10.3844	17.0092	15.7147	11.6227	15.1593	11.1996	12.5808
TH	0.617721	1.54762	0.587699	0.97367	1.03938	0.675532	0.807005	0.776539	1.35372	0.983458	0.626345	0.801888	0.744396	1.00347	0.834636	0.669625	0.862087	0.868946	0.578562	0.829086	1.19086	0.862515	0.69783	0.752427	0.719314	0.699449	0.622807	0.856453	0.792476	0.860418	0.669861	0.881763	0.749768	0.628657	0.837037	0.971307	0.880428	0.700669	0.810601	0.712203	1.26331	0.716166	0.984204	0.832371	0.737867	0.570945	0.654593	0.690794	0.69019
ALLC	0.754809	0.806291	0.836225	0.870305	0.900513	0.775551	0.841138	0.720355	0.859497	0.869285	0.889662	0.877789	0.855823	0.882914	0.793224	0.800929	0.923525	0.771487	0.81316	0.719356	0.858533	0.846194	0.827616	0.772294	0.807546	0.690132	0.840914	0.751183	0.828327	0.809039	0.721883	1.01939	0.797938	0.803879	0.667876	0.761245	0.789999	0.767756	0.830951	0.830666	0.698615	0.875908	0.787343	0.823197	0.848934	0.726955	0.924429	0.860238	0.870748
GFPT2	5.52863	6.40131	0.366604	5.65544	1.38284	3.63802	-2.85044	4.54177	4.68208	4.63392	4.14162	3.05982	5.36453	11.2322	4.47934	6.30779	7.94511	4.15367	5.12476	5.17805	6.32139	4.44328	7.47776	1.75158	7.35501	3.9881	8.63775	6.25861	0.316789	4.78374	11.0028	3.67449	0.378677	1.59202	8.59687	7.87492	1.1558	4.30882	4.20184	6.18501	1.44086	5.3009	8.24375	-5.37917	-2.0784	4.84153	3.84142	5.03145	7.68194
GPT2	15.3954	3.41389	14.7315	0.312582	2.89781	3.09008	17.6833	-5.25958	2.4988	11.1939	13.8775	0.784388	7.5837	12.1849	12.8281	6.75466	6.15506	-6.20805	1.46431	9.84795	6.68138	11.2486	-1.0512	13.8308	6.43733	-0.493353	-3.81508	5.31027	15.8106	12.136	-1.30737	15.6935	-6.36688	-2.35015	6.18915	3.48513	19.6827	6.22504	17.89	10.1059	3.49186	2.4459	4.16012	10.2186	8.42174	6.83647	2.54878	-0.727266	5.75253
ADH6	0.777961	0.621636	0.753227	1.01529	1.0682	0.722754	0.590345	1.00573	0.779878	0.878299	0.626699	1.64025	0.662197	0.689208	0.704111	0.712425	0.826276	0.711477	0.753582	0.541921	0.798157	0.897713	0.869147	0.838066	4.48262	0.736069	0.626241	1.08101	1.02874	0.973157	0.545177	0.996967	0.76784	0.698184	0.926576	0.76306	1.43934	0.648848	0.679557	0.861935	0.72086	0.713059	0.799798	0.931021	0.622223	0.922111	0.826849	0.767496	0.602811
ABAT	3.01671	2.74547	3.9496	0.770636	3.08502	3.46639	3.55002	2.61728	1.09752	2.82621	1.38107	3.25	1.4028	0.403592	0.589344	0.896391	0.761205	2.67494	3.05986	0.319223	1.34174	3.32001	2.49872	1.75072	2.99748	2.28558	1.79258	1.72712	2.08499	3.33778	1.82169	2.54912	0.730952	3.26209	1.09459	2.04474	3.22747	0.774366	2.47044	1.74526	1.83118	1.52283	2.45631	2.36237	0.665044	1.90207	0.459667	2.14902	2.41261
CKMT2	0.448467	2.21194	0.920049	1.77406	1.69041	2.61731	0.76746	1.46712	1.19195	0.748462	1.18751	4.25906	1.55097	0.716645	-0.157851	1.5978	1.10069	0.904814	2.18472	0.539344	1.8131	1.16793	1.233	1.65257	2.50041	0.713309	0.820505	1.94202	3.27399	1.67731	1.84469	3.24803	7.56551	0.258138	1.12733	1.98433	4.29107	0.337029	1.45275	1.47736	1.03224	1.85008	0.348266	0.498874	0.786809	0.995128	-0.0787272	2.41829	0.638299
AGPAT3	7.77654	8.14975	8.46649	7.74915	8.09402	8.98772	9.33079	7.87628	6.40316	7.19004	7.22616	7.85364	5.91223	10.1615	8.3129	8.04718	6.16422	7.67506	11.1221	8.68004	6.80535	7.59439	8.87463	9.6331	10.217	8.425	8.82025	10.5751	6.55774	9.50221	6.88404	8.95489	7.53286	7.04465	8.03297	9.18918	6.59463	10.3434	3.02055	6.31904	8.6764	6.26149	7.7099	6.80553	5.96508	8.45614	11.4175	7.01802	7.28734
CYP4F3	-2.98607	-3.85675	-2.07544	3.49791	3.63924	-1.61739	11.6072	-0.813829	-0.490763	-1.32813	11.3677	-1.81073	-3.15642	-2.287	14.2821	3.30657	-1.96465	-1.59682	-0.446471	9.208	0.455356	2.31718	-2.52233	-0.821452	9.77621	1.39423	-3.5684	2.01009	4.78413	1.40854	-1.777	4.01819	-2.5295	-3.89775	8.8183	-2.46352	5.92761	8.5326	-2.16611	9.13944	-2.09711	-2.42048	-2.24854	9.83065	12.5698	-0.633179	-2.73378	-2.00867	-3.6763
DGKD	7.00157	8.53861	7.56532	6.95934	8.8059	8.66884	1.46397	7.66116	1.15528	0.212567	6.57019	5.02859	3.85525	5.54457	8.66971	6.97028	6.84383	8.63644	10.71	7.10231	8.02339	3.11618	9.88776	2.1664	5.06377	10.1591	5.47525	7.3264	8.42156	8.98053	3.23355	8.38772	5.45168	9.10101	3.96248	3.92177	6.63928	6.4129	6.98578	2.59777	9.04583	1.91021	5.14805	1.99961	2.26943	8.10352	9.38527	6.52509	8.46152
CYP2C9	0.654319	0.589325	0.723807	1.11933	1.06001	0.688613	1.83586	0.493365	1.41807	2.06657	1.25595	0.734643	0.611672	0.965144	0.959021	0.596024	0.968499	0.886247	0.341595	1.08034	0.774348	1.85679	0.806732	1.93255	2.16875	2.01663	0.687838	2.14652	0.969256	1.32954	0.657789	0.892635	1.07418	0.787725	0.993901	0.633953	1.0721	0.518668	0.496656	1.04899	1.01942	1.34532	0.574228	1.9889	1.35917	0.859846	0.583859	0.976476	1.11615
SUOX	7.81214	5.56197	5.61415	4.36089	7.37496	6.81688	6.00715	5.42552	1.85346	1.53122	3.7282	7.25479	5.60711	1.83081	3.99555	7.36261	4.09717	5.1581	4.75103	3.94449	5.33979	4.35865	5.67095	5.8882	8.78307	8.10213	6.13211	5.91064	5.7574	5.86777	4.85294	6.09377	7.80753	7.53507	4.03775	6.20647	7.63701	5.89318	5.8843	3.38104	7.24233	5.71306	3.8869	2.73309	5.64693	5.81902	6.57948	5.079	4.77672
NT5M	0.2507	1.04485	1.54288	2.04113	2.72824	0.579189	1.32779	1.03256	2.0021	1.18352	1.69143	1.79956	2.11548	2.15896	2.01445	1.62375	1.50902	1.16858	1.458	1.28412	1.05811	2.02127	0.92088	2.32319	1.37006	1.01521	1.40643	1.30261	2.35438	1.20692	1.06834	-0.0187915	1.24631	0.531388	1.23258	1.84294	1.78172	2.68091	0.81279	2.20242	0.618084	1.17758	1.73722	1.95797	2.21503	1.09072	2.53468	1.3276	0.983655
SPHK1	0.0668355	4.76078	2.7567	2.80338	1.1475	-1.44895	2.0617	0.45061	6.8184	2.86881	6.6984	-0.516494	5.28445	5.45221	5.01994	4.61934	5.73725	1.31154	4.06251	5.52982	2.24853	4.7836	5.89478	4.68229	5.2062	-1.52051	6.27779	3.07762	1.26576	2.40292	8.65735	-1.11649	-1.31746	-1.59293	6.4465	3.88007	-1.66277	2.19329	3.34766	6.23022	0.368605	6.3312	7.97145	5.64215	8.52749	2.69649	3.47366	3.48595	4.02317
BDH2	9.16737	8.44088	4.68413	5.16082	5.94131	8.47315	7.43463	10.938	1.76605	6.36198	4.95108	10.5245	5.48231	3.97726	3.25407	5.02576	6.27228	10.5408	6.50932	5.15398	7.33145	5.50208	5.90068	8.46342	6.70396	11.0895	7.5863	7.94747	6.6874	8.88559	6.76373	8.08735	9.24824	8.28632	4.01994	6.30674	9.1939	4.15134	6.7741	5.37476	9.57005	6.49758	3.93249	3.17862	2.74777	9.14081	6.24014	8.24558	4.73115
PI4KB	14.8813	10.7543	17.0522	11.6502	16.2652	12.3604	12.7248	12.0844	12.0256	10.5488	12.7298	14.7618	12.1652	10.8346	12.4844	17.6618	11.2543	11.5772	13.6962	10.7847	10.6781	11.5025	14.2901	13.4866	13.6999	12.571	11.8281	13.2483	13.4752	12.2042	12.2077	13.2181	15.7598	14.8049	12.2678	15.1817	13.5902	12.6046	14.8058	11.738	11.1504	13.9375	10.957	14.7762	11.9995	10.8895	15.9321	10.6176	14.928
MDH1	12.6211	16.3238	17.4532	13.4147	13.55	12.3222	19.468	13.5558	17.1401	14.7973	17.6634	15.0153	15.6028	13.244	18.1212	17.6334	12.8543	13.8139	13.8334	18.5805	11.8745	17.267	14.6006	17.7587	15.7472	13.8341	14.0253	13.4573	12.5743	14.0551	14.3225	14.0517	12.0705	11.1546	15.8597	14.9051	14.5499	14.2628	16.5478	17.4295	14.1682	16.9712	14.7002	17.2248	18.5077	16.0133	15.5732	14.1499	14.1164
GLS	24.3983	17.2263	22.7779	15.9244	27.4308	21.056	13.7193	19.1535	24.6965	17.0715	14.3801	17.139	16.3423	13.8925	13.6276	19.392	21.7431	19.4738	20.9252	14.7827	16.3759	15.341	21.7886	13.5864	15.8064	19.1113	18.0875	16.6282	10.9258	14.7876	21.3734	17.6781	26.3861	26.0754	15.3819	22.385	20.7431	14.3714	15.8945	17.785	15.2233	16.9473	16.7462	13.5961	15.698	17.0001	17.2886	20.8081	17.9877
GUCY2C	0.486995	0.100097	0.668231	0.284022	1.39502	0.49521	0.400539	0.533032	0.914772	0.567243	0.697159	0.942297	0.580653	0.965235	0.888436	1.28134	0.458401	0.559553	0.940603	1.19719	0.771292	0.798685	0.895825	1.11707	0.197601	1.26722	0.825219	1.23668	1.53098	1.22753	1.06166	0.391496	1.37298	1.03824	0.572204	1.41723	0.705263	0.664281	0.87296	0.246372	0.13418	1.02757	0.275985	0.968539	0.494205	0.548495	0.391095	1.56042	1.17512
GSS	21.1546	19.8597	21.8597	19.5348	18.6243	19.7623	19.6881	16.8952	22.1	23.2444	21.4946	16.3056	24.9492	19.6932	22.3934	21.9418	22.4421	17.6574	18.6922	17.1336	21.1488	21.2811	20.7682	21.4727	22.2785	16.9846	19.3622	20.3686	21.579	19.2853	20.0506	19.5186	14.2141	16.1833	22.4285	18.1616	20.4862	17.5247	23.2075	20.8334	16.8141	19.0342	20.0363	19.5061	24.8827	18.6525	18.383	19.3327	22.1051
PHOSPHO1	1.39693	1.00989	0.645955	1.2509	1.35855	1.15571	0.998632	1.22385	1.05461	1.55232	1.54521	0.658082	1.39729	1.63006	0.772307	1.22633	0.864051	0.723119	0.670022	1.09754	1.27767	1.19842	0.810184	1.12721	0.940128	0.348529	1.13715	0.479428	0.956654	1.36436	1.35643	0.92988	0.935782	0.916526	0.660465	1.67064	1.23081	1.15448	1.39135	0.616789	1.11272	0.790424	1.56024	1.40648	1.13722	1.51195	0.760201	1.21758	0.974267
GFPT1	17.26	15.1957	23.0912	12.8427	18.7626	15.1638	11.5101	11.0746	10.514	10.8138	7.25063	18.5766	12.732	18.5091	14.9742	20.0953	10.0967	8.07082	18.0803	14.342	16.8482	10.8851	16.2214	14.4615	17.9224	14.2642	17.1149	20.2069	20.9967	16.8641	13.7347	20.331	17.3294	15.6438	9.76092	19.1421	21.2409	17.2805	14.0078	13.0761	16.5497	16.4708	14.6543	13.071	18.7111	12.7634	19.4056	12.4021	19.148
ADH1A	0.964961	0.895713	0.978835	1.12233	1.13845	0.906294	2.05634	1.09854	0.660369	0.770249	0.679968	1.04541	0.685492	0.657102	0.552436	1.00674	0.943261	1.05141	1.02307	0.886212	1.92798	0.956794	1.01491	1.02581	1.0511	1.35751	1.13668	1.04918	0.674089	0.850628	0.683804	1.13291	1.2446	1.07788	0.698181	0.899307	1.09647	0.876681	0.673677	0.915999	0.938696	0.593025	0.712215	0.7248	0.791731	1.26322	0.753791	1.09874	0.887019
ASAH1	59.356	57.5073	55.3899	52.5725	56.3582	56.5508	49.9669	57.9602	50.2628	48.5104	49.4091	57.4383	54.0386	50.8782	51.6534	54.305	53.3221	57.8284	57.266	53.2003	52.3341	51.2314	54.029	55.1865	56.0935	55.8786	56.7943	55.2419	56.8643	55.4907	53.3765	57.9531	57.6577	57.6888	48.5975	55.8951	61.7674	54.4744	55.5606	54.0547	57.3954	50.766	49.2202	47.3739	50.4003	56.3086	51.3885	56.939	54.5518
SPHK2	1.77727	1.51065	2.2951	2.87718	2.14939	2.07237	1.9666	2.61386	0.870844	1.73994	2.32912	1.81533	2.35958	1.44853	2.52614	2.16831	2.14629	2.28505	2.12692	2.21306	1.72728	2.27132	2.45651	2.22645	2.79837	1.84363	1.72584	1.33889	1.67609	2.59295	1.75343	1.59492	1.65934	1.6147	1.49792	1.82459	2.87219	2.20717	1.52964	2.13886	2.05354	1.3302	1.96215	0.909065	2.57252	2.88881	1.91963	2.2241	2.33747
ETNK1	4.57042	6.42658	9.99247	5.2621	1.77978	4.84237	12.3251	5.58374	9.30153	2.85663	5.03764	9.21673	9.21192	8.36894	7.06554	7.4657	4.78172	4.0465	5.88281	9.20236	6.1068	7.98924	5.20176	6.12398	10.5957	6.20761	7.097	6.92637	7.79075	6.2697	6.55216	6.58644	2.45775	4.94166	8.01596	9.52267	8.72238	6.51697	6.57568	7.74059	6.0137	8.71825	6.51463	7.60241	9.09844	4.35715	0.0707862	6.55271	6.86986
PSAT1	4.48313	7.78347	10.861	8.95149	10.0523	3.80931	20.8677	-6.47865	14.5483	15.3316	19.7523	-1.82158	10.1224	15.5902	25.2844	-1.60404	9.89048	-9.62394	1.51115	11.8066	4.54137	14.4016	9.47189	17.0439	4.45507	-5.82989	11.8618	4.06929	7.13209	-5.83543	8.53627	4.00553	3.32914	-9.16397	15.8602	11.673	9.77921	9.84649	11.4333	19.8689	3.74218	13.2388	13.3916	17.0385	21.83	3.19955	5.42652	-0.864743	11.6416
CYP2C8	0.983485	0.589667	0.867089	0.784462	0.853235	0.743017	0.750155	0.729233	0.845138	0.797792	0.714796	0.673943	0.719747	0.79437	0.742105	1.05273	0.939785	0.87915	0.909109	0.791596	0.755375	0.68263	0.864593	0.778088	1.49559	0.781911	0.776804	0.808808	0.945026	1.07267	0.853083	0.862018	0.772654	0.767936	0.76538	0.7375	0.745529	0.688588	0.93322	0.724668	0.833537	0.704463	0.75531	0.726078	0.705275	0.855147	1	0.80979	0.896036
NIT2	2.99764	2.5188	6.34532	5.15257	4.85006	2.88334	7.51749	3.00708	6.59251	6.70081	3.66357	4.78123	5.77751	5.80177	5.86542	5.46416	4.12664	2.93536	4.2832	2.85849	3.51598	5.56277	3.68949	7.37064	4.62363	3.19392	3.63559	5.36872	3.6568	3.49558	4.19158	5.0594	2.33587	3.50775	5.52457	4.31766	2.86966	6.79124	4.08045	4.28663	3.4195	3.36077	2.34266	6.00674	5.52822	2.46379	2.9473	4.54293	4.35143
ANPEP	9.51854	9.90403	12.0921	12.8521	7.86691	12.0271	9.74323	13.2356	11.0944	12.398	15.9127	11.0583	9.1767	8.19659	6.28018	4.82707	13.8838	7.79799	10.9689	11.8562	10.2026	10.461	18.3742	9.95854	11.3728	12.1449	20.0269	9.04459	9.52327	12.4682	11.8502	6.17654	23.4716	22.4837	12.1232	5.01663	5.70906	8.11455	10.5089	8.44891	23.2555	11.5604	13.1341	6.81469	9.42293	17.0914	7.65427	6.47021	10.3973
UGCG	13.2026	18.5413	11.7374	13.8014	8.69026	15.2841	13.8598	14.5648	17.2642	20.258	15.7229	19.0063	14.9537	22.7122	15.7981	12.6601	14.9207	12.3813	15.4695	14.7462	9.74689	19.7579	16.517	9.05089	16.4311	18.3919	17.3677	13.2611	9.35587	17.7486	15.4613	11.626	14.8622	19.4648	18.9982	16.1715	11.6587	14.1069	13.4119	17.178	12.8319	19.7324	15.6905	16.7125	15.5998	12.5395	16.2869	15.3755	16.0982
P4HA3	2.15889	2.83179	2.11425	3.7517	3.05524	1.63175	-0.284731	-0.134434	2.34591	2.54176	0.220356	0.894952	2.44575	3.70496	1.58376	1.82064	3.68913	1.31162	3.47831	1.83946	1.91414	1.70121	2.89228	1.53116	2.79594	1.06728	3.13613	4.14341	3.47725	2.78409	4.92048	3.6008	0.441673	0.293816	1.67878	1.90848	4.47185	4.49696	4.77535	3.01163	1.24834	1.89339	3.624	0.366604	-0.256318	1.61019	4.53931	1.55407	2.72766
MGLL	22.087	21.3766	25.2941	14.4228	15.4656	21.6728	14.4655	24.888	12.9584	21.9253	20.3858	26.3538	15.7147	15.9599	12.9883	18.9719	15.9297	22.9104	22.3015	18.1932	21.3749	15.5104	23.9145	16.5256	17.6389	25.003	20.1778	24.8688	21.1704	23.966	14.1611	22.0259	28.5992	23.9996	9.45971	17.4562	19.8033	16.2877	10.1287	20.0998	24.1188	13.7609	15.6938	21.4416	18.0654	21.7639	18.1539	21.3194	18.0118
NEU4	0.985156	0.945992	1.11357	0.582764	2.40037	0.84745	0.791341	1.04146	0.965896	0.930243	0.626203	1.24612	1.0037	1.46293	0.838392	0.887648	1.26436	0.855538	0.934096	1.10639	0.6167	1.42543	1.19285	0.858745	1.65991	0.962221	0.89537	0.359588	1.58162	1.51179	0.833207	1.89879	0.684019	1.21765	0.743595	1.01183	1.77303	1.2548	1.10361	0.542979	1.11453	0.656904	0.737574	1.1278	0.916724	0.912832	1.52373	1.21102	1.29656
CYP2D6	0.480582	0.420175	1.62789	2.74013	5.30974	0.955707	0.126263	-1.2205	2.59018	2.20828	0.666002	0.463754	0.711809	2.92625	1.27846	0.612767	2.08336	-0.14222	1.9728	2.8764	2.58599	2.75564	0.897871	2.0551	2.0544	0.98715	-0.223373	-0.702419	3.47589	1.00145	1.28733	2.83835	1.13895	1.16002	1.61782	2.91667	2.35968	1.77814	0.843055	2.018	2.2399	0.746642	1.7601	2.08958	0.476808	0.994553	3.54403	1.50455	1.78733
HADHB	20.3058	20.0037	22.2413	17.923	21.3071	18.3212	19.3007	18.9315	18.7891	18.5036	18.9206	20.1126	17.2604	18.9364	17.6945	19.8142	16.2177	19.1175	19.0786	17.9491	17.6529	18.3858	19.3003	19.7341	19.6624	17.8865	18.5894	18.5501	17.2198	19.2001	18.4822	19.1506	18.513	18.4499	18.2541	19.7139	21.99	18.7542	19.4763	19.255	17.7153	20.9538	16.7632	17.3894	19.0482	19.7204	17.1953	18.1671	18.3721
TK2	5.91205	6.00061	4.93835	5.17876	5.22665	7.12012	2.34399	6.08474	4.67217	3.38423	3.55484	5.73075	4.14075	3.79365	2.66637	4.44054	4.65165	6.72823	6.54212	3.34036	10.4114	3.41512	4.71786	4.81801	5.00993	6.44551	6.26648	5.39811	4.80774	6.29168	5.24508	5.62707	6.12922	5.30999	3.53522	6.1267	6.58242	3.70387	3.90737	4.40978	8.00988	3.80455	4.59948	2.68126	1.80617	6.48493	5.07004	6.58689	4.06476
CKM	2.15942	0.51307	1.4067	0.131343	1.69395	0.418282	0.346546	0.498691	3.00595	1.06364	0.359426	1.06314	1.77444	0.265383	0.666166	0.732799	2.88009	0.733803	1.13084	-0.14363	2.245	1.19561	0.897858	0.71675	-0.393837	-0.218542	3.27442	0.578082	1.48859	-0.543102	1.32001	0.995929	1.04135	-0.00872569	0.164925	1.873	0.418385	0.792839	2.31056	0.604681	0.154672	-0.0210445	1.10421	-0.0433092	1.05041	0.728875	0.569364	0.759064	1.26912
SULT1A2	4.64765	3.3698	3.03464	2.80589	3.8867	5.04233	1.39636	5.85476	0.767692	1.37436	1.11036	3.11566	2.85646	2.00965	0.250485	3.53766	2.6897	5.96053	3.93036	2.56224	1.75432	1.36444	2.31013	2.47041	2.94511	3.55278	2.91859	5.67988	5.88243	4.26962	1.90936	5.83003	5.31757	4.08527	2.1995	4.35561	5.38731	4.41262	0.819388	2.86213	4.2803	0.992029	1.17429	1.06829	1.09843	4.42753	0.536719	4.49005	2.31977
ACYP1	0.190846	2.36849	1.31469	2.62938	1.16257	0.726867	4.69319	2.28498	2.09886	2.8745	2.67779	1.57345	2.48742	1.39806	0.755353	3.29838	3.09663	1.90088	0.6757	3.41179	1.12985	3.55691	1.13268	3.37077	1.84499	1.23618	2.05031	1.46602	0.910382	1.1869	2.84153	1.43658	2.06367	-0.166401	2.48565	1.61604	1.75702	2.14493	4.10358	2.53124	2.00113	3.18221	3.72253	2.71485	2.93833	0.709361	1.98226	1.39357	2.07039
ACO1	13.4151	14.5058	11.4663	9.38219	8.82198	10.6235	6.31326	8.76468	7.4548	5.97616	6.14036	7.80227	13.5646	7.87279	6.0426	8.67872	7.40746	9.89364	11.3705	7.75413	15.1109	9.84727	8.44148	7.04243	6.76751	8.75487	7.93228	8.26892	8.25308	9.65899	9.29813	6.24325	11.5716	8.13267	6.62853	7.41796	16.3216	8.59188	6.11704	8.00152	19.3816	6.17349	10.1952	2.93623	4.70135	8.31443	9.21012	8.03483	7.43909
POLR2F	1.09835	1.08121	1.06674	1.03554	1.02329	1.0225	1.09771	0.999556	1.07373	1.11663	1.09578	1.05536	1.14262	1.10772	1.13005	1.10627	1.08038	1.03641	1.07474	1.1114	1.06174	1.05536	1.04019	1.07169	1.05917	1.0271	1.06886	1.01165	1.04609	1.0495	1.08014	1.05389	1.0795	1.01652	1.06498	1.08135	1.07886	1.03823	1.09754	1.10893	1.0425	1.10669	1.15714	1.15932	1.13174	1.06103	1.0295	1.07099	1.05764
MTMR2	2.94447	4.59367	4.49381	5.05936	4.13588	1.59028	7.20964	3.83932	6.81562	5.11309	4.98538	4.07002	6.44161	1.98295	8.47059	14.4123	3.24698	2.20947	5.00439	6.26042	4.11538	3.53566	3.77459	7.7208	4.09128	3.49128	6.45086	6.63929	6.0216	5.44623	8.71618	7.65689	0.630511	2.01203	4.66075	4.06089	7.55385	8.17073	5.76609	6.33964	3.01321	6.63145	7.79025	6.47542	7.81754	3.74689	5.21249	2.35483	5.16625
MTAP	2.48667	4.16298	3.59564	0.778064	2.44501	1.46993	4.08382	2.10531	-0.0719163	4.05497	3.60481	3.60848	2.50617	0.740157	5.06846	2.76986	3.55669	1.7655	2.74191	2.55815	4.0558	1.08018	1.9153	3.46037	2.15601	2.86417	2.35467	1.27908	0.247658	2.7792	3.49522	2.2253	2.85234	2.43296	3.01172	1.80612	2.28959	5.02143	3.51659	1.11443	3.14363	3.77415	3.04443	3.24472	4.18322	1.64186	1.96291	1.76891	1.55619
PNPLA3	1.22001	0.927569	1.69258	0.954378	0.833101	1.21053	1.38285	0.798276	1.68918	1.15231	1.42329	0.979874	1.28355	0.691991	1.38247	0.654147	0.864657	2.06062	1.80527	1.11885	0.79498	0.825425	1.21291	0.957011	1.66948	0.821898	0.829251	0.85407	0.99997	0.900602	1.26822	0.841936	0.76897	0.925464	1.17282	1.04261	1.08421	0.947886	0.85113	1.12275	0.936639	0.928253	0.938182	1.6949	1.45264	1.41857	0.881596	1.06633	1.36159
GALK2	3.26198	1.8621	2.37172	2.62206	2.85885	2.18755	2.65707	3.37057	2.87868	2.60607	2.2926	3.52791	1.44361	2.97517	2.67783	2.80734	2.06494	2.99226	3.00598	1.74311	1.77566	2.04756	1.70234	2.53064	2.77588	3.00175	2.87637	3.82545	2.12782	2.85591	2.69564	4.28314	3.4122	3.5409	3.53876	2.2324	3.75497	2.39466	1.05571	2.28133	2.68652	2.95733	2.84339	2.72861	2.18272	2.67688	2.14585	2.53762	3.13214
NMNAT3	1.21925	0.712983	1.2157	1.73983	1.48689	1.18354	2.43384	1.15168	1.91201	1.94497	1.93487	1.69689	1.65628	0.796121	2.12928	0.908087	0.88187	1.2567	1.15165	2.02904	1.21732	2.20873	1.43303	2.48756	1.65968	1.23204	1.29301	1.07255	0.941788	1.14865	1.42579	1.40078	1.38516	1.40518	1.48538	1.30749	1.41148	1.39537	1.60819	2.27778	1.25634	1.5192	1.15506	2.5138	2.894	0.874878	1.5113	1.43137	1.31745
CHIA	5.57201	11.8086	13.8989	-0.118785	7.91414	8.77946	-1.38408	15.5286	-1.4839	-1.95595	-0.0447907	12.0355	0.980247	0.517603	-0.89273	1.33988	-0.162844	16.0794	22.1176	-0.510128	1.81218	2.76262	13.1834	0.497419	1.14603	12.4861	8.01447	5.8119	11.3403	7.10752	1.02597	17.9646	15.0602	7.81982	-2.55468	6.73998	21.3636	2.15552	7.07662	-2.22968	9.80271	-0.144208	-2.32026	-0.983859	0.415295	14.5861	0.377464	12.1106	11.3068
SGPP2	15.0884	26.935	15.8227	17.4628	4.60835	21.3532	25.3122	6.79805	4.69488	19.8159	22.9269	23.2943	15.9409	3.5775	25.0065	23.5459	14.9448	3.40589	26.5493	21.07	31.0122	26.7209	24.4216	18.5076	26.58	24.64	15.2773	25.4688	22.348	19.3351	18.1017	18.4195	22.3054	17.2753	15.5386	11.5984	26.4412	27.4767	6.03138	14.0996	25.2802	19.7507	23.3124	24.5145	21.937	15.0235	29.4278	26.5672	14.0976
IDO1	22.7057	8.46201	6.98604	26.9075	9.3084	19.6162	18.0669	11.9842	1.7866	11.8181	5.63502	25.1392	14.4863	13.7537	5.89218	18.7881	17.3315	11.3441	7.43145	11.9885	8.20052	9.23786	9.90662	5.01444	11.5327	10.871	17.9983	23.5564	7.15277	13.2675	15.7147	3.20854	4.86583	4.2703	22.7135	30.8984	10.9817	29.7969	30.7241	8.3775	20.5744	2.86175	22.2962	0.23203	-1.76394	21.24	27.2544	25.7127	18.5234
DGKQ	3.31459	3.7225	9.39711	4.52494	4.92872	5.4499	4.38546	5.46316	6.43337	6.77127	5.18668	3.34194	4.99819	4.58905	3.26604	2.34146	4.85336	6.28689	6.21639	4.20726	4.37063	6.59631	7.40555	4.58206	6.22725	4.81228	4.27038	6.64229	5.35064	8.7123	4.46335	6.63438	5.16134	7.22895	3.12029	6.79178	6.54303	5.57834	4.2004	3.64452	5.31101	4.30853	4.07343	4.34866	6.16616	5.32341	6.68568	5.914	5.81202
CANT1	16.5887	23.8669	21.3184	16.0196	14.397	16.019	17.663	14.4236	19.1326	16.1093	21.0362	19.0074	16.4656	19.4955	19.8892	20.3081	16.879	13.2755	19.9319	18.6319	20.5105	15.7272	23.3359	17.3214	21.5804	20.8428	16.2463	17.6946	21.4446	17.7755	17.6639	17.6566	14.9	17.3384	16.646	21.5348	19.828	18.529	18.8245	16.7792	20.6758	17.4224	16.1435	18.7614	17.9521	15.0136	15.3175	20.2189	17.6768
PIK3C2G	0.198765	0.739303	0.534425	1.53467	0.786251	-0.213351	0.300726	0.18083	2.77066	0.972087	1.6394	0.262551	1.01907	1.0283	0.624139	1.5949	0.553487	0.345618	0.455006	-0.294763	-0.472255	1.4685	-0.584295	4.14876	0.128308	9.7579	0.692963	0.289998	3.15502	-0.0906297	0.0242025	0.773927	0.335279	0.231694	0.205644	0.308134	3.63923	3.679	0.374667	1.51973	0.250125	0.187266	3.64511	0.381802	0.763942	0.00499474	-0.103166	-0.0951049	0.444458
POLR1E	3.95478	4.45206	2.24259	4.98969	5.12491	3.0963	4.48856	3.76402	10.518	6.74415	7.32553	8.34014	5.67114	5.7316	9.03812	5.70715	5.09243	5.87212	5.20982	4.84241	5.40827	5.70139	4.49419	5.74291	3.14821	6.77626	4.94318	3.62682	3.1111	4.87835	5.75142	2.65009	6.55966	5.66953	5.39605	4.41005	4.13083	9.38963	4.64612	5.33545	5.3084	5.44048	7.17413	5.34552	6.65839	2.73094	3.91845	4.50657	3.8588
CA3	5.13254	3.47879	0.907502	2.41606	1.84579	5.27189	0.914907	9.34331	0.620969	3.03741	0.185042	3.30048	0.860368	7.65362	0.847246	2.57804	1.45137	8.62969	5.93995	2.22322	2.49401	1.67423	0.598258	0.460568	2.22503	5.50733	2.5924	4.00974	1.03736	1.68867	0.932231	0.688775	0.746613	0.948677	0.795465	5.699	1.16383	0.846462	0.498285	2.54373	2.57086	1.60075	0.485453	1.73553	1.11763	7.34823	-0.381395	11.5424	5.26604
HAL	-0.503435	0.428677	1.43546	1.07843	0.821587	2.07233	0.23148	2.12014	0.237469	2.89866	-0.398175	0.143589	0.68267	3.84494	0.192003	5.97958	1.47066	1.7949	6.6227	-0.214555	2.04602	-0.0707827	-0.0595024	-0.607053	1.66087	2.42692	2.32317	-0.093749	8.69831	7.12339	-0.0486371	5.38996	2.0559	6.06212	0.243749	-0.00339385	8.44085	5.79326	1.49493	-0.039933	1.38296	-0.16247	0.633967	0.355921	-0.115557	1.46139	5.57565	5.46903	10.4648
PDE1B	0.820539	1.40367	1.20068	1.00475	1.67313	1.46644	0.713749	0.911174	1.11045	0.799718	1.09581	1.39001	1.30158	1.53201	0.490094	1.75568	2.19368	1.14753	1.13975	1.07022	1.38128	1.63339	1.33618	1.3729	1.55047	1.29756	1.19323	1.25395	2.36998	1.01524	1.57761	1.94761	1.07606	1.17523	1.22026	1.42421	1.2734	0.749924	1.05837	0.906298	1.40126	1.17084	1.78107	0.977845	1.75131	1.75751	1.51234	1.54285	1.47975
CMAS	9.80767	12.1217	11.3078	14.4202	12.081	10.7109	16.4931	10.2521	18.3073	12.7219	13.685	11.9198	14.6188	19.4518	15.225	11.6391	11.5414	12.1675	11.9591	17.0938	13.8701	15.958	10.4816	17.0426	14.007	11.4252	10.0215	12.1595	12.0207	10.364	13.482	13.7873	7.78714	12.6348	19.0317	13.1127	12.4157	16.1293	11.6142	14.0856	11.3453	14.6723	12.858	13.06	14.2013	8.44401	6.33062	14.1316	8.43483
NUDT12	3.69386	3.38403	3.01972	2.41656	5.85036	5.7325	4.24186	4.68149	3.2546	3.77321	5.35018	4.96726	3.0848	1.89678	3.50954	3.55067	3.766	3.99506	4.17049	2.76914	5.20362	2.377	5.00442	3.15261	3.4731	4.16355	3.34149	2.63788	2.82082	3.33249	2.01465	4.88646	5.83373	4.48108	2.63688	3.88483	5.04804	2.93276	3.2995	2.62362	3.28761	3.45482	1.81388	3.68661	-0.757103	3.63499	2.02869	4.47026	1.8605
CSAD	3.95129	1.45768	2.99618	2.94988	6.17678	6.12073	2.83066	3.78768	2.48318	3.87503	4.37033	3.12988	3.01535	1.41651	2.89086	2.3004	1.53301	5.1131	3.06548	3.23859	4.7753	2.62346	2.17702	2.33737	3.60353	4.22473	1.5402	2.14769	3.82343	1.55029	2.50504	3.47257	4.65285	7.1191	7.26466	2.1832	2.44377	1.98133	2.4192	2.46145	3.74952	3.66032	5.13812	3.32647	2.01141	4.1139	5.77102	4.08576	2.19808
HIBCH	3.89071	4.14759	7.04104	2.73036	5.80495	2.61177	4.9121	3.64384	7.3298	3.20393	4.3472	5.09599	3.00062	1.76128	3.19517	3.81116	3.17084	4.05787	2.3313	2.36992	3.06911	4.66971	1.40835	4.3098	3.48004	3.88813	3.43469	4.10419	3.1551	4.02155	3.26007	6.57155	2.06224	4.25223	2.03747	3.24723	4.18884	5.131	4.39268	3.62908	3.71612	3.92252	2.78897	2.54916	4.32985	2.42205	3.77558	3.34823	6.08846
ADH1C	13.7516	8.43773	1.75384	45.558	46.6673	5.32384	56.6923	19.8411	-5.11993	5.92724	18.1654	18.229	-3.25531	-1.8686	-1.91334	48.8989	10.9975	20.3731	3.38976	0.433721	53.2011	37.0119	-4.48444	44.5186	48.1002	48.7537	3.84278	22.8138	23.2402	12.3605	-0.243506	45.5248	49.6838	24.5719	16.3402	4.81817	46.9785	48.884	-2.07451	0.688286	29.1426	-2.97485	-2.45876	0.495439	22.3622	39.448	-3.69332	12.3354	5.87306
WARS	35.4829	35.0991	35.6165	36.2944	35.3723	33.3668	37.7545	37.4139	28.3065	32.074	33.9262	40.2291	39.4128	38.6419	34.7996	40.0301	40.821	40.4007	35.0793	39.0142	36.1513	35.9821	38.5584	36.5148	36.0642	35.4303	42.4649	46.3299	36.0361	37.9301	36.83	34.6341	37.1973	30.9244	39.0857	46.9014	36.8487	41.8091	39.7818	38.8079	34.2738	34.7929	44.5053	34.4038	38.328	38.2695	38.2062	43.6003	39.2557
CA9	3.42889	4.14773	4.26587	6.85048	4.04826	0.0889921	0.0290658	0.54146	25.0113	15.4556	22.0353	5.49919	26.5619	6.13132	15.7803	2.90735	10.1852	3.09883	6.46105	6.53592	10.49	14.1837	1.73718	7.77848	7.26848	16.777	-1.73408	10.7493	10.2848	0.0504417	17.928	3.41803	1.12691	0.78628	8.1489	3.16664	1.3499	3.42976	9.48637	12.6545	12.539	19.5891	30.9085	3.32819	1.54283	14.0163	2.67805	5.75333	2.96274
HYI	5.50852	1.7732	4.53636	3.61273	5.45824	5.64049	-0.959798	4.78072	1.29112	-0.0506771	-0.161323	4.88423	3.57789	1.4563	1.45108	2.64742	2.39089	6.05902	4.09433	4.46464	4.96876	1.85403	2.02794	2.59806	4.52661	3.98576	3.54068	4.12126	5.10169	5.00245	3.81168	4.8232	6.6354	4.81227	-0.114298	4.07329	3.23006	1.14287	2.13609	1.4213	4.45728	1.69834	3.16743	-0.0848311	1.18672	4.00898	2.31701	4.24976	3.82315
DCK	5.77913	6.06401	6.28339	4.71082	-1.3039	5.93125	10.2946	4.28781	9.06895	7.60907	6.64384	7.56386	7.49263	5.31981	7.55274	8.71401	9.10602	5.87567	5.11614	10.7158	8.20533	7.69378	6.51787	9.78556	5.87095	6.06526	8.06725	6.09932	6.00353	5.47031	5.57715	0.488801	1.17149	4.79325	2.46074	9.52173	6.02858	4.5089	8.29135	8.66933	5.70684	7.80732	4.40499	13.6956	9.53514	4.42396	7.00015	9.23218	7.53076
ALDH18A1	19.3636	19.8752	18.9696	22.6479	25.5993	19.6563	17.6854	12.178	23.3836	20.9268	16.7834	21.7318	21.3193	25.3404	21.2309	23.0556	19.92	10.6625	20.0234	19.6931	15.3837	18.5665	20.7419	18.7532	19.4356	19.6857	20.2351	22.291	22.4792	25.131	21.9181	21.5546	15.0332	18.3079	19.4327	20.4314	22.2771	19.6119	20.6613	19.0546	20.513	19.6762	19.6287	17.3895	19.189	14.7977	20.3375	15.6326	24.4216
L2HGDH	1.67939	1.79925	1.74949	1.80563	1.32234	1.12221	4.31961	0.60356	4.62453	1.78356	2.97423	2.42403	2.89703	2.19286	1.80405	2.37879	1.54417	1.42924	1.65946	2.10507	1.41192	2.4737	1.47434	3.08572	0.383774	1.3066	1.60236	1.66968	2.03787	2.26824	0.982484	2.20658	2.33111	1.14326	1.97996	1.86725	2.38906	2.56852	3.38517	1.7174	1.26934	1.37432	1.76963	2.0744	3.58439	0.954578	3.52294	0.841716	1.816
HMGCS2	11.2145	0.613729	-0.181137	-1.27894	6.7715	2.176	-1.51617	-2.38938	-1.00744	0.71244	-1.14919	-0.99459	-2.82076	-0.27529	-1.0286	-2.23652	-0.865178	2.20225	1.75935	0.768675	0.10744	-1.60523	-1.57358	1.81532	-2.14314	10.4841	-3.92337	3.72299	7.02309	4.55175	-0.40332	8.76803	1.13408	-0.435544	-2.3785	2.46538	1.46427	-1.12709	-2.42814	-0.933206	-2.66779	-0.321347	-1.28037	-0.995005	-0.399508	4.3774	-0.774976	2.27912	0.724197
ENTPD2	-0.468343	-0.490812	1.33158	2.19366	2.99365	0.266443	1.33272	0.393799	3.17642	1.82112	1.98357	0.785038	1.89064	3.5128	0.464268	-0.0197963	1.3195	-0.829276	0.407708	0.755144	0.878217	2.20708	2.3009	0.899564	1.6936	1.13929	0.419642	1.75855	1.58111	4.37693	1.03003	1.45104	0.830672	1.18744	0.235588	-0.0671456	0.396781	0.369445	1.47299	1.16124	0.54175	1.31575	0.84231	2.12505	1.83229	0.841317	1.11773	-0.725028	0.972019
TPI1	127.822	131.171	132.744	132.314	129.151	127.377	131.942	127.83	135.468	133.497	135.282	131.816	137.693	137.74	134.263	132.12	132.127	127.65	131.484	134.465	136.178	132.022	132.939	131.689	130.756	129.941	131.019	134.167	132.852	131.281	134.405	131.656	129.536	128.563	136.46	133.77	131.572	135.458	128.603	134.645	132.295	134.211	135.542	136.119	133.349	129.683	128.905	131.565	131.016
PLCD4	1.07684	1.05488	1.1327	1.12141	1.15779	1.25416	1.02303	1.10414	1.26007	1.17361	1.2922	1.07142	1.40138	0.971492	1.09912	1.06054	1.09808	1.11877	1.07865	1.15171	1.17831	1.12862	1.111	1.36033	1.16603	1.23804	1.11285	1.03765	1.2129	1.12323	1.01513	1.11795	1.10715	1.09509	1.09254	1.12913	1.21872	1.20209	0.882316	1.06185	1.06492	1.1627	1.04015	1.0539	1.10886	1.31635	1.01187	1.0576	1.09406
PNLIPRP1	0.709218	0.768155	0.884997	0.754749	0.931109	0.74162	0.74852	0.731044	0.825909	0.790658	0.817111	0.768195	0.867203	0.818126	0.810386	0.757995	0.828903	0.771245	0.743708	0.765751	0.839286	0.801654	0.769491	0.809671	0.798705	0.764354	0.783124	0.729172	0.918355	0.729921	0.756505	0.849266	0.821692	0.784991	0.823891	0.777156	0.782324	0.859936	0.776519	0.731559	0.844623	0.801385	0.801718	0.760536	0.785384	0.820186	0.776778	0.738673	0.801351
COMT	20.7541	18.672	16.7318	17.902	20.0584	18.2245	20.9639	19.6585	17.9567	16.7209	21.1329	17.417	17.4884	19.4443	15.8299	21.192	20.5334	18.4691	16.9605	18.1564	17.5391	20.5425	17.8218	18.4539	18.2954	16.8963	18.576	17.0345	17.4824	18.1093	17.9437	18.7884	14.1119	18.2278	17.1601	18.3648	22.6656	15.5345	13.8766	21.2532	17.126	19.0902	17.826	21.3796	23.8614	18.879	17.295	17.9019	17.6291
DHDH	3.53984	1.89531	4.37707	-0.0476342	2.76671	4.35841	2.30934	1.49366	4.93962	2.67562	2.71947	4.72518	6.12005	-0.109129	0.229997	3.54145	1.62771	3.1244	2.24185	2.27313	-0.145796	0.962218	4.94099	3.87711	2.63807	3.49272	3.72329	0.677362	0.917062	2.10898	-0.386118	2.35501	4.49805	4.21688	0.781882	3.24584	1.35595	1.15818	2.18351	3.14894	4.91305	-0.607064	-0.292055	1.80377	1.19929	2.22135	0.21079	1.29912	2.45082
PAFAH2	9.18933	7.98047	9.5274	3.77658	8.72526	8.68133	5.84372	6.97032	4.55719	4.31977	3.3769	7.59155	5.83868	7.22171	3.73951	6.33413	5.06165	6.21253	8.94806	5.04097	5.29608	5.70498	4.54623	7.8299	8.57006	6.31472	5.95047	7.94765	5.69607	9.65936	5.32674	8.35212	6.13546	4.81923	3.37012	7.25098	7.06184	5.82522	5.17653	3.59595	7.36392	4.86509	5.15373	3.39095	5.39729	5.28687	6.40546	6.41128	6.17142
PDE11A	0.710324	0.774909	0.722037	0.727436	0.920363	0.691254	0.749889	0.620605	0.801841	1.09552	0.949055	0.769016	0.822052	0.698215	0.728821	0.690033	0.812827	0.711925	0.842048	0.685233	0.769936	0.713534	0.813906	0.786736	0.778591	0.764339	0.821973	0.79961	0.883461	0.99752	0.758697	0.956008	0.790329	0.761021	0.74936	0.782356	0.810841	0.833544	0.770607	0.803796	0.784837	1.16769	0.809006	0.867195	0.766585	0.765006	0.769928	0.708956	0.731472
NT5C3A	6.29963	6.55292	8.46453	4.34729	6.0295	4.46872	6.16559	7.11047	9.81432	7.29686	6.78575	5.78851	9.95679	7.41578	9.15227	5.27136	5.7941	7.16307	2.68077	6.01372	5.8945	7.21221	6.23444	6.46048	5.59866	6.42241	5.5815	5.83152	6.58391	9.9612	6.26639	5.39071	3.99273	4.21648	8.95191	7.74234	5.10287	6.00074	9.38813	3.56658	5.35463	10.1218	8.81127	4.90658	6.589	10.3052	7.53817	9.75641	5.03431
PNLIPRP2	0.700257	0.705123	0.711001	0.696058	0.709149	0.728867	0.683855	0.724779	0.701635	0.724596	0.703923	0.722275	0.782677	0.810579	0.759053	0.704838	0.802919	0.709242	0.755413	0.770922	0.767157	0.705421	0.741163	0.752813	0.693598	0.732393	0.831978	0.680747	0.753143	0.899374	0.765031	1.21289	0.707967	0.760168	0.735269	0.780286	0.742803	0.760291	0.811903	0.779166	0.74914	0.710766	0.778106	0.809682	0.677142	0.746284	0.743312	0.733342	0.785448
PDE6B	0.582284	1.20963	3.72564	1.8222	3.17788	1.67597	1.16534	1.26905	1.00885	0.804428	2.4906	3.52602	2.33277	2.30269	1.52749	0.815687	2.55102	2.00125	1.22545	1.7883	2.09021	1.31233	1.45468	2.13293	1.33106	1.65031	2.19289	2.88401	2.87434	0.803883	1.11348	2.35028	2.59212	2.30052	0.250371	1.9305	2.52898	1.82456	1.42811	1.13048	0.85779	0.955901	0.931319	0.980405	1.29555	1.65695	1.34989	2.30467	2.49827
OPLAH	7.36578	5.82769	4.47887	5.50984	7.04595	6.64489	7.02206	4.28439	8.63244	0.113679	4.5883	7.19797	6.10579	10.7363	3.79641	4.88696	5.8981	4.60266	6.31246	8.43185	4.88699	6.9019	3.83623	7.27675	6.32079	1.97286	5.02232	6.47185	9.04536	7.45764	6.45716	10.3326	3.20202	1.89111	4.49744	2.37562	10.7283	8.30711	5.08069	6.69444	1.44194	3.99504	7.22857	7.58059	7.0597	9.20853	8.72684	3.1827	2.90934
PIP4K2A	10.0208	9.6123	11.3843	9.35446	6.80944	8.07023	6.52788	9.65057	3.67125	1.86096	4.06888	10.1608	8.02249	7.62135	11.2319	11.4211	9.63481	7.76348	9.0999	7.46093	6.8695	7.23955	11.7976	8.05397	9.44832	9.51944	12.638	8.94199	8.59477	8.92638	8.94125	6.7302	6.8935	7.34039	6.24865	13.9612	7.12793	13.0705	9.97806	7.57561	8.79208	10.9513	6.09847	4.73741	6.05376	9.69188	13.603	12.1982	10.1835
CYP2J2	3.98628	3.75809	4.80249	1.70985	1.97941	2.79394	4.45109	3.27527	3.05883	1.91096	1.50096	5.67658	5.49035	1.19687	1.81139	3.04404	2.155	-0.268099	2.21774	3.11853	2.31385	3.42778	2.90848	4.68761	5.1426	7.1488	2.79453	3.87969	4.38125	3.07087	1.87977	4.14842	1.03899	5.68153	0.173692	2.82245	4.00844	5.32179	2.8582	2.40573	1.24382	3.13778	2.53112	2.16711	3.04954	4.06659	3.3079	4.19482	4.6087
PCK1	-0.160196	-1.06152	-1.07553	-0.557628	-0.174593	-1.2999	-0.393905	-1.00113	-2.12369	-0.631339	-0.834239	-1.0727	-0.384415	-1.12147	-1.507	-0.330434	-1.00969	-0.734292	-0.716719	-0.345547	-0.563659	-0.448617	-0.945583	-1.11205	-0.107088	-0.661737	-0.905837	-0.0895556	0.0550535	6.75992	-0.334685	-0.791429	-0.510784	-0.288984	-1.0849	-1.12657	-0.138865	-1.38338	10.0423	-1.51469	-1.21204	-0.726516	-0.647839	-0.816166	-1.60377	-0.661416	-0.883963	-1.53965	-1.18818
ACER3	5.24257	4.73136	3.04466	4.30352	0.477272	5.23043	6.30081	4.51222	5.06578	4.79651	4.24436	3.73449	5.05124	3.37713	4.84416	10.8852	3.12122	5.66327	4.41325	4.53899	4.00869	4.06324	4.06301	4.32456	3.76919	4.26533	5.54082	4.28173	2.72067	5.65971	4.75676	2.1901	1.61443	4.32515	3.50679	5.3421	4.5082	4.70781	4.75372	5.06587	6.54984	3.93351	5.99051	4.66192	5.78967	5.78875	6.36485	3.99906	3.89486
SYNJ1	2.68148	3.08529	3.00186	1.947	1.65523	3.26616	3.46207	2.97192	2.31798	2.03532	2.53587	1.9122	1.64724	1.7094	2.07819	3.15206	2.14029	2.94267	2.9726	2.50646	3.04045	2.12759	2.56803	2.23835	2.15552	2.66285	3.5262	2.29394	1.43367	1.96243	2.73193	2.00722	4.31573	3.01704	1.59724	3.2249	1.32007	2.32533	2.9469	1.56799	3.01712	1.91453	2.19556	1.19846	2.59873	2.57541	2.28932	2.16235	2.88771
CHKB	3.71285	2.52489	1.414	2.48963	2.50161	2.59683	2.2215	3.04998	2.15611	1.8042	2.24539	2.22062	2.50921	1.86244	1.68371	1.10199	2.90804	3.37579	3.51081	1.70135	3.42242	2.35984	1.88916	2.11752	3.50797	2.45136	2.67747	1.6896	3.18322	2.30865	3.14877	3.44728	3.24116	3.53999	1.78136	2.29911	3.16301	1.29006	1.12258	2.07466	3.03861	2.4384	2.39307	2.94347	2.24801	3.00867	1.85954	2.59922	3.49952
RDH5	0.970811	1.02664	1.10645	1.12535	1.18286	1.05731	1.24962	1.02002	0.813794	1.09417	1.0774	0.809913	0.889306	1.24335	0.883754	0.993512	1.30901	1.36961	1.07612	0.983246	1.14124	0.854815	0.844436	0.961531	1.12024	1.01229	0.720695	0.96577	1.44346	0.885132	1.08256	0.840071	0.874746	0.955306	1.1293	1.25323	1.23519	0.651018	0.681764	1.00553	0.933014	1.07312	0.928378	0.972689	1.01158	0.835815	0.940023	1.31745	1.26815
AOX1	2.60425	4.73616	1.44131	6.25217	3.68121	2.80648	-0.172679	9.55587	1.54165	2.02895	0.441529	4.95571	-0.202763	0.585993	1.1725	1.46078	6.72696	13.5429	5.9307	3.38827	-0.927526	4.90325	3.61306	1.62346	6.63984	4.8426	6.27654	4.0781	2.90627	1.6368	7.63116	5.93484	1.35539	0.581441	1.59065	3.64807	4.21165	-1.59386	6.02083	0.310898	-2.52256	0.617017	3.18753	-2.32836	-3.35107	10.5513	-2.14389	6.37148	13.8026
LDHB	109.463	117.575	114.634	106.031	112.404	113.318	114.35	111.361	111.09	111.155	112.492	113.704	105.599	114.742	113.517	113.875	109.938	110.605	110.165	112.513	111.536	110.749	111.521	97.1967	112.097	112.59	113.19	112.421	111.133	109.621	107.491	114.651	112.338	111.658	113.597	108.551	114.199	115.713	112.385	112.095	101.768	108.491	113.836	110.763	114.15	108.994	103.154	114.628	110.242
MAT2B	11.8204	9.54045	11.9413	13.1288	15.4153	13.5188	17.0036	12.8073	11.254	10.3048	14.4502	15.5801	12.2037	17.3192	12.187	14.5342	12.33	12.6644	12.1849	9.30301	14.8538	12.5067	13.4306	10.6534	11.8365	13.0466	14.1438	15.8551	8.85799	12.8207	12.4017	13.6364	15.7694	13.0691	8.79127	17.3501	11.5952	17.3117	11.7272	11.8156	14.3377	10.6605	11.7839	11.0998	12.6411	12.0672	8.88471	14.7293	14.7372
MTHFD2	4.55491	8.58643	10.47	12.0756	7.83025	4.72289	15.2561	2.40103	16.0896	11.5867	16.1902	12.8545	12.6402	17.5753	21.1706	15.2135	10.6251	3.13573	5.45431	18.8461	11.112	11.8825	12.3766	14.0655	10.114	5.88187	13.1653	10.5629	12.609	10.0276	13.0689	10.3481	2.43665	2.32029	13.6379	15.5933	13.8414	14.7699	14.424	15.7925	9.91928	9.77205	12.1926	13.6546	20.2396	8.99982	11.0952	8.60255	14.5041
CYB5R3	29.6456	27.277	21.5183	26.484	27.2096	26.6572	27.0201	28.9864	27.8011	28.1971	29.8528	27.051	27.7672	28.4618	28.5462	26.5496	24.1501	27.3006	30.0048	28.3173	25.3299	27.4701	25.9363	29.2911	28.3587	32.2388	29.1637	28.4433	24.3922	28.4442	28.8496	29.3769	27.545	23.5301	25.8933	26.5907	29.3083	26.4306	25.1655	27.7175	25.5589	28.2991	25.5817	29.9851	27.8838	29.2752	18.8616	26.3456	26.7982
ADPRM	2.07478	2.61177	3.30101	3.48078	2.9918	2.52238	3.14994	4.00282	2.8582	3.68867	3.27762	5.91869	2.97588	3.45787	3.1846	3.06498	2.52228	3.72015	4.4976	1.84091	3.12758	2.7587	3.13379	3.94528	1.19461	4.14675	4.3492	3.61128	1.07709	3.01015	4.41333	3.52311	4.05367	2.85324	2.08502	4.23594	3.53301	4.18092	4.37677	3.04339	2.73647	3.39795	5.23376	2.96842	4.27168	1.78019	1.71958	3.96779	2.30685
NPR2	2.98851	2.48851	2.76763	2.77129	1.31838	2.64561	0.786947	4.16232	1.10178	2.73896	1.9712	2.36371	3.39176	2.30529	4.67772	2.37954	3.38481	3.66802	3.63091	1.08517	2.245	1.55828	2.29805	1.85748	2.75286	3.99375	3.29485	2.59243	2.29628	3.20776	3.2124	1.9428	2.6477	3.89441	2.1752	1.83448	1.50955	2.08252	1.91299	2.56777	1.93381	1.20871	2.63032	0.543396	2.37624	3.39291	1.78207	2.43905	2.00663
PIK3C2B	6.11935	4.21054	3.78671	5.74511	3.22175	6.22897	4.04376	6.60532	6.03288	4.35243	4.75941	3.21631	4.91445	5.75389	4.04623	4.36313	3.69239	7.24833	6.15772	4.72108	5.94991	4.13724	3.01776	4.82543	5.76393	8.12248	4.57571	5.84862	3.95609	5.77967	3.67232	6.32395	3.75153	7.48926	3.10498	4.69387	4.74931	3.25495	3.85942	3.56583	5.06241	2.37869	1.59757	5.16556	3.49676	6.75321	2.51007	4.08782	5.36555
CDO1	2.05009	1.8027	1.61898	1.62343	1.34642	2.57156	0.198162	4.60034	0.396327	0.992558	0.503818	2.76571	0.907984	0.558308	6.30169	1.09304	1.82553	4.29115	3.0806	1.26408	1.56494	0.983332	1.987	0.908484	3.40873	2.70389	2.53969	1.60701	0.749233	1.0156	1.36676	1.20106	1.37726	1.47773	0.770556	2.14715	1.37072	0.957177	2.18573	0.955232	0.614603	0.003897	0.332206	0.0354023	0.521927	2.92308	1.02303	4.04738	1.82474
POLR3C	8.07155	10.171	12.6434	4.82054	10.364	7.52861	10.2875	6.85281	9.22635	5.94998	3.06127	13.41	8.77944	10.514	9.77551	8.14635	2.98503	5.39599	8.25647	7.65197	6.83591	5.96605	10.495	8.32535	8.70309	6.61545	9.05775	8.35383	6.26861	6.89581	9.17056	10.0615	12.2151	8.03533	8.5162	8.70703	8.78545	14.0106	13.6411	8.0024	6.37247	7.816	8.38191	11.163	8.73286	5.99154	9.3089	7.12653	9.10971
MAT2A	21.4478	22.5342	23.3377	21.7988	21.3478	23.1154	25.9203	22.1655	20.1591	21.3035	24.4452	27.1293	21.6995	20.4496	28.8976	23.7731	21.9707	21.92	23.8497	26.2597	22.7848	21.9337	23.7007	23.5871	25.6378	23.7879	23.6264	25.1462	20.976	23.5589	22.5049	24.2427	24.7054	25.9162	21.8958	24.4189	23.675	23.9347	24.1706	21.6085	23.3893	21.5723	24.7657	24.1269	26.2736	21.8602	16.1692	23.5958	24.1879
HK2	8.8753	9.45909	7.49888	8.87242	15.0711	8.18915	17.8503	10.515	19.3335	22.0744	19.4045	9.60132	17.1921	15.1798	18.4601	8.25431	13.9457	13.6548	11.2947	15.857	14.0915	12.5084	15.537	12.0922	10.4676	4.87281	11.1694	11.544	12.6757	15.3157	11.8812	2.18049	8.93118	8.87012	20.3776	13.2105	0.727987	15.1908	10.3391	18.4832	11.5428	16.6246	17.3862	16.093	11.6385	14.5336	10.8796	11.8288	9.64627
AK1	7.77138	12.0351	8.08632	3.50525	13.2043	10.9701	1.98256	11.7558	6.45884	4.52348	3.59966	4.6272	4.88999	7.45108	1.80334	3.88939	6.8145	11.5055	9.08494	5.46423	11.8277	4.51738	9.02767	3.74043	6.52889	10.6804	6.69593	6.48493	2.88054	11.428	3.49997	8.36477	17.5983	12.1533	4.75194	10.2596	5.15932	4.43333	5.23275	5.96239	13.317	5.93371	2.05952	4.37316	4.9829	10.0845	7.90208	5.84225	6.44545
CHIT1	32.1687	18.0042	7.13065	1.70206	1.7158	24.2492	1.893	10.0653	-4.39756	-4.82207	-1.65936	29.3936	22.2105	-0.686623	11.9296	7.73183	13.2627	17.5488	10.2523	14.8346	7.29757	10.1993	34.1164	13.9931	18.9628	9.00406	20.0823	12.3027	12.4532	30.6848	0.968193	2.65152	18.6037	10.7168	1.15307	27.334	3.26119	25.2237	16.3703	27.2497	5.68033	20.3635	0.111939	-0.243812	-3.45373	9.09214	17.1251	21.2294	19.2597
GYS2	0.699711	0.545995	0.687483	0.619341	0.849806	0.676654	0.621531	0.694671	0.806765	0.746904	0.803463	0.514624	0.597552	1.06898	0.811117	0.867631	0.632223	0.632779	0.656477	0.586628	0.752961	0.644737	0.626831	0.54597	0.650476	0.779808	0.598684	0.669836	0.579008	0.735818	0.644714	0.872636	0.809189	0.520461	0.673046	0.701922	0.999372	2.06845	0.893179	0.636582	0.536368	0.742646	0.739918	0.577016	0.378079	0.772985	0.653128	0.690369	0.815767
GLDC	2.14204	-1.26956	2.20096	1.60391	-0.531788	-1.02551	0.198002	-1.46525	-1.58759	-1.03142	4.28032	0.0105775	4.25869	-1.48149	-0.237178	5.58385	2.96909	-0.812173	0.141253	-1.9851	0.173883	-0.85753	-1.76801	-2.55956	-1.25209	-0.578774	-0.353898	0.76812	2.73306	-1.11894	-0.864399	1.53684	-0.207961	-1.97113	0.306903	2.64457	1.3238	5.0323	10.1944	2.82467	-1.69522	1.3295	0.430611	-0.32227	4.14227	-0.543856	4.63447	1.02861	1.57007
PYGB	42.4997	40.3228	41.1729	36.3285	42.6316	39.8845	38.8081	37.685	36.2819	40.5829	37.4832	40.8603	36.8035	32.7269	36.1271	37.1624	38.2775	38.9887	43.5631	35.3118	37.1044	37.7589	39.1876	36.6483	37.8134	39.4114	36.6335	36.1557	44.0479	37.6649	37.2275	42.5575	43.6976	38.6812	38.6974	37.1912	40.8403	37.1178	36.9331	38.316	36.8799	35.1027	44.4281	38.0306	36.4974	40.7187	39.0581	42.9402	37.1094
SRR	2.47392	2.1342	2.206	2.05086	2.194	1.65649	1.81281	2.38072	2.4443	1.28038	1.13688	1.75157	2.05457	1.70491	1.85936	2.05606	2.49701	1.68685	2.4189	1.89566	1.74341	1.34356	2.2417	2.41037	1.2908	2.31398	2.49853	1.81489	1.08141	2.236	2.40012	2.21579	1.73584	2.22706	1.68459	2.33775	1.97337	2.37867	2.48076	1.83573	1.80847	1.27094	2.86523	1.13035	2.65158	1.6019	1.2972	2.13152	2.34607
PFKL	14.451	11.5238	14.8576	11.7768	11.7418	14.4454	19.2458	13.0606	15.7248	15.199	13.494	12.8887	18.4612	17.0446	13.2279	13.0863	12.9778	14.5002	15.3667	18.1923	17.9019	16.8692	14.8832	16.356	15.904	13.8609	14.0529	16.3452	16.9638	15.594	15.6203	12.7035	12.7943	12.8676	15.1936	13.0491	12.1736	15.811	11.3526	15.135	13.1066	15.4307	14.994	12.7673	10.1883	13.4322	16.0203	12.8737	13.5921
GALE	17.3852	14.9948	20.0976	15.8323	19.4003	16.5545	17.8231	11.9846	19.2244	15.3222	8.53495	15.3107	14.401	20.1491	9.9611	13.5314	16.7038	13.5604	17.2484	13.8188	17.9551	15.0215	14.7092	14.3761	22.3093	15.793	13.9595	18.7915	18.1475	16.1252	11.734	15.8834	16.3824	16.4561	15.6216	16.1333	16.3508	16.1534	17.4475	11.1212	17.6133	14.9534	15.1069	10.8858	8.29637	15.2253	14.374	15.6054	15.1761
GPAT2	4.74141	3.92741	1.33444	0.320281	0.909916	0.371894	3.63958	0.743177	0.839751	4.20697	1.46928	0.976887	1.3959	0.24451	0.0106731	1.22096	1.86646	1.65885	2.91092	3.06267	1.09706	1.51808	2.69474	1.41105	5.58532	1.46448	3.07561	4.70542	5.58644	2.13294	2.58376	1.58647	3.98329	5.24402	0.808803	2.15703	1.69115	0.836411	-0.355838	1.30389	-0.0148562	0.660142	3.66199	-0.368694	0.935579	0.164236	0.704867	0.725905	0.913853
CS	15.8486	16.241	15.5042	16.5921	17.7192	16.8444	18.3023	16.2192	15.454	16.6658	16.8918	18.0675	17.935	17.144	17.7524	17.3612	15.3508	15.7215	14.6616	18.5092	17.146	17.9633	16.5093	18.2143	19.681	14.9758	17.5299	17.1185	15.0805	15.886	15.9811	17.1322	19.1134	16.4926	20.202	18.4394	18.2606	18.627	18.5847	16.2674	16.8915	21.0732	17.2539	18.5822	21.7124	15.8847	15.6367	15.6875	14.5377
ACHE	0.910357	2.80575	3.27747	3.00355	7.13757	5.1382	2.04783	1.05283	1.50501	3.68158	2.03541	5.53201	3.83181	4.91813	2.27935	4.99618	4.53521	2.57584	2.22963	2.69845	2.09534	2.2629	8.43927	1.49825	2.5367	5.47628	1.85513	3.26135	10.3661	6.8599	1.5992	2.59606	5.09953	13.921	2.14602	3.88806	2.21616	2.19288	2.12562	2.05598	6.61824	1.78254	3.96613	2.36969	2.74157	0.288799	11.8407	3.79063	4.70325
LPCAT1	92.2064	89.7494	96.1798	84.6926	82.1892	93.1887	70.991	91.763	75.6091	80.4771	81.3417	86.9858	87.0306	81.0257	75.4041	91.7765	89.1779	92.6402	90.3497	85.6563	84.015	79.4682	95.4819	81.5109	83.3203	86.1393	91.2932	94.0876	90.9099	90.751	81.7857	92.4067	94.2256	91.3142	78.2449	92.7843	93.1814	84.9051	86.1953	81.946	93.235	81.5833	86.6257	75.1401	69.2064	91.4852	95.4259	95.608	86.6351
ALDH3A1	13.0656	-2.26094	2.11021	45.3891	46.8062	4.35866	42.7696	8.34689	26.298	32.5872	40.0316	13.4866	20.4266	-4.39961	42.8063	13.3064	1.00349	5.07201	32.7443	12.0308	-0.187036	29.6827	1.51576	25.7644	-1.21864	9.22686	1.91273	24.4276	35.1138	5.47522	5.46894	47.916	-0.906031	13.1396	47.029	-2.04179	17.0134	26.0088	-1.61306	35.8048	2.83773	36.9689	17.7248	39.9847	43.4885	23.0317	2.00422	3.48841	5.0674
ADCY1	0.55244	0.793076	1.88708	0.869858	2.13442	1.05266	0.775972	0.549404	0.9912	1.26837	1.53372	0.478092	0.445477	0.66173	0.77719	0.673494	0.978839	0.942531	1.00216	1.02544	0.694115	0.932342	1.09977	0.612463	0.909437	0.38382	0.677223	0.705431	1.14783	0.625587	0.496556	1.26934	1.76448	0.618362	0.521545	0.920997	0.950245	0.577095	1.40167	0.415312	0.559184	0.799025	0.703056	1.20431	0.614437	0.969807	0.857646	0.496095	1.37574
POLR3F	2.95645	4.26662	3.0428	2.58259	1.62338	3.36706	5.07607	3.32427	3.84002	5.12936	3.71963	3.22482	3.34958	1.06978	4.3823	3.24193	3.75838	2.86053	2.96248	2.72806	1.04118	2.1867	3.44456	3.9349	3.26647	2.8087	4.1244	3.59837	1.65204	2.34907	4.34515	2.13461	2.12181	2.93048	1.62949	3.03746	3.25139	2.91451	4.51656	3.53304	0.944919	1.65336	3.61348	6.21608	5.17688	2.23035	3.0635	3.587	3.45123
PDE9A	4.63748	4.97816	2.9309	1.47398	5.10239	4.14042	4.15739	3.0555	-0.267436	3.13605	2.16473	3.60766	3.51201	-0.557117	3.08726	2.88454	0.695154	3.80885	5.20797	3.94159	1.72573	4.25099	3.45388	3.36434	2.12769	3.93327	4.48446	4.61396	4.71391	5.42112	1.91311	5.01285	4.62897	5.75252	4.23622	3.61983	3.00897	2.62139	2.18102	3.4727	4.51688	-0.535635	2.4647	4.0722	3.82142	3.94935	6.3809	4.32567	2.9647
UCK1	6.65891	7.70864	7.78471	4.69617	7.32301	6.27526	7.36605	6.82672	5.90781	8.10507	8.28363	8.98526	7.15659	8.85524	7.92452	8.01337	5.61231	7.1108	7.12309	9.20037	7.43411	7.78457	7.88504	5.87549	6.68079	6.64258	6.78297	7.03899	4.9025	7.93199	7.30929	4.77996	8.46654	6.51935	6.26431	8.45019	6.13557	9.16778	8.11726	8.22046	7.93437	6.73797	5.87701	10.302	8.59848	6.96349	3.92971	7.04317	6.11676
HGD	-0.598567	-1.0831	5.56135	4.02337	24.5712	2.81267	0.338454	1.38507	0.650377	0.308578	-0.496418	2.92643	-0.722785	0.28236	0.348333	19.3125	1.05251	0.207496	6.48293	-1.00852	11.1497	0.355574	1.60168	-0.825213	25.3874	6.85777	0.835985	16.7577	14.9629	13.7454	-1.37601	20.4023	8.68365	3.35941	0.624192	0.363859	22.7118	16.6837	12.2193	-1.60288	6.87225	-0.521093	-0.0811492	2.02124	0.0322224	1.30947	11.0353	2.22955	13.5402
POLR3GL	12.5964	13.8964	14.3662	10.9737	11.5287	16.2079	10.77	14.205	8.09527	8.62356	9.33847	16.3207	10.0975	7.04639	10.3343	10.9714	10.4191	14.0821	14.534	8.43102	13.6171	11.1979	13.8736	10.6458	9.67068	14.2464	13.6444	11.3619	9.48656	12.4312	9.76757	13.2314	17.0484	14.5809	8.35363	13.612	11.5887	11.3765	11.4792	10.9154	13.3775	10.6602	6.36731	9.93502	5.90594	11.3241	13.6005	13.5454	13.4153
ACADVL	36.1183	33.1096	36.2531	32.3935	38.5014	31.5922	31.6635	34.4109	29.9023	29.7621	30.5116	32.0047	32.5808	30.7454	28.4745	31.7477	32.8797	35.2746	36.9181	30.795	35.3714	29.4277	32.8931	34.7229	35.2297	35.0114	31.3237	35.2037	36.9935	32.3181	32.8014	36.3341	33.8843	35.686	33.7672	31.9293	36.5452	34.2882	30.221	30.1161	31.6321	31.763	36.6266	31.0428	32.9593	33.5484	32.2544	30.0022	31.8379
CYP2A6	1.18223	0.993924	4.30759	4.27091	19.8652	0.632234	0.248626	1.44639	2.18588	3.00727	0.0614005	-0.17298	1.11857	1.45229	2.119	1.24269	3.01036	0.31146	0.587795	1.31463	2.7302	2.89284	0.901498	1.1627	3.00506	0.101023	0.847947	-0.587019	5.06053	1.85491	2.9215	2.40138	1.82603	4.00012	2.07982	2.11823	6.07083	27.2809	1.87705	1.1634	0.67841	1.86171	2.72278	0.600415	0.11829	3.16031	2.64247	1.80601	2.02175
ALDOB	-0.149194	0.741986	2.05414	1.28502	5.23686	1.28848	0.886357	-0.0793322	1.2901	0.758116	0.265092	1.65142	0.913238	1.63658	0.94401	1.0874	1.67507	-0.498613	0.00166529	0.316641	2.96336	1.03608	0.578475	0.822995	1.2981	7.50228	0.406208	10.9856	2.65403	13.0313	0.593875	1.07014	1.43236	1.30641	0.549178	0.890581	1.58751	2.28353	0.894491	0.827509	2.43374	0.757136	1.37345	0.469412	0.87829	0.583583	1.04879	4.37127	1.03664
FLAD1	7.15072	9.78542	16.7726	5.59276	12.2302	5.49844	12.2992	4.16662	10.5026	9.25729	10.9039	10.6886	12.2365	8.91611	14.385	10.6905	6.43899	3.36486	7.50254	9.08364	3.00339	8.61037	11.9837	13.1994	9.81398	4.36844	7.32567	8.50086	8.64435	11.489	9.26034	11.1909	9.57765	5.0294	10.1412	9.67891	8.55343	10.8279	12.1692	8.04044	4.95761	11.9798	6.89394	14.7426	14.1659	2.87714	10.7285	6.24818	12.2273
GSTM3	8.54183	2.7335	6.7674	-0.474184	2.82869	8.25231	15.2008	9.777	11.4421	6.88424	12.9769	4.28255	5.86954	4.52757	12.6061	10.2506	-0.96899	4.14976	4.10374	10.5127	-2.15869	-1.8474	4.17242	8.79596	3.64485	5.26951	6.12396	2.03161	6.7657	3.75016	0.510511	1.22294	-3.30534	-1.11918	12.4696	-2.24966	-0.24344	1.29042	3.58032	8.93923	-1.79212	7.48093	1.14197	12.2918	14.8447	5.05118	3.86958	5.72278	7.97502
ARSA	16.1196	13.4993	13.8757	17.1664	20.037	14.6225	14.4685	11.5041	13.9352	9.7204	13.7612	10.9316	13.9796	14.2555	13.0073	14.0563	14.9895	13.1736	15.5267	11.9901	18.3958	10.7222	12.1718	16.5549	16.0638	11.224	12.5883	15.3204	15.8725	16.3167	16.3561	14.3384	18.8358	15.4107	12.2243	14.0032	18.7497	9.78636	13.4855	15.2572	16.7732	14.4683	14.2463	16.9081	13.4072	12.2459	12.6667	14.3109	15.2433
DGKG	0.878655	1.03697	1.23169	1.37503	1.09864	1.24187	0.826362	0.947679	0.828604	1.036	1.66402	0.813553	0.964625	1.32497	2.27462	1.13998	1.26646	0.795546	1.27427	0.925096	1.13535	0.815548	1.2037	1.04642	1.00896	0.952095	0.889233	1.13601	1.95678	1.06406	1.02273	1.22026	1.02555	1.01573	1.22587	1.55233	1.32561	1.37959	0.999205	1.49389	1.42723	1.03617	1.1472	1.72422	0.986334	1.19473	1.32815	1.13445	0.977085
OXCT2	0.79393	1.16189	2.098	0.939262	1.286	1.09223	1.37841	0.974558	1.01695	1.14971	0.951644	1.03685	1.19946	1.02469	0.869572	0.821486	0.942912	1.07544	0.749039	1.13527	1.05153	1.12866	0.867133	0.83772	0.800762	0.945675	0.913919	1.02241	0.918781	0.913181	0.99147	0.875401	0.895938	0.935515	0.778641	0.87498	1.16268	0.956883	1.03917	0.660646	0.992716	1.0547	0.828258	0.772054	0.931351	0.911337	0.799772	1.08675	0.99224
GLUD2	0.943092	1.40938	1.88076	0.80886	1.31495	0.896041	2.1991	1.14626	1.69742	1.5596	1.35444	2.27311	1.25708	2.24252	0.118732	1.34759	1.12918	0.869767	1.64884	1.21687	0.697997	1.66581	1.54994	1.23107	1.93948	1.07371	1.64195	1.75887	2.08908	1.76176	1.30713	2.35416	1.10392	2.06949	1.34271	1.77496	1.43752	2.87236	2.13472	1.60467	1.09914	2.52098	1.80789	2.30019	2.03409	1.16295	-0.191823	1.94719	2.56694
UGT2A3	0.750389	0.565116	0.48145	0.637004	0.493222	0.401562	0.580489	0.61785	0.75653	0.969819	0.734804	0.812781	0.436626	0.807277	0.768794	0.643835	0.811884	0.835587	0.956453	0.924588	1.28954	0.748752	0.741586	0.555887	0.432743	0.917069	0.671215	1.08799	1.07287	0.718865	0.437126	1.10045	0.580333	0.373706	0.179129	1.0038	1.03339	0.931042	0.875883	0.74162	0.849491	0.721892	0.788775	0.496891	0.658653	0.920273	0.812236	0.735568	0.693095
HMOX2	12.6494	9.95555	15.3884	9.93321	9.37682	11.812	15.7948	9.71036	18.0335	15.0023	13.2499	12.505	11.7875	12.7538	11.4213	8.409	10.8403	10.1979	9.57539	8.94548	8.33682	12.9126	9.04527	8.81094	9.86	9.07249	10.8511	12.1125	6.23377	13.5272	12.6924	9.62316	10.0701	10.9813	10.2418	10.5779	10.4849	12.4584	9.238	11.5393	9.73224	11.8596	11.7401	11.5827	14.7343	8.18551	5.41222	10.1304	9.63114
PKLR	0.777315	0.788738	0.892808	0.928178	1.12094	0.855183	0.748886	0.759015	1.05298	0.919151	0.842014	0.79311	0.895508	0.921638	0.889184	0.835586	0.899498	0.811505	0.811261	0.859175	0.756323	0.913574	0.847833	0.832311	0.859904	0.780478	0.741533	0.822142	0.885393	0.713177	0.829834	0.90074	0.844878	0.740754	0.865966	0.771682	0.911293	0.787548	0.805097	0.815961	0.777448	0.821216	0.851616	0.835193	0.834855	0.807638	0.78921	0.824209	0.850051
ALDH1A2	2.39434	1.04671	-0.378734	0.25115	4.57998	1.49881	1.30827	3.33772	0.0311346	-0.248899	3.1064	-0.0994578	2.95844	2.33238	1.58288	0.408737	2.23843	1.97411	3.15204	3.92941	2.01775	1.52268	2.26516	0.549333	5.66355	3.20604	1.951	2.88416	2.81351	1.85255	0.484412	2.30219	0.034986	-0.907088	1.64267	2.42067	1.74371	13.7827	0.833944	-2.02531	0.147018	0.279295	0.147373	1.10925	1.68376	1.24755	0.144767	0.687532	1.31315
SUCLG1	11.5865	10.8803	11.924	9.77733	10.6793	9.80388	12.0516	10.5032	11.8878	11.1061	9.92023	12.3091	10.7492	11.5864	13.6943	12.4683	7.77326	10.9924	8.49286	10.5339	11.1149	11.7447	10.8346	10.6469	13.2398	10.7223	10.9308	9.3717	8.83007	8.46065	10.9429	10.8593	10.2502	10.4354	11.2868	10.479	13.0782	12.7126	12.0164	10.9594	9.7009	12.1618	9.7111	12.7779	12.7282	9.27661	8.19421	10.5835	10.5302
NMNAT1	2.65972	2.42029	2.42519	2.33546	2.25911	2.39759	3.83659	1.97819	3.70618	2.2262	1.73994	2.5491	1.66628	2.47377	1.75389	3.05643	2.09684	2.33447	2.28901	1.49234	2.30907	2.7273	2.44504	2.58119	1.48968	2.63048	2.96662	2.64634	1.48925	3.1253	2.69787	2.0091	1.60191	2.08914	1.7278	2.27695	2.17246	1.17166	1.55528	2.00738	2.57622	1.86327	2.58529	1.51422	2.07571	2.21591	1.94695	2.40428	2.2532
UROD	14.3887	13.528	16.3315	12.3319	14.7457	14.4422	16.1463	13.9232	12.4535	10.4839	10.3778	13.7993	14.3136	14.005	12.2303	13.2212	13.7671	16.2256	13.7021	14.6495	14.6699	12.9265	14.1531	15.2515	12.9979	13.0163	14.3448	15.5031	13.8389	14.6836	15.0636	14.2247	12.7994	11.9827	10.1012	14.8798	11.3609	9.58061	16.2394	12.7702	14.6584	12.2389	14.9471	8.24233	11.9101	14.1519	9.67927	13.8497	13.3657
PYGL	6.509	16.1966	15.1347	12.4022	13.0831	9.18129	14.8497	11.6016	25.5962	16.4698	12.792	12.1044	14.25	20.4516	11.1157	13.882	13.9027	11.8407	12.0783	4.46617	16.7493	3.18153	17.9727	7.08651	6.81284	5.77786	12.7259	14.5675	15.0025	17.8058	18.3797	13.149	7.91842	5.39009	18.189	12.4428	11.9659	9.60135	18.2795	14.6438	10.415	12.6517	19.0949	13.6836	15.3353	11.8487	-3.18603	11.98	15.6346
NAMPT	21.0164	28.0808	18.3582	26.8265	20.3712	20.5297	31.2687	26.8049	22.3502	27.2025	27.2317	17.786	25.1219	26.6378	25.3238	29.4287	27.8369	24.842	21.1744	20.743	28.3805	24.1713	25.6393	19.184	26.8282	15.2184	23.0988	23.8042	34.0594	21.5291	24.6944	27.699	23.2375	22.3187	30.8514	22.7817	21.1601	26.5003	19.4421	22.9057	26.8143	23.2792	23.8054	22.2098	26.8298	18.1918	31.6636	24.5227	16.023
GNPNAT1	8.90524	9.01444	6.23311	6.39815	5.56718	6.99091	8.34121	0.402256	17.7944	6.07696	6.71154	11.4617	7.99181	12.6926	2.41102	8.3113	8.39574	2.46934	8.97427	4.07809	12.703	4.92997	6.19044	10.3075	3.22296	4.34006	7.48286	10.4098	11.6773	12.0735	7.34896	10.9802	-0.746871	4.92208	7.75282	7.08253	11.5755	9.01701	10.0567	7.77881	10.4881	5.30202	9.85284	7.7164	10.943	4.79218	11.7695	5.79434	8.04205
PRODH2	0.628537	-0.0607968	0.237892	1.38904	2.47113	0.480796	0.286305	-0.239628	1.42568	0.345569	0.856546	0.371312	0.566789	1.54132	1.04305	0.0595422	1.16186	-0.187139	0.454992	0.717094	0.481934	0.517598	0.0650811	1.30815	0.410751	0.502311	0.601322	-0.182743	0.709378	0.819299	0.190453	1.23986	0.854388	1.48496	0.332851	1.55786	1.04277	0.415434	0.34692	0.0362789	0.7374	0.509695	0.998835	0.0189539	0.855157	1.20288	-0.161892	-0.148607	1.06517
DGKA	2.14462	2.55063	1.21696	3.99341	1.25095	3.02059	4.69713	2.27049	5.40455	4.38948	5.61724	2.70355	5.44594	3.38672	5.90133	2.68124	2.90238	2.54415	3.43254	4.50667	2.68049	5.94067	2.55315	5.13997	3.09584	3.7231	3.37885	2.99189	1.88568	2.92052	4.08493	2.14908	1.01546	3.18596	5.81969	3.83554	2.60516	3.11486	2.3396	4.55573	1.44286	5.49598	5.17091	5.6773	5.78585	2.95118	2.42685	3.91532	3.22779
UGT2B15	24.4356	0.306011	9.73137	2.71354	4.49111	3.55632	1.17372	1.25464	-0.0223706	-0.800862	-1.73736	0.154919	0.623777	1.72544	-1.4413	1.77456	1.52171	-0.70317	-0.0387112	2.32406	1.80562	0.0671821	1.88461	0.677415	0.637447	7.15619	-0.491338	16.5824	7.21712	9.58193	1.11041	1.21696	-0.410833	6.90578	1.22694	2.31848	2.87057	0.785741	1.70147	-0.0166106	-0.0555247	0.831166	-0.385787	-0.546081	0.111113	2.99993	1.57345	-0.0464081	2.24927
ALDH9A1	20.7162	16.6053	24.1929	16.0821	23.0234	21.0485	21.175	20.882	22.0173	18.1073	21.2067	22.2773	19.8066	13.4506	16.1845	18.8897	19.3766	17.0927	19.8071	19.1208	17.9185	18.7864	17.4114	19.4254	20.2125	22.5096	19.5133	18.6606	18.2075	19.453	18.1847	20.2822	21.5797	20.2343	17.9848	13.6382	22.8116	18.3797	19.6588	19.9241	20.915	17.0522	14.6828	20.5995	20.9663	20.3189	17.2768	18.7041	18.6236
GSTA3	1.31911	0.563154	1.14416	1.659	1.12343	1.33819	2.46044	2.4099	0.281259	2.68416	1.16437	0.858204	1.2866	0.549413	0.591379	1.68452	1.09374	1.06791	0.887653	1.33415	0.406481	1.47637	0.576682	1.11423	1.93439	1.52746	0.572598	1.83201	1.38278	0.70073	0.563782	1.10176	1.08354	1.09745	1.43446	0.339679	2.32973	2.18047	2.90179	1.3877	0.4139	1.0996	0.583574	1.16294	1.47686	1.43484	1.49213	1.9609	0.697199
LPL	18.2965	12.7383	16.1462	6.82606	26.9823	21.2295	-4.24856	24.8255	-8.03374	4.12583	8.16459	17.3015	11.05	4.29055	1.33468	-5.73722	9.17355	25.6697	19.8694	14.8247	-4.18951	9.11782	18.8938	10.9093	14.907	9.39154	10.7877	15.7595	2.42875	15.7398	9.2969	28.7864	12.1941	22.1176	8.40298	13.0648	21.0204	5.52221	18.2862	15.3518	18.0956	7.57925	5.98595	-2.37299	4.74231	25.5084	6.83347	11.7403	23.0094
MGST1	33.6044	34.7762	34.5992	32.1436	37.6772	30.774	33.0905	29.7521	25.3167	28.4999	31.4872	35.4871	23.074	34.124	33.5365	36.0828	29.1242	28.9371	35.1795	22.7276	35.1999	30.3033	29.7335	32.5625	31.0152	31.6737	29.2664	31.9278	34.626	32.4459	25.2115	37.486	35.2837	32.8132	33.4457	34.3801	38.5268	36.1529	27.9972	28.3663	34.7925	28.9294	23.2456	24.1364	31.6308	28.9356	28.3113	30.5587	27.9548
DUT	6.20795	6.23589	6.6411	7.37987	7.04254	6.2717	8.63703	7.23878	7.95118	6.90976	8.95727	7.18397	8.47287	7.6224	8.97074	7.31749	7.39818	7.13093	5.74232	9.02946	3.71424	8.34312	5.342	9.29647	6.66835	7.74102	7.10686	7.21107	7.73825	6.14032	8.09798	5.09518	5.47639	6.488	10.2972	6.46979	4.24666	8.67561	4.74757	7.22276	5.88663	5.99052	6.03535	11.0798	10.6256	6.20755	6.54095	7.61245	6.44554
ALOX12B	0.618912	0.691331	0.598231	0.869729	0.948033	0.644672	1.77453	0.752751	2.37311	2.82099	1.80219	0.970648	1.47696	0.711246	0.902023	0.939939	0.908219	0.678759	0.876237	0.806344	0.810792	0.854567	0.713199	1.0643	0.840869	0.728917	0.728904	1.11928	1.13502	0.8961	0.739015	1.14636	0.723579	0.724982	0.887552	0.868342	1.18608	0.837442	0.879196	1.44488	0.780387	1.41253	0.744186	1.88677	2.32184	0.542411	0.732447	0.567237	0.912529
PNMT	0.0738611	1.28012	1.60283	0.980936	2.13963	1.05184	1.38529	1.58215	0.824648	1.74844	0.753828	1.91671	0.907626	3.71423	0.980335	1.52063	0.792727	1.38836	-0.050223	1.49525	1.04798	1.16865	2.59424	1.46977	1.57759	0.43215	1.63873	0.85267	2.53597	0.311899	0.611982	1.42738	0.796496	1.67282	0.826825	2.22379	0.848823	1.1057	2.29567	1.27474	1.14429	0.135436	1.42809	1.40663	2.84619	1.94045	0.840186	0.521671	0.413812
GUK1	30.3377	30.6184	31.1246	29.1512	31.9383	29.5484	27.9411	29.494	35.9206	27.7877	30.6181	30.1967	28.9443	32.122	27.7853	29.6441	30.6213	29.2558	29.318	30.216	30.411	28.5762	31.9518	28.1556	28.0704	27.1392	31.0626	30.4816	27.3388	30.9977	30.5931	30.4562	28.6791	24.6424	28.2752	31.26	27.5897	27.5379	30.4148	29.265	28.8367	26.299	29.6174	31.9571	27.3348	28.6223	27.7459	29.3067	28.6648
SDS	1.43776	5.58405	-0.725045	0.928185	2.49051	0.026465	-0.124725	-1.38729	1.40493	1.54893	-0.596635	1.62943	3.81897	0.739687	7.28625	3.92628	-0.369274	-0.922598	-0.43035	5.68579	1.84859	5.40542	2.29923	4.18253	9.94454	-3.63898	8.88692	5.26005	3.08051	7.20016	4.63979	2.51537	0.868656	0.113183	1.64053	5.48814	-0.544912	5.49183	4.59021	7.2776	0.234932	3.22712	0.456322	1.60959	5.87031	2.48214	0.230609	5.76061	4.44231
ECI1	7.73696	5.63019	12.8477	7.79586	7.47999	6.53331	16.6433	8.81071	10.4054	7.45319	8.93907	9.83008	8.6225	10.0389	10.3296	9.31249	7.27435	7.96794	8.60963	3.98005	6.401	9.62656	7.16095	7.13332	12.1484	7.67426	7.76554	9.64174	5.95377	14.1441	7.92261	9.64491	9.65616	8.06835	5.5685	9.45645	10.2016	12.336	12.7481	9.32059	6.31828	7.39969	8.88386	8.99927	12.0466	4.6827	2.87568	7.88503	11.349
ALAS2	0.779146	0.936424	0.686966	1.93525	1.6307	1.17984	0.477012	0.68278	0.741645	1.2154	0.663545	1.14215	1.11416	0.815203	1.34537	1.19317	1.28821	0.531987	0.836645	0.579337	1.58014	1.02853	1.99237	0.724513	1.47116	0.142516	1.37041	0.591004	1.75035	0.745011	1.41576	0.702469	0.841056	0.75952	1.84601	1.48902	1.41	1.59276	1.28384	0.631292	0.673794	0.858613	1.36071	0.985541	0.705484	0.619607	0.941494	0.944388	1.1816
SULT2B1	2.50748	3.55988	1.1952	3.8521	2.05437	3.15789	8.43793	6.53296	17.7581	14.0552	3.71599	0.95072	8.32929	6.93965	-0.539233	-0.547268	0.571007	6.09413	8.77551	3.79151	3.34762	8.60629	2.67712	2.57573	9.70306	2.266	4.97367	1.06341	8.53683	5.18493	2.66973	1.86187	0.492372	3.57548	6.99189	6.18457	3.26316	0.264865	-0.411859	6.61942	8.5864	9.15252	-1.32824	9.19675	11.1685	5.33033	4.15566	6.22203	2.77661
PLCG1	7.06728	8.07321	7.37886	7.40424	4.24241	7.33642	5.79272	6.15519	7.2599	7.27988	6.36747	4.25387	7.38158	5.18596	6.05485	5.47331	6.55914	6.67743	7.00641	6.85865	3.69693	5.18019	6.8175	7.159	4.32939	5.39629	7.177	5.06566	5.31491	6.63343	6.85548	3.2775	5.85702	5.97786	4.92539	6.00082	4.68731	4.86579	9.073	6.2788	5.84412	3.75002	5.50228	3.3715	5.05171	7.62769	6.38003	6.86846	7.99999
GMDS	9.09368	5.12924	6.57573	7.61066	2.83639	1.47002	5.57565	1.3616	2.76684	1.53804	0.16107	5.14656	4.85938	4.0096	0.575113	3.79786	4.46527	-0.680754	3.41154	8.18183	3.92505	3.314	1.26728	7.00967	9.80576	4.01807	5.22797	7.54159	5.98342	8.48059	4.79121	6.33347	2.41994	-0.429847	3.69214	3.0695	7.51902	6.00331	10.935	2.27556	7.42307	3.69928	6.42197	1.69126	2.60865	6.84751	7.86058	4.63447	4.2191
INPP5A	6.01217	6.15288	3.83687	4.81641	7.16595	6.11342	6.75749	7.5386	7.27707	7.66495	4.49377	7.74022	4.44784	6.66692	7.86064	4.87156	2.93458	6.37069	6.73305	6.87002	1.76813	6.27478	5.9292	5.30109	5.8467	5.5806	4.94021	7.19035	3.8676	7.48662	5.44326	7.01028	5.2913	5.6775	4.19752	5.32136	6.34958	3.30022	4.10725	5.34632	4.33656	5.59925	5.42574	6.6548	5.54745	6.26113	2.98581	5.22304	5.30016
ACSL3	11.4607	9.74698	9.88282	11.9246	12.9745	13.3807	11.3654	12.328	7.84394	11.3278	14.4909	9.44754	8.64026	12.2391	12.7069	14.4175	9.5793	11.7951	13.4103	10.4488	9.98689	11.9162	10.8873	8.94252	13.8791	14.483	11.5661	9.20131	11.9377	13.6836	8.96735	13.3116	12.5637	10.5063	10.0133	11.378	10.2085	12.4941	10.5122	9.6997	10.9386	8.50337	12.1602	10.1882	9.48493	12.8503	14.8044	10.4828	15.8385
GANC	2.89833	3.43822	2.20222	2.20363	3.91961	3.35293	2.30379	4.55546	6.27841	1.17662	2.11128	5.4487	1.42435	0.562821	0.941657	2.72638	0.596286	3.45653	4.68022	2.51183	1.80691	2.2936	3.3657	2.69803	2.52026	3.20766	3.04138	1.62756	1.54687	4.43352	3.46921	5.77777	5.32398	5.78834	3.11185	3.0743	2.97202	1.31689	0.147934	2.85062	5.41069	2.74016	2.92674	3.58675	1.7343	3.4223	2.13423	2.93298	2.16051
TAZ	8.63016	2.50909	6.82955	3.71509	6.6897	6.38333	2.02143	4.98574	6.91472	3.00708	5.16797	1.31109	5.10865	10.6868	5.28568	5.39374	6.48558	5.52423	4.63771	4.35635	8.01723	4.81619	4.34261	6.82503	6.27791	5.67213	4.04778	4.60635	5.28458	4.19478	5.39068	4.57529	6.3062	8.09486	6.26765	2.26028	5.72789	4.63993	6.11072	4.66596	5.09247	6.76909	4.97927	5.94664	5.0121	5.63562	7.23983	5.37988	3.56031
ACSS3	2.54291	1.68896	2.02445	1.57135	0.280769	1.76807	1.59747	3.49539	-0.11418	1.25681	0.575385	1.05785	1.5038	0.839027	1.10709	0.260586	1.73943	3.12109	2.23149	1.32012	0.936812	1.03976	2.20927	1.06756	1.23616	1.86562	2.28967	1.91294	2.42151	2.31906	2.30149	1.8176	0.563874	1.24452	0.649391	2.5312	4.34715	1.9323	2.65734	1.93403	1.3297	0.788847	1.39678	-0.490348	-0.0277497	2.49124	0.258378	1.88665	1.85392
CYP1A2	0.668751	1.11189	1.13826	1.4824	0.830828	0.981659	0.754156	2.66113	1.73287	1.3614	1.07493	1.03028	0.929765	1.384	0.695797	0.912057	1.22011	1.44335	0.275163	0.689523	1.60525	1.18037	0.756903	0.944335	0.650975	0.921317	0.680773	0.289567	2.34924	0.492799	0.712034	1.27095	1.22738	1.1099	0.898384	1.09307	1.43219	0.739985	0.713016	0.310537	1.06868	1.13157	1.11239	0.7985	0.682552	1.73982	1.72156	1.31795	0.222615
CBR3	2.10471	0.080936	12.0045	10.1326	13.7502	2.90024	24.3013	2.33104	4.94055	4.22732	17.8397	11.3966	12.7061	6.31175	24.3987	19.3396	3.58375	3.63628	17.215	7.33627	10.2755	10.466	4.23627	9.88275	5.71569	5.90335	7.596	6.05094	8.9296	5.22555	8.38912	22.5437	5.02419	5.41951	14.8832	6.95501	18.6085	7.00658	-0.866983	7.11389	9.92007	3.39909	4.03718	12.6652	18.496	0.79262	0.830296	4.0847	2.21948
ADCY4	1.91316	2.18688	2.2628	2.50948	1.64628	2.62379	1.24113	4.64369	1.11964	1.0359	0.772139	1.78191	2.75902	1.57679	0.938301	1.42502	2.55099	5.5953	2.88824	1.47338	2.281	1.28302	2.09086	1.84425	3.42041	1.82917	2.05144	1.60666	2.08679	3.39303	2.37395	2.32784	2.01136	1.74444	1.34281	1.80658	2.28946	1.03761	1.79636	1.40446	1.84875	0.667072	1.74047	1.18524	1.72055	3.38229	1.2658	2.35043	1.49921
KHK	0.693446	2.30652	1.71668	1.70823	2.5732	0.161186	1.98489	1.55814	1.55998	0.633218	1.3337	1.00909	2.73413	1.83052	2.29691	2.79167	1.99742	1.32194	1.15827	2.42119	1.92661	1.38276	2.01716	1.51465	1.68125	2.04799	1.17249	1.542	2.40159	1.28923	1.4165	2.19542	1.53249	1.10452	0.242349	1.80433	2.82775	2.63764	2.2127	3.51693	1.72727	1.5963	1.36296	1.30844	3.28545	1.47124	2.63795	1.83035	2.60632
NADSYN1	2.83487	3.37317	4.25521	3.54289	3.37039	3.32681	5.51304	3.52518	4.71801	3.35614	3.37167	2.82223	3.78711	4.23623	3.0774	2.02007	3.61693	4.25392	3.57337	3.27537	4.28912	3.90183	3.25926	2.90259	3.76708	3.30963	3.21442	4.06784	3.72951	4.02777	3.76131	4.16103	3.11856	3.80936	3.59083	3.00314	2.80077	3.61352	2.2866	3.86287	4.58028	4.4004	4.21962	4.13962	4.30109	3.97947	4.53895	4.12669	2.64451
AFMID	3.2545	8.56608	8.04385	5.40952	9.40765	4.06215	5.57649	5.0963	7.50481	4.9369	7.14686	3.98672	4.74733	7.77039	6.31272	10.4043	7.44559	7.24169	6.21779	6.62955	3.35745	7.94159	8.21112	7.17144	9.94475	3.48047	2.16961	4.92401	6.6636	5.76095	2.70282	6.64935	4.0781	3.39913	6.19011	6.50911	3.79413	5.49594	9.48662	4.63897	9.5069	5.62316	5.7753	6.91532	5.23764	7.94102	4.13667	5.40763	5.85412
BAAT	8.25015	3.48025	8.11438	4.11197	3.82744	0.29409	1.10986	1.84219	2.31015	0.578779	0.731447	2.33505	3.44641	0.57963	1.79943	1.55646	2.26934	-2.03857	3.94059	2.28657	2.43084	2.69634	-0.816972	2.89078	0.348055	1.64997	13.3065	14.3068	4.1714	12.3753	3.40858	4.01983	3.43056	2.8675	-0.131006	0.3642	1.82987	3.53723	1.4216	-0.92046	0.60059	1.2111	3.30445	-0.997008	2.17632	-3.14255	0.110503	7.65274	3.30051
G6PC2	0.89932	0.846008	0.885213	0.939254	0.909284	0.798357	0.834987	0.86526	0.912906	0.896556	0.886802	0.866933	0.878316	0.902739	0.884571	0.850477	0.859181	0.888554	0.857992	0.901567	0.863003	0.949178	0.855717	0.854823	0.917007	1.01616	0.816705	0.835348	0.931661	0.820202	0.840067	0.908993	0.943292	0.89799	0.92182	0.854888	0.936678	0.900308	0.81506	0.865634	0.866513	0.880859	0.876009	0.919843	0.890348	0.871925	0.9043	0.832815	0.871335
CDS1	11.8487	11.7745	9.92251	5.83915	11.0581	11.298	11.5354	11.5598	8.34862	11.5951	6.67719	12.4187	7.16191	12.9012	6.73405	9.50633	7.40569	7.00658	10.8059	6.57884	9.20292	9.74217	9.22079	9.41582	11.6838	13.6242	7.66085	10.6844	11.4212	10.0074	5.57879	10.6477	13.2595	13.0636	4.6185	9.17584	11.5728	9.53279	5.43586	9.30109	11.3755	10.4406	6.23673	15.8014	12.7937	9.84793	11.9874	9.05324	5.56884
PDE2A	1.86326	2.27957	1.16622	2.48691	1.8868	2.4302	1.53033	3.62581	2.06907	2.12749	1.50227	1.3405	1.30485	1.54103	0.663146	1.23332	1.57399	4.12442	3.82226	2.03903	1.45656	1.52677	2.5447	1.20233	2.26109	2.96448	2.17827	2.4498	1.28434	2.17555	1.89246	1.5668	1.19582	1.54809	0.835604	2.07819	1.0583	1.33608	0.870781	1.33031	1.93109	1.21692	1.49433	1.26807	0.886459	2.95438	0.932712	3.12831	1.98252
CHST12	3.59299	2.78689	3.45706	3.09275	3.528	2.70697	2.60474	3.10825	1.69675	3.0771	2.33373	2.10545	2.23544	2.37168	1.38312	2.53473	3.30597	3.42845	3.27078	2.20779	1.76266	2.22267	2.75889	2.45195	2.33301	2.72069	3.55995	2.4294	1.91847	2.38265	3.14364	2.66907	2.35349	3.39036	3.22552	2.99631	2.42524	1.67968	2.80048	1.59292	1.83053	2.03186	2.49245	2.08519	2.17374	3.53923	4.01258	2.50093	4.73091
PCCA	3.43796	2.67618	3.85488	4.03322	3.57846	2.98658	2.9409	2.71177	0.0773603	0.611736	1.21115	3.41454	1.55774	1.54672	0.850842	1.03664	1.86666	3.92817	3.35935	2.2205	4.92538	1.55911	0.984135	2.72352	2.79971	3.24489	2.57977	2.17252	2.37431	2.77862	3.21901	4.64424	2.50581	3.18732	1.58338	2.45985	4.0045	2.54493	1.31613	1.8286	4.46106	1.19749	2.28429	1.89611	3.04488	2.74368	0.952223	2.38243	7.66722
FTCD	0.605757	0.794075	1.24053	1.22926	2.41877	0.304499	1.33457	-0.0962367	1.39134	1.3452	0.831384	0.672573	1.26836	0.994659	1.10152	0.655033	0.791863	0.722468	0.553411	0.901959	1.17483	1.76575	0.835767	1.21374	1.06125	0.372655	1.16744	0.340697	1.42979	0.421282	0.933287	1.12223	0.887019	0.6264	0.865121	1.2271	0.504601	1.07047	1.31488	0.963191	0.666384	1.24973	1.00218	1.25894	1.50457	0.732724	1.13953	0.683705	1.51976
DDC	-0.974803	-3.4091	2.41986	-3.49507	5.90684	-2.86249	-3.15699	2.50654	-4.78597	-3.88515	-2.73218	-0.125064	-4.18715	-6.14865	-4.73915	-2.24151	-4.54724	-1.4847	-1.69417	-2.885	-5.3935	-3.73571	-6.13601	-2.53113	2.60149	-4.15698	-5.66975	0.423977	1.85795	5.43015	-5.83702	13.0364	-4.50271	-5.37417	2.24739	-5.90039	13.2885	-2.81172	16.0136	-4.4503	-4.76854	-4.91356	-5.05504	-4.74432	-6.61561	-0.760456	5.32566	-4.78817	-5.42213
GPI	19.3475	21.2395	23.8592	30.2206	28.394	19.8537	29.2943	19.8274	29.5521	28.2346	31.5918	24.3824	31.1843	25.889	33.1406	27.4237	23.5675	20.9548	25.9188	30.8599	28.7661	27.0005	28.1769	28.4804	23.3814	21.7813	26.3265	29.8306	27.1282	26.9188	25.3435	23.9303	22.8879	20.1678	31.302	24.1145	22.059	31.3481	24.6999	28.0834	26.2531	34.0312	28.6663	26.0173	28.4045	25.2904	26.6017	22.7954	27.0707
ALDOC	0.562089	1.38819	7.93344	7.56917	-0.217261	3.72259	17.7237	2.95093	15.914	17.5969	15.4817	9.11986	15.7321	12.6439	14.0194	11.421	2.84389	2.14761	7.44952	6.8217	8.49226	10.834	10.6391	10.2051	8.44727	4.66996	6.52957	5.77507	5.90247	4.99366	7.603	-0.0505938	1.9109	-0.310444	11.275	10.0635	1.80228	12.8772	8.5977	9.86558	7.00953	15.927	11.4571	9.85109	3.85176	5.85233	5.76203	6.08389	5.88144
DNMT3B	2.35538	0.457094	0.810585	2.05592	-1.80089	2.22036	8.13498	-0.788761	5.14221	4.53126	1.77695	-0.279439	2.20285	2.56239	0.370224	3.23277	2.34291	0.0270685	-1.0294	1.85105	-0.74319	-1.48013	2.15886	2.44915	0.34063	0.0116542	0.572509	0.12911	1.08006	-1.37829	0.45015	-1.00369	1.37401	-2.047	0.792143	0.187789	0.435038	1.7234	2.51112	1.3503	-1.69282	0.815657	-1.00071	2.14971	4.47359	1.39385	2.09521	0.216424	4.72113
AKR1B1	16.0381	11.5057	10.0238	22.1271	14.7533	17.4925	16.2024	18.9091	10.9396	12.3842	15.2048	15.8645	21.6551	18.1997	22.4746	20.0499	14.8611	21.4265	21.0105	15.44	18.4492	15.0361	20.0092	14.4796	19.155	16.4684	22.2675	20.9699	24.9435	19.5353	19.9134	19.5079	11.4944	11.411	19.4612	22.6364	33.2708	24.8977	19.7796	23.0525	17.8574	14.0355	17.0346	15.718	20.3148	17.5788	10.9297	20.7092	18.071
POLR3A	2.34494	2.96836	2.64953	2.12234	3.54164	2.69866	2.42112	2.66852	3.43886	3.10544	2.39687	2.74096	2.63981	3.78197	1.80755	4.51462	3.23779	3.31924	3.30095	2.14738	2.70341	1.96203	3.07425	1.66473	2.92388	3.83836	2.25301	1.95267	2.3797	3.93362	2.27452	2.72483	2.32411	3.43615	3.32723	2.60496	3.37183	1.50868	4.31238	1.0934	2.86751	1.37588	3.23807	2.7375	4.0546	2.67212	1.77056	2.01339	2.8386
CYP26A1	0.488318	0.494803	0.611453	1.11544	0.909829	0.616051	1.8611	0.57836	0.708371	2.76136	2.7732	0.542488	0.839915	0.781491	2.60147	0.768611	0.566458	0.796611	0.68724	0.638484	0.882268	1.22595	1.02133	1.46879	1.05766	0.470794	0.646602	0.787404	0.592231	0.602102	0.657969	0.665875	0.380797	0.441315	2.4984	0.650277	0.788304	2.35175	0.711334	3.30471	0.617009	1.93643	0.705026	2.85819	3.31709	0.63687	0.509649	0.709265	0.803982
DMGDH	2.07159	0.762589	3.07857	0.666762	1.88623	1.25379	0.474171	0.893003	0.859666	1.51699	0.461155	1.16662	0.491357	1.37699	0.0368612	0.879778	2.1864	0.760553	0.899904	0.92445	1.31972	1.45844	1.1115	1.04348	0.815179	0.988902	0.684937	0.621838	0.820175	0.660258	1.01509	1.09286	5.68127	-0.0436131	0.558974	1.8763	2.8569	1.09383	1.90552	0.780773	1.14888	1.71628	1.6886	0.751102	1.47785	1.44462	1.35224	0.849593	2.01043
GNE	4.72351	2.88349	3.93052	5.33105	4.98235	1.58485	4.01324	5.36291	2.45724	3.20752	3.42107	3.65294	3.92155	4.26291	3.11355	5.53424	4.23459	3.82118	5.47371	3.2926	2.67829	8.41484	2.86686	0.625742	10.9725	6.25284	5.91389	3.12362	0.147817	1.5145	4.59539	1.07348	4.65311	2.62535	6.91929	4.10386	3.72617	7.86266	3.27179	3.0996	2.78278	4.99576	6.03056	0.494594	3.41499	6.15305	3.82443	2.99842	3.91976
SHMT1	3.06692	2.73322	5.03483	5.90492	8.74837	4.81266	6.04492	1.8706	4.07293	4.18051	4.18672	2.11032	6.06886	6.74389	4.95327	5.65245	5.62371	4.21423	1.9535	3.84028	2.13766	4.32233	1.28459	5.50622	1.76313	1.03211	2.51815	3.83907	4.45115	2.21917	4.25679	5.04552	3.73573	4.73732	3.75628	3.50177	4.2909	5.66158	4.58159	4.14215	1.73029	3.03135	5.41524	3.1031	7.0532	4.29584	3.49631	4.10009	4.47005
PGM2	5.0136	5.17654	6.18798	6.18247	-4.03375	2.36441	11.7986	4.58785	11.5383	12.2489	7.20795	6.91273	8.11183	10.2901	9.89014	4.82882	5.72244	4.33026	3.10903	10.9437	6.6529	10.5585	4.48974	10.2042	6.01022	3.83054	5.45629	5.66571	3.46542	4.43213	9.35667	1.42176	2.69519	2.33816	10.2093	7.11072	5.44721	7.92336	1.96228	8.74656	4.54186	9.55416	6.94589	10.0735	8.56732	6.79493	2.67627	5.25294	3.87761
KDSR	4.2313	5.69787	6.56755	5.2319	4.03306	5.34588	4.43512	7.30183	8.90902	8.18101	7.4982	7.63269	5.62096	4.2374	5.69671	6.56821	5.4735	6.69813	5.79998	5.62695	5.37765	6.92014	4.8423	7.71315	4.60385	6.60237	6.62992	6.07023	4.19447	6.84847	5.80128	4.17687	6.1508	6.41202	6.031	5.2642	6.63517	5.10557	7.21163	5.19901	6.71801	8.12411	7.32979	5.81736	3.78988	6.18395	2.84504	5.3406	4.50754
UGT2B17	0.510981	0.594921	0.497309	2.45253	1.16794	0.997403	1.63759	0.897553	0.281558	0.653157	0.925528	0.827227	1.1909	0.492136	0.387668	1.27432	1.54159	0.547753	0.355187	1.42318	1.27002	1.29059	0.63188	0.530386	0.721843	0.656128	0.94126	1.42534	1.08196	2.85547	1.77761	0.871638	0.587234	0.502628	0.749064	0.869892	1.40377	0.621967	1.03356	0.702564	0.414073	1.22516	0.50242	1.90622	0.900193	0.676448	1.1511	0.503576	1.23467
MPST	11.1785	8.50515	7.31494	7.77231	8.39743	7.25723	11.7043	9.7767	6.83339	8.49797	10.9382	12.8282	10.318	9.63953	5.48514	8.05281	7.08448	8.46729	8.16086	7.25722	8.92351	8.72662	5.52111	9.04307	8.99423	11.6836	9.25735	8.1613	8.50387	8.0124	6.79439	9.17199	11.0199	9.80897	7.2041	6.66957	9.90866	8.66555	8.32229	8.37371	8.53311	8.80329	6.46584	14.6379	12.0727	7.79539	4.12047	6.56031	9.45401
CES5A	0.793416	0.746753	0.893359	0.752677	0.792926	0.66821	0.699429	0.727545	0.772615	0.823417	0.753478	0.839951	0.735894	0.881211	0.846756	0.810674	0.706694	0.810366	0.793836	0.768251	0.809079	0.746509	0.775118	0.808063	0.797281	0.795031	0.750709	0.761338	0.778372	0.718353	0.804913	0.748442	0.777713	0.769804	0.81467	0.743526	0.808264	0.765843	0.704108	0.830805	0.761521	0.740112	0.819019	0.906409	0.718602	0.79514	0.778535	0.726511	0.802636
FADS2	2.74557	6.1209	8.68548	5.87371	6.86307	1.89419	8.56157	4.82324	9.65144	5.42908	6.33979	5.13025	7.5027	5.6063	6.90988	6.6034	4.38136	5.27483	5.06195	4.57499	4.40225	2.87514	3.2813	3.09761	7.99892	3.85467	6.41997	6.70112	11.06	5.83289	7.55514	7.13693	3.96718	4.22046	6.09182	6.04417	4.78535	7.66237	9.08473	7.51185	4.50579	6.37638	4.96437	7.52263	5.71723	5.12599	5.73184	4.62964	6.34333
PNPLA4	6.563	4.20095	4.36295	4.07382	5.13029	7.41095	6.29607	5.92096	6.27136	6.06485	4.5208	6.62746	5.05806	4.64569	4.93444	4.64565	3.18405	3.53827	3.50614	4.05228	2.74439	4.32303	4.43252	4.96228	3.34484	6.6353	3.67638	4.18397	3.08242	4.67874	3.59912	5.90994	3.33388	2.72275	3.97226	4.70297	4.53252	4.96309	6.86869	4.58784	6.90219	2.86612	4.36493	5.62407	5.1508	5.16737	3.90451	7.44917	3.68951
TYRP1	3.39932	1.01396	2.9249	1.34679	1.36482	3.1284	1.47842	2.55918	0.759698	2.56238	0.880608	3.08929	1.57287	0.91585	3.17991	1.50617	1.02377	1.40495	2.20526	0.708873	0.70541	0.590289	0.729416	1.89739	0.922369	3.65528	1.68925	2.90547	1.11653	3.89766	1.6961	1.82022	2.45543	3.44082	1.01019	0.483648	1.59508	2.92041	0.517975	1.392	0.961821	2.39341	2.05584	1.08813	0.77551	1.47856	0.680335	2.57933	0.512189
ACP5	38.1225	38.0022	37.7685	33.2517	30.9904	42.9375	29.0284	44.455	35.6432	31.0508	33.1197	41.2147	39.036	30.5179	36.3937	37.2207	35.1595	46.7841	40.6191	36.9378	32.045	33.7613	46.5431	37.3927	43.2708	36.8377	44.3431	36.6623	31.3421	42.8977	38.2362	32.0533	34.5844	38.5096	32.7087	44.5538	37.3161	36.8115	37.6285	42.3045	41.342	33.8327	32.5199	27.6802	31.4184	44.0782	34.516	40.4525	38.8589
IMPDH2	32.6611	32.4204	34.0371	33.1719	39.6522	32.2208	34.9394	31.8396	33.2941	34.8507	32.4161	41.3465	33.948	37.5612	30.2241	32.665	36.8466	32.6805	36.2454	32.7564	32.916	31.9876	35.5552	31.4999	33.3962	34.4583	33.2389	32.3727	29.1424	34.2432	32.3854	39.5413	37.6144	33.979	34.3086	33.3733	32.2524	36.3037	37.7141	31.9284	35.4897	35.7946	32.9672	31.2828	31.8912	29.4044	31.1335	33.0694	35.5166
SHMT2	8.35134	9.1156	12.433	15.2219	11.1662	9.36779	13.4362	7.53956	15.2993	16.4339	19.0157	14.5557	19.5572	16.0693	19.8467	15.7315	13.8107	7.4059	7.16085	17.1648	19.727	13.9701	13.4684	17.2432	12.5016	8.88964	15.4647	12.994	17.1696	11.6389	16.3446	14.8789	10.9881	10.6086	23.5615	16.5183	17.5138	16.0547	16.4164	17.8311	11.4561	23.0476	20.5791	18.039	20.7516	11.5537	12.4175	11.0938	12.027
ACAT2	4.6553	4.798	5.92298	3.90905	2.64556	2.17736	9.72384	5.22627	11.2414	8.29463	8.13653	5.42232	8.24816	5.3358	7.99408	4.75722	3.69335	4.818	5.51715	8.76	2.40623	6.83698	3.36653	6.46153	6.1063	2.84207	3.62321	2.11572	2.20014	1.94211	6.36098	-0.0297434	5.09442	0.919693	6.30027	3.65093	3.95215	6.12115	7.7295	6.50444	2.59012	6.40106	3.65802	7.91423	7.08392	1.96248	-0.943191	4.45857	5.17193
IPMK	2.23964	1.94499	2.59288	2.77222	1.52175	2.21511	8.43314	2.0051	5.62094	2.38868	3.8033	4.45453	1.21493	6.48439	4.5812	4.07418	2.21622	1.62776	3.13566	3.96247	3.00351	3.02005	3.02235	1.52235	4.04183	0.989203	2.71106	2.18315	2.08827	3.22817	2.29764	2.62976	1.41663	0.207027	3.21007	2.77125	4.21034	4.2991	3.06874	3.05565	2.24014	5.11341	2.2744	2.79767	6.731	2.52166	4.11805	1.59037	3.31797
LIPF	0.702413	0.821078	0.845233	0.747429	0.967265	0.826332	0.806656	0.743655	0.823018	0.78619	0.807764	0.824534	0.777723	0.887535	0.799983	0.714096	0.957757	0.765411	0.751034	0.804379	0.809314	0.729621	0.743262	0.80149	0.771965	0.78613	0.76976	0.735947	0.84506	0.783618	0.832885	0.825704	0.797637	0.910315	0.783207	0.783005	0.763607	0.877415	0.809857	0.817077	0.881559	0.676911	0.724283	0.788999	0.87559	0.867728	0.849005	0.811168	0.73279
ASPA	1.22613	1.45543	1.20046	1.42859	1.21346	1.49227	0.73821	2.15666	0.79788	0.827625	0.553541	1.06794	0.712054	1.03585	0.83964	0.995493	1.0636	2.13455	1.62676	1.0679	0.985359	1.01591	1.21502	0.804935	1.19714	1.45948	1.14031	1.50892	1.03869	1.25027	1.15696	1.26358	1.06124	1.37339	0.649786	1.18143	1.04228	0.762737	1.0863	1.07367	0.968077	0.667842	1.40586	0.515578	0.685176	1.46878	0.957405	1.72159	1.13317
POLE4	11.2915	13.8036	13.6825	9.99637	9.52766	8.59527	13.389	11.3101	11.8162	11.2766	12.551	11.7139	11.927	11.8327	15.0894	17.2363	12.8172	11.9316	12.0386	13.314	12.3977	11.4974	12.3138	14.4432	10.3779	9.01453	10.3024	10.9179	15.1878	11.2179	11.4403	10.3736	11.9512	8.35999	12.8679	10.6415	11.1503	11.6423	14.1538	13.072	11.1202	7.81437	8.50636	13.6556	11.2656	9.41528	6.79976	11.8367	8.5296
TDO2	1.72179	1.89116	2.29643	3.24862	1.86303	0.580362	0.226623	-0.73546	2.04288	2.79289	2.95876	1.11954	2.93084	2.94702	3.08934	3.29577	3.15242	-0.621851	1.97836	2.4202	1.74225	3.05145	2.78129	1.72843	1.28727	1.3011	2.96988	2.16439	2.21584	1.7627	4.38174	1.84093	1.12577	0.0752007	3.18956	3.55645	3.2957	2.12202	2.53651	1.98198	-0.701238	2.17771	4.06102	0.977135	1.98481	0.335305	2.10615	2.93759	2.1739
PKM	97.0153	96.1976	94.8465	102.509	96.0093	97.1634	98.8833	94.4814	101.035	97.9316	102.695	94.1093	98.6	102.854	98.4456	101.241	101.99	98.0659	101.954	101.037	104.736	98.9736	102.456	99.4826	101.282	98.9093	98.8833	102.503	105.835	100.675	104.582	100.023	97.3185	97.1086	108.829	96.0027	95.9989	98.1919	101.075	101.302	103.623	101.452	105.494	105.182	96.7188	100.808	98.6269	101.932	98.6365
GPX4	80.6967	84.2442	80.2765	80.001	83.7174	82.4542	79.9371	81.8886	74.9109	79.7984	83.2422	83.2489	83.9968	78.6809	82.9598	84.6166	81.45	82.0398	81.6473	80.7393	84.4352	80.7535	89.4739	82.0912	82.6814	81.9136	81.9688	81.182	82.9274	81.7122	79.6224	80.9776	84.7291	83.6831	78.9939	82.7661	82.0308	81.7776	80.795	80.6213	84.5599	79.1011	79.4635	77.8885	81.7275	81.2756	80.1619	83.1936	81.3504
PLA2G2D	0.874607	0.548354	3.05441	5.49284	3.80409	1.43768	-0.0262577	-0.216792	0.85269	0.922851	0.587652	5.6277	8.97944	4.67831	2.50698	11.9514	3.58789	0.812773	2.74256	7.98387	2.93071	8.63226	3.51248	0.77955	1.22691	8.55742	14.0913	3.28293	4.47697	7.28946	0.716614	2.43607	2.32382	2.16303	3.75372	16.3413	4.52628	6.42753	9.96383	2.96562	0.371368	3.40636	1.96587	-3.06023	-0.421355	-0.200613	5.13137	7.92372	9.6485
IDO2	1.04398	0.653084	1.03321	1.89105	0.257855	1.32978	0.515746	0.615856	0.935967	0.56043	0.520404	0.730804	0.778342	0.967024	0.856573	0.91472	0.978855	0.323069	0.723567	0.526117	0.809063	0.979455	0.868212	0.611877	0.703678	1.048	0.868707	0.783984	0.819811	0.975937	1.06849	0.660343	0.577092	0.894782	0.674526	0.798131	1.2647	2.46502	2.09145	0.953857	0.589408	0.366806	0.777109	0.537933	0.782005	0.714931	1.01123	0.919442	0.993144
FBP2	0.937657	0.729412	1.09539	1.57666	2.01411	0.333008	0.641703	0.57604	1.33688	1.11259	0.963329	0.652832	1.11226	1.29473	0.999643	1.14128	1.77921	0.413498	0.439847	0.692921	1.03092	0.900087	1.06783	0.969256	1.16824	0.822392	0.672824	0.955574	1.21433	0.966639	1.13478	1.37204	0.920629	0.990516	0.725316	1.40308	0.681769	0.780279	0.805735	0.907441	0.663957	1.10592	0.758637	0.898874	0.525843	0.962957	0.90879	0.849672	1.00809
INPP5K	5.85258	7.31414	8.14039	6.21314	7.48336	6.1718	5.84151	9.31747	3.95525	4.73923	6.31944	8.47401	5.58239	5.68902	5.39106	7.08553	5.5993	9.50884	7.80175	5.65224	7.26532	4.6302	6.50393	8.39698	6.70372	6.33539	6.62264	7.05846	8.47805	6.52065	6.40173	8.61677	8.24506	8.4063	4.43285	7.14887	8.05629	8.11005	6.45803	5.15236	5.67778	6.32701	6.74286	6.75699	8.88748	8.77097	4.67516	5.08358	5.55852
CA5B	1.69438	1.17659	1.94849	1.48963	1.54216	1.5203	1.27231	1.45559	1.65759	1.80515	1.8633	1.44887	1.15447	1.34066	1.77178	1.37172	1.3065	0.851717	1.58873	1.67749	1.07083	1.86794	1.42447	1.58188	1.93469	1.66887	1.32972	1.21894	1.3877	1.16512	1.64969	1.74878	1.85815	1.5249	1.57877	1.26363	1.61152	1.14853	1.41772	1.42563	1.52168	0.815972	1.57239	1.29551	2.22504	1.65457	1.48342	1.46411	1.24908
PC	4.84107	5.54637	6.23418	4.26617	3.28471	10.4845	11.8397	-0.659775	9.00435	7.43985	4.1967	3.29974	4.75023	-0.347967	1.28502	4.66447	-1.57433	2.75319	10.6463	4.59501	5.58134	9.69274	7.45189	7.04162	4.89874	0.0122493	3.25254	5.10886	8.95836	11.785	6.55361	6.74834	8.19376	5.78891	2.13183	4.43838	11.6639	2.72561	2.76028	6.91573	13.7669	2.88492	8.14297	5.62779	8.1929	2.37303	1.5633	5.23052	1.03229
CA7	0.0985189	0.738378	1.17165	0.941815	1.47267	1.13338	0.692033	0.648074	1.25511	1.30307	0.790297	0.751096	0.981259	1.04787	1.10113	0.804743	0.873843	0.737589	0.601999	1.15842	1.32569	0.937386	0.458603	1.11877	0.773876	0.736719	1.24997	0.952327	1.2254	0.743944	1.20531	0.893128	0.796254	0.835555	0.968324	1.17775	0.784215	0.975861	0.828878	1.14628	0.800621	1.10435	0.415341	1.15845	1.02934	0.90724	1.06008	0.581555	1.43097
GAA	25.0982	26.9436	24.6392	24.4949	26.8144	26.1276	29.1966	28.282	28.1869	25.3278	25.0714	22.9073	23.8778	29.2097	29.6188	28.7413	28.6491	30.5597	25.3721	22.356	27.2254	24.2443	30.9817	24.5426	28.0236	27.5628	28.4303	24.3463	30.9658	26.4554	23.6004	24.8646	23.9038	26.6564	28.9638	28.7092	29.0234	27.5084	19.0261	27.4285	29.6768	27.6086	25.9034	25.8727	26.1087	30.2147	28.2033	26.2859	21.9576
MTHFD1	5.32849	7.09517	5.88696	6.38422	5.77509	4.8944	9.89594	4.00643	10.7689	7.27234	7.40068	6.33288	8.09584	6.08004	6.10987	6.20536	8.34166	3.57151	4.10122	4.4561	5.55407	5.30072	6.01215	6.89398	3.94965	3.47141	5.49166	4.56765	4.67254	4.90443	4.73214	4.817	6.70118	3.26107	5.95329	5.52263	5.8729	8.26713	8.64257	6.83999	3.64062	4.59404	7.12373	5.92454	7.30366	5.5019	4.00521	5.1496	4.98532
POLR2H	6.51849	9.66551	11.9668	10.5353	9.56587	7.13727	14.7816	6.11632	13.5736	11.7186	22.9193	10.0451	12.4955	11.6961	17.0946	12.5667	11.9193	6.45926	9.9995	20.4845	10.4511	12.578	10.0209	12.5945	11.1276	9.08258	7.32706	10.4195	13.3473	8.89408	10.8999	11.6148	6.25187	9.78842	12.6593	10.6364	7.59317	16.233	11.3008	11.3138	8.18392	15.7727	10.7291	16.3077	14.6162	7.07244	14.5483	9.29508	10.987
WARS2	4.40601	4.41105	5.59072	0.640329	2.53445	3.99087	5.89048	3.42621	4.40987	3.2429	1.1134	6.49269	3.38059	3.72971	4.74332	4.95418	3.1259	2.47934	4.61717	3.85509	2.8169	4.00448	2.28377	4.39411	3.56615	4.49153	3.7017	4.84839	4.66537	3.09673	4.22699	5.75609	3.04634	4.11823	2.94081	3.51289	3.23371	2.62432	3.83938	3.19422	3.77777	4.05183	2.97172	4.42776	4.03839	1.4326	2.4785	3.35186	4.21855
PLA2G12B	10.7952	1.78742	4.20433	2.12127	17.837	12.4441	-0.230909	4.81404	1.71806	1.25306	0.304595	7.45728	0.928839	0.747509	0.460774	-0.550054	1.05107	6.44918	2.32042	0.101487	0.6822	1.83941	8.50085	2.31375	0.65725	8.91504	-0.49798	6.89532	1.42388	15.043	1.23082	7.64383	2.62775	3.30287	0.110297	10.8762	11.3533	0.588162	1.72277	-0.49836	2.04243	0.546256	0.433831	-0.79506	-0.072792	1.49296	4.02724	2.63925	1.54466
POLD1	3.67656	4.61791	5.54719	4.89485	2.98795	2.97506	6.03469	3.99727	5.15657	4.64996	5.45801	3.06322	8.97676	4.91967	6.0457	6.55928	5.52101	4.76085	3.60951	5.68716	4.84598	4.88201	6.60032	6.43699	4.82534	5.00497	5.16917	3.32726	4.81559	3.67821	5.30628	3.23998	4.00734	4.15848	4.23363	4.21689	1.35014	5.00134	4.68893	4.84543	4.09204	4.25529	5.26173	2.62048	5.48327	4.95999	6.4259	4.04628	7.13243
INPP1	3.34571	5.33376	4.43225	4.55948	0.730712	3.17528	6.95067	5.20795	8.84456	6.87249	6.79006	3.005	3.51704	4.08384	3.64259	2.70282	3.81324	5.47573	4.19836	3.0667	5.16539	7.35428	3.80078	4.96656	3.30598	5.39905	3.64894	4.87916	2.91892	4.99425	5.90637	2.93376	2.85408	3.67603	4.81852	4.65111	2.68968	2.85661	3.5016	4.15727	3.87755	7.96893	5.35323	6.06439	4.36083	4.74558	4.66197	4.2443	3.57339
OGDH	22.4493	19.4096	21.4973	18.3921	21.3499	17.468	21.4125	19.4648	25.2361	22.3728	18.5813	17.0112	20.0504	24.5017	25.6667	19.5586	16.9419	19.1932	20.4951	19.718	16.1819	21.611	17.3487	21.9335	21.7385	21.0132	20.1886	20.2326	19.9765	17.8387	19.3049	17.9093	22.2968	20.747	23.4055	20.3498	18.7769	19.1485	20.5291	13.7742	16.9124	21.8396	19.2516	22.9392	25.2135	18.5309	16.0534	19.7627	18.2448
MAOA	30.4056	19.6038	25.0155	18.6645	30.5561	30.5061	26.8031	28.1253	16.8595	24.516	20.4725	22.1391	17.6702	17.0715	21.9327	18.9845	13.8883	26.3482	26.1713	28.8812	24.6757	27.4143	20.4648	27.7221	20.6874	24.3653	17.8021	22.0411	30.421	22.5722	15.7551	36.8186	27.4736	27.9088	24.9192	16.8768	29.4842	27.9926	26.1492	14.6291	30.3857	22.8016	20.6465	23.9309	22.2435	27.5841	13.4646	22.7037	22.0408
GMPR2	14.0639	13.6344	11.2251	11.2647	14.3621	12.948	18.4637	13.4209	11.4685	10.5388	14.2056	15.3984	14.2231	13.433	11.2188	12.6316	12.6149	12.8482	12.6155	10.9948	13.7227	12.5488	14.1252	11.9457	13.773	13.5434	14.1162	13.6013	7.01635	13.8858	13.079	15.2037	16.2809	13.4569	12.2349	14.5996	13.9712	15.1667	17.0166	13.5682	14.2716	10.8315	10.623	12.5043	15.1058	12.1225	8.67316	14.0527	13.6882
POLR3K	7.44111	5.68715	7.93408	4.89044	7.17019	6.59541	8.95018	3.62629	5.68583	6.62065	7.04096	6.87846	8.80411	7.84216	8.20027	8.10878	7.07181	3.36255	4.48669	6.36431	4.35619	7.0941	6.13884	7.37291	7.69157	6.2098	6.78091	5.80114	7.50762	8.10077	4.99239	6.93287	4.54319	8.30016	6.11535	7.38154	6.42222	7.27766	6.50963	6.49617	6.5245	4.90982	2.72483	8.82524	8.41859	2.80661	0.323869	5.5199	6.73781
UPP1	12.225	16.6423	18.2942	6.60211	-0.0228118	14.0119	7.01562	13.3567	19.7517	21.7353	16.3399	14.6552	14.7393	14.8643	18.8102	13.9583	17.1966	15.423	15.1262	14.812	25.3291	13.1008	21.0404	11.708	12.3009	12.2716	13.8091	14.3838	14.8115	13.9638	19.9796	9.21348	15.7766	14.7918	24.1558	16.403	10.3187	19.6165	10.96	13.9308	19.5325	14.9235	17.6883	16.1097	16.6955	10.6765	12.8404	16.3997	10.5351
MGST2	10.0166	7.14482	7.47564	6.69357	6.99178	7.76042	10.3698	8.75978	6.61144	5.26515	7.67884	10.2601	6.03658	3.02306	9.27747	7.12547	8.01093	8.56945	7.95958	7.38927	8.15509	11.653	5.17843	11.8346	12.4055	10.9741	6.86198	10.3948	8.693	10.0127	8.1809	8.91131	5.90487	9.34973	11.1675	7.48074	9.72574	7.68885	4.63356	10.8956	8.64905	8.86671	6.9214	8.56091	10.0118	8.58571	5.25521	8.73258	4.98925
RDH11	9.79964	9.03315	7.43086	9.85198	7.64023	8.05726	13.2579	8.45384	13.2385	10.7953	12.1125	9.38073	10.5989	9.47503	8.7197	9.40051	11.2261	9.08411	6.50496	8.81847	9.13775	10.7328	7.75519	10.9263	8.82452	8.1902	8.76688	8.61686	11.4427	11.4901	9.11624	8.11305	7.43523	6.95492	11.3373	9.72423	10.757	7.76667	9.81964	11.3371	8.78312	8.21239	10.672	9.68453	10.8795	9.88107	8.71791	9.35221	9.40508
CMPK2	3.72466	7.26464	5.73776	1.28185	4.69268	4.9005	0.951952	6.33197	-1.46306	2.55772	2.52364	4.03224	2.25368	5.78764	2.30705	4.25398	2.92532	5.58335	3.09598	3.11411	3.68114	4.77069	7.23312	-0.215865	4.20412	4.8959	5.23934	6.38828	2.84156	3.18293	2.93058	3.14333	4.11856	3.65042	3.82515	7.8031	2.75031	3.69356	4.60433	3.14613	5.40945	4.62626	6.55317	2.11079	4.76053	6.27995	3.4521	6.98657	6.36806
PRIM2	2.88347	3.72793	4.17879	2.32674	0.230675	4.80099	4.92903	1.03628	4.63646	3.16173	2.83706	2.1158	4.04964	3.45186	3.14948	3.81282	2.52893	1.08442	1.75066	3.63588	2.75997	2.70288	4.18158	4.58189	1.20361	1.38623	3.32095	2.38629	1.93907	1.1442	3.36574	1.95096	1.39685	1.35839	2.8962	1.96159	1.97541	3.93796	4.48015	2.69191	1.52793	3.08027	3.2716	4.2695	3.69964	1.47763	2.44561	1.44645	3.10777
NAGK	6.56108	7.52551	6.72539	5.95196	2.80178	5.387	4.92168	5.91924	4.55892	5.03948	5.25539	5.15643	6.79553	4.27816	7.61648	7.17305	5.62781	6.44535	6.06041	5.25522	6.39946	8.41159	7.55936	6.68201	6.83159	6.84784	7.69009	6.94468	4.98815	6.30305	7.84233	3.84736	3.09316	5.79803	4.68929	8.26494	5.14439	6.55931	7.00028	7.8101	5.85221	5.09164	5.05548	4.57821	7.5708	6.57879	4.34232	7.78723	7.25171
LTC4S	1.11489	0.99369	1.03986	1.17143	1.00062	1.09848	0.908472	1.13152	0.886323	0.854893	0.866783	1.08031	1.05359	0.987877	1.02799	0.965833	1.02336	1.11042	1.11006	0.923826	1.24537	1.08679	1.03896	1.01506	1.09371	1.07193	1.14994	1.05615	0.956883	1.05262	1.14996	1.04698	1.12496	1.0288	0.963969	1.09678	1.02644	0.918175	1.04482	1.01946	1.10048	1.00314	1.01857	0.920621	0.919484	1.09391	0.909448	1.10226	1.0528
SI	0.685927	0.70352	0.670854	0.634451	0.691181	0.680519	0.680336	0.697394	0.65517	0.6493	0.668628	0.692519	0.672225	0.70743	0.675971	0.712742	0.719513	0.677768	0.680411	0.699445	0.657993	0.687693	0.667958	0.658838	0.692472	0.699286	0.666083	0.723641	0.712136	0.720547	0.674865	0.650536	0.676517	0.664079	0.668016	0.676633	0.673289	0.687727	0.660123	0.659635	0.673849	0.650876	0.677907	0.669187	0.696269	0.713037	0.67751	0.695059	0.649935
ALDH5A1	7.86759	5.16609	5.81628	4.101	8.54887	7.11642	5.62855	6.75986	2.31145	5.42709	6.83017	5.63475	4.12535	5.59608	3.01207	6.78868	3.59513	4.79204	4.34488	4.05075	4.21353	4.47656	2.432	6.75435	7.79071	7.96051	5.00764	5.92159	5.64334	6.61516	1.60976	7.4877	6.83307	6.62991	2.43868	5.69845	7.71213	6.12471	5.73188	3.23692	6.6663	5.20513	0.40134	5.78766	7.02116	4.54571	5.39147	5.37405	5.30186
MCEE	6.39384	4.83344	6.72205	5.63654	7.67501	4.44814	7.15585	5.16682	5.09937	3.0947	5.09076	7.85421	4.77706	5.23463	6.36889	6.0027	5.52642	4.24654	6.13025	3.81592	5.13334	5.15616	3.51755	4.87289	3.95969	6.24084	5.9759	6.2341	0.694225	5.48344	7.04172	8.25157	4.45586	4.70562	3.95596	6.25877	8.47119	6.83348	5.91783	4.46238	4.89875	4.69797	4.42688	5.99144	4.72008	2.84423	3.27886	5.48216	7.85772
POLA1	2.50478	3.51303	2.62225	2.02006	0.53734	2.72495	4.67013	2.23865	3.69777	3.51646	3.56494	2.17264	3.73969	3.40903	3.69542	2.36646	2.56528	1.74657	1.83446	3.64682	1.7405	2.71965	2.22136	2.96637	1.73229	2.68577	2.07371	2.31129	2.22734	1.60201	2.83769	0.841433	2.01295	1.98454	3.00913	1.81173	2.25455	3.82749	5.99552	3.56434	3.53909	1.76941	3.26952	3.96609	3.56607	2.01305	3.29526	1.95872	2.77217
CYP1B1	14.0088	18.9894	13.3523	18.1953	22.7196	13.7574	-3.98071	11.6309	-0.620176	-9.02971	8.39105	25.9036	17.3298	12.092	9.81035	17.7641	20.9274	15.4186	12.5873	15.8477	23.7995	16.1389	19.2527	10.5099	17.5567	9.8405	21.6924	13.2392	8.31719	10.9274	21.6073	10.9253	8.00444	8.76849	20.3923	19.9652	10.8215	12.309	13.1093	15.7318	15.4847	16.8606	15.7756	-10.7296	-3.60648	16.6651	12.5199	15.5018	21.1313
HK3	3.49561	5.07502	4.40331	4.40639	2.72567	10.244	2.21578	9.93114	0.981661	-1.00355	6.03582	6.07908	4.47815	4.37035	3.36491	7.96407	8.35108	14.4944	8.53798	4.78064	9.37754	3.08173	12.5591	1.07884	6.45343	5.60476	8.35372	6.30343	0.798803	4.25056	4.49001	3.35165	3.88926	9.78519	9.89407	12.7212	7.0347	8.5381	8.12303	7.22888	13.6355	6.14783	5.58667	-1.3994	2.47278	11.2683	5.93208	8.16163	6.12331
BHMT	2.75826	-1.45183	4.63509	2.23837	3.4381	1.1856	-3.04478	-2.21662	-2.61798	6.79801	3.38605	-5.42629	8.8345	-1.14671	-3.219	-4.65921	1.42704	-3.43844	-0.523922	0.378841	-3.06639	0.393023	-1.5651	0.0984836	0.645191	-1.25924	-3.18342	-1.20364	6.02646	-1.85525	-2.64379	-1.6134	40.5639	-0.0812356	2.44615	-1.85585	6.17381	-2.2676	-3.11315	0.182716	0.616483	7.29224	-0.450322	-1.70192	-4.93762	3.08447	3.22582	0.618777	-0.708929
PFKP	18.5947	19.9932	20.8599	24.4921	26.0192	16.7558	23.5419	14.995	23.9701	21.5575	26.7622	22.7364	25.9217	30.5818	20.4637	25.1324	23.0351	16.9391	26.6078	20.2639	23.7633	24.2635	25.0331	24.3596	20.803	20.0841	18.8467	25.1682	26.8932	28.3201	22.0244	20.3562	14.9166	14.9955	25.4243	26.3201	25.8746	24.2614	26.5959	21.6067	20.8513	29.0122	26.8326	24.0146	23.5649	21.7666	30.0566	24.7207	19.6407
PEMT	6.84209	6.48099	6.67147	8.55577	7.79548	6.53579	8.90196	7.0908	7.34582	7.1623	4.54108	7.98195	7.24798	5.58989	7.95798	6.07452	3.39981	5.46882	7.12657	4.57905	3.48301	7.41277	3.0575	11.4394	4.67228	6.30342	5.15692	6.89503	8.83971	4.7207	8.28308	8.9213	6.4571	6.79016	3.68324	5.96645	11.3043	8.99393	7.46784	6.07869	3.25702	7.75778	7.24717	7.14968	10.6089	3.65161	4.45102	2.85764	4.61727
POLR2I	8.20861	10.9859	11.7377	10.8915	9.77676	9.3654	12.1921	9.82409	10.6053	12.6157	11.0645	13.7813	15.2265	17.9129	13.5314	13.8968	11.4279	8.177	10.3303	14.2313	11.3796	9.93025	12.6565	13.7667	8.74103	10.6115	12.84	15.5681	8.55415	11.8318	10.9243	9.68401	10.2198	8.07593	9.3747	10.2571	5.4253	13.4515	12.3625	11.2669	10.496	14.389	10.8377	10.742	14.1273	9.22475	15.5528	12.3561	12.2466
PIK3C3	1.56434	2.61703	2.1323	1.62878	1.62199	1.79064	1.40391	3.60836	3.38095	4.5091	2.63541	2.85745	1.92336	0.65133	1.62567	1.82744	1.83772	3.23197	2.13116	1.57066	0.979763	1.61048	2.17588	2.59578	1.73069	3.45587	2.12895	2.20736	1.91308	2.3862	2.20937	2.13784	1.84374	2.71566	2.33906	1.79248	2.82607	1.42318	2.11876	1.24479	1.53913	1.1135	2.11091	1.96468	1.69828	2.84798	0.786431	2.33417	1.572
GALK1	5.42378	7.29346	11.8219	3.89174	8.68365	4.15211	6.38515	4.36804	7.05922	8.96205	6.16484	6.81122	8.68728	8.60721	8.97627	9.70912	6.71217	7.01105	4.24258	5.00874	7.77783	5.49259	9.45048	6.43345	6.1001	4.94369	8.19353	8.19009	7.91872	5.67534	6.56324	7.92456	5.56038	3.19943	3.96178	8.64337	8.06459	8.38635	6.47452	5.21409	4.08129	6.98284	6.14938	6.95758	9.02612	6.65817	5.25855	7.46345	7.57222
ALDH3B1	18.6681	17.5928	20.5968	15.0762	26.912	17.8481	10.4741	21.7611	10.4373	10.8244	10.1743	15.6835	10.9851	17.7606	8.48558	20.0248	15.0242	21.1867	21.6663	12.508	15.9943	13.5666	17.5094	11.8639	17.0885	20.7694	16.9932	23.0148	20.8451	19.5996	12.7681	24.5637	20.7624	19.417	12.7771	17.8081	24.3727	19.9735	12.7461	12.5458	17.6484	10.0872	10.0848	7.7954	9.35036	20.304	15.413	17.8332	13.8013
B4GALT6	-0.467784	0.130465	1.66358	0.700494	-0.2878	0.266021	1.45077	0.491527	1.23512	2.58137	1.90374	0.676853	1.11322	0.997375	4.29376	-0.529335	1.14825	0.342079	0.967795	2.5122	0.219193	1.27254	0.200659	2.26569	1.90141	0.171465	0.0946464	0.971963	2.19787	0.639236	0.945726	0.521161	-0.319144	-0.40406	1.66648	0.0559379	2.37823	2.59301	2.08158	1.08404	-0.093991	1.25215	1.22398	1.95837	1.9848	1.2914	1.74148	1.46985	1.18274
PAPSS2	21.4606	18.1553	22.4126	20.4474	16.8624	23.3256	8.21161	27.1867	6.35791	9.51062	15.3761	27.8354	21.0152	15.9188	9.80275	19.7149	17.7273	26.7245	19.1713	18.0792	15.3423	22.1657	24.5919	14.5904	22.2872	26.1707	23.6878	25.475	21.3995	28.8018	21.7956	19.5709	26.0302	20.8052	18.2753	18.3877	21.6269	15.3689	20.518	18.1832	22.748	13.9325	17.5559	6.38449	4.99104	28.3822	16.4268	23.7491	17.282
GLUL	63.7619	57.7016	61.0811	60.2196	61.2278	65.6489	70.6221	63.789	54.8243	57.3423	60.6663	64.4681	63.2375	60.6149	62.2946	65.6129	61.0521	64.14	62.5839	61.477	69.2091	73.1393	65.7633	63.9024	67.4953	60.6739	67.374	62.4423	58.2468	61.8156	62.6969	63.3438	59.9544	61.9076	70.2324	65.9737	62.1478	66.1993	64.5437	62.1975	64.9951	68.784	62.0533	63.6686	64.024	67.1352	53.7488	62.2346	63.852
ALDH2	22.6221	15.5915	23.3315	20.1653	23.6343	25.1985	19.4206	25.9945	10.1391	17.6245	16.2617	23.5332	20.3804	12.0936	16.5313	22.5243	16.2394	28.1906	22.3679	17.7187	22.1924	19.2889	20.7636	20.4146	29.9857	24.9133	20.942	23.3488	17.5312	21.3061	17.0101	25.3718	23.8941	25.4121	14.173	23.7884	27.3636	16.5218	21.3954	17.6399	24.9305	13.0777	15.4339	11.7878	15.8021	25.6056	14.0919	20.6713	20.3503
HNMT	13.8586	12.0097	13.5369	9.08658	8.51062	14.6363	2.70271	14.8083	3.94415	1.20947	5.34075	17.3951	7.75161	9.4314	7.35893	11.41	10.2977	13.5078	12.9067	9.13012	16.0562	7.47144	13.3606	8.09681	12.5806	16.1353	14.5982	14.3396	10.0166	11.8669	11.926	11.0655	15.3765	14.2996	7.9125	13.0387	13.6508	12.0522	9.01077	12.0553	15.7338	8.06846	7.47427	0.936935	2.33856	12.0146	8.89658	14.2151	9.67145
CHAT	1.11669	0.403223	0.994653	1.51451	1.2975	1.0387	0.86354	0.440997	0.571955	1.13718	1.68817	1.28563	0.475512	1.01749	1.15911	-0.274246	0.427731	1.944	1.18738	1.47697	0.836966	1.15198	2.25776	0.475585	1.08179	0.334005	0.409712	0.504603	1.53852	0.769926	0.961894	1.90835	1.84524	0.500138	1.04175	1.32173	1.60083	1.03483	0.700216	0.952247	0.829324	1.00014	0.732953	0.850641	0.595039	0.87038	1.07599	1.00088	0.651949
AGMAT	0.34935	1.30145	1.64328	2.13658	1.28792	0.388179	1.9391	-0.209056	1.90706	1.22231	0.583821	2.61242	2.51413	1.5627	0.446421	2.54736	2.70393	-0.10866	0.61172	1.198	0.552586	1.87305	1.36546	0.605917	3.97587	1.08571	1.70145	2.46463	1.64904	3.72488	0.971865	2.73937	0.441609	0.721955	1.71778	2.24657	1.90444	2.36267	3.64735	0.450127	0.133413	1.12399	1.33688	1.15724	1.21047	0.977206	2.06195	1.57793	2.20117
GK	3.41583	2.14833	0.548595	2.69838	0.726924	11.9401	3.14375	5.74731	-2.70803	3.026	2.52041	9.75858	3.15224	2.79864	2.6288	4.56615	6.40162	5.5311	10.8466	4.34801	2.84106	7.79505	5.74022	2.42071	12.9701	5.51729	9.02543	4.48305	7.71656	12.2465	6.61349	2.20292	8.60947	11.67	1.42095	8.00228	9.05809	6.2647	6.26111	4.93925	5.30228	1.71667	2.91321	3.53277	6.7951	2.42432	3.50242	6.19989	5.39088
PIP5K1C	6.57111	7.18105	3.0225	5.55581	5.11138	6.88528	4.63148	8.53945	5.53524	6.4858	7.29954	4.3111	7.55723	3.67429	5.04109	6.09362	5.18889	8.68456	6.69906	6.21923	6.36269	6.73735	8.22846	6.85689	5.85494	6.64756	6.23211	6.37081	6.77352	8.24026	6.59383	6.73523	5.60992	6.44083	7.37642	5.53904	4.4524	4.47026	4.89323	5.94023	6.85559	7.19471	6.13594	4.93708	5.4538	7.85338	9.17137	5.11994	6.0722
UAP1	15.9297	14.465	18.4785	16.4598	18.2515	12.904	16.0112	12.3668	19.9769	16.7049	15.1279	20.2183	14.8272	21.3014	14.5653	22.8606	16.6894	11.1889	16.1157	15.5979	13.6666	14.8834	17.11	15.1059	17.7026	15.3707	17.8189	16.4431	14.3213	17.1738	17.7331	19.9276	16.4887	16.0124	14.4122	17.8863	17.6517	18.729	21.191	13.5862	15.285	18.2686	16.4012	14.893	12.8195	14.0355	15.0148	14.0628	18.4661
AK2	20.4327	19.6063	19.0861	16.5139	21.479	23.8164	19.3162	17.8866	18.915	17.4592	15.3075	20.7101	19.3722	20.8156	16.0825	20.2451	18.1239	17.3464	21.2909	19.8926	19.4867	18.7703	21.3968	18.2722	19.7846	16.9745	22.0386	19.5626	15.0984	19.3554	19.4464	21.7668	23.3383	19.6177	16.2961	20.2606	16.0629	17.7287	20.724	14.8382	19.5986	20.6746	18.6849	13.3522	15.8887	15.7045	15.2401	19.8477	21.1201
PLCD3	1.4103	3.09691	0.275494	4.00541	3.46334	1.9815	3.27036	3.11522	6.89381	4.63954	5.05476	3.48622	4.40061	8.39495	2.01923	0.515476	3.05521	1.75751	3.3574	3.56368	1.85355	4.5219	2.08434	3.73294	2.06725	0.564418	0.169965	3.57709	6.38487	3.13487	4.86113	4.34332	0.967021	1.37302	2.31359	1.87977	3.51015	0.149041	2.77898	3.86944	1.89332	2.64258	5.02883	7.79584	4.64414	4.38312	0.865471	2.88495	2.14234
AZIN2	1.46305	1.82055	2.44263	1.64103	2.46214	2.6923	1.05098	1.07224	1.05893	1.29853	1.2579	2.03809	1.70373	1.81395	1.6102	2.43944	2.04952	1.45273	2.74114	1.15696	2.88453	1.64272	3.397	1.98904	2.3165	1.26747	2.93147	1.77813	1.81691	1.53238	3.08535	2.48454	3.40375	1.71733	1.45714	3.26632	1.52625	2.04943	1.81215	1.9693	2.61122	1.02917	2.19452	0.801403	0.499759	0.858577	1.78331	2.46922	2.67279
PLA2G2A	6.42714	11.7335	-1.85864	12.5444	4.23739	4.91068	11.4424	7.38025	-0.0362363	-1.58522	-2.64128	9.62745	4.60956	9.69586	-3.78898	1.88469	17.0281	18.2608	16.3829	0.428787	4.21966	14.0909	3.59608	7.22935	19.0928	12.1255	23.3931	19.0345	2.66963	16.9785	11.586	3.4524	-0.279809	6.16464	-2.67439	11.5608	5.81031	-0.157531	9.79591	10.9833	-0.21719	-0.258977	3.09886	-0.572068	1.58541	16.1103	-2.21626	16.9603	9.07226
FMO5	14.3248	9.36857	22.034	0.474989	10.5549	21.0513	3.53007	12.7534	-0.36702	-0.218359	0.253953	25.8838	3.62558	2.47539	-0.951913	20.8936	5.30056	13.3325	27.7216	4.51571	16.6545	3.32771	19.1184	3.48576	14.0264	22.3688	7.71122	15.1979	15.7702	15.4357	1.79219	19.2827	28.596	24.1458	1.2285	9.50477	22.773	19.108	9.29352	3.8989	21.0829	7.30563	2.82613	4.23399	3.9897	13.5494	16.4833	16.2632	10.4509
CTPS1	6.24556	4.66774	8.84319	3.21184	5.64106	3.65653	6.33915	2.49896	8.64858	4.57786	4.14317	3.9832	6.81971	10.5046	6.25622	4.55354	5.69244	0.89504	3.39434	11.8276	-1.54323	7.41701	2.64096	7.96863	5.22697	5.46887	2.93939	4.51669	5.37224	5.61267	8.45358	2.8322	4.16536	1.56418	5.51869	2.71088	0.980366	3.69176	7.05982	5.43854	0.286335	7.03252	7.16601	6.25016	6.43513	2.14618	3.07842	1.64914	7.03232
TPH2	0.761923	0.689142	0.690228	0.697069	0.782665	0.794611	0.662718	0.762789	0.802281	0.71499	0.736295	0.692192	0.765175	0.816499	0.701882	0.748301	0.820752	0.729935	0.707733	0.784704	0.768922	0.708473	0.718371	0.715398	0.752358	0.717557	0.734141	0.677511	0.748261	0.690185	0.723671	0.808601	0.782628	0.741313	0.726445	0.775407	0.761317	0.754448	0.72712	0.7353	0.731589	0.731621	0.76968	0.795627	0.768364	0.715892	0.815369	0.749122	0.698209
GLS2	1.1306	0.8463	1.35247	0.787542	1.36124	1.33317	0.911244	0.889446	0.692723	0.987085	0.920867	1.04447	1.23846	0.755274	1.16684	1.29079	0.843722	0.841376	0.879285	0.9241	0.78486	1.12943	1.01993	0.918942	0.649146	0.906667	0.775897	0.897643	1.00068	0.789323	0.670371	1.28906	1.26286	1.40781	0.738007	0.822766	1.1336	1.10497	0.79627	0.944977	1.07627	1.09212	0.895041	0.888626	1.24075	0.778226	0.835656	1.00696	0.757188
HCCS	6.52415	9.0546	5.06223	5.21435	3.06747	7.46557	10.5693	5.52327	9.76221	9.97458	7.32952	5.97985	8.37662	8.73822	8.4637	9.17531	6.76358	4.14504	5.54105	6.84639	6.09896	7.61547	7.46917	8.04162	6.76446	4.57112	6.40141	8.24136	6.54998	7.67066	8.34673	5.45942	3.83066	4.15767	7.71391	8.46261	6.4222	9.93238	11.7531	7.97563	8.44256	5.28667	8.65598	10.5046	10.2008	5.99231	8.05389	8.28672	7.74515
MPI	3.28514	3.29015	4.42171	2.98131	1.8552	2.64972	4.09281	2.60394	5.19682	3.79417	3.79706	3.92228	3.35194	3.55235	6.28068	2.66029	3.85191	1.2318	3.24654	3.17555	4.02604	3.84743	2.9897	4.98356	4.42782	3.17402	3.58307	2.73721	3.72731	4.40386	4.52426	6.31725	4.17725	1.06998	3.36796	3.62475	3.20672	4.05243	6.10637	3.45956	4.27591	3.71556	5.01085	4.72402	4.17433	1.96092	1.75772	3.93633	3.81541
DLAT	6.95761	10.6844	10.8613	6.35194	8.95547	5.48204	13.8135	6.21548	13.9487	8.56519	7.43121	10.4679	8.21642	8.00301	9.11674	6.13829	6.70676	4.31404	9.13605	9.06581	12.6903	8.76033	7.55952	10.4486	9.94307	5.65759	9.03459	10.8536	11.1239	12.8202	10.8359	11.0295	8.27602	1.46574	5.95918	10.8058	10.6445	13.4558	11.1296	7.02107	7.26708	6.04077	10.1681	9.45531	11.4542	4.92551	10.2102	5.91172	6.80564
LPCAT2	4.33953	4.19573	4.17499	3.43928	2.21382	4.70434	5.64313	4.69079	6.25487	6.56417	3.34249	4.75443	3.72877	6.45434	3.91965	3.96594	2.41971	3.30015	3.81604	2.60978	5.36784	5.13125	4.93908	4.08402	3.31171	4.69524	5.18997	3.74082	-0.296166	4.72221	5.19682	2.91152	3.65319	5.79814	4.30803	4.00513	3.412	3.03925	3.02501	5.22929	5.85349	3.96679	7.46196	5.23714	5.14361	4.10011	2.00481	3.50479	3.78739
FMO3	5.06085	5.6506	4.91192	6.56125	1.43236	5.44569	2.19944	8.07208	-4.13687	4.4243	2.06169	4.66722	1.18843	-2.07219	3.92944	1.27647	3.71178	6.71521	6.74865	3.06507	4.66502	2.79574	4.73504	5.627	6.56414	6.89156	6.8087	6.19725	2.72307	8.54652	5.51609	5.92668	2.9571	6.53317	1.01678	4.9404	3.48583	7.63451	1.8624	5.21485	3.90226	6.12762	3.64522	5.05801	2.59382	6.87515	-0.237072	7.55027	3.33957
TPH1	0.460977	0.507165	0.414278	0.620049	0.562256	0.534056	0.415978	0.492057	0.502417	0.614146	0.496868	0.414933	0.442581	0.49252	0.479109	0.691659	0.51033	0.410462	0.451021	0.44646	0.554766	0.539817	0.484344	0.467377	0.393499	0.50315	0.414729	0.416221	0.45303	0.421473	0.519259	0.44497	0.439885	0.526142	0.511211	0.478664	0.516002	0.501762	1.85458	0.409999	0.465208	0.389913	0.480603	0.538057	0.496309	0.530905	0.541558	0.551296	0.535348
TRDMT1	2.75028	1.74718	1.95175	0.70922	2.64011	2.02614	-1.616	1.05236	-0.619795	0.00738825	0.221825	2.26359	2.65947	1.16423	0.170761	1.45252	1.49659	1.44668	1.26292	1.33298	1.011	0.75275	1.18806	2.10987	0.229899	0.529628	1.97062	1.89227	-0.561992	1.36169	1.05162	0.699444	1.25755	1.91654	0.266936	1.98926	2.04256	0.701051	2.47696	1.10563	1.57676	0.963788	0.915262	1.43098	1.00953	1.27699	2.82196	1.7456	1.80281
SYNJ2	4.06405	3.95077	3.76689	4.01032	1.89667	2.64918	2.45437	0.194574	4.44029	2.81691	1.82028	1.40938	3.74839	4.56187	1.97605	2.7812	2.57694	0.948241	3.10683	3.96429	3.69245	3.26919	3.32159	2.35977	3.45704	1.68783	2.43884	3.49171	2.47742	3.30718	3.96723	1.6307	1.44507	0.409514	4.09631	2.63652	2.49696	2.54417	5.24593	3.20098	1.92581	3.06804	5.06945	2.81797	3.72564	1.48462	1.10026	2.8748	1.78713
OGDHL	-0.105424	0.7013	1.49104	0.370748	0.705037	-0.487453	0.569152	-0.487292	-0.108336	2.26555	2.72179	0.835896	2.6035	2.62335	0.834445	0.598386	0.101429	0.0955117	-0.0218395	0.368517	1.53408	0.843485	1.37656	1.62757	3.25225	0.946107	-0.192063	-0.0836482	-0.0601766	0.0594541	0.310569	0.329291	0.199769	-0.392519	1.40861	-0.00159285	-0.0786813	1.97132	0.200816	0.268971	0.0922471	0.476158	0.0558801	3.88144	0.743744	-0.177164	-0.299744	0.43196	0.280353
GAD2	0.755412	0.80446	0.797959	0.776095	0.838575	0.804782	0.76949	0.763668	0.812738	0.800335	0.772795	0.801717	0.76961	0.773524	0.784527	0.773362	0.820251	0.772714	0.754597	0.782543	0.828941	0.791455	0.764708	0.784894	0.785223	0.776505	0.753412	0.773977	0.834138	0.751588	0.765324	0.778167	0.779883	0.760533	0.76848	0.790976	0.809194	0.766926	0.76097	0.755179	0.78998	0.7671	0.779138	0.795677	0.765715	0.795241	0.824029	0.790518	0.789428
GMPR	4.05939	6.42959	3.70416	2.30982	6.96248	5.06259	0.206864	5.78663	-0.00715348	0.801724	-1.2027	3.98513	0.977723	0.448336	3.81796	1.8774	2.53602	6.89167	3.90416	0.902005	3.06325	-1.26298	6.4543	0.502621	3.73514	3.28812	2.67866	4.75974	1.897	5.7672	-0.474978	7.15898	1.44785	4.21408	-0.107713	6.06221	4.86001	3.98764	2.68508	2.07769	3.68276	0.50127	2.85527	3.69905	6.41013	4.70719	1.52856	5.36662	3.99205
AGPAT2	50.9213	52.012	51.4098	44.1617	49.3513	50.0085	47.2003	49.8912	47.8014	48.2067	48.1056	55.7622	47.5723	53.5155	44.6038	53.6584	45.516	49.9769	50.8943	48.4683	48.584	46.5896	51.8088	44.119	46.397	48.3378	49.4263	50.939	51.9899	59.6589	46.1821	51.9117	55.0198	50.6578	48.1511	49.6357	50.4563	52.5004	50.4065	47.6418	53.235	48.1149	44.7514	49.9738	48.1241	49.9482	50.208	50.9803	47.933
ADH1B	22.4091	19.5995	17.3828	19.8724	18.9	27.2087	-0.98848	30.9367	4.23054	-7.1448	-2.28452	23.9862	3.89079	0.559566	-6.23033	-2.08773	18.408	31.0098	22.7973	17.9761	12.0488	19.8073	12.0029	10.9743	19.3396	27.3112	23.1712	20.6659	11.2116	18.6328	7.2261	17.4718	18.6105	21.5657	1.532	22.4997	19.166	10.7577	13.2289	15.9802	15.0991	4.01463	-1.38852	-6.60656	-5.65006	30.0771	5.07037	28.8538	19.828
OTC	0.460858	0.73542	0.777206	0.935868	0.745717	0.706231	0.746836	1.21581	0.802155	0.977384	0.827752	0.828455	0.521626	0.702742	0.758297	0.685183	0.841186	1.07268	0.754761	0.72934	0.740315	1.03807	0.621541	0.679003	0.798363	1.05071	0.756799	0.582518	0.803355	0.707231	0.979808	1.34808	1.03237	0.707276	0.833954	0.953941	0.862687	0.690058	0.942056	1.1247	0.683847	0.795053	0.955899	1.02309	0.70024	0.794725	0.818292	0.772666	0.823411
UMPS	1.48032	3.23474	3.48331	2.97358	2.68577	1.97619	5.69834	1.58287	4.67814	6.26387	3.95536	3.67144	4.53558	3.76878	3.42317	4.76298	3.21787	1.45107	2.683	5.09455	2.36734	4.9769	3.26011	5.39518	2.88996	1.95716	2.13017	3.00171	3.52542	1.77006	3.39101	3.21962	2.39115	1.74371	3.84084	3.26497	2.11053	5.28262	4.30228	4.64118	1.3373	2.25799	2.738	7.14837	5.99132	2.07569	2.11542	2.20848	2.3201
PGP	4.7878	3.74905	9.32335	6.03582	6.35241	4.24241	7.03861	4.06114	4.49658	5.52157	5.86486	0.228031	7.28716	8.07211	5.41675	6.40154	7.98847	3.70784	4.55817	4.74497	3.54909	4.53593	5.09619	4.57471	7.76204	2.70963	6.65629	6.03797	6.94329	8.91424	5.85034	4.73061	3.03403	3.72062	4.87728	5.8605	3.80725	6.21199	6.58911	6.23089	3.43367	4.99996	5.49702	6.53501	9.08942	2.6945	3.00275	4.49926	8.79066
XDH	11.401	3.81613	4.29199	2.93725	1.61971	3.37145	9.60663	1.05952	14.1291	13.2021	3.55502	1.22782	4.56383	-0.505567	0.552107	-3.43866	-3.73489	-1.92588	0.867245	3.64379	16.7806	7.19368	7.48618	3.2316	10.4688	7.3716	-1.95238	4.95883	5.19279	2.16798	9.6896	6.45108	1.74253	10.4591	8.77733	6.31714	7.25092	5.58971	-1.47737	1.40504	18.624	9.98856	7.72983	8.9018	0.838108	2.60101	-1.00999	10.921	-5.02554
AMPD2	7.63979	4.92302	7.98109	4.59462	0.899173	7.48568	5.54523	5.62979	5.39122	3.48018	3.80416	4.85449	6.11354	4.91327	3.27667	6.25619	5.8453	5.22611	5.29269	4.06507	4.74555	4.26194	6.97185	5.27728	7.15955	4.95835	7.28513	5.39959	5.71552	6.57844	6.64039	4.42137	3.0228	5.93614	5.67161	4.22394	2.58139	4.35381	4.57028	3.89325	4.56115	3.26867	5.01841	3.74735	3.90868	4.98317	5.60568	4.1384	7.10425
ECI2	7.31475	4.46839	12.1244	6.35915	13.0888	5.61568	6.86953	8.4248	3.51816	5.39669	6.34984	5.92374	8.48619	6.61652	9.72894	7.58383	3.90203	6.77433	4.21524	-1.46321	8.31915	0.697419	5.46	7.70912	10.5025	7.00776	6.95709	9.05225	8.74233	5.81324	4.34344	3.85841	3.80742	4.62156	2.19567	7.15014	9.26117	8.17526	11.264	6.89755	4.50317	3.30305	7.25682	10.5574	7.55446	3.65706	5.01051	5.35306	8.89748
PLCB2	3.29387	3.10747	3.18225	5.34495	7.26468	4.29356	1.7034	4.55545	2.55901	2.85755	3.20174	3.59496	3.4646	4.26439	3.62536	3.77341	6.01318	7.42684	5.05475	4.54205	7.68718	4.62919	4.87527	2.93001	5.29808	4.33598	4.71919	3.08513	7.47637	4.24965	6.4987	4.46665	5.04817	5.06649	3.96234	5.72243	6.72674	5.73539	2.74843	5.88136	8.74431	3.82138	2.42177	3.00976	2.3039	5.58697	6.83132	7.38866	5.51769
ME1	11.5001	5.23979	10.6532	13.6818	16.1941	9.16418	18.0596	6.66234	11.9865	13.2758	14.7692	7.72287	10.3804	8.22998	15.1323	12.7866	5.41439	6.67115	12.0082	10.252	8.23351	4.9831	5.60576	11.2071	11.7294	10.41	7.13511	8.15434	12.0009	12.5907	5.44057	11.3846	4.58857	9.09483	14.847	7.28571	16.9327	12.6043	10.3434	15.0127	9.63738	9.04761	6.22575	14.2379	18.0049	5.29712	11.4551	7.50449	5.6589
PLCD1	3.59223	4.11218	6.20714	4.20581	5.2738	4.54099	4.491	6.46914	5.27808	6.65132	2.86161	3.51519	5.05784	3.06495	4.66584	1.88081	3.38862	5.19806	6.85056	5.84215	4.05084	4.50555	5.12555	2.71975	3.31254	6.08375	3.27513	4.04067	3.65168	2.9322	3.37756	8.00225	3.7175	3.85638	5.93636	3.38629	4.0239	2.07901	2.66405	4.68267	3.8764	7.5326	2.72916	8.15279	10.8266	5.11707	2.10748	6.77685	3.83221
GOT2	13.5298	14.1378	19.0973	17.2571	18.8648	15.6635	22.2075	13.4611	18.5527	18.9074	15.1498	15.7182	16.2905	19.1948	15.6344	17.0522	14.3019	12.1468	14.1336	14.9082	13.784	20.307	12.6789	16.9057	16.3432	15.2178	13.6369	16.2762	15.6259	16.9377	14.6835	16.032	13.7817	13.2958	20.3477	15.5389	19.0191	15.6089	16.1146	17.5302	14.3756	19.0034	19.0981	21.9153	18.8287	16.7422	13.9004	13.8455	13.382
PDE3B	1.39392	1.76742	0.771219	2.17669	0.314133	1.9974	2.99825	3.40653	1.39593	0.858607	0.697685	1.32108	1.27151	0.0142213	1.49261	0.942206	1.35531	2.87936	2.48339	3.09781	0.475168	0.992085	1.17851	2.47754	1.54859	2.11589	2.76761	1.87115	5.06394	3.57343	2.35035	2.86721	0.350553	1.33536	1.54467	2.65995	3.14513	2.4121	5.523	1.04686	0.814863	2.42944	2.81932	0.403618	0.63535	2.74686	0.309506	1.63078	2.92651
UGT1A6	-1.47783	-0.637638	-1.84621	7.22197	1.8779	-2.07483	11.2721	0.196158	0.580774	6.34011	8.68833	-2.26673	7.94619	-1.96365	10.6391	13.152	-1.26122	-0.441386	-0.138194	6.9324	-1.0556	4.02311	0.228572	6.60212	-0.525655	-0.769434	-1.77652	13.2322	12.9576	-1.24855	0.401436	9.03187	-1.39892	-1.53973	5.34164	-0.405393	16.0506	9.72149	-1.77935	4.60686	-0.741466	6.45303	5.91702	6.04245	8.70353	4.96053	-0.508184	-1.52921	0.504029
GGT7	9.65328	8.91328	4.81465	3.87809	8.76989	5.04298	5.20289	5.92905	4.98588	5.54428	5.23465	5.85746	8.85563	2.59631	6.5438	8.79447	3.97144	6.43954	7.80348	4.38212	8.48159	3.5538	5.39394	6.04524	5.92554	8.27293	5.33457	5.48362	6.70703	4.90284	5.65619	9.93289	6.70381	8.06245	5.03203	5.07427	13.5459	8.58317	9.33209	5.20967	4.63299	5.70566	7.98172	7.14137	4.90333	6.44447	6.81092	4.92139	5.13361
LDHA	86.9053	89.5387	89.422	88.7934	86.7233	87.6352	89.8873	85.2138	92.2842	89.5475	90.8251	87.6999	90.4654	91.4686	88.9747	88.0507	89.7788	85.392	89.1387	90.2895	91.7723	86.8646	89.534	89.1896	88.6729	86.5812	88.6944	90.3391	89.8388	90.6952	89.6922	88.4049	89.6327	85.7236	89.8325	88.209	88.9258	89.1011	91.216	89.6874	91.1538	90.7696	91.8898	88.7344	86.0471	86.7261	88.6449	88.6913	89.7143
SMPD1	13.6568	13.4066	15.2979	9.97516	13.8328	12.2866	6.05743	12.9326	8.30935	9.32314	9.74973	11.6695	10.5188	8.51245	6.48305	12.9835	9.56596	11.0433	13.4091	10.4251	15.6731	8.4234	11.3577	11.6817	12.6513	11.9274	13.0153	14.6759	11.706	12.7111	13.4836	10.934	14.6774	11.3082	7.33959	12.1159	14.299	11.3338	15.1923	12.7242	13.7277	10.8647	11.7198	11.7957	9.7566	12.3493	8.42978	9.96244	10.0357
PIP4K2B	8.90862	12.2705	10.1806	10.2746	9.76085	9.46528	10.2334	9.62207	11.4405	9.0204	13.0784	10.2428	8.47681	12.0175	13.2859	13.3651	8.13237	8.83568	10.8752	10.8712	9.27248	8.49147	10.8236	10.0207	9.32393	7.76547	10.0817	10.1058	10.9143	9.50704	8.06259	11.1198	12.5079	9.79554	8.50036	10.117	10.4223	9.7294	12.0527	9.34846	10.1568	13.6501	9.01305	10.5078	12.4946	9.33867	7.42418	10.8041	10.4677
IMPA2	15.7171	14.0126	20.0905	17.2879	21.8145	13.6711	22.5303	15.2159	22.6681	21.9157	24.0455	17.002	20.0214	2.88197	22.8609	24.313	6.42672	13.2734	19.718	15.8706	7.24351	21.9392	16.8493	15.5195	14.701	17.4894	15.4468	18.4082	21.9279	20.6396	14.2589	24.0463	19.919	17.0033	13.1806	9.1894	24.6608	26.943	18.8086	10.745	12.2779	20.3201	4.96678	17.6902	21.0426	10.8676	9.49812	9.81399	19.9451
UPRT	4.24101	4.41607	4.59743	2.95293	2.87086	5.32347	1.74511	4.67815	2.45208	2.59299	3.74248	4.28104	2.32458	3.03977	3.92551	3.96646	3.96334	4.2107	4.03097	3.61068	4.23939	3.50236	4.56313	4.33037	3.96292	4.49098	4.90023	4.13414	1.59942	4.51309	4.10145	3.96476	3.76263	4.10745	2.9188	4.94484	4.35699	3.12209	4.333	4.34943	5.60671	4.80142	4.63705	3.59454	3.13921	4.65226	4.9654	4.46209	3.87683
AK3	10.7159	13.1428	10.9783	12.3432	14.2793	10.5004	12.4853	12.8889	11.5012	10.5902	14.1888	13.1837	9.81524	7.84076	13.7297	12.1322	12.6609	13.6814	12.5464	10.0165	14.4592	10.8457	9.88538	10.4608	7.97588	13.1993	11.6909	11.229	9.66741	11.9276	10.5214	12.5135	11.2451	12.3002	9.81741	12.2303	13.7008	12.9199	12.5417	10.3123	13.7482	7.81926	10.222	6.82659	12.4723	11.3227	9.33363	13.7042	8.12992
ACSM5	1.54865	0.870344	1.26687	0.969796	1.3698	1.18262	0.508867	1.59454	0.981379	0.804577	0.516649	1.03651	0.948599	1.17815	1.12304	0.561716	1.2354	1.8321	1.36248	1.21784	1.22266	1.14221	1.02857	0.769969	1.42196	0.931042	0.995058	1.04827	1.04234	1.29489	0.915209	1.34801	1.22334	1.28344	0.904226	2.0737	1.02355	0.951885	1.00378	1.35519	1.10928	0.83184	0.915408	0.632746	0.627495	1.32086	1.09675	1.45932	0.938999
FPGT	4.80368	3.93772	7.05205	3.04983	0.548635	5.13156	5.70394	2.86999	4.81255	3.68995	3.60674	5.2905	5.5622	3.37805	4.20375	5.26013	3.31619	3.40864	3.89199	3.70746	2.91459	4.4756	3.88458	5.985	3.85759	3.89912	5.01288	2.59368	3.3604	3.53644	3.68798	3.67675	2.78498	3.32359	0.912338	3.42874	3.03663	2.36386	6.12831	3.84315	5.49717	4.8506	3.36885	4.72477	4.36136	4.42318	6.27181	4.29919	6.42371
GLA	11.0353	9.36131	8.31847	9.43099	11.0962	10.1124	13.9972	9.3399	9.50641	8.73635	10.6988	6.86559	14.5199	9.13101	17.206	16.8847	9.8552	12.0011	9.56714	11.5085	6.47584	6.08212	12.5315	11.6674	14.3944	6.74231	14.515	10.5576	9.19691	11.3381	14.2674	6.13684	5.53537	10.3706	14.3523	14.635	9.70039	14.9183	11.9178	12.6624	11.9283	10.3954	6.90824	9.91739	13.7341	9.89351	13.2638	8.98235	10.747
ACSL4	13.1726	14.3672	11.641	17.6373	10.0317	14.3638	9.24165	22.459	13.0402	11.8038	13.1795	12.2155	11.8677	10.9091	8.97889	18.3757	15.6604	25.249	19.8939	11.3212	17.5357	10.4516	13.0125	11.8635	14.0589	17.8985	14.394	15.215	13.05	13.9045	18.1721	11.4081	20.8248	21.5652	11.5144	11.6735	22.28	15.0939	8.83069	9.61757	15.4638	13.4492	17.6797	9.52283	6.37427	12.7864	10.2717	15.5198	15.2256
ACSL5	44.3194	41.588	43.7803	31.9004	41.2332	51.5793	19.5112	38.8114	14.4266	10.665	23.335	42.3096	30.8965	39.2852	18.2977	45.523	40.3267	37.656	47.8435	30.3325	31.4868	30.1274	41.731	24.8026	41.8472	44.8395	40.7113	43.767	41.1857	48.7992	28.45	42.9068	43.2931	44.9436	22.6093	37.1534	43.1031	36.4856	41.146	26.0327	38.3682	21.2771	25.7436	8.89203	13.32	35.37	43.237	36.3611	32.4611
PLA2G1B	35.1965	14.2511	20.01	4.02083	28.0307	31.2154	-4.73317	32.5372	-0.879556	0.049997	-0.645884	31.1075	6.64723	-0.241508	0.729419	0.0535996	10.3989	27.7294	16.8991	6.18426	-0.774283	8.76473	9.10964	8.53284	10.1759	36.0528	17.8711	21.4228	2.22919	24.9349	5.52998	20.7815	15.779	15.6518	0.279966	10.5608	28.0929	-1.63035	7.38985	6.47284	11.7475	1.93745	2.75695	-2.22831	-1.59713	30.7666	2.26621	11.1215	13.6939
B4GALT2	9.34595	11.9926	12.4712	11.8184	11.8788	10.5737	15.7865	6.50943	14.557	11.1755	7.99108	8.2497	12.4347	14.1465	9.50986	9.7369	10.7292	6.07671	12.4712	16.929	10.8934	10.488	11.0955	13.434	11.5614	7.59225	9.63033	11.3769	16.7436	13.1168	14.4228	14.4757	4.0912	8.54324	13.7667	8.32441	7.25285	9.60019	14.3783	12.3936	7.49534	14.1311	12.2128	12.787	8.25225	5.78988	13.6678	10.5146	10.7351
HPGDS	6.05039	4.25664	3.94866	4.25553	2.14687	5.97354	1.36674	5.9887	0.287666	1.42291	4.34599	6.14715	2.84189	0.580496	2.18735	2.12958	2.94267	4.93736	5.461	1.19059	5.52763	4.19737	5.98388	2.51504	2.81794	6.14975	5.0382	3.9599	0.609432	4.32559	4.77827	3.99297	4.03613	6.5191	2.36899	3.76136	3.62226	1.69381	1.03923	4.47684	6.54171	3.34045	1.79092	1.83028	0.948063	4.64522	2.63099	6.61073	1.36497
EPHX2	4.58258	1.85526	2.29526	2.2629	4.07895	3.74796	4.56598	4.28837	4.40286	2.50164	1.93105	4.40416	2.93733	0.716619	3.51367	1.97581	1.50587	3.63892	4.2585	1.35268	2.27452	2.6759	2.31375	3.6558	3.58433	4.75606	1.96325	2.9564	2.07512	3.94186	2.52924	4.82567	3.82512	4.06749	1.15775	2.50089	3.90719	1.19715	2.02332	2.81348	2.95663	1.70765	2.0936	1.74685	3.91457	2.30424	1.32495	4.25587	3.53495
KMO	2.21131	1.34681	1.21415	1.8954	0.579839	2.15511	0.862748	2.78591	0.418927	0.29917	0.879641	1.97896	1.44611	1.04201	1.25977	2.64995	2.06455	2.90541	2.05007	1.76365	1.51692	1.35987	2.98226	1.05819	2.35301	2.13508	2.62639	1.66923	0.997354	1.57695	1.91187	1.20125	1.19803	1.86907	1.21547	3.06315	2.02882	2.73525	2.78129	2.15243	2.09151	1.24626	1.42383	0.394132	0.780284	2.35028	2.60377	2.19502	2.24327
IMPA1	2.15117	4.922	3.20975	5.54198	5.11485	2.25243	8.11366	4.39938	4.92173	5.14232	6.22734	3.97187	5.14467	6.48187	7.15292	7.29759	5.87484	4.16651	3.97561	4.99262	6.38498	5.22444	5.94505	4.85019	3.99449	4.15176	4.94615	6.783	5.41703	0.966629	5.50587	2.37093	3.40585	2.18722	6.33025	6.44424	5.48459	5.84075	3.47453	3.54574	5.04994	3.79183	6.32245	3.46428	4.7465	5.7233	5.37156	3.68454	3.973
ADCY6	7.73811	5.92076	5.68928	3.76824	7.23177	8.66414	3.22399	6.64131	2.54037	3.24539	4.61495	6.16517	4.53162	4.98454	-0.508934	7.54165	0.183584	7.14456	7.59876	2.41101	7.04223	3.89635	7.30434	4.07812	7.4788	8.38834	5.21462	6.61466	6.2322	4.26609	4.44712	6.49185	7.43986	7.91689	4.23229	5.25297	7.28395	5.39869	4.40424	3.04029	6.93298	5.77021	4.82691	3.34265	3.20452	5.21881	6.24696	6.61165	4.32964
AOC1	-1.19578	10.6978	1.09772	2.35178	24.6551	2.34769	-1.44728	-2.396	-3.69686	-0.589943	5.68332	4.7479	4.56559	-1.34712	-4.36814	0.966854	-1.78744	-3.86573	3.10808	2.2197	29.2931	2.19178	16.2539	-0.235243	23.4697	9.11774	-0.302186	29.3563	25.4262	31.0317	3.35942	26.9855	-0.139924	11.1748	-0.55172	11.5473	23.6508	28.365	3.87079	0.561735	24.5115	-0.176663	-2.28412	6.04538	-1.64134	7.39842	-1.2092	17.195	0.740719
GAD1	0.488418	2.31563	0.759295	1.36965	0.605109	0.626872	1.58219	0.367314	0.943433	0.624551	0.524153	1.82017	1.46769	0.925293	0.343227	0.818601	1.9352	0.260626	0.462931	0.550627	0.617057	1.93619	0.835693	1.55469	0.578202	0.473282	0.588798	0.384771	1.69255	0.600353	0.802289	0.418896	0.784484	0.800926	1.28169	0.515768	0.452882	2.63792	0.550052	1.13708	0.541182	1.26808	2.14079	1.27505	0.583119	1.82367	1.24279	0.677789	0.4342
NANP	2.73511	3.63601	2.70622	2.26693	1.40151	2.58562	4.65868	1.33686	3.62285	2.64566	3.64119	2.4409	3.10792	0.343697	3.30918	3.27511	3.10862	1.84899	2.26745	2.49528	2.55471	2.96221	2.78719	3.24769	2.40058	1.54151	2.81052	2.58627	2.13934	2.01229	2.94712	2.16792	1.33006	1.85854	1.31918	3.14778	2.47734	3.72199	3.93136	3.92566	1.20962	1.80365	3.44984	3.09721	3.69427	2.76487	3.29572	2.39192	3.26826
PLCG2	2.76752	1.69267	1.18603	4.76592	1.67767	2.59538	1.51072	3.23748	2.88358	1.78983	2.34886	2.45028	3.82268	1.74895	2.54274	3.32555	3.82364	3.54571	2.62386	2.4638	3.05798	2.46974	2.44561	1.97632	2.57867	4.02503	3.95444	2.13795	1.0417	2.22392	3.41179	2.22171	1.9704	3.46954	2.12192	3.84862	3.16194	1.73007	3.10782	2.21044	2.12371	2.04342	3.12493	1.43506	2.05292	2.58593	3.28905	4.08825	4.8001
GNPAT	15.4787	13.9111	15.3303	14.7951	18.059	15.1316	15.7108	13.4873	16.1421	12.8577	15.1016	18.0402	15.6961	16.1914	15.8128	16.3234	14.1367	13.5852	17.1671	11.8137	12.6822	9.92029	15.8967	15.9866	13.4947	14.0456	14.497	14.92	10.0588	15.4662	15.5269	14.9832	16.5369	13.6012	14.6965	14.8557	15.9816	16.1256	17.2535	13.2755	14.2775	11.8706	13.0941	15.8886	13.5983	13.1915	15.8293	12.7437	15.8065
ALOX15	-0.0506911	-1.00188	0.745182	3.6574	1.77741	-1.33869	14.2658	3.74273	-0.888511	-0.0852428	22.2213	1.3826	17.0258	0.935353	-0.690762	2.59709	2.66991	4.41555	-0.810269	5.03322	-2.18274	1.75233	-0.610024	5.13828	26.7451	2.80547	-3.62667	1.7181	4.58184	-0.264159	-1.01092	-2.03879	-2.14838	-0.686725	1.96735	-1.07017	-2.01156	10.805	0.106578	1.43947	-0.120338	-1.17825	0.272905	0.906663	14.7207	18.6457	1.67359	1.78688	30.1958
DGKH	0.58795	2.22007	0.872322	2.2937	-0.59833	1.34009	5.7062	1.80162	1.45196	1.41689	2.14325	0.44438	0.983284	1.02989	3.92254	-0.345223	1.94472	2.61887	1.51205	3.00689	1.39097	1.27422	0.0816666	2.06829	1.84679	0.851074	1.08577	1.23453	1.797	2.75954	2.5079	1.38924	1.09734	2.42544	6.46317	0.265137	-0.70489	2.61521	-0.722318	1.88344	2.17865	5.24719	2.15355	6.18222	2.69254	2.96541	1.55777	1.00564	-0.3429
EARS2	5.16804	3.51778	6.4508	3.58308	6.75726	5.37611	3.85949	1.07405	5.20402	7.65698	6.96474	5.57338	4.2709	4.38769	5.39139	4.38022	8.00054	2.53277	3.78473	4.59852	2.13936	4.10449	4.03789	3.40053	6.13043	4.68989	3.52363	5.56352	4.0523	6.3394	4.1387	5.80583	3.76973	3.84093	3.87976	4.34361	6.82441	5.29611	3.39561	3.6421	4.38529	3.65575	5.32845	6.04279	5.72933	2.68808	2.76481	2.82848	5.1334
DEGS1	20.2027	21.8632	21.4032	21.5647	21.7113	21.6539	20.5663	21.5931	27.5171	29.3185	26.6759	24.113	21.5371	29.987	24.1497	24.2623	21.2258	22.3084	21.8383	25.0335	21.6816	21.8191	22.2388	25.0655	19.2208	18.8293	24.339	22.7289	18.9924	21.2355	22.9826	20.097	22.4834	19.2673	20.3867	24.0377	24.6542	23.9139	21.6302	23.0463	20.541	21.0914	20.7255	26.6884	26.4454	20.5804	23.3453	21.1137	22.4437
ACADSB	9.85445	1.44754	6.07205	6.17238	18.8923	9.80612	6.13065	7.17595	0.687384	2.49773	3.64212	12.3631	6.40328	4.08964	3.01287	1.28276	4.88718	6.77211	7.94224	6.97171	3.66806	5.27976	5.01672	5.83424	4.81856	9.19488	6.41005	4.51066	-0.46739	5.31907	2.17677	12.1678	6.87431	8.6729	1.37496	6.05052	12.4486	3.67793	6.92427	3.84253	6.18027	3.80666	2.92881	3.41123	5.42914	5.77472	3.28123	4.73492	5.2841
EPRS	23.5627	20.5058	22.829	19.4529	29.406	20.2429	24.0611	17.5116	24.4805	19.7778	22.2279	25.6946	19.3508	24.4418	25.146	21.8393	19.2625	16.444	21.0898	21.2151	18.595	19.5512	21.6171	25.1534	22.849	18.0538	22.233	21.0372	20.2901	21.4986	17.6305	21.667	26.3879	19.3209	23.7207	22.4365	24.5693	24.0741	24.5244	24.2859	19.6762	22.1348	17.1865	23.8008	24.7409	19.6627	20.5712	16.9331	24.2234
METTL6	1.73287	2.19174	1.65407	1.29634	1.27683	1.532	2.56973	1.52761	2.06279	2.58964	2.14567	1.86078	1.79489	2.01088	2.23277	2.40969	1.94523	1.69517	1.99037	1.81765	1.49392	1.89543	2.21461	1.9455	1.77379	1.65305	1.78805	1.6869	1.08798	1.52584	1.98644	1.87352	1.73457	1.39443	2.01254	1.89628	1.3365	2.18466	2.02856	2.01889	1.85599	2.18447	2.1661	1.76645	2.37418	1.74268	1.95781	1.74045	2.46825
PRPS1L1	0.733312	0.791583	0.745228	0.803842	0.770381	0.862088	0.848382	0.743655	0.798728	0.811047	0.816899	0.711622	0.746826	0.861363	0.779997	0.755336	0.824918	0.78632	0.763819	0.777355	0.78035	0.770133	0.780451	0.768731	0.757501	0.730579	0.767957	0.742406	0.769883	0.769231	0.756245	0.768619	0.776934	0.781564	0.802164	0.746936	0.767123	0.776548	0.796958	0.790042	0.770355	0.801756	0.790575	0.809914	0.79581	0.780063	0.760099	0.799581	0.743787
PLA2G5	1.39305	1.6916	1.28862	1.95714	1.49632	1.45043	0.565493	2.48707	1.22132	0.743678	1.28211	1.21963	1.42311	1.66124	1.42329	1.81132	2.06914	1.91483	2.45922	1.42017	1.57629	1.56516	1.70332	1.49107	1.86886	1.70713	2.86618	1.60676	1.11285	1.79048	2.5754	1.26852	0.870509	1.69673	1.32227	1.62545	1.63813	0.932618	1.48571	2.05962	1.08281	1.11974	1.74148	0.887712	0.901868	2.1087	1.28022	2.38708	2.0655
AGPS	5.86479	8.75706	7.35341	5.62319	1.74368	5.82957	6.02876	5.69371	14.1521	6.95106	7.02352	6.79704	6.59969	7.34668	6.40019	7.38939	5.10489	6.12423	6.45907	5.53342	5.82902	5.85452	7.28539	6.88619	5.78998	3.82	7.66933	6.94559	6.82736	6.61513	6.48461	5.443	3.0308	5.57557	5.9147	6.67932	5.97609	8.39293	6.87379	7.97702	6.19692	6.26745	6.49593	6.47969	8.19883	5.02519	4.72264	5.01453	6.61864
PCYT1B	0.564612	0.716765	0.669668	0.913892	0.873957	0.560434	1.08696	0.758437	0.729493	0.939525	1.82878	0.700663	1.40487	0.792043	2.23542	0.827411	0.772532	0.702028	0.673106	0.818703	0.904694	0.858697	0.692147	1.10489	0.777358	0.81425	0.740795	0.59772	0.85758	0.738952	0.959744	0.773709	0.821723	0.64626	0.89881	0.851147	0.70854	0.596035	0.952902	1.68347	0.723143	0.973224	0.654018	1.42898	1.28176	0.763999	0.854544	0.662488	0.799851
ACMSD	0.704359	1.16006	2.31183	0.382053	1.35543	0.734176	-0.404185	-0.112007	0.508623	0.699231	0.427718	3.81252	0.506363	0.651333	0.965825	0.602508	1.00731	0.498975	1.20896	0.376376	0.281554	0.426545	2.34836	0.51657	0.427389	0.529797	0.46397	4.64714	2.34307	5.90733	0.446602	4.0714	6.07857	0.509986	0.644822	0.60762	8.48786	0.756876	1.19297	0.156607	0.442383	-0.147861	0.615262	1.05972	0.780753	0.635278	0.64425	0.708803	0.205638
MBOAT2	7.02902	12.9864	5.3525	5.47801	4.15968	6.01214	12.5163	5.25709	10.9756	11.9333	7.89172	7.50524	7.76205	11.4569	5.10443	-2.14747	1.95783	4.47513	8.02719	5.84239	14.5485	10.988	4.38469	4.34071	5.482	3.67147	3.11324	6.72994	8.96058	3.95759	6.11137	7.53143	4.74378	3.32778	13.5402	9.62703	7.86372	7.25626	6.70547	10.9685	13.4563	8.32858	3.89233	11.0155	10.2359	6.16078	1.71569	5.76153	4.15139
ENTPD1	4.86228	4.66785	3.33106	6.62945	-0.0063824	5.42208	2.42239	4.62898	1.52175	3.43555	3.76802	4.94125	5.22625	2.24399	4.29032	5.39806	5.79744	4.51822	5.54762	4.22694	5.06481	5.23385	5.18565	4.05578	5.79625	4.83667	7.28802	5.43393	2.81916	6.07643	6.93669	3.85664	1.93066	4.80903	3.54131	6.96602	4.0176	4.28937	4.14996	5.24844	4.41158	3.98757	5.18183	2.58403	3.49751	3.35708	2.86171	3.13141	5.99517
POLR1A	3.33303	5.97656	4.30592	3.23628	3.66756	2.41201	4.06813	1.05918	5.32376	5.37411	4.08595	3.02462	2.74779	6.59109	6.71422	4.35217	3.78042	1.90878	3.29329	5.36128	1.99708	4.53726	4.32372	6.26813	4.50829	2.47478	3.07775	3.60854	5.66894	4.31642	3.90154	3.68492	3.15688	3.37918	4.60421	3.25066	5.77586	4.67144	5.18249	5.05326	3.84501	5.20949	4.74184	5.62264	6.17558	3.19922	3.39782	3.14562	2.54798
GSR	27.0125	23.7855	19.7528	27.2408	25.064	20.579	31.5082	19.0406	24.4722	23.7763	33.5306	29.5362	33.2305	24.0765	33.7687	31.8745	26.887	24.0804	29.986	28.2605	18.7718	25.9849	22.1798	30.2386	32.8724	26.5706	23.6232	27.8225	30.4197	23.5897	23.5675	33.738	33.1125	22.9834	31.8418	25.6999	35.9324	33.1572	22.737	27.4406	26.1955	23.3466	31.5016	34.9493	33.0906	24.2711	24.1269	23.8081	27.2019
ENOPH1	15.6311	15.4396	16.1136	14.0396	13.262	12.8925	18.3877	12.4828	18.267	18.4192	14.562	15.32	15.0994	17.3622	17.7076	18.3573	18.5696	11.7799	11.5862	19.1845	14.9193	17.8905	15.3503	21.284	18.6295	12.5083	15.4074	14.7189	16.6282	16.3284	14.8862	15.3659	11.4544	12.9429	14.064	17.947	15.9275	14.7772	16.3529	17.9904	14.2172	18.5262	16.2861	23.2507	19.9061	14.5474	20.0003	16.1748	13.4288
UROS	3.5288	5.65469	4.73252	4.83034	5.53085	3.10506	4.72328	2.81201	4.27252	5.6308	3.03348	5.44536	5.41528	6.85299	7.66967	6.02845	6.15319	2.59031	4.84732	5.39853	4.39165	5.80039	5.35233	3.53547	6.22878	3.11074	5.06785	4.44611	4.15376	4.51233	6.30302	6.83292	5.40454	2.07802	5.64383	5.34444	5.57112	3.47016	5.00341	4.10225	4.86869	5.26896	3.61503	6.43275	4.5086	2.06867	6.27695	4.74875	5.1205
ALDH1A1	31.8039	35.1102	18.7573	43.5256	33.8468	33.027	43.2703	40.4659	-7.06978	35.8268	28.5043	32.5633	27.687	14.2148	44.383	47.595	26.7002	40.3698	29.9592	40.1277	18.2948	42.5086	31.7868	40.1907	40.8217	41.5084	39.6205	32.5913	30.861	35.6156	19.889	30.2985	30.0443	27.3295	35.4251	37.29	34.5796	44.2183	39.6076	42.1797	26.7375	32.7248	24.7308	44.1098	45.8429	42.7949	15.8261	36.0246	33.1342
PDE7B	1.47309	1.23432	0.797749	2.42098	2.13928	1.68295	1.0575	1.65251	1.39432	1.52355	1.15037	1.56154	2.43113	1.10463	0.262291	0.808828	1.64307	2.19672	1.81571	1.55757	1.33238	1.5257	1.45659	2.57754	1.68174	1.81035	1.79704	1.39035	2.31197	1.29784	1.98218	1.34305	1.28326	2.7113	0.95286	1.4808	1.51728	0.657375	1.82746	1.57275	0.981139	0.779158	1.94496	0.992203	1.1574	1.49859	1.59412	1.9653	2.45917
SULT1A1	5.68681	3.30138	3.31177	3.60755	5.4184	5.54052	1.5805	6.40055	0.823891	1.38503	1.94556	3.63616	3.29358	2.96717	-0.503648	3.55545	4.01002	6.53674	4.41346	3.25898	2.19548	2.42846	2.871	3.52371	3.19531	4.81021	2.86367	6.02503	6.89017	5.5085	2.55153	6.48115	6.22702	5.07293	3.40818	4.74141	5.57695	4.4454	1.19574	3.50255	4.88062	1.42615	1.73849	2.01581	1.64902	5.00377	0.720766	4.80445	2.90588
ADH7	-3.25628	-1.65472	-1.5901	8.19581	-0.645116	-2.66026	13.9677	-2.06025	6.96691	11.3191	13.0256	0.614288	2.48574	-0.562568	10.6629	8.12689	-1.97454	-1.63656	-2.25742	9.38556	-1.25807	12.013	-1.88066	11.0061	-1.11191	-1.58523	-2.14238	-1.42986	2.24097	-2.45907	3.51794	-1.48213	-1.37517	-2.10897	9.75252	-2.28639	-0.889755	7.25041	-2.34464	13.9543	-1.78861	10.3705	5.53608	12.0748	12.4415	8.03317	-2.41486	-0.703227	-2.4929
AGXT	0.445144	0.71203	0.984097	0.814388	1.43877	0.586976	0.356757	0.319509	1.05989	1.0072	0.995718	0.67611	0.953631	0.635564	1.0991	0.831123	0.848388	0.745707	0.609469	0.832192	0.852571	0.834366	0.942877	0.860511	1.14041	0.733849	0.987309	0.707967	0.85771	0.887454	0.639098	0.840669	0.859755	0.472958	0.385373	0.976746	0.911967	0.781137	1.28669	0.87551	0.604015	0.458494	0.61334	0.924626	0.874712	0.729657	0.824141	1.12061	1.10337
IDH2	38.7629	33.5844	38.8747	37.1011	36.4954	33.1122	27.5314	30.6529	34.6831	32.1425	33.513	35.5557	40.2027	34.0904	36.4468	33.8738	34.269	30.1779	34.2776	38.3762	30.4209	36.9637	33.1393	36.0354	35.3731	33.8509	38.3785	35.9149	38.1894	35.0439	37.6158	38.4403	33.0832	31.846	38.4268	37.4554	35.4062	39.6932	42.2318	33.0055	32.5433	31.4169	35.4876	35.5877	38.6071	31.9674	34.5642	35.6535	39.1928
LDHC	0.897583	2.34085	1.54261	1.09292	0.825432	1.28972	1.00142	0.121344	1.45551	1.25948	0.975051	1.01902	1.83554	2.03521	1.47529	0.684429	1.05571	0.414606	0.588463	1.37355	1.0925	1.07532	1.00435	1.24707	1.25168	0.566154	1.13809	1.21148	1.55513	0.906713	1.12959	1.79584	1.43225	0.782366	0.652279	1.08688	1.08207	2.08039	2.43819	2.16802	1.35319	2.06161	1.60762	1.81507	0.629765	1.12023	1.10103	0.987869	1.88765
PTGS2	21.4107	41.3166	16.9711	30.9851	4.62224	30.2265	27.6334	35.2352	46.8307	29.0728	14.7181	26.1261	23.347	19.9928	14.0332	-0.68551	26.2562	24.1902	29.4637	24.1035	23.7153	20.5057	37.8714	24.8886	24.4213	14.3207	30.2922	26.6189	39.9023	22.9435	31.0668	22.4233	23.8976	24.1239	20.9921	21.3853	21.0035	24.4391	13.078	13.313	25.4042	21.193	34.4184	11.0701	11.3646	19.8199	5.47936	15.3458	24.8585
PDE4D	1.89995	3.08179	3.08132	2.96928	11.08	3.08288	2.27305	6.17779	0.418358	0.941643	4.85325	4.098	2.0239	1.55667	3.86965	1.10176	3.52516	3.09523	8.53082	3.14979	4.59391	1.9455	1.1271	1.81602	4.27366	3.26084	3.8993	5.66392	7.61102	8.83281	3.09732	10.6512	9.07424	5.13753	2.67033	2.46986	9.51511	1.31922	5.41757	3.78596	5.07331	4.1966	2.93773	2.98478	2.05423	3.31078	-0.497122	1.74732	5.62768
AGK	3.6598	3.93057	4.44368	3.31548	4.48016	3.19688	2.02067	1.85949	5.27771	2.49239	4.73336	3.93827	4.87407	3.97212	6.1209	4.91128	4.64461	0.98479	2.48114	4.12461	2.50051	4.00747	4.57381	6.36423	2.9093	3.24271	3.45711	3.62202	4.45357	2.77461	4.2604	3.54123	2.40752	3.7061	3.80813	4.58246	1.67462	3.99131	3.64698	5.47461	2.31896	3.69167	4.19488	2.01137	7.07706	3.08841	6.64246	2.73575	3.65937
NEU2	0.848895	0.846336	0.889439	0.904352	0.903305	0.820205	0.833877	0.823913	0.866225	0.91372	0.821735	0.838258	0.890727	0.843121	0.872886	0.854758	0.876181	0.823911	0.892207	0.841525	0.855794	0.896622	0.846442	0.926745	0.853637	0.772418	0.840099	0.835917	0.918679	0.832821	0.836267	0.891776	0.908385	0.882565	0.821546	0.868565	0.855671	0.864535	0.877069	0.86029	0.847427	0.831151	0.843204	0.88637	0.93462	0.835178	0.816566	0.881527	0.921293
UGDH	27.8019	24.9442	32.4166	30.3555	42.1744	27.0065	32.2057	24.4873	28.9185	29.0115	28.7852	34.2549	26.9092	21.0102	36.0974	42.3184	26.7913	22.4758	34.5074	32.0801	29.6803	28.0511	32.3423	30.071	33.1714	28.6737	26.7432	35.5898	30.1268	30.1522	27.5116	39.8346	37.8388	25.465	29.7694	26.7339	40.9181	32.3858	25.6492	32.4414	29.6983	33.9615	26.5519	28.2753	34.948	30.1797	30.8728	27.0863	28.329
OCRL	10.3837	7.77395	5.7474	3.99774	6.96511	6.49617	4.63204	4.43963	7.05433	5.78756	8.01795	5.46719	5.87681	5.0059	8.28226	10.2315	4.65121	3.23386	5.00235	5.99926	4.45599	5.23036	6.2782	7.81545	5.68402	4.33358	4.72373	5.66402	6.1288	6.31954	4.51236	5.20355	8.62056	8.52729	5.95827	5.84224	7.92489	8.59815	7.56827	5.56869	8.57985	9.09272	5.63502	7.68806	7.6894	5.12912	9.43352	7.79888	5.46822
PHGDH	-1.89046	-3.30949	7.36725	4.77569	1.46646	-2.21745	10.1599	2.17191	0.811886	4.95053	6.27124	-1.88629	8.45596	4.45186	9.36265	-2.97593	-1.32967	1.57193	-3.22344	9.80321	0.395326	6.18865	-1.32266	10.4833	3.99537	-1.2524	7.52452	0.938179	7.85174	-3.67901	3.5725	-2.47716	4.31229	-2.71826	8.5278	1.15082	6.29643	5.62376	8.77629	9.68864	-2.21532	1.76402	7.70533	6.34656	8.56558	4.99142	-2.28944	-0.604374	5.55693
RENBP	6.98872	4.01436	11.294	7.34575	7.66507	7.86377	-0.875941	6.10168	1.54797	1.36225	3.5604	8.09473	9.46458	8.56375	6.51035	8.28621	8.73615	9.31299	5.00968	6.48443	10.674	2.66528	8.69784	12.7975	16.4234	4.40059	10.4705	6.98966	9.80168	8.1397	8.54579	6.54294	14.621	6.5001	6.09557	11.3543	9.38253	13.2091	5.9231	6.08034	10.9061	7.2466	7.96859	3.37453	11.2802	10.9797	10.8234	8.80551	5.13724
PDHA1	11.3498	10.2616	7.82519	8.75928	8.75068	10.1805	14.128	8.96651	10.0673	11.1805	10.6029	9.00399	9.78438	11.3249	11.0682	8.50749	7.22615	7.9625	7.7116	9.46799	6.84771	8.36452	7.95553	10.4125	9.59341	8.19684	8.43108	8.11827	8.02232	9.19057	8.27785	9.57266	6.66602	7.61159	9.79723	8.74776	9.09236	10.4972	14.1078	8.05148	9.57255	6.3596	8.99716	10.4727	12.1812	8.98673	9.56884	8.4099	8.21922
ADSL	6.89222	8.49986	6.97242	6.15705	4.78187	3.81459	11.2737	5.27096	7.15349	6.50542	10.561	7.91051	12.4513	8.86635	10.7832	6.79535	7.83873	4.76052	5.76251	8.2338	5.60813	5.00409	4.99653	9.86551	6.58157	6.26954	8.58982	5.04343	4.2907	4.80756	8.32362	7.14462	7.50363	4.92292	6.48017	6.32184	7.2882	8.04153	9.48585	9.23847	5.43944	5.19389	10.8087	11.5232	8.96327	4.53612	0.607995	7.06063	9.18091
GPX5	0.757921	0.773461	0.797861	0.776227	0.881276	0.784237	0.803439	0.715914	0.780287	0.844619	0.72995	0.773193	0.840004	0.802953	0.807091	0.81612	0.731142	0.712439	0.783269	0.77749	0.773467	0.862654	0.797935	0.74923	0.776758	0.758801	0.693582	0.783121	0.855071	0.771421	0.760061	0.802578	0.809321	0.773285	0.737531	0.750685	0.796533	0.827818	0.75462	0.81055	0.78222	0.767991	0.827738	0.797247	0.769499	0.879926	0.838596	0.769937	0.837705
CAT	28.9485	26.729	25.4263	26.8384	27.3196	28.6742	24.2732	31.6434	23.0098	24.8984	23.238	28.2119	25.1603	19.3261	23.9064	26.0353	22.8583	33.5841	26.5401	23.2107	23.9337	22.4927	25.6036	27.4788	26.8498	30.149	24.9664	25.1094	22.1492	24.1618	24.1623	28.8301	32.5472	28.7919	23.5534	26.1638	28.6477	28.0066	27.5789	24.4739	26.9977	22.5164	23.6958	22.1971	22.8915	30.4235	18.7926	25.8666	23.2524
NME1	6.34797	15.0448	13.5996	12.3513	10.421	8.05842	15.0135	0.656378	14.7377	12.2969	14.9407	12.5137	14.5797	16.9256	17.0592	16.5478	15.3438	2.58924	8.9433	13.5636	9.74973	13.0411	15.2584	15.0433	14.2365	4.73464	11.3624	9.68669	13.9672	8.16831	12.4044	14.9932	3.54633	7.0468	13.765	14.3793	10.1296	16.2519	16.3501	13.625	9.34687	13.2346	10.735	16.1621	16.2409	6.19194	10.8218	13.005	13.3967
UXS1	11.0678	9.36312	12.665	8.01613	13.8231	10.5512	10.3543	10.7188	7.28815	5.94231	7.62852	8.90973	5.62391	7.11925	10.9849	11.3022	7.62379	10.2654	9.49084	8.24729	10.9965	8.20022	10.0534	8.17832	6.63478	11.3621	8.02743	8.35084	11.4954	8.39469	7.96805	9.24893	8.78089	5.9214	6.91965	6.75268	8.64407	12.0073	6.67275	8.1188	8.31362	9.34805	7.91781	9.63433	11.2652	8.68729	13.3453	7.92315	7.39918
PLCB4	0.91984	0.402762	1.47776	2.40558	0.365769	1.07649	0.70644	2.528	-0.508864	0.441245	2.24398	0.470447	-0.229353	0.106358	4.00624	-0.653865	0.468559	2.19399	2.91483	1.49159	1.28115	0.655273	0.941051	1.61272	1.66747	2.12973	1.27706	1.43955	2.19323	0.158076	0.420305	0.190999	0.167136	0.610848	0.290642	1.20661	2.7279	3.64072	0.0500358	2.60321	0.0606978	2.01618	1.84841	3.46293	2.94652	2.905	1.20969	1.02157	0.271673
POLR2E	14.0574	16.4565	14.0446	14.2934	13.9763	13.9208	18.8937	15.6673	17.3833	17.0458	17.3889	16.8355	20.2089	15.4862	18.5663	19.1906	13.9783	15.5152	13.3346	16.674	18.2331	17.1922	22.3119	18.7431	18.6621	15.601	16.6081	15.6253	15.3396	16.7397	16.5769	16.4317	16.7357	14.2285	15.119	18.7577	14.8684	17.1244	17.502	16.1193	15.8259	16.1972	16.7012	15.7162	18.4182	12.4012	10.8779	16.4866	16.6101
SAT1	146.685	147.091	141.487	145	142.477	147.942	147.92	146.25	142.518	145.563	145.528	145.434	145.232	142.132	144.172	144.202	144.963	145.456	146.642	144.811	145.036	149.961	143.691	145.712	149.052	144.714	145.732	145.372	145.491	145.44	145.487	143.812	144.065	144.838	147.465	146.395	145.238	144.961	144.122	144.994	148.524	145.523	144.113	144.221	145.824	145.692	145.787	146.874	145.641
GATM	4.88553	1.49753	3.52475	1.87069	0.029556	1.52449	5.42647	1.87424	1.8349	4.67695	5.2577	3.76646	-0.0864315	-0.939342	1.29813	4.32386	1.92749	1.87444	1.56133	-0.264963	8.1984	8.50158	3.66798	-0.909886	8.24847	6.18226	5.02283	5.24021	7.45878	3.0632	0.116303	1.04971	4.21333	5.07286	2.86113	2.91903	0.775051	1.4199	3.00207	2.56466	1.40397	3.27418	0.540425	-2.47065	8.81641	2.22113	1.28754	4.4498	1.93515
UGT2B4	2.11679	3.52223	-0.342949	-0.589729	-2.2902	3.33974	-1.01444	5.00732	-1.11488	-1.26839	-0.661242	1.40034	0.0541356	-0.117421	-1.2164	0.231293	2.21696	4.80883	3.00885	-0.0358703	-1.01662	-0.150709	1.39431	0.354027	-0.254821	6.38085	2.46637	4.44866	29.6567	18.6052	0.895415	-0.246467	-2.05239	-0.72057	0.735126	1.04943	22.235	-0.833492	4.57524	-0.193063	-0.455056	-0.688783	0.920623	-1.62282	-0.00195549	7.43214	0.0197483	6.59178	0.0432007
POLR2A	17.5103	18.042	20.3222	20.1066	19.4721	17.431	18.024	19.9714	19.9885	19.5072	18.5743	17.4881	18.7548	17.7461	18.5385	17.9875	18.0206	19.3334	20.8112	20.0134	18.1621	18.2228	19.4135	20.6156	18.5036	19.6225	17.5625	20.4859	20.3486	18.6761	19.8842	18.537	19.7599	19.035	19.6952	18.2992	18.344	18.2518	20.6812	17.8257	18.6488	20.1079	23.3684	20.9344	20.6105	21.9945	20.3802	17.1801	20.8839
CYP3A43	0.83326	0.77934	0.808707	0.830818	0.871244	0.842293	0.845238	0.796407	0.832024	0.82461	0.786132	0.837495	0.776599	0.797094	0.80185	0.810337	0.779531	0.806513	0.765168	0.779915	0.825191	0.834349	0.783659	0.855749	0.790777	0.807322	0.7544	0.803614	0.883062	0.796667	0.78211	0.812988	0.785095	0.764764	0.818507	0.83571	0.83448	0.825873	0.771098	0.799358	0.777397	0.809629	0.802996	0.829708	0.850513	0.839468	0.820697	0.846595	0.780658
PI4KA	8.04875	4.89368	5.19748	2.88246	3.95272	6.38925	6.2742	7.66721	2.05665	1.63964	7.48831	3.613	7.61294	3.26916	2.35893	7.84316	5.44979	6.85534	5.10748	5.66616	3.9714	3.5532	4.83393	5.45415	6.0158	7.09802	6.24953	3.25439	1.85611	4.91015	4.0649	3.87464	7.56461	5.91401	6.21216	5.27046	5.04653	4.72893	2.72346	6.71833	6.30502	5.70003	4.67349	7.8715	9.3409	6.18083	6.37751	4.29438	5.57476
SCLY	0.940852	1.17103	1.22532	0.977116	1.07552	0.966055	1.27382	0.943324	0.996536	0.963433	1.10612	1.12734	1.26681	0.980886	1.25619	1.1899	0.963842	0.823163	0.959384	0.917124	1.06102	1.13855	1.04747	0.985018	1.17819	0.94902	0.980275	0.966245	1.08006	1.22645	1.16812	1.18077	1.09366	0.900951	0.968949	0.974033	1.2298	1.17307	1.4125	0.993454	0.995288	1.05723	1.04946	1.15878	1.11054	1.03868	1.1863	1.06101	1.09763
PLD1	1.81912	1.16348	1.72572	2.098	1.14512	1.46125	3.21575	1.67338	3.28767	3.70816	2.70173	0.941926	1.46878	2.51858	2.82616	2.48835	1.08308	1.73355	1.52567	3.11863	1.47425	3.07961	1.74193	2.74376	1.50656	1.42634	1.48091	1.76701	2.40533	1.29126	2.13266	1.08157	0.953376	1.61001	2.18449	1.3724	1.24905	2.57491	2.19765	2.9281	1.29642	3.97377	2.54915	3.92623	3.54605	1.75164	1.57271	1.29121	1.66796
NAT2	1.46639	0.78666	1.87723	0.949243	1.15882	1.08121	0.602425	0.919546	0.866668	1.11913	0.769679	0.959526	1.08439	0.758786	0.579269	0.632741	1.07603	0.697538	0.966932	1.00465	0.805354	1.04312	0.91104	0.877486	1.38773	0.895411	1.02263	1.09809	1.25504	1.31587	1.21344	1.10018	1.31414	0.763164	0.949018	1.21443	1.38737	0.767206	2.38761	0.965211	0.711951	0.743192	0.750479	0.766556	1.07155	1.39124	1.26796	1.20716	1.07695
PFAS	4.14814	3.91728	4.74334	2.09456	3.92495	2.41596	3.38702	2.7435	2.61392	4.00411	2.93145	5.82953	3.84625	2.90636	3.30518	4.03423	2.98405	2.20313	3.59989	2.96118	2.90949	1.8082	3.1758	4.26869	3.13944	3.52864	4.17403	4.65154	3.94113	3.25778	3.28484	3.62198	4.30589	3.35572	2.90768	1.53208	4.62779	4.5273	6.01285	2.58585	2.62357	2.55297	5.63834	2.62081	5.07672	1.95506	3.29753	2.33037	4.15511
GGCT	26.5306	22.299	26.9257	21.3271	20.9035	26.3877	24.0289	16.5196	26.2067	22.6131	24.3591	21.6799	26.1451	23.5686	29.533	24.2848	20.5303	16.6937	19.0196	26.561	21.1464	24.1243	25.8099	26.6683	19.6399	19.0064	24.4533	19.9534	22.4275	20.3522	22.0092	23.3924	21.4635	21.2452	28.441	22.6271	19.3193	21.851	22.9679	21.9441	22.6678	23.7639	19.5285	25.8839	28.5638	19.8912	24.0478	21.2098	21.7955
DGUOK	17.0344	21.0058	19.0198	18.1979	13.9902	14.7498	22.3512	16.164	19.4983	19.4588	20.6337	17.1333	18.7865	22.1111	24.7357	22.8451	19.7837	14.9897	16.7614	19.7744	14.4695	18.0351	18.1144	19.4572	17.5576	17.0507	17.6191	19.3164	19.3625	17.1162	17.9198	17.7305	13.8445	14.3742	20.4625	18.3845	17.8212	21.934	20.2824	20.8405	14.8217	16.0301	19.59	24.3419	21.8949	16.3685	17.9566	17.5278	18.2192
SGPL1	8.14055	12.8789	10.2438	10.3888	7.78685	7.47062	9.61421	5.11267	11.5439	13.6531	7.20437	7.40763	11.4196	11.7666	16.9284	17.0312	5.09596	3.53925	11.3872	9.88251	7.01449	11.3962	12.8421	10.6864	13.442	7.08537	12.3952	10.3174	12.1095	8.51071	11.0877	8.28909	4.65189	7.42967	11.5786	9.72397	10.411	10.1849	12.1841	10.4431	10.9723	11.1574	9.86041	13.9285	15.6006	7.74594	11.7692	8.31291	9.3783
ACSM1	1.09205	0.898557	1.07726	1.48612	1.66219	1.37273	0.94712	0.795107	1.49268	1.26866	1.1894	1.40771	0.765522	1.2493	0.556692	0.67753	0.919131	0.801786	0.764367	1.24093	1.30275	1.54186	1.00549	0.880369	0.724935	1.92487	0.668014	0.833992	1.0325	0.78676	1.39509	1.01376	1.80217	0.71706	1.13008	1.11754	1.39608	0.894716	0.819453	1.0358	1.14352	1.15671	1.38776	1.15493	0.213182	1.82938	1.18454	0.921273	1.3482
GRHPR	7.74229	7.9437	8.10854	6.7169	5.4559	5.29714	7.30462	8.01834	8.48702	5.63203	7.63234	9.0203	8.22447	8.77026	8.379	7.58892	8.33269	6.70295	8.74773	5.47082	8.56533	7.65372	5.57961	5.05467	6.18618	7.67862	6.03823	6.07836	5.51088	6.39884	7.06321	7.41593	7.4083	5.44424	5.29173	6.98932	6.46617	8.22522	8.22706	6.84234	8.30438	4.47914	8.28718	5.96937	7.93045	7.02525	5.95195	8.60184	6.61287
ENTPD3	4.56758	6.49855	7.34285	4.91219	9.17988	7.50508	7.66383	3.97628	1.05017	4.21323	4.55848	8.27095	4.71645	-0.0981094	6.58788	-0.52162	4.00725	1.34558	7.18056	5.86731	5.97215	2.61236	3.46876	6.93708	1.32649	11.2603	3.51467	2.89651	2.96985	2.1254	4.98343	6.38096	7.09432	9.85368	5.66718	2.90356	6.3745	0.963909	1.54158	7.49452	6.07828	8.16152	4.0056	9.8266	8.35466	4.29103	1.87725	4.96305	1.69279
PAFAH1B1	11.542	12.6236	9.89697	10.3563	12.0058	10.1701	10.7758	11.9758	10.7566	12.3698	10.6308	11.9179	10.0406	11.3919	11.6833	13.7693	8.92268	12.088	12.951	10.9117	9.47485	10.276	11.9039	13.0759	11.9813	12.4841	13.2804	14.0808	9.43414	10.4143	11.2029	12.9007	12.0061	12.2468	9.78858	11.8519	12.6912	11.4262	10.3292	11.6632	8.04248	10.435	15.1954	12.0705	16.3156	10.5866	7.82441	9.44906	10.2463
CA12	-0.0180417	-5.23071	3.98645	14.1827	4.74037	-3.15479	18.3817	2.33868	19.885	18.372	19.5732	5.38427	12.8532	9.85738	14.182	6.61798	11.0075	-0.911812	-0.226101	6.28721	0.539787	13.6487	7.72075	16.8658	12.2615	0.218345	4.47237	12.4808	14.783	8.79534	15.5567	3.35228	12.7856	7.50132	18.9591	1.39305	18.2931	-0.976352	7.78108	14.9779	-2.61444	15.0671	14.6642	17.6783	12.2934	6.31415	0.779093	-2.88619	10.3086
CEL	-5.91121	-5.33474	-3.95805	20.4146	-3.28138	-3.95941	11.6533	-3.06141	-5.17631	-1.75778	7.01881	-6.26009	-2.38079	-5.85345	2.56726	-4.38395	-6.0135	-2.32237	-5.046	11.1471	-5.17759	3.72111	-0.347838	3.6896	-4.28777	-4.06674	-6.08167	-6.61216	-1.4234	-5.84864	-2.6986	-5.8839	-6.06018	-2.24089	7.64467	-5.52306	13.0767	5.01596	-6.33334	17.0311	-5.72477	-2.85774	-2.28854	10.3568	9.17818	-0.543042	-2.40529	-4.75584	-7.3406
ALDH3B2	-0.205422	0.0433904	0.130487	2.95447	1.68678	-0.20788	15.2632	-0.608214	13.6168	17.0635	5.50441	2.87061	9.71383	3.09142	6.38729	7.48152	-3.33077	-0.794118	-0.244345	4.2108	3.09584	11.1185	0.0502438	10.6132	14.1952	-0.0558579	-0.979501	-0.846731	6.40913	-1.09238	5.85687	4.69293	-0.877127	-2.29664	6.91897	2.59118	3.33153	9.76336	-1.31455	4.012	8.94118	9.65792	0.348123	11.6067	14.479	2.75549	-1.07187	3.46268	0.98526
SRM	20.2984	21.5909	24.3515	25.1879	23.882	18.4243	20.8327	16.7531	25.7923	20.3777	18.6736	23.5564	24.5798	26.5243	24.87	25.4017	27.2242	17.0341	20.5255	20.7515	20.1979	22.1918	24.4792	24.939	23.836	17.8626	25.1596	20.4229	25.9338	22.5376	25.4602	23.9397	16.8066	17.7537	22.199	22.9924	17.9456	19.3934	27.3526	20.863	18.0028	21.4319	25.5069	20.6782	21.1659	18.1912	23.0279	21.0528	29.8788
DHRS9	6.96245	2.81619	-0.195165	9.86819	-0.538585	4.88906	9.57233	4.20083	10.0555	3.98691	5.55537	4.92912	3.57487	-1.99694	5.60699	-0.305749	10.2283	4.38003	2.39262	3.37514	2.12503	12.6612	5.99863	4.24108	14.1459	5.35872	4.16356	3.8167	1.30106	3.97933	7.1306	-0.776552	1.8966	4.46928	11.8438	14.8294	2.12016	13.3382	4.32754	8.76907	4.4073	5.97088	5.67314	5.68564	11.8022	9.76217	0.344467	8.30299	7.46057
DGKZ	2.57799	3.99325	3.63072	4.68611	1.67216	2.31907	5.52577	3.37906	4.01729	1.39346	4.82626	1.53666	3.56701	3.74031	3.40969	2.81378	5.11301	4.08882	4.17433	4.35188	4.87184	3.38234	3.32743	4.61577	5.4686	3.19129	3.90285	3.49258	6.80665	4.70471	4.45869	2.92604	3.72165	3.95888	2.88302	3.83486	3.5896	4.57819	5.96919	3.11575	3.56463	3.96029	4.59445	4.57879	2.6515	4.63705	3.89051	3.47057	3.77785
CHPT1	5.91246	2.70332	3.31127	5.40559	6.81441	7.87778	6.26881	7.86754	-3.41747	-1.27361	7.05088	4.91373	5.29389	1.87523	6.1459	4.38111	5.13632	11.9148	4.47255	7.87825	3.00571	7.94117	1.73375	3.91157	10.9126	9.29916	6.80723	7.39872	8.81622	9.94137	3.33014	4.32647	0.761379	6.38714	3.72048	5.99046	9.34361	2.70833	6.41824	5.12197	2.61779	4.65682	4.57327	2.1456	6.2545	8.77225	8.12251	7.8015	6.78651
SULT1E1	1.30589	1.00451	0.690253	0.573287	0.692492	1.00022	4.26341	0.877125	2.09712	4.61138	1.13615	0.685044	0.914557	0.699239	0.603106	0.85536	0.388867	0.752732	0.859858	2.08699	0.469275	2.27532	0.4604	5.19925	0.744624	0.516663	0.799926	1.52355	0.548718	0.746892	0.822049	0.581508	0.266672	0.582893	0.38631	0.73754	0.714825	4.13086	0.639752	0.879841	0.588088	3.41541	0.743771	1.07393	1.39276	1.61761	0.484805	0.738113	0.413635
CDA	7.1691	17.2771	4.69311	13.0433	13.3885	13.4201	8.55252	6.06913	21.1616	34.3617	10.5198	10.1056	11.9454	46.2408	2.23241	4.03472	13.2504	15.8617	29.878	3.57721	42.9712	5.22046	30.9721	5.89957	14.6266	6.77252	5.86643	26.4274	23.5559	33.4997	6.08974	27.3423	15.806	8.21798	7.1905	27.0925	13.3821	10.5491	1.60579	6.05098	26.0175	7.60004	4.96264	9.88781	17.2246	6.97059	4.6791	21.5375	10.0831
NPR1	8.15291	2.75322	6.82254	5.6535	6.15213	7.99006	2.58278	9.57573	3.59937	1.9471	0.447839	12.8948	2.86845	1.44316	-1.22284	1.14943	3.13574	8.18051	4.80452	2.62956	2.36438	1.45275	3.59494	2.96801	4.99295	7.03717	3.93933	3.63548	2.02907	5.86938	3.23414	4.2002	3.94454	4.95356	0.345585	2.56033	5.31748	1.64901	1.45711	2.1654	3.12485	0.435427	1.37672	2.05408	1.08797	9.51266	2.84578	1.63776	4.44431
GK2	0.712063	0.766535	0.818265	0.805123	0.779418	0.725431	0.80946	0.753292	0.876334	0.798604	0.83246	0.743458	0.77991	0.71606	0.76229	0.768793	0.726431	0.800395	0.71713	0.765208	0.80335	0.792794	0.777516	0.78223	0.716625	0.771789	0.754528	0.733987	0.764238	0.72261	0.806277	0.754236	0.752573	0.745088	0.815507	0.7649	0.743235	0.813066	0.754359	0.794526	0.778784	0.782578	0.728953	0.805965	0.779169	0.789095	0.754129	0.740663	0.715805
ACSL6	0.824134	0.811487	0.885418	0.883256	0.884274	0.854427	0.747636	0.805253	0.807328	0.797165	0.78381	0.846063	0.854754	0.85755	1.03031	0.834428	0.896476	0.733749	0.912018	0.797008	0.815563	0.856689	1.03912	0.785431	0.848432	0.821351	0.874181	0.809275	0.842632	0.785879	0.853547	0.829118	0.838567	0.898156	0.72349	0.882458	0.871514	0.858751	0.910989	0.822241	0.819919	0.786549	0.759508	1.06527	0.800954	0.86441	0.969734	0.917135	0.831769
CA1	1.44689	0.242634	1.11779	1.12222	1.88881	1.30858	0.470349	-0.222884	1.29779	0.914718	1.18175	-0.0561997	0.258673	1.47251	0.585737	0.41747	1.04186	0.0588754	0.976295	1.3298	0.714883	1.26063	1.2691	1.35689	0.759028	0.159851	0.615265	0.0475477	2.14629	1.08695	1.24913	1.38208	1.71025	-0.0186766	0.0403806	0.561811	0.455167	1.65724	0.335443	1.3569	0.656805	-0.10046	1.44205	1.57411	1.53916	0.516004	1.58162	0.433759	0.531198
APRT	37.0274	35.0407	39.968	35.8234	39.931	37.3479	42.1171	36.0479	41.3121	43.4422	33.725	40.4658	36.0662	42.4466	33.9375	36.3166	36.2285	35.2152	38.297	34.4635	38.3504	35.3479	37.9839	34.2058	35.0098	36.4163	37.0171	40.1678	37.9795	40.2925	34.9842	41.5591	32.8433	35.8132	36.2767	37.9244	39.2132	36.934	39.4828	36.4872	38.1987	39.0061	36.7722	42.3165	37.9927	34.0501	33.2026	37.757	35.5837
NNT	8.75773	4.88313	6.59298	5.79974	7.04321	6.58472	11.5307	5.33812	4.26156	6.6536	5.93575	6.18727	6.94036	7.96939	7.43419	6.25191	3.95574	4.88003	3.76371	5.12303	4.48684	5.49982	7.15992	10.2134	4.0391	4.77133	7.53782	8.63704	1.21903	4.09858	5.97821	5.62121	9.31799	6.11215	6.80794	6.58799	10.423	9.86307	5.32753	7.63865	8.29195	8.05311	7.80681	9.32055	7.78603	9.23714	5.77671	5.54123	5.1336
IMPDH1	15.5355	16.9372	16.9112	15.66	16.3727	15.22	12.4354	12.7372	18.6846	14.9423	16.9092	14.6713	21.38	20.8948	18.2947	16.2818	14.5886	12.8833	17.3142	12.9999	15.943	14.332	18.089	16.1864	11.18	13.3997	16.1994	15.157	20.4644	15.8467	18.2682	19.0052	10.6105	13.4843	17.2198	14.3326	11.7045	19.6604	12.3007	17.7981	14.1764	15.0092	17.3811	15.0244	18.2388	14.962	19.2217	12.8424	16.5697
NME7	3.27309	4.1937	3.86416	2.62165	4.14208	2.06552	2.79276	3.06122	1.76779	2.6878	3.52528	3.92364	2.7825	4.09739	2.8298	3.97336	1.79711	2.06175	3.82141	2.26693	2.59462	3.13895	2.04225	3.09566	3.3357	3.35552	3.20641	3.55645	2.80965	4.06537	3.22042	3.55049	3.23835	2.95235	0.117817	2.59293	3.30625	4.02402	3.90912	2.59576	1.94875	3.13259	1.98906	3.69605	2.66398	1.73089	2.23283	2.88564	3.32291
ACADM	8.02461	4.97309	11.7614	7.41425	8.82131	8.31878	8.26508	8.31562	6.79528	-0.441674	5.67675	11	8.23481	6.53034	6.5462	9.72649	7.54547	8.77702	8.77512	7.36029	7.87416	6.40701	6.96626	8.16524	8.22329	9.17905	8.21597	7.10032	8.45332	7.28367	7.87739	11.8787	8.84163	7.805	3.933	9.21527	10.6773	8.55465	9.95991	6.21931	7.1176	8.28678	6.22179	0.26657	3.56124	6.30679	6.02748	7.37344	10.915
TYMP	30.2675	33.2884	26.615	29.8733	24.9703	25.9848	40.1167	32.4337	35.388	30.571	33.1779	28.6937	31.4353	34.4218	27.812	33.1228	35.2241	35.3803	30.5484	27.8873	36.3048	32.6715	37.1722	29.5493	36.2757	29.8064	34.9785	35.8841	29.9133	31.21	34.7342	31.8598	32.5516	29.6674	36.2922	36.234	33.6657	27.4617	30.6613	28.6511	37.5797	37.491	31.7879	29.8263	30.4305	30.0527	34.4952	38.9912	39.6466
PIP5K1A	9.88981	9.87839	9.93207	9.30022	8.54933	8.57333	12.0649	2.08561	11.2522	10.0905	9.45222	14.3667	9.31834	9.28395	15.1988	16.3635	2.18475	8.73798	12.7395	6.37008	5.56601	9.78903	9.78885	11.4482	14.7545	7.24935	11.1843	11.5956	10.3712	6.21659	12.1426	14.0633	12.7449	13.0428	10.6523	14.6769	13.8861	10.4797	15.5132	6.90159	3.90534	15.2761	13.1861	13.6982	14.7702	2.51747	13.992	10.8761	14.2618
AKR1B10	11.3411	5.48297	9.7849	59.0352	33.1716	8.12851	64.4074	2.46152	48.6872	55.8221	59.8749	18.5466	43.3509	10.9987	66.6059	63.0681	10.0089	5.67239	42.8358	56.8051	21.6018	44.4022	13.4502	44.7658	37.1224	25.2192	2.67035	56.6074	58.9662	40.4347	46.9562	59.435	13.4659	8.99406	62.0546	5.58953	57.561	61.0705	7.46828	63.1797	23.4391	39.703	28.9072	57.0012	66.5222	36.6068	3.05738	24.8104	7.98934
PTDSS1	8.92815	6.57919	6.87919	12.7608	9.95263	7.62875	14.4388	7.63769	12.535	11.2831	14.2092	7.23941	12.0429	13.1248	17.6162	9.25106	9.29681	7.19782	5.55226	14.7195	8.24593	9.08911	8.51065	11.9451	7.7538	6.65337	9.21646	9.14383	7.76016	6.51217	9.39494	7.5994	4.84417	5.84232	11.563	9.00562	8.20762	6.91719	6.30704	14.7763	6.83173	10.6667	10.6209	13.1307	15.6187	8.8753	8.03772	5.7103	8.09379
DTYMK	5.09672	9.90584	10.3956	10.2562	5.87502	4.38463	12.4038	4.73164	6.80585	8.33096	11.3235	6.42761	10.3453	12.6722	13.7617	12.3547	12.4978	6.29234	5.80576	6.23171	8.87395	9.42945	10.4224	8.14713	8.83619	5.48131	7.78426	7.92252	12.4938	6.53128	9.07481	7.37459	4.57085	4.53174	8.02164	7.22977	6.39087	10.8809	7.22202	7.80655	5.71933	8.60982	8.85905	12.6491	7.7308	4.95777	10.5988	6.52545	9.79694
PLCB3	7.88552	8.36855	7.5519	4.12755	8.63922	7.14907	8.85654	6.24481	13.3514	8.83556	8.80873	7.90562	10.5884	10.4787	7.46276	8.51401	10.1447	7.0889	8.71968	6.68816	8.7112	8.67677	7.45968	7.94254	7.38524	8.36343	6.96809	7.27405	10.6764	7.94608	9.8536	7.83785	9.47368	9.16667	8.52444	7.86167	5.71229	7.32789	8.02703	8.18246	9.93202	8.71844	9.07925	7.62997	9.96875	9.48694	11.4678	10.0109	4.94557
GCDH	3.65543	3.11353	3.80034	2.36086	4.62164	3.3889	6.36859	2.85217	3.21278	4.6566	4.02871	4.337	4.04157	2.24484	3.34758	1.60501	3.71155	2.69424	2.1837	2.56826	4.15192	4.61313	4.45104	6.07068	4.82117	4.49329	4.36851	3.48003	3.15229	2.8313	4.8449	5.11093	3.2662	3.61249	2.60194	3.14487	3.33141	1.88502	4.05619	3.50627	3.94238	3.39628	3.02824	3.56499	5.93311	2.70242	2.58723	3.70947	2.75236
RRM1	6.18298	11.5063	11.1762	10.1613	5.74369	6.828	15.272	6.84897	14.0501	11.6326	14.4951	8.37176	12.3774	13.1598	12.8343	11.8888	7.18045	6.53642	6.3675	17.0533	7.05827	9.67771	7.85575	14.9138	8.97096	6.48032	9.61127	6.74152	9.60519	6.95055	8.50869	5.38683	8.80641	6.08364	11.4254	8.96488	8.11025	11.5665	17.4763	12.4411	9.19102	14.447	10.5077	15.8872	13.5534	6.05006	7.29205	7.51474	8.66221
ARG1	0.879754	0.798162	0.88917	0.786181	1.36378	0.738872	1.15985	1.05599	0.774403	3.43785	0.782667	0.658349	0.735674	1.06813	1.06739	0.933209	0.880407	0.819841	0.697062	0.799657	0.64277	0.862385	0.946716	0.76229	0.893433	0.863721	0.762926	0.616039	1.32772	0.753983	0.492185	0.840647	0.802742	0.569253	0.767246	0.623313	0.64284	0.814562	0.942089	0.926146	0.628569	0.64874	0.687827	1.05861	1.06947	1.01235	0.780046	0.853788	0.970281
ACAA2	7.77701	7.74203	11.4277	6.18515	7.83672	6.5245	1.74721	9.30887	1.17415	4.31146	2.25228	12.5579	8.64636	6.23754	2.74775	7.56989	8.11088	9.26189	8.54121	8.19176	6.11733	3.83561	7.91969	2.12224	9.01306	10.8731	10.1258	9.85221	6.51064	8.02013	9.46486	5.19891	8.60805	8.78293	3.67018	9.7469	12.6395	10.9753	10.6446	6.5051	7.81406	4.88573	8.03919	1.56332	-0.0977452	8.35206	2.14438	9.96633	8.7529
POLE	0.905054	2.05967	2.61384	2.50855	1.42418	1.85412	2.28645	1.65339	2.14306	1.49667	3.22011	1.57765	3.45783	3.0106	2.00527	1.84196	1.94653	1.4293	0.678351	3.83425	1.83987	2.66481	2.30246	1.84219	1.98098	1.80868	1.16079	1.70241	2.88361	0.52419	1.08706	1.2578	1.2573	1.85599	3.62511	1.92624	1.0724	1.67396	4.69121	2.27116	1.47841	2.68014	2.97052	2.70361	2.64287	2.04851	3.1795	2.10371	2.31005
ACP6	3.40086	3.33439	4.50224	1.64574	3.11391	3.80897	3.05816	3.50056	0.421612	0.872968	1.67004	3.39392	3.23141	3.1303	1.81896	2.43075	0.944699	2.40196	4.44408	2.1665	2.68086	0.694794	2.84604	2.35379	4.02334	4.83781	2.77397	2.43344	3.84113	2.07113	2.32972	4.73203	4.69267	4.61254	1.53865	2.55495	2.92309	2.18459	3.45349	1.43065	4.39825	1.32036	3.7625	1.74695	1.48723	2.36636	3.80976	2.57606	3.59691
ASS1	39.5566	32.9157	31.696	37.5244	39.6288	38.7866	47.6498	34.2225	26.69	34.9745	37.0665	45.8135	33.2301	37.5031	28.0474	30.3321	33.1342	34.6595	33.3823	38.2945	41.9723	43.4301	38.7314	38.2201	43.1367	38.7584	40.8817	34.8362	33.6538	34.8701	33.5888	34.7656	39.7227	41.6643	39.5176	36.9737	31.2069	39.5158	24.3516	36.7411	42.2493	33.6324	38.0206	48.304	42.3263	35.0487	25.079	37.0745	37.6355
HPRT1	16.8351	13.8247	15.2214	15.7063	12.2218	14.2788	15.8648	11.3358	17.3989	14.9548	18.5995	14.2895	19.0714	14.4985	18.2543	16.1008	17.0051	9.57147	11.4076	16.8356	15.7163	16.2519	14.7861	19.955	11.4463	11.5761	15.1796	13.1514	15.835	12.1914	15.7441	11.8593	13.7806	13.8581	16.7107	15.2593	15.2124	16.7704	16.8663	18.2899	15.9634	19.4805	17.7811	17.9343	17.2941	11.1428	17.9825	13.4579	15.0343
PTGES2	7.34122	10.6319	9.1091	9.87079	10.2908	6.80328	8.64654	6.02722	10.6209	9.32077	9.03391	8.48614	11.1837	12.9076	10.1853	11.7802	10.7618	7.68298	8.72789	9.40057	12.5966	13.5387	12.2944	10.447	9.63573	7.91442	9.24533	8.84286	7.95664	10.643	9.37294	8.28619	8.75136	7.93171	10.6015	11.2833	9.0199	10.4659	10.685	11.3159	9.93632	11.6977	10.6732	11.0891	11.8725	6.43042	11.0151	10.4631	11.368
ME2	4.7714	4.11517	8.33029	3.49349	5.42593	2.50207	6.26434	2.65624	1.8681	3.09076	2.2455	6.03907	5.8377	4.09163	4.98448	5.73595	4.73092	2.59375	3.38019	4.39803	3.59413	3.05018	4.1827	5.07237	4.76878	4.06956	5.76646	4.72671	2.0392	3.43628	3.79392	3.90138	3.9471	4.32177	3.84326	4.61697	4.54428	3.78596	5.23319	4.20906	2.97983	2.96259	3.83238	4.65216	4.57297	2.08089	1.57001	4.13249	4.52631
ACSS2	20.7659	11.1644	15.8767	9.62614	14.8397	15.9618	9.55191	14.9082	14.7321	10.1578	11.5442	12.0113	11.2268	8.35356	7.60068	21.0108	8.78497	16.9254	12.2134	8.58962	10.5339	10.3004	10.5406	8.4589	11.8617	14.3329	14.1441	12.8901	10.3001	10.8975	8.6391	12.9492	10.517	13.4928	11.056	8.63105	9.56063	18.5181	11.5696	9.98649	11.2267	10.5081	7.46424	9.11758	11.9792	15.066	16.8798	10.8188	9.59759
NAGS	2.06892	5.74261	4.71584	2.27809	4.16245	3.34151	4.13425	2.38744	1.99654	3.76815	3.3378	5.37191	4.55361	7.99425	1.62253	1.99215	5.4986	2.63646	2.56586	1.6603	4.32738	2.23958	5.17189	3.17724	2.92026	5.55189	3.75552	4.08831	0.941295	5.44838	2.84253	2.92573	6.96591	3.90949	3.96968	3.89267	4.48677	2.90262	3.14056	3.55184	4.35795	5.38466	3.04727	3.88209	2.28236	3.01099	3.20528	4.09287	4.12085
CA14	0.721306	1.05082	1.23501	1.52673	2.01497	1.02153	0.971591	0.0426047	1.66867	1.1964	1.09063	0.937104	1.0989	0.802022	1.08256	0.96986	1.07875	0.817108	0.753592	0.946808	1.15185	1.63936	1.4884	1.57789	0.726249	0.950388	0.645732	0.801894	1.52563	0.593598	0.721442	1.34596	1.29056	1.06724	1.24185	1.16969	1.40784	1.09518	1.10398	0.798913	1.16434	1.2278	0.832935	0.968833	1.09639	1.51587	1.18016	1.21619	1.05079
ADCY3	2.54719	4.83456	2.15776	6.15558	0.98125	4.40454	4.41965	4.14216	6.88532	4.99872	7.91745	0.340349	6.24535	6.68923	7.77602	5.8341	3.39345	5.32066	4.40879	7.55224	2.65563	5.02394	6.54908	5.17122	3.38129	2.34919	4.87201	3.11904	5.52651	4.41965	4.30573	4.38953	-0.452911	2.20912	6.70199	5.19282	2.28993	3.49322	6.20719	7.76566	3.16961	8.64875	5.45798	7.17269	7.30601	6.11007	6.97027	4.09668	4.25296
HMGCS1	11.5759	6.74169	7.13088	8.25596	1.63756	6.5603	21.6357	13.0239	25.4903	21.4615	15.711	10.2237	13.404	9.31291	19.767	7.91873	5.17633	12.5915	6.6901	11.998	4.4613	18.4759	10.3372	19.9641	8.25898	4.87044	11.9664	6.6715	4.25907	-1.45441	11.9248	1.09284	5.79733	1.83087	15.1623	8.09185	8.21125	14.4303	3.82191	15.6383	3.69163	15.6846	11.3153	19.1994	13.6273	9.95754	6.60822	8.02547	9.79025
POLD4	5.63471	6.53173	5.99454	6.49102	6.58255	5.35961	10.7571	6.25886	8.54744	8.18618	6.69517	8.65451	7.2915	9.71969	4.96169	10.2621	5.97296	7.05223	8.59569	5.09589	7.86881	7.07757	7.76712	7.73062	8.67431	8.01655	8.82397	9.94086	8.00468	12.4766	7.61801	9.83973	6.55318	7.94419	5.98827	10.29	9.90654	9.22795	6.48492	6.48307	9.28429	6.59209	6.75828	7.50771	8.03365	5.56821	1.97514	7.91662	6.45192
SMS	23.9317	24.9178	21.0394	22.5087	19.0624	22.7842	26.3245	19.8557	26.4433	24.1642	25.603	22.513	31.1781	29.7252	32.5045	23.4576	28.9872	21.66	20.4624	27.8712	26.3938	21.5014	25.5467	27.2323	22.6208	20.9602	21.9856	22.442	22.7338	20.0163	24.1576	19.9839	16.4283	19.1472	28.2037	22.49	20.4663	29.2126	30.0487	30.7973	22.6247	25.3083	27.3674	28.7875	27.4962	21.8999	25.429	26.1331	23.6073
ACY1	2.14217	2.18452	2.42157	3.32907	4.11981	1.29413	1.04888	1.25223	1.76829	2.33412	1.78556	1.0197	1.99583	1.11868	1.49437	2.97358	1.96694	1.98178	1.87512	0.942395	1.82957	1.73489	1.82525	2.11061	1.07407	1.22521	2.6065	0.623766	2.46174	2.28813	1.8137	2.31402	1.31671	1.71734	2.42035	3.33725	1.55483	1.20171	1.7161	0.872615	1.26273	2.12807	2.02553	0.426991	1.65577	0.436681	0.933417	0.466865	2.33515
PIK3CB	2.37332	2.71087	2.48618	3.34942	2.84031	4.97363	8.03159	4.39666	3.80874	5.84919	4.06481	5.62976	5.94371	6.45161	2.5566	7.57751	4.90886	4.0325	6.18499	5.69572	5.81898	7.92742	7.90079	9.93939	12.9079	3.61686	5.28932	7.28467	4.39164	4.84088	2.36487	4.16006	3.99934	5.04577	6.86893	6.8059	3.39534	5.76045	4.50611	4.14669	5.77243	4.30204	5.36222	6.33156	5.74256	6.16682	7.57218	2.50362	3.54933
CHST13	1.33789	0.904403	1.3734	1.23229	2.17606	0.801158	0.580617	1.52297	0.793743	0.390468	0.752977	0.935843	0.982064	0.875002	0.754396	0.607243	0.872584	1.38927	1.53808	0.973782	0.740307	0.634942	2.26461	1.04873	2.33582	0.995027	1.15064	1.28924	1.43361	1.65481	1.5292	1.22672	0.526391	1.00762	0.969796	1.58048	0.710066	1.25037	1.76494	1.1173	1.58397	0.914586	0.569603	0.575014	0.652107	0.993696	0.223642	0.421069	1.49581
UGT1A1	1.15212	0.75649	0.598194	0.493507	2.63352	1.47484	1.1393	0.242739	0.801977	0.707145	0.680178	0.722989	1.11663	0.995566	1.42165	1.28039	0.790659	0.574508	0.95029	1.58406	1.14343	0.697719	1.0494	0.741764	0.72553	0.848345	0.800388	0.636274	1.83817	1.17698	1.03725	1.80287	0.778908	0.163478	0.18008	1.19501	1.55181	0.431829	0.201218	1.09304	0.481157	0.684372	0.821363	0.715766	1.4186	0.599802	0.264052	1.12386	1.04993
ENTPD6	15.0943	16.836	14.862	12.9011	12.0555	12.2716	11.6073	12.3754	11.5687	9.99605	11.1703	13.8624	11.664	7.32918	12.9821	13.8175	17.2285	10.7776	13.8289	12.1794	10.6745	12.1597	13.4387	12.1	14.8042	12.9223	12.3183	13.5236	16.7215	11.2633	11.2094	14.5322	15.6855	13.9618	11.3675	14.0691	11.3345	13.3597	10.0879	13.5335	11.171	9.4223	12.8227	14.8607	14.119	12.1663	13.8048	14.1167	12.3895
ALDH4A1	3.33243	3.28263	4.11939	4.09213	4.51382	2.22691	6.27165	2.68702	6.50887	4.27413	4.69975	3.35806	5.12302	0.594717	4.69006	2.33976	0.937374	2.74343	2.44098	3.96579	1.77092	6.17544	2.61983	6.10016	5.07983	2.49347	2.02326	3.28195	2.65271	3.18304	4.05021	4.47935	1.19975	2.57223	3.27532	1.83477	2.85966	1.38904	2.36341	2.40733	1.21123	3.19396	4.57026	3.54945	4.93662	3.00399	1.46371	2.54124	2.83394
CTPS2	6.93306	7.11973	5.24799	4.0649	2.74873	5.7959	3.21249	5.22731	0.842736	0.712874	3.82717	6.81945	5.08213	5.69899	3.85366	-0.382767	3.33717	3.30865	4.87766	3.76539	2.92769	0.834621	3.80355	4.59014	4.92609	4.70447	2.12337	6.52495	5.65572	6.48822	2.64791	4.29358	5.01057	3.69721	3.48056	2.13758	5.79706	6.57478	8.50154	3.9661	6.93707	2.21077	4.25789	5.15799	5.33386	3.59284	7.40874	8.29084	4.20341
HAGHL	0.867209	1.62023	1.81812	2.1459	3.09221	1.16398	0.900116	1.5872	2.22157	2.01917	1.3572	2.72083	3.19664	3.4942	1.73676	1.62226	2.01948	1.40412	1.57142	1.18013	2.03058	2.22855	3.25895	1.34572	3.23156	1.91922	2.28687	1.8846	2.99318	3.70481	2.69822	3.86829	1.00596	1.04791	1.67421	2.79636	1.1703	2.71825	1.39955	1.21345	2.28237	0.88818	1.37432	1.55571	2.7298	-0.435361	1.10661	2.40721	1.83809
ACOX3	6.14283	4.38411	5.19603	4.5665	6.72695	6.89745	3.62868	5.25489	6.4212	3.96163	2.18026	5.16814	4.11421	5.43941	4.48445	5.61847	5.50377	5.15221	4.67911	5.46235	4.23684	4.02437	5.04022	5.86968	5.83415	5.77496	4.75406	5.28183	2.24131	6.13882	4.27714	5.69696	4.88467	4.76258	3.71061	4.99917	6.31246	6.11922	3.0358	2.99407	6.43892	2.73373	4.96344	2.18906	3.10234	4.83625	6.64104	5.59284	4.18641
PLA2G4A	26.2539	29.9103	20.8179	19.2268	32.3286	22.7516	25.9252	15.2319	33.9098	13.0471	14.162	21.4428	13.7584	7.1327	24.1113	13.6518	13.3266	14.5715	36.0285	14.6398	24.1404	21.7073	24.4041	27.3442	6.95688	18.5202	25.2742	21.5604	37.8997	32.5221	14.1906	25.6755	-7.38949	19.2894	22.324	14.8242	34.9625	25.9892	16.4797	7.11346	14.5478	16.8998	10.3289	21.7885	23.4633	15.0495	13.7711	17.3378	24.8431
ACOX1	6.9656	11.2383	11.917	7.60515	9.06873	8.72717	8.61326	8.74254	5.38433	8.83892	9.26066	7.5253	9.04444	7.59914	8.62458	11.036	6.75224	8.38233	9.4682	8.3665	9.24109	8.66113	10.7979	8.4063	12.6944	8.50854	8.25614	7.78147	9.84644	9.59853	7.71838	10.1324	8.61933	10.099	5.72617	9.94186	10.6831	8.03623	9.37772	8.11159	10.8154	7.27263	6.53744	8.93707	10.4701	8.65763	9.15588	9.91644	10.9229
ENTPD5	3.6256	2.86185	3.05425	3.03063	3.09665	3.3172	3.97749	2.0432	2.33889	1.96983	2.5453	3.27868	2.99534	1.17634	2.24301	3.36122	2.27056	2.05459	2.99534	2.84941	2.30245	1.84421	1.54075	4.26283	2.17466	1.53186	2.35938	3.13792	4.19417	3.5541	2.19894	3.43318	3.37113	1.52969	3.21769	2.31318	3.58712	4.5844	2.73376	2.93015	2.55534	2.63834	3.05879	2.29134	3.86411	2.43732	1.68034	2.19345	2.00035
PDE3A	2.00267	3.69947	0.810212	2.59213	-2.07664	1.69287	-0.948867	3.45127	3.19431	2.51886	0.314522	-0.562795	1.51368	1.16747	-1.21342	0.650377	2.983	1.27115	4.01514	3.04073	0.94466	0.834684	2.61498	2.58565	3.96869	-0.161564	3.91987	8.99264	-0.862657	8.65773	5.02305	5.51112	-1.43524	-0.448081	-0.587455	0.616248	0.539469	0.779776	10.8704	2.05179	0.587137	0.695105	3.42468	0.261843	1.5114	2.93076	0.155	1.35306	3.06937
CYP3A4	1.499	0.842232	0.885659	0.890919	1.0414	1.0121	0.91491	0.959541	0.919422	0.943908	0.853939	0.942294	0.817359	0.993044	0.866156	0.778251	0.980876	0.903627	0.897264	0.876838	0.949591	1.00128	0.792525	0.91362	0.837079	0.902674	0.842882	0.854105	1.22379	0.872282	0.940459	0.855374	0.915931	0.897122	0.980656	0.882758	0.923616	0.984769	0.840074	0.871519	0.895241	0.863413	0.872565	0.907851	0.919285	1.02727	0.973594	0.969826	0.921953
INPP4A	4.68229	4.35522	4.61672	3.50507	3.34168	3.86953	4.55491	2.83016	4.07291	0.455974	2.85637	2.37086	1.91439	2.72208	3.72135	2.66841	3.46885	3.23266	4.21068	4.11329	3.18296	2.31709	4.20808	0.445892	2.8293	3.82201	5.01051	3.64206	2.91551	2.94172	2.65156	2.29759	3.99956	5.24674	1.76206	4.31425	3.48989	2.68535	2.31737	2.85613	3.87469	2.8689	3.13364	3.67429	4.20289	2.47313	3.54701	4.32091	4.41898
ADSSL1	2.46293	5.39555	2.99157	3.36141	6.02106	2.26394	5.7045	0.619751	4.0024	5.48824	2.7726	0.983506	5.75428	2.19211	4.36454	-1.5068	0.171617	0.640945	3.74133	-0.299223	2.73867	3.67776	3.21844	3.37163	4.93264	0.144588	0.65337	5.29014	6.56492	5.72282	1.4001	6.75488	2.60181	0.561712	1.75497	2.65622	6.14678	4.90009	1.52832	3.39283	5.65078	1.24983	4.17514	3.43072	2.50813	0.787205	0.276778	3.53388	3.54928
POLR1B	3.45652	5.66823	4.51229	3.87451	2.3575	3.75141	6.76185	2.46944	6.32058	3.12386	5.04602	5.26641	3.86443	4.11482	5.91737	3.26985	5.35663	3.82693	3.24055	4.85484	3.95049	3.40971	3.83189	5.03963	2.39102	4.57561	3.35089	2.54178	3.29526	3.08285	2.83457	4.35703	3.69559	4.85547	6.2021	3.26454	4.53336	7.07072	2.83018	3.22937	3.65508	3.70688	3.46717	6.74261	5.72974	3.19365	6.83994	3.10101	3.62488
CTH	4.42283	5.66224	11.0543	2.17088	-1.441	6.94577	5.38352	2.79924	-2.19425	-0.851442	0.247107	5.80694	3.30952	0.237454	5.62546	4.96188	6.79941	1.07687	6.50009	3.41357	1.02833	-1.41675	1.86233	4.55014	5.90344	0.412198	6.28629	1.42692	4.60304	1.50335	4.63182	6.32173	4.55766	2.74551	0.850025	2.8401	4.18109	2.79486	6.28128	1.89992	2.15971	5.08129	1.68391	-2.57252	5.13289	-1.05426	2.46769	1.39527	5.96002
CPT2	9.29124	4.97412	11.7627	5.13041	6.51079	9.1936	9.91917	7.41701	8.51099	5.20917	3.16609	8.5903	6.84439	5.60449	5.92736	7.08119	3.96042	6.99924	7.6439	5.82001	5.20631	5.74008	6.16601	7.7047	7.5271	7.26615	7.02617	8.66563	7.73385	10.0063	6.26901	10.3197	8.3292	8.55751	4.89855	8.245	7.62129	5.45815	7.21824	4.88816	5.9571	6.06666	6.51919	5.7752	6.26822	4.63401	2.14497	6.15477	6.26324
PDE8B	1.43616	1.30562	1.70019	1.14186	1.48026	1.63176	1.2492	1.99386	0.998954	1.06702	1.02127	1.6904	0.870149	1.08296	1.06783	2.75087	1.00071	2.19189	1.52951	1.0755	0.970738	0.986435	1.02892	0.967574	1.69551	1.60415	1.42979	1.25055	1.23545	1.91594	1.16225	1.46682	1.524	1.29114	0.828359	1.01309	1.1102	3.01114	1.44198	1.2373	1.15016	1.31317	1.13414	1.07815	0.985051	2.05825	1.21052	1.10554	1.15183
CMPK1	39.3338	35.1279	38.8157	36.1679	40.0977	38.9438	37.5109	36.2445	36.4332	34.7684	34.5854	38.6225	36.7105	36.5875	31.849	37.53	36.0941	36.8284	38.2632	38.6296	36.7358	39.3055	36.044	37.6943	41.5104	37.0755	36.752	37.7746	37.9449	37.8696	37.7373	37.5621	37.3627	35.5251	34.0524	37.647	36.3952	33.5593	37.9194	34.5885	38.0537	35.2534	34.0313	32.8945	34.2515	35.4649	37.4938	37.8003	37.1737
PNP	7.63484	11.0417	11.3726	9.02169	6.52904	7.72542	15.1809	7.64655	18.2799	11.4329	11.3161	12.2473	14.7381	10.3937	7.28144	7.18396	11.118	7.24317	15.658	10.5518	14.5376	12.1961	12.6406	12.2086	13.0861	6.11757	12.365	11.7161	9.37617	16.7568	15.3957	13.5304	13.5219	7.44339	12.8012	12.4442	12.618	12.8722	17.5085	10.4686	10.9868	12.1458	13.0603	10.2686	11.8056	6.88322	3.53194	8.30057	10.0963
RRM2	-3.44651	9.95402	9.76305	9.70211	-12.1835	-1.06764	13.1446	-4.75326	10.0557	11.7147	12.2649	2.09637	11.4935	11.8438	11.1259	10.539	11.1998	-3.81333	-0.611744	15.5809	7.84134	11.784	6.32976	11.437	7.06092	-0.066028	6.23405	7.04067	11.163	6.35531	11.1516	2.19744	-1.72657	-2.45096	12.4109	10.9483	1.90687	11.0526	12.1287	11.1099	2.26982	12.134	8.7167	11.4133	12.531	7.27481	6.11262	6.46291	11.1132
INPP5J	2.67182	2.01733	1.6099	0.915418	3.29804	1.95701	2.54917	1.37111	2.24321	2.57123	1.91257	1.79536	2.08301	1.63868	1.1834	1.50724	0.745497	1.12347	0.320376	0.767495	2.02589	1.23936	1.39624	2.05777	2.09782	3.63501	1.97066	0.968143	1.9909	1.50403	1.19864	1.85776	2.57177	2.90723	1.35347	1.45333	1.06268	1.74714	1.84177	2.16694	1.04761	1.84019	0.68119	3.24167	2.86254	1.87749	1.8263	1.57171	2.75513
GCK	0.665065	0.569248	0.40996	0.896812	1.24397	0.847289	0.476142	0.669667	0.67933	1.09779	0.916534	1.00242	2.12832	0.878831	1.38399	1.09629	0.756835	0.85664	1.08925	0.932642	0.759586	0.955207	1.1155	0.543675	1.6111	0.571807	0.617792	0.430608	0.644984	0.847543	0.974628	1.06266	0.554447	0.740103	0.755386	1.16235	0.473739	0.703829	0.902235	0.695076	0.896209	0.977724	0.668771	0.686224	1.09866	0.632606	0.952506	0.47717	1.44578
TSTA3	28.7868	22.2894	21.6726	19.0909	27.3442	21.5005	22.0359	16.1532	22.5522	22.2514	15.9276	28.4462	26.0056	25.5129	22.0526	17.5249	20.8791	14.859	21.7381	23.1093	20.9464	19.2309	21.4197	24.022	21.0219	19.9628	21.304	23.6987	24.2917	25.1351	21.6453	29.0399	18.4928	18.9475	19.1621	19.4914	20.85	20.2153	20.7639	17.0067	14.5339	17.6833	18.1784	24.7947	23.9578	22.3019	20.0212	19.4947	20.1798
LAP3	24.6301	23.8777	28.0204	24.6303	21.8661	24.8187	21.154	25.9006	17.5538	21.8257	20.5847	27.5358	23.9927	26.9413	25.9261	29.1256	27.8719	26.8706	24.5167	24.6978	26.2252	23.4624	28.8159	22.7346	24.1647	25.4953	31.203	31.326	18.2279	26.9119	24.6568	23.3417	22.3013	22.8455	24.1403	33.4565	23.8355	24.9301	26.9303	23.3465	22.0952	23.0972	27.1378	15.7873	22.8455	24.7745	20.244	29.1537	29.4178
TYR	0.824777	0.74068	0.79117	0.832878	0.824544	0.72554	0.735637	0.754254	0.811226	0.78933	0.759693	0.777426	0.796173	0.829041	0.771324	0.782332	0.788273	0.769345	0.797806	0.794364	0.760142	0.779265	0.74698	0.838761	0.823647	0.773122	0.751339	0.808686	0.786521	0.76168	0.749286	0.874657	0.807653	0.763415	0.783718	0.799576	0.825548	0.829345	0.815845	0.812418	0.826852	0.802849	0.809395	0.799771	0.781056	0.782286	0.9041	0.805265	0.826806
ACAA1	7.1824	6.39101	6.71338	5.29842	8.10458	7.16026	4.9199	7.20869	4.91452	5.46387	4.51219	7.45921	6.60824	5.81327	4.97278	5.04736	6.34744	7.63288	7.0065	5.06925	7.91577	5.10477	7.22005	4.62509	5.09633	7.48472	6.82407	6.65973	5.60213	6.93512	5.85135	7.88808	6.62072	7.61696	5.2169	6.63147	4.96154	4.71979	4.80271	5.55989	6.85796	4.6716	4.72158	3.91471	4.39102	6.61512	5.32283	6.13214	5.92765
AKR1C3	24.374	6.39467	31.7281	42.0387	41.0085	19.6992	43.6009	24.4008	15.389	30.5334	42.4061	29.8738	34.661	-8.92298	-3.95083	41.6699	8.02473	24.5823	37.7892	35.1495	9.71658	29.6514	19.0642	33.9602	34.6212	33	16.1852	39.5326	41.5289	38.2641	20.9226	41.6432	36.2393	20.9211	41.0669	10.7385	41.2731	40.4094	25.833	36.9511	12.5546	34.002	21.202	39.5302	41.5625	28.2981	29.55	19.6586	16.2409
TYMS	-0.669722	5.51909	8.51177	6.56118	-3.79614	-1.69495	7.98787	-1.50973	6.48975	6.99577	12.6396	1.42681	11.9645	12.3642	9.85111	8.83234	9.1407	-1.63292	2.37114	11.7566	3.18318	9.82073	9.26526	5.85779	7.15762	-0.274426	7.56471	7.25603	7.88413	3.78782	6.07873	2.56847	1.60701	-0.233653	5.00698	7.32887	3.15641	10.0466	11.683	5.46866	2.24084	6.79742	8.49673	8.48646	10.5387	2.52557	2.76969	4.15318	12.7793
AGPAT4	1.64056	1.5565	1.2971	1.28316	0.833073	1.53119	1.06859	2.18606	2.63926	3.42464	1.28315	1.31345	1.59197	1.54088	1.6706	0.728259	1.42928	2.37887	2.01824	1.48465	1.30882	1.88017	1.94227	1.8248	2.42368	1.41687	1.53019	2.09641	1.12032	2.00921	2.2182	1.07998	0.84722	1.85396	1.72783	1.53629	1.9206	1.0795	1.30269	1.85557	1.47748	1.49538	1.82867	1.07776	1.36424	1.99811	0.897791	1.58072	1.09132
NT5C1A	1.00234	0.914291	1.59716	1.39503	1.45228	0.687026	1.09315	0.67905	1.96663	0.820828	1.18168	1.65141	1.2009	1.6154	1.61121	1.32792	1.56188	1.70364	0.854146	1.06586	1.95324	0.83701	1.18526	0.856157	0.915956	-0.070141	1.41439	0.536165	0.875322	0.355291	0.206718	1.00469	2.66815	0.983994	1.3105	0.925315	1.47997	2.01925	1.25197	1.35136	0.967424	1.01164	1.2566	1.26342	1.32495	0.638641	0.670609	1.28731	0.986714
LCLAT1	1.25635	5.11789	3.54657	2.40191	0.340654	1.65155	4.29462	1.75057	5.68905	5.41295	4.88899	2.77209	3.53258	3.18748	3.81293	4.45408	0.716929	0.545211	2.07543	3.21013	0.5892	3.49847	3.97717	4.92347	2.71165	2.22222	1.30464	3.93472	4.02359	3.52398	1.91081	2.8265	1.73525	1.60049	3.24695	1.94308	4.10704	2.51549	3.89712	5.65746	1.44938	4.76742	3.37707	5.02419	5.09388	2.84964	2.65401	1.67477	2.12594
GSTA1	20.1529	10.9762	15.1681	26.2264	13.4855	23.5334	25.9791	19.3141	1.8492	21.0917	24.3588	17.1593	30.9968	3.07555	16.3821	27.856	13.0426	6.69512	14.5936	30.9804	12.166	15.7192	3.92778	24.1744	30.0651	30.0239	12.1669	24.3179	19.6868	15.1711	8.55003	27.4828	20.7278	22.7943	22.4884	7.13507	27.7598	23.0297	31.3055	27.849	7.98371	27.7694	7.64019	25.8892	26.3126	22.0083	16.9465	20.7013	8.49717
PTEN	7.40621	5.92576	4.92828	5.80151	7.2311	7.95813	6.56461	7.98434	8.46876	8.15352	4.63633	7.18263	4.36681	6.92257	-1.49971	4.90011	6.75788	9.11358	7.91575	6.13356	4.36312	7.52876	6.73604	3.33708	6.87584	7.85217	6.74171	7.33497	3.16434	7.48257	7.50786	6.92824	7.76755	8.97291	8.44469	7.23696	7.18176	2.13795	6.52425	5.18151	8.09539	6.49581	7.54663	5.10257	-1.78283	7.78097	3.50789	6.30667	7.15713
NOS3	2.39543	7.70143	11.9775	1.89366	10.0809	0.73731	-0.443193	1.73504	3.31748	2.03286	0.21126	3.46832	4.0182	6.83231	3.74263	6.89902	2.47309	3.17316	1.57729	3.66524	0.901769	-0.0446744	8.02763	3.99419	13.878	1.51285	3.96226	3.81669	6.38976	5.60548	3.83085	7.43597	-1.68495	0.268053	-1.82445	6.44812	22.5127	4.08183	-0.129831	4.98636	6.77361	0.206818	1.29595	4.03038	9.11811	5.63168	19.4647	4.91777	2.00935
GSTP1	234.918	233.536	237.519	234.928	240.022	232.899	241.078	234.637	240.741	239.786	236.047	235.233	236.76	228.974	236.329	240.05	230.955	232.648	236.856	237.876	236.051	238.999	228.223	239.105	240.988	235.823	234.523	236.273	241.122	237.524	235.445	240.768	237.454	234.978	236.941	232.017	237.988	239.868	235.098	236.202	234.721	236.476	237.737	239.857	241.366	234.496	229.429	233.641	235.899
CHDH	2.00158	1.39592	2.12933	1.37875	3.53738	2.66817	1.35521	2.45425	1.36138	1.18688	1.21807	2.2869	1.389	1.95598	0.741545	1.86342	1.95838	2.72657	2.26495	1.1459	1.45834	1.41825	3.47593	1.2049	2.67019	4.81467	1.16047	2.69779	2.18291	2.56779	1.55035	2.534	1.90011	2.64242	1.18776	1.44155	2.76786	2.21561	2.37065	1.52076	2.70714	1.42261	1.51831	0.760623	0.846606	2.55885	1.45622	2.27917	2.0034
ACACB	1.6254	1.37987	1.48863	1.93982	2.10152	2.54113	0.893217	2.8578	1.02479	1.08345	1.56523	1.8319	1.32399	0.983212	0.873602	1.22857	1.41386	3.35099	2.13452	1.37205	1.68795	1.52195	1.47902	1.52444	1.84352	2.43945	1.64751	1.828	1.60065	1.84429	1.08179	2.33972	1.86699	2.77996	0.966165	1.95485	2.18425	1.57975	2.135	1.34579	1.94982	0.997134	1.22513	1.1103	0.63205	2.50845	1.33954	2.15712	2.16583
FTH1	205.167	205.323	205.471	204.478	206.583	205.888	203.323	206.117	198.698	197.369	204.212	206.223	202.026	200.911	203.664	206.414	203.566	207.311	206.009	202.487	205.517	201.386	207.965	201.815	206.654	203.885	206.514	204.26	201.613	203.961	204.458	204.466	206.925	203.669	203.291	206.127	208.562	208.74	204.003	205.5	207.498	199.724	204.6	200.879	202.273	205.572	205.083	206.75	203.362
GAL3ST1	2.79789	2.60484	3.86937	0.985942	2.38757	1.89776	0.491067	1.60013	1.16914	0.870772	1.85452	3.9826	2.15421	2.39072	1.48435	1.10204	1.43639	0.91485	2.45611	0.704168	2.14717	0.854375	2.35475	0.635836	3.16804	4.04824	1.716	3.34893	2.69734	1.72411	0.757249	2.64803	2.94174	2.70977	0.625989	0.44337	3.74398	0.903069	2.03251	0.662139	1.05488	1.26866	0.844843	0.871671	0.46374	1.98325	1.3818	2.7348	2.04577
ENPP7	0.90357	0.915897	0.932916	0.927437	0.953958	0.936002	0.936064	0.92226	0.966789	0.907381	0.893563	0.912139	0.968004	0.99244	0.93504	0.886637	1.00492	0.973062	0.939192	0.94565	0.948373	0.908668	0.969864	0.902291	0.846552	0.872325	0.860945	0.904042	0.978026	0.941296	0.893537	0.92065	0.99781	0.937362	0.864828	0.914985	0.958958	0.912123	0.94311	0.959793	0.974108	0.929738	0.965126	0.949959	0.904468	0.929677	0.988303	0.995745	0.861011
LALBA	0.858904	0.827405	0.877896	0.856938	0.947649	0.839589	0.862543	0.843098	0.920085	0.881598	0.907053	0.793409	0.848708	0.797739	0.886892	0.82445	0.77037	0.910807	0.815442	0.843332	0.838154	0.846914	0.846527	0.853161	0.803739	0.823978	0.80293	0.828154	0.821825	0.830902	0.810695	0.902708	0.865748	0.779124	0.881287	0.829714	0.883097	0.891724	0.8054	0.876121	0.790139	0.836136	0.89434	0.826887	0.857016	0.836809	0.80733	0.819013	0.856381
PLCB1	2.41293	3.74271	1.27443	1.96064	-0.0330032	1.26363	0.620264	1.23589	0.938488	1.43343	1.28468	2.09514	1.6453	-0.239208	2.58479	2.95073	0.669619	1.3043	2.2765	2.24815	1.60832	0.355703	2.43003	2.35438	1.4575	0.47334	1.45994	2.78779	2.99504	2.53377	1.28506	0.392077	-0.0530862	1.61088	1.14103	1.35653	3.59909	3.19869	2.4873	1.60052	0.0864802	2.02389	2.02452	2.17288	1.32115	1.99674	3.92302	0.734546	2.1171
POLR3B	2.29013	1.63454	2.48782	2.16595	2.57176	2.16175	2.75718	2.02352	2.57732	5.17322	2.6699	2.15484	3.36542	2.53724	2.6553	2.08097	2.70146	1.8827	1.17644	2.67754	1.30366	2.60127	1.87995	2.9549	2.00128	3.01042	1.89982	2.39369	1.97907	1.60762	2.46447	2.24722	2.04153	2.73145	2.36262	1.91589	2.72233	1.56113	3.60073	1.98585	2.03427	1.50998	2.39107	2.446	2.94037	2.04503	2.39922	1.82807	2.1305
GMPPA	9.27544	8.26473	9.99714	9.53012	7.61066	5.07324	10.7353	5.01905	6.57901	6.5473	6.56918	7.85478	11.1206	8.37568	8.79108	9.55631	9.55484	5.11306	8.4544	7.30224	7.20905	7.64476	9.05953	7.01984	10.5924	7.08757	9.9595	9.21972	11.6937	9.40639	10.4638	10.5593	5.88303	3.615	5.56548	6.96612	11.7907	8.60892	12.1446	5.3291	8.36094	6.55183	10.0996	7.65502	3.82953	7.44616	9.1262	7.15492	13.2777
PGM3	7.81197	6.77664	4.63483	6.02082	3.81079	3.57148	3.55462	4.32981	8.26338	5.4688	3.84579	5.80149	6.70546	9.05219	5.03243	7.19979	4.57896	2.97115	5.80418	5.82046	5.29651	4.06193	6.56907	5.26348	6.69086	5.12081	6.77514	7.45789	4.73211	7.44649	8.93223	3.0629	3.90704	4.98946	4.4167	4.50662	8.3621	5.01345	9.04698	6.06037	6.75051	4.6002	9.96401	4.02277	7.24517	1.76449	5.12118	4.89369	8.41281
NMRK1	5.62173	4.66197	3.54654	5.31248	6.05241	5.86217	7.35775	6.22461	7.3126	4.74288	6.42167	5.43563	4.47975	6.744	5.84248	5.98583	5.34618	6.46734	5.91225	4.98602	7.34598	6.03447	6.31351	4.31222	4.68664	6.69584	5.57615	4.69183	2.86125	5.9814	4.97494	4.04075	7.24853	6.60314	7.39785	5.90216	5.05244	3.35054	4.38296	7.92496	5.36111	7.23329	5.26483	9.13608	7.23199	4.59063	4.75838	7.94618	5.62235
DHODH	2.17616	2.0366	2.44466	1.83906	2.13911	2.44156	3.16463	1.75831	3.19321	2.3249	1.70571	3.16396	2.24832	2.93293	2.26374	2.44222	2.73766	1.81884	1.76398	2.14984	2.10758	1.68431	1.41482	2.12771	1.62058	2.16294	2.1978	1.62276	1.66014	2.55007	1.66199	3.12099	2.05081	2.50254	1.64701	2.2886	2.83532	2.1364	2.07689	2.08167	3.79209	2.08945	2.11607	2.95854	2.19578	1.75872	0.977848	1.97184	2.13791
ACADS	5.75181	6.8045	9.93037	7.47117	9.50236	6.80248	3.31102	7.91259	7.54337	5.23719	7.27257	9.7883	9.11805	7.83272	4.15492	8.33091	7.10555	8.47926	8.69452	7.4122	8.98467	8.30666	10.572	8.63808	7.9084	8.83334	6.93113	10.4657	9.2284	8.26926	4.99103	13.0338	14.6434	9.87383	8.03092	8.87309	12.9205	5.74368	7.21796	7.30085	10.3438	8.29462	6.22943	3.94063	10.1753	7.02047	6.64905	9.91882	8.80155
NEU3	1.55051	1.85425	2.08982	2.26373	2.79218	1.66539	1.88068	0.778334	1.63923	1.97673	1.57959	1.99899	2.28722	1.55736	2.74924	4.21213	1.38009	1.08889	2.11934	2.55564	2.84441	1.05095	1.71452	2.14123	2.31668	1.38898	2.14953	1.19252	2.24228	2.3371	2.60635	2.66764	1.68141	1.89611	0.933095	2.64847	2.16021	3.18298	2.51837	1.8852	2.47176	1.39704	1.70231	2.56295	2.10122	2.49526	3.29707	1.61557	2.75249
PMM1	11.5142	6.90911	9.13723	4.01867	11.3367	9.30816	7.18111	11.6557	4.36804	5.40951	10.3277	10.4089	8.92962	5.58171	9.97819	7.72825	3.97918	9.43258	13.6166	5.38456	9.77009	1.91158	5.66373	5.56612	9.67448	13.945	7.40273	7.49571	4.62101	7.88169	5.93923	10.613	14.2148	9.98115	2.28518	5.27152	11.9492	5.81129	7.78223	8.31214	8.0969	5.45816	3.95244	9.18807	7.8877	8.60987	0.956797	7.73358	7.66044
PNPT1	2.3596	8.38198	7.78384	5.77226	4.64372	2.21476	8.06394	2.79047	8.88275	6.84259	6.96357	4.60544	7.31446	8.74831	8.73265	8.09107	6.44554	2.27524	3.56624	9.25159	2.52211	6.11854	7.27984	8.98403	6.57673	1.459	4.05532	6.20605	5.60489	6.30719	6.29005	6.30932	0.63336	2.26365	7.99792	4.54222	4.645	6.93531	7.70761	8.26594	1.95984	8.35567	8.24594	9.88375	10.8943	4.97395	8.07161	4.31357	6.28661
GSTO2	0.537998	2.26189	0.764511	0.339219	2.41289	0.909231	2.92251	2.08993	2.76278	2.86497	1.41933	2.76634	2.7024	2.20079	3.16423	2.02338	2.64924	1.72505	1.26835	2.16857	2.12383	0.795232	2.23608	2.35683	2.57456	2.25449	0.955011	2.11318	2.28218	1.39294	0.461366	2.90443	2.69218	2.09061	0.780949	1.44931	3.19201	0.539027	0.387563	1.26294	2.30467	2.60296	2.08752	1.36454	0.606075	2.05879	1.52625	1.68511	0.364785
POLR2J	18.345	18.3765	15.4726	20.5754	19.7174	16.0349	21.7535	15.9119	17.4646	20.3424	16.9846	17.6701	20.9533	19.9486	22.2515	24.6076	19.6227	14.702	15.7719	16.886	18.0308	16.4986	18.676	18.6077	16.6206	15.5969	18.4664	15.7547	17.814	17.6094	17.325	16.8491	13.8535	17.783	16.4663	18.0116	13.1943	19.5556	15.0159	20.6996	15.0002	17.6157	16.6061	19.2906	21.3546	14.571	22.7228	16.1497	16.8487
HAGH	6.10498	3.90737	6.51697	4.30175	6.6506	6.12406	4.48727	6.55267	4.47545	3.82438	5.3798	4.71752	4.33722	5.5924	4.74238	5.55292	5.16936	5.36197	5.98806	4.73286	6.24795	4.86653	5.87365	3.51244	6.48987	6.0717	5.27577	5.7235	4.82212	6.39942	4.94512	6.31554	6.39294	5.85643	5.01885	6.30214	6.70327	4.31756	4.46854	5.87311	5.25131	4.50918	4.59998	4.97722	6.46815	4.9968	2.66723	5.50478	5.84681
TREH	0.834603	0.784484	0.823741	0.899832	1.50693	0.599369	0.672834	0.767793	0.941841	0.83521	0.667207	0.66169	0.912241	0.787027	0.761052	1.10688	0.627699	0.895677	0.736271	0.862259	1.06838	0.787713	0.969882	0.58947	0.829363	1.29935	0.835356	1.04882	1.30462	1.17178	0.861553	1.23374	1.06965	0.750583	0.645458	1.27734	1.19881	0.978594	0.819255	0.958895	0.512518	0.911289	0.773729	1.18428	1.38144	0.662505	0.675428	0.965437	1.08677
PAPSS1	18.3593	12.6689	12.2939	13.0473	11.3693	12.5233	16.3333	18.6734	8.92837	13.4037	12.6793	12.798	13.4445	11.0462	12.9847	14.6156	13.0346	16.8555	13.9235	11.7812	14.0989	15.3922	14.4186	16.2075	14.8949	17.3515	14.5193	12.9728	12.2382	12.6934	15.7287	11.581	10.2534	12.3523	12.8313	13.9393	13.9175	12.5576	13.4208	16.0939	14.4621	17.3036	15.0065	15.4922	15.7126	16.6368	13.9087	14.7437	13.1778
UCKL1	6.84914	9.27508	7.91377	5.82943	4.09437	6.02398	4.47546	6.46485	5.39007	9.038	7.13204	6.47541	10.0244	9.15963	7.74216	8.01854	7.35324	7.29878	7.91251	9.34611	5.04288	7.55859	9.52015	9.70629	9.43747	6.37871	9.46895	6.92082	9.59741	8.29595	8.79269	8.33282	7.03935	5.29681	5.73179	8.22209	3.82016	8.65532	9.61762	7.25022	6.07559	9.88	10.5237	9.95024	10.0361	7.22881	3.02445	9.66698	10.6914
PDHA2	0.764056	0.846659	0.831027	0.823131	0.902576	0.780331	0.854527	0.773559	0.839901	0.835792	0.850915	0.836962	0.830752	0.893567	0.879333	0.836271	0.851096	0.760013	0.802911	0.797151	0.828728	0.795078	0.833733	0.855179	0.785066	0.820459	0.810885	0.805212	0.866601	0.815103	0.823324	0.864099	0.857982	0.783206	0.819749	0.822402	0.884703	0.852363	0.824174	0.737699	0.782038	0.800211	0.830384	0.899748	0.827034	0.830529	0.869885	0.806414	0.872033
AGL	6.04549	3.37128	7.29526	1.52531	-1.95661	6.86045	8.52833	4.38423	6.28843	3.32127	2.2718	6.90126	7.65684	2.4084	4.24557	3.90877	3.75453	3.56033	3.71836	5.36748	2.47854	5.00436	1.51487	6.64701	4.64783	4.22766	6.24654	2.37657	4.38788	4.95157	4.05723	4.35334	6.0095	4.67407	5.22302	2.6894	4.15116	4.7451	6.43462	0.71029	2.83892	4.95116	6.65684	2.42368	2.63195	4.25092	5.71447	2.3586	7.36026
PPOX	2.33684	2.16463	6.52448	4.08241	3.57231	2.27138	2.79008	4.19739	2.76288	0.946412	2.01216	3.92076	3.14276	2.3238	2.98485	2.55282	2.16691	2.43646	3.00277	2.14307	3.65617	2.16834	2.24444	2.16226	3.22244	3.45788	2.89891	2.9134	1.30702	1.99375	4.17435	3.35112	4.80547	3.18569	1.74611	3.15866	3.28434	2.20597	4.61472	1.55321	2.30055	1.89511	2.71215	2.54784	2.462	0.272706	5.10876	3.22134	3.96957
AADAT	3.44152	2.20772	3.61603	1.89146	0.982838	3.14567	2.78853	1.96414	0.646313	0.741563	1.68661	4.49488	1.58282	0.82099	2.67528	0.476358	1.36017	2.49527	2.76169	3.28789	0.264848	-0.414232	1.99239	2.06056	1.68491	2.63668	0.715663	2.21783	3.13687	1.2628	0.961857	2.4444	1.67799	1.77532	1.89283	0.867544	4.66556	4.81496	4.74284	2.00165	1.43788	1.29894	1.16366	2.04346	1.24511	1.89947	3.3081	4.25188	-0.20882
PLCE1	3.27696	2.38297	3.50184	2.89867	2.13828	2.83068	3.2514	4.20087	0.881992	0.625191	1.55972	2.11626	2.44426	1.06396	3.51499	3.62243	2.14351	3.81113	2.65259	2.55166	0.904868	2.07294	1.26353	2.04456	2.57223	2.96183	2.44508	2.60596	1.36758	2.45358	1.36118	2.87081	1.80891	3.27106	1.05214	1.1975	3.88465	4.16593	2.42698	1.58891	1.38977	1.41189	1.22483	2.01107	2.07932	4.14443	3.15797	2.05971	3.52055
LCMT2	2.29906	1.91992	1.85038	1.7707	2.3566	1.57428	2.02265	1.6817	2.59048	2.12461	2.20384	2.20763	2.15495	1.08634	1.79323	1.72672	1.76595	2.53094	2.48577	2.60835	1.20804	1.75885	1.58109	2.46257	2.0002	2.0389	1.58636	1.93257	2.45263	1.83315	2.08092	2.96592	1.75937	1.91904	2.14093	1.49769	2.13528	1.67599	1.27369	1.80034	1.80819	1.64486	2.0032	2.91725	2.42405	1.47841	1.41338	1.90201	2.25637
TPMT	11.1213	11.2562	13.4378	8.90131	11.2548	8.96502	8.48716	7.10551	9.58842	9.71525	7.74758	10.0657	10.0763	7.39717	13.1074	11.2395	7.40159	5.01609	8.12338	10.4634	8.29367	8.53897	8.88671	11.3953	9.37495	10.176	11.0986	9.56634	8.22259	9.70176	9.95109	9.11025	9.38368	8.05735	6.35733	11.8929	11.8399	10.6537	12.7607	7.7813	10.7698	8.65606	7.35648	14.2477	12.9618	7.85162	11.16	7.82751	10.3013
CYP26B1	1.03673	3.31214	1.5179	2.41647	2.06379	1.92122	1.81753	2.45805	5.06728	3.94449	2.70432	1.57118	1.96156	0.803779	0.564671	2.37359	1.97908	3.5871	2.05256	1.50427	0.781353	1.86791	2.85088	1.13613	0.239009	0.350095	2.06272	1.49937	0.0591793	1.16389	1.71747	1.8891	0.502214	0.738333	2.26745	1.64576	2.22985	3.11306	0.703593	3.10949	0.665952	0.976346	2.51602	2.93031	2.13312	1.51612	1.54349	1.30559	2.1284
DPYS	0.934242	0.102836	1.22894	0.55864	1.47542	2.34218	-0.1772	2.48242	0.826653	-0.1105	0.227551	0.843036	5.11425	1.33859	1.06651	0.914513	1.35751	2.25142	2.89495	-0.169265	0.851055	1.0163	-0.172321	1.06451	0.570349	2.70702	0.733642	2.8675	1.94028	0.799532	1.0939	-0.346528	1.63875	0.6842	0.346605	2.13303	2.9309	2.29136	2.09282	-0.0815157	0.0322173	0.402705	0.12212	-0.0473146	0.716002	0.552466	0.719578	7.39701	1.93662
HEXA	8.28011	7.66516	7.4158	6.87621	8.47392	7.19209	3.37498	8.22181	5.13601	4.43318	4.48724	5.29118	4.45794	6.22903	5.61383	6.66074	8.19559	10.6421	7.8963	7.60502	7.28835	5.6193	7.03335	6.94781	10.1504	7.13977	8.14011	6.61274	7.88002	7.36622	6.53032	7.42896	5.50119	8.12371	8.37743	7.74102	7.00813	6.41866	6.74002	7.10415	7.60975	5.91698	5.88163	2.83992	4.9336	10.2873	6.94086	8.7079	6.65218
POLD3	2.56019	3.9058	4.5704	2.45964	2.9847	2.88548	5.53637	3.81399	6.35207	2.90315	3.57031	3.03673	2.83575	4.60288	4.00355	2.97504	4.25993	2.89073	2.77985	4.50389	4.14121	4.27646	2.97866	3.83776	4.26184	3.60727	4.26554	3.34764	4.36071	3.09931	3.02938	2.61241	4.2823	2.94125	3.03923	3.88958	2.92201	5.14733	5.05704	2.98771	3.82851	4.5809	2.89356	3.99543	5.47601	3.21576	2.91089	2.72138	3.79155
FHIT	2.13545	1.54584	1.83235	1.51752	2.30393	1.43714	1.33195	1.72528	1.52134	1.67182	1.00045	2.18043	1.15984	0.77422	1.42745	1.74659	0.909094	1.30811	1.52664	1.33227	2.01645	1.08558	1.95206	1.32384	2.08813	1.77093	1.92133	1.78141	0.794507	1.78099	1.79838	2.3888	1.49193	1.86308	0.722371	1.58324	2.11995	1.94139	1.99543	1.31907	1.88279	1.36894	1.50683	0.969711	1.04792	1.77535	1.13753	1.71123	1.8521
GPX2	26.7877	25.473	46.3775	55.2878	55.9733	26.617	63.1988	25.1813	42.5477	55.8558	57.271	43.8399	48.6519	23.7066	58.0444	58.9904	26.4272	25.267	55.425	50.4015	27.4771	51.6705	27.9588	46.1069	47.0871	39.1213	26.9618	55.3192	61.3549	56.7325	39.2727	58.3182	28.3332	25.3286	59.9962	24.1627	55.9418	51.6701	40.3603	62.1742	26.8832	53.5367	53.2281	62.7021	58.8741	49.7672	52.6034	47.7744	25.863
AGPAT1	14.6131	11.6444	14.2293	10.7272	12.0235	11.7297	12.6568	11.3462	6.42135	8.61947	10.4494	10.5946	11.8672	10.3392	10.3658	11.8082	10.931	10.796	13.2266	11.0431	11.2107	5.92945	11.5353	11.6648	13.4613	12.4652	12.8368	14.2474	14.2936	15.4462	11.5434	11.6438	12.0657	11.4089	9.39488	10.9394	12.1393	13.135	13.3345	9.79632	11.9635	11.7903	12.8561	9.91232	11.1967	12.3899	17.5745	11.3076	14.4432
POLR2G	17.9859	19.202	21.249	18.0372	16.0899	16.9483	21.9626	16.3265	23.2075	20.9758	20.2791	17.8974	20.6131	18.0439	21.1776	20.323	19.1164	16.6055	17.5338	20.5726	14.9584	20.0154	16.5376	22.6222	17.8689	15.831	19.082	17.5176	16.1181	18.8416	20.1806	18.7339	14.6076	15.5227	17.4137	19.6144	20.1165	21.7559	21.164	19.8067	17.9284	18.3798	18.7205	18.5429	18.4427	17.2634	17.4217	19.0572	18.228
PRPS2	13.3769	15.345	13.5873	13.2982	13.7714	13.4963	19.934	10.6712	20.5476	15.3614	15.5849	15.1424	17.0152	17.4391	16.2177	13.355	12.4534	7.98693	10.8016	16.8963	13.2673	15.2553	13.3207	18.4549	14.812	13.1794	13.348	16.135	13.0619	13.3714	15.4829	14.731	12.2279	13.761	18.3503	14.7584	15.2879	19.6947	21.5964	14.4999	12.7243	10.1701	14.9226	16.9108	17.0886	8.63604	13.2135	15.0321	17.6807
LDHD	8.38863	1.39605	4.44454	3.04006	7.69008	4.05198	7.87269	3.0477	1.70696	1.86023	0.0582879	2.76223	1.78899	1.39739	2.20828	0.179144	1.12769	2.8962	6.28255	1.43636	1.81178	2.35307	3.6181	4.30428	7.92898	3.29771	2.56229	0.361637	3.15964	5.66482	3.2919	8.42999	3.93037	4.91733	1.77098	4.40825	16.4088	8.54942	4.24384	1.12833	3.49845	4.49971	2.12909	7.63196	3.83603	4.52959	2.17762	2.47376	3.35892
PYGM	0.958851	0.616088	1.10264	0.834626	1.86328	0.942663	0.83591	1.54399	1.21402	0.945623	1.07214	0.931606	1.10351	0.869706	1.05736	1.12518	0.963682	1.35749	0.905057	1.03102	0.99392	0.963801	1.26479	0.643326	0.818895	1.21423	0.910023	0.715991	1.30668	0.825452	1.01051	1.45974	1.49526	0.928397	0.633621	1.08764	2.23234	1.10412	0.899021	0.785973	0.916816	0.890096	1.33102	1.14238	0.981766	1.08436	1.02885	1.01624	0.928253
SEPHS1	11.5669	7.95463	6.36505	8.69501	7.83834	7.7086	7.38639	8.22063	4.34849	3.21463	10.8813	8.44798	10.1277	9.38755	4.68844	9.34594	7.7946	7.85326	7.08375	7.91744	5.12432	8.73013	8.69416	10.4234	6.07328	9.50124	8.49836	8.28743	10.0892	9.05761	8.39034	7.83016	6.2855	7.59099	8.32669	8.82328	8.63372	9.79073	11.2969	8.05701	6.62051	8.40892	6.20005	11.11	12.7925	7.82963	10.5915	7.6177	10.4142
HAO1	0.855646	1.00743	0.699447	0.395282	0.657595	0.742477	0.472882	0.411413	0.647528	0.771341	0.503048	0.669953	0.684774	0.496108	0.803736	0.534179	0.67955	0.452229	0.720867	0.725916	0.632426	0.611271	0.811473	0.738234	0.621391	0.784796	0.583959	0.899542	0.829712	4.40023	0.777933	0.927695	0.834361	0.577887	0.530752	0.531339	1.16319	0.524403	0.780062	0.591706	0.815992	0.76628	0.645593	0.854042	0.764701	0.753581	0.976804	0.844395	0.535073
RPE65	0.613796	0.927699	-0.486507	0.702602	0.213338	0.91618	0.394503	0.40615	0.557843	0.854595	0.247765	0.259701	0.0270038	0.865896	0.0536996	0.301746	2.68661	0.341073	0.15951	1.17429	0.533191	0.598732	0.69614	1.0652	0.645774	0.893709	1.77162	0.688688	0.327062	0.316226	0.325383	1.28209	0.498266	0.17556	0.419227	1.47314	0.413204	0.555773	0.338864	0.540371	1.05251	0.230484	0.638375	0.883435	0.887962	1.72397	0.684339	0.54627	1.21744
HMGCL	10.7682	6.8789	9.46805	5.51221	11.441	8.56869	7.11488	7.30575	7.91201	7.01764	4.31304	7.76284	6.53656	8.51088	5.49908	6.84504	7.68412	7.23547	7.07289	4.82166	6.35402	6.41257	6.92087	7.05813	9.1531	7.16669	6.58489	9.01666	6.36063	6.44637	4.97905	8.74269	7.07416	6.81776	5.00231	7.64434	7.52931	5.86113	4.57868	6.64507	7.2619	5.39201	6.49855	3.92372	4.68207	7.92223	5.60227	7.18943	6.35554
NADK	12.9318	9.81245	13.6039	10.5906	15.2541	11.8017	11.321	7.41526	11.0349	8.0542	7.78188	12.2016	10.9168	9.76214	10.8041	13.8593	10.781	9.46126	12.2763	9.49688	10.02	11.5775	12.1745	12	17.4761	12.3319	13.3811	13.2257	14.8746	12.8953	8.93224	16.3641	10.4815	10.5134	8.96673	12.9346	9.55119	13.2084	13.9834	7.84821	10.0402	10.579	9.37824	6.15828	10.8475	8.81841	10.2892	10.6863	12.5141
PRDX6	72.0252	69.5001	74.681	70.4029	76.6707	71.7646	72.9509	71.3702	71.1221	71.4458	71.6614	73.3587	71.2584	74.538	73.279	73.6972	70.4437	71.1704	71.4329	72.6358	69.038	68.8136	70.5159	71.5378	70.4353	70.5697	71.1758	71.4051	72.1609	70.1029	69.3764	75.439	72.6686	72.3855	72.5743	72.6101	76.0676	73.4819	71.6764	74.084	71.0772	70.4888	68.6872	73.9297	73.3923	70.436	66.09	70.3677	69.272
POLR3H	7.35425	6.07256	6.80481	8.27443	12.0222	6.6069	7.73048	6.90284	7.55141	9.47906	8.95449	6.93915	9.32031	7.55299	9.62005	6.74106	5.24623	6.78385	10.8128	8.06565	6.93034	7.08721	5.69422	8.7243	6.97971	7.60897	7.35784	5.20583	6.54256	6.20202	8.1231	9.78999	8.16186	7.54804	5.86868	6.91126	9.20239	6.32017	5.42053	7.46283	6.54987	5.22126	5.9325	8.91747	8.22181	6.28778	4.64765	5.71099	8.57114
ADI1	18.3505	16.0486	19.4091	15.496	19.3305	14.3696	15.7774	14.2106	17.0272	14.8366	15.5481	18.4061	12.8277	13.3871	11.4096	16.8062	12.2253	16.3391	18.9567	17.8301	15.5655	16.8355	13.5379	17.0166	12.6165	17.0944	13.0075	17.6281	16.3357	17.1782	14.8888	18.9704	15.3669	17.1978	17.3341	15.5119	23.0589	17.9717	15.1351	13.803	16.1638	15.6068	9.83719	15.7267	16.5608	16.5962	12.0431	14.8186	15.3668
DGAT2	2.12487	1.97212	3.34535	1.50375	3.47436	2.55437	3.11181	1.62922	3.91328	4.57601	2.8268	4.05809	3.06031	2.88554	2.21842	5.32526	0.837357	0.944627	1.70721	1.31625	1.09749	1.15139	2.24629	3.49319	3.67087	2.72926	0.37781	2.4791	2.83102	1.57188	2.61174	1.96194	3.97477	2.38405	-0.105695	1.3458	5.15864	2.14934	3.29863	0.0650889	-0.83659	1.09242	-0.689543	2.92263	1.81023	1.40776	2.97112	1.52856	0.389956
AHCYL2	22.3627	20.7796	18.1718	16.4907	37.6079	21.1658	15.654	23.5073	15.7368	11.4665	21.6114	37.0623	21.7112	13.7248	13.5764	12.4185	20.0735	21.8422	31.8167	20.0779	24.2766	16.4085	19.2649	16.8041	19.7658	29.1558	23.166	27.2498	24.8837	30.4316	13.5072	37.2127	35.3346	30.0029	12.82	21.1443	30.3499	21.4394	10.5857	15.8833	27.9036	15.7091	14.9642	7.75746	17.643	21.7101	21.1074	21.5466	27.6515
DLD	10.454	8.09058	10.9971	10.1773	11.7548	9.75335	9.47645	9.65252	11.5393	11.0358	9.07801	9.84002	11.2949	13.6605	13.7095	12.2991	9.54643	9.20883	8.21362	10.0976	5.35505	9.6501	9.07373	11.9508	10.0622	10.609	10.3354	10.3718	6.88842	10.018	9.13361	11.2842	8.58008	10.6469	10.7377	9.45471	8.88968	13.5081	4.29706	11.7685	5.18902	9.69002	8.45394	11.9189	15.5556	8.91619	12.4576	9.65138	7.41754
ENPP1	1.35827	0.752887	1.36771	0.960928	1.00592	0.801033	0.784459	0.821442	0.738893	1.76414	0.570542	0.452675	0.590342	2.60906	1.00304	0.935906	1.43709	0.839875	1.41414	0.248191	0.804487	0.941412	1.93835	0.930715	1.83446	0.895256	1.18615	1.80972	1.44062	1.54767	0.730536	0.681975	0.735323	1.13474	0.818437	0.571903	1.4103	1.18638	1.83232	2.07311	0.909998	0.488824	0.852565	0.936603	1.77528	0.76292	2.90278	0.849281	1.19304
POLR2B	13.6287	11.2475	14.7969	11.7424	11.3332	12.0803	16.6634	11.4678	13.3787	13.2165	10.4393	12.4403	11.7125	11.2879	13.2591	12.3003	12.9664	11.2853	11.3842	13.364	11.8605	12.1388	11.9934	13.6294	13.075	11.3421	12.8933	11.8771	11.8352	12.4979	11.5364	11.8044	10.2678	12.2454	10.0387	12.0497	11.9816	10.3518	11.9501	12.0561	10.9094	12.1454	13.2848	16.4735	13.5096	12.357	11.2539	11.3528	12.8193
PDE6C	0.862296	0.799387	0.634186	0.68182	0.69522	0.789217	0.526268	0.656315	0.758326	0.695574	0.343767	0.695632	0.749927	0.679204	0.810795	0.49365	0.802815	0.771649	1.0362	0.613135	0.764629	0.570439	0.656176	0.561091	0.76044	0.559238	0.688226	0.702227	0.732294	0.952906	0.507714	1.01621	0.636368	0.919703	0.832084	0.805993	0.836874	0.942938	0.839143	0.571573	0.673262	0.693517	0.689798	0.637691	0.903434	0.680261	0.516089	0.901797	0.715563
GNPDA2	2.46589	2.95957	3.60538	1.7583	2.11267	2.58529	2.07464	3.10499	2.23775	3.14145	3.01335	3.40264	2.43914	2.70494	3.76642	2.42043	2.70011	2.28949	2.8586	2.30502	1.39615	2.32829	2.73704	2.78682	3.05388	2.94863	3.77862	3.02652	-0.254852	2.44327	3.53131	2.72197	2.21728	2.26826	0.804373	3.60362	3.14022	2.55582	2.95868	2.99418	3.02126	2.74544	2.30687	4.80327	1.87985	2.04592	2.66662	3.43399	2.37625
METTL2B	2.9446	4.55392	3.13425	1.38198	1.97756	3.60109	1.81779	2.90779	1.68842	1.23596	4.22737	1.92771	2.307	4.50799	2.87995	3.24147	3.57749	3.31361	2.80319	3.35281	2.62812	1.47839	4.29274	3.57472	2.28446	3.44401	3.59708	2.51315	2.43141	3.8181	3.90289	2.95402	1.52707	4.44955	3.65749	3.05439	2.96132	3.65739	2.04753	3.31951	3.42155	3.64361	2.70842	1.73099	4.59574	3.96987	6.74708	3.5317	2.83855
PLA2G15	9.37087	7.50484	8.7279	2.7429	4.05132	8.75427	3.0609	9.86321	2.63081	4.7145	2.88896	5.82834	5.8159	8.51991	4.36176	7.43902	5.53019	10.7922	8.91568	4.41276	8.34007	3.31523	10.433	5.04451	7.87782	7.10007	8.5591	8.7169	6.35799	7.25092	6.51317	4.89515	3.37231	8.20727	3.85365	9.92066	5.51391	6.14485	7.46156	8.07284	10.0002	4.97161	4.67913	3.7029	3.30884	9.37253	5.65894	8.91834	5.57802
UGP2	17.3868	15.9066	18.0694	16.01	13.9874	16.2973	15.0616	16.221	15.5968	16.1891	14.7934	14.3248	12.122	18.0926	15.6727	18.5584	13.5508	18.7447	17.7757	16.0311	17.5716	14.8468	16.9644	14.103	14.5415	16.7634	13.4017	15.7739	13.7886	16.5316	15.4538	14.6842	14.0339	17.1103	15.8904	15.2299	17.1418	16.6933	14.6489	16.8609	16.2733	15.8871	14.3867	15.3195	14.258	16.8419	20.6091	18.1877	14.794
DCT	0.747808	0.77299	0.867269	0.792833	0.871569	0.796509	0.778137	0.75056	0.836665	0.826022	0.789602	0.798405	0.83943	0.907695	0.809903	0.764801	0.77088	0.747825	0.79169	0.784963	0.856014	0.811317	0.806835	0.788744	0.794806	0.777592	0.763203	0.756175	0.825928	0.747653	0.773026	0.779173	0.854399	0.843505	0.808531	0.816279	0.840794	0.782933	0.755657	0.919034	0.781311	0.758686	0.800642	0.830219	0.83617	0.795279	0.764187	0.744332	0.777697
FMO1	1.70632	1.71186	1.71208	2.00126	0.379067	1.86768	1.26784	1.76108	1.11785	1.84355	2.91864	1.86137	1.84833	1.40896	2.23881	2.99617	2.01546	1.39963	2.48015	1.26045	1.49187	2.54953	2.83047	2.42119	1.93327	0.960277	2.9802	1.96382	1.76482	1.27563	3.60573	1.63775	0.184972	0.960604	1.22003	3.04928	1.39555	2.64192	2.37407	2.7197	1.10202	2.50194	3.14778	0.757985	2.52212	1.44366	1.82474	2.15035	2.46966
CBS	0.91333	1.27913	1.13695	0.929092	1.30613	0.937953	1.44642	0.967169	0.8748	1.04098	0.944816	1.10586	1.40711	1.50703	1.40429	0.986092	1.27461	1.18859	0.877358	1.27344	0.974561	0.951523	1.12794	1.36844	1.56003	0.771149	1.29188	1.07064	1.37702	1.01434	0.905005	1.26622	0.790662	0.828451	1.20274	1.01879	1.05984	1.12108	1.18812	1.12429	0.813635	0.988147	1.21138	1.16471	1.20214	1.05148	1.35442	0.716444	1.22921
PLD2	6.56872	4.66567	6.68904	6.71426	6.36627	5.12587	6.33589	5.03464	6.95383	5.67847	5.11504	6.53688	5.17856	6.23223	4.77552	5.91881	5.3394	6.57432	4.88886	3.23005	6.39157	5.36758	4.84672	6.34129	7.0284	5.0733	6.84858	5.87138	6.69619	5.29676	5.73604	5.63244	6.10312	6.10284	6.75874	4.21332	4.27714	3.20266	2.83953	4.4692	5.38353	7.06825	7.49846	3.75849	7.25778	5.98221	3.5606	5.19165	5.8695
FAH	3.84432	3.9166	5.0255	3.58136	5.54134	3.6794	3.76432	3.55357	4.64622	3.28311	2.92781	4.0047	3.6345	4.13514	7.67544	3.69069	2.91113	3.88238	5.86501	4.4909	4.27436	2.59989	3.10092	3.99513	4.91686	3.60809	4.10353	4.91955	4.58335	5.98996	4.08507	6.02138	4.85179	4.76921	6.01241	3.79362	4.44804	3.73043	3.69041	3.66583	7.03856	2.64311	3.47784	4.9455	4.65362	3.54096	0.909419	4.7808	3.34254
PLA2G12A	10.3255	6.15511	7.85034	3.63974	9.79458	7.45633	5.61237	6.34376	3.53039	7.57503	4.51639	8.14813	4.36799	5.87039	6.1629	7.67286	7.03275	5.53631	7.08495	4.34285	7.10601	3.9674	4.37176	7.99441	6.81186	5.32876	6.17928	6.77165	4.94408	6.80617	4.35707	8.08057	7.28792	4.8964	1.91073	5.99614	8.3799	6.13956	6.49765	5.36872	7.3477	6.49171	3.25586	2.81617	6.27587	5.32177	5.63607	5.32402	5.06078
NT5C2	8.28483	10.0097	8.94105	8.476	9.78553	10.1926	8.72909	9.0219	8.83286	8.09203	3.29463	9.72635	6.0252	9.19571	5.94295	6.9532	6.73315	9.20559	8.30471	6.63587	6.57212	8.83986	7.29646	5.33482	11.6664	9.79477	7.13016	7.12368	8.63938	8.74122	5.52081	8.64921	7.91696	10.3355	9.44409	7.4624	8.39184	7.05458	7.8013	4.93267	9.04535	6.03471	4.92159	6.30035	3.2693	7.01617	7.77681	8.45954	9.55479
MTHFD2L	3.10709	2.57306	0.711916	1.0582	1.39685	0.602442	1.60518	1.55371	0.901	1.35831	0.368895	1.15372	1.69585	-0.173714	1.39314	0.685081	1.04836	0.818456	0.652093	1.38125	1.34404	1.45025	1.442	1.75815	0.921235	1.1795	0.569169	1.1474	1.24355	3.7367	0.87144	1.69721	1.74763	0.930561	0.126709	0.808421	2.66728	1.14367	2.11017	1.625	1.39917	1.30053	1.42882	2.94843	2.10057	1.35405	1.78917	0.832655	0.830995
ADCY2	0.80212	0.673544	0.820691	0.860571	0.844726	0.759788	0.776269	0.807017	0.908522	0.877458	1.05544	0.771671	0.752938	0.675501	0.837188	0.717159	0.709769	0.709194	0.757399	1.18957	0.839829	0.784296	0.774518	0.997464	1.34343	0.874762	0.731212	0.692283	0.789798	0.741327	0.937791	0.990998	0.755022	0.826359	0.685772	0.6514	0.795898	0.740794	0.820502	0.951506	0.736396	0.699382	0.805331	1.04305	0.752233	1.09256	0.769239	0.748868	0.642614
PPAT	3.114	4.66338	5.33885	2.69809	1.76648	2.15216	3.17394	-0.917696	6.01617	4.06549	1.88231	4.60323	3.37465	5.76526	5.35241	4.66664	4.16708	0.312659	1.62655	4.09588	0.972863	3.72582	2.95531	4.49704	2.64199	1.46375	2.63259	2.19766	3.99302	2.70273	1.37619	2.70804	0.463	-0.238675	1.87571	3.38682	3.8018	2.61746	4.03458	3.74902	1.89405	3.96245	5.52505	7.99657	5.4756	3.05371	1.50997	3.30445	3.28649
POLR2K	22.1172	23.1197	18.5608	20.7441	24.5672	20.9452	23.1128	18.2688	21.6436	23.0723	18.7969	18.6916	22.3609	21.9315	21.6689	24.1735	21.4277	17.3618	18.7475	22.7141	21.3001	20.4061	21.8883	23.0334	16.4783	17.5895	20.5004	16.4048	21.6266	16.2816	20.8052	18.4907	16.0773	15.155	19.5208	20.8687	22.383	23.8899	18.7348	19.8157	18.6464	15.742	19.8054	19.8376	22.937	17.175	17.729	19.8979	17.8374
ACO2	12.406	11.6814	11.5928	13.1143	15.6245	8.83189	16.449	10.8778	14.7617	12.924	15.9306	12.3259	13.7871	12.5605	17.4695	12.6283	9.49567	10.791	11.5416	13.8941	11.4825	15.782	8.76442	14.4028	15.3895	14.9312	14.2049	9.55679	9.08261	10.1415	11.6398	11.3423	13.9044	10.0469	13.4809	12.573	15.7633	13.2991	11.424	13.2869	10.8679	12.6576	9.94086	18.3083	16.3521	13.7867	6.09366	11.1834	14.8961
LDHAL6A	1.41796	1.08353	1.20579	1.15248	0.732154	0.345029	0.686083	0.16061	1.11846	1.09988	0.68975	0.122798	0.443693	1.4348	0.921222	0.555081	1.20217	0.027006	0.116922	1.1216	0.880717	0.364672	0.805656	0.844664	1.49413	0.397351	-0.0424064	0.646573	1.04643	1.07939	-0.449753	0.774106	0.774871	0.557447	1.26398	0.433194	0.901799	0.954679	0.696347	0.964662	1.05621	1.18058	1.38787	1.12019	1.43851	1.20981	0.638489	0.79885	0.77485
PLA2G7	10.7227	9.87371	4.88749	8.46299	-4.86956	10.3269	4.86641	5.43672	0.952469	-2.76351	3.14468	11.5113	10.2294	6.89159	6.84792	11.1786	10.7345	5.98625	6.28935	11.0765	2.44494	7.4176	16.3501	7.65437	13.509	6.87005	14.0731	6.05617	16.4529	15.3135	11.7201	5.31433	3.45813	5.84798	4.07611	15.0447	1.57331	11.8004	12.8357	13.4071	9.26358	5.06267	2.27024	-3.09033	5.17819	2.82813	8.78029	11.7632	12.0109
PIP4K2C	13.8083	18.7	18.9667	14.7337	18.261	16.9035	16.2228	15.2764	15.5304	17.5029	17.2682	13.0948	18.428	16.1477	17.9957	18.2653	15.9238	13.0528	19.9911	17.1562	16.9865	17.1976	17.2897	19.3435	19.1285	13.7587	16.4936	18.0957	20.975	15.436	15.9831	17.8403	14.7504	16.2412	19.8954	17.7443	19.1565	19.4633	15.1827	16.0924	16.2948	20.6695	17.7022	17.6319	20.6766	17.0398	17.9116	15.1093	13.8955
HMOX1	22.3116	23.5478	15.2368	26.0559	21.7434	21.1634	13.6592	23.0767	21.0238	16.0368	21.9333	26.0746	28.5251	23.2467	27.6659	25.8419	26.0859	27.2448	25.9552	22.8357	35.3048	22.8082	28.9898	19.7331	30.5642	20.563	34.1357	27.979	15.7063	28.9628	22.5118	22.6791	19.1228	19.5258	21.8305	29.4738	22.2236	27.0487	25.2744	26.146	30.1683	24.7881	27.4702	12.6037	18.5879	27.9832	22.1447	28.433	26.8767
PCK2	7.23229	1.55556	7.52395	6.2449	9.77847	7.77253	15.5474	8.50828	6.01624	6.87603	9.094	7.92326	8.89249	7.0293	9.23642	5.35604	5.24812	9.66546	4.8579	6.12892	6.30654	6.65951	8.82722	10.8236	7.70872	6.22485	7.64022	6.88424	3.62901	7.22939	6.16969	5.20877	13.2072	7.18165	7.00669	10.1458	9.46569	7.37396	12.4119	10.6373	7.44436	6.72946	5.91353	9.3838	15.499	8.89559	4.90061	6.92817	6.97215
NME6	3.63217	4.51998	3.93449	3.12531	4.05237	4.15948	3.79957	3.76744	2.82581	3.39058	2.76435	3.74856	2.57451	3.38548	3.53225	3.84936	3.90978	3.59594	4.06827	3.4958	3.19963	2.48307	4.34013	3.38356	3.17335	4.32503	4.41393	3.68859	2.81602	4.19376	4.29773	4.28245	3.14033	4.68119	3.04307	4.32494	3.74518	3.64976	3.52564	3.05714	4.31918	3.53753	3.56642	2.79575	2.87334	3.32712	4.12084	4.14996	3.76648
DBH	1.1031	0.861594	0.787067	0.877956	1.71571	0.728966	1.0136	1.00693	0.960599	1.34883	1.09277	0.888595	1.23512	1.23039	1.1071	0.67581	0.849703	1.10418	1.01099	1.2368	1.13264	1.16712	1.22487	1.41679	1.1436	0.865092	0.720886	0.848231	1.30652	1.16374	1.20597	1.45191	1.19535	1.18226	0.591209	1.14019	1.11898	0.869954	0.836094	1.15261	1.36054	0.783007	1.06723	0.926164	1.1929	0.879328	1.09573	0.80052	0.900904
ALDH1B1	8.04527	14.8618	9.04333	10.1394	7.39613	3.98416	9.19744	5.64839	8.87173	4.75101	9.21225	13.3657	10.1088	11.3424	15.0378	12.0316	9.19421	1.90685	9.36446	5.52252	9.08705	10.849	10.0788	9.30806	10.4507	6.28494	12.7177	14.6052	5.91111	10.2626	17.6776	8.01594	8.75091	5.18237	5.68295	11.1098	13.7197	12.1219	11.7944	10.5629	9.46712	7.61189	13.1095	9.7741	11.9177	3.9332	5.47136	14.9228	8.87102
QPRT	25.0433	15.5531	27.0887	11.8971	15.4115	15.5323	-2.90232	9.37153	-5.34628	-0.703783	2.29056	4.76577	11.3763	16.13	3.00513	24.4501	16.5781	9.21674	9.06645	7.54345	6.66641	4.71309	10.8244	12.2255	24.5007	1.4351	10.5671	19.6967	19.6871	21.7462	12.75	15.0331	-0.236471	2.90805	-0.222538	10.1414	20.9656	21.513	10.4138	8.56066	1.09283	6.46717	8.23386	3.18876	1.99357	9.41009	10.636	9.93048	18.541
CNDP1	0.651068	0.735739	0.755247	0.869902	0.849908	0.819213	0.802824	0.728074	0.782905	0.891774	0.790233	0.76087	0.712031	0.77743	0.812724	0.744126	0.789244	0.74694	0.75448	0.799519	0.869375	0.806108	0.689726	0.78427	0.832426	0.763544	0.776833	0.776233	0.792022	0.719812	0.802936	0.851563	0.768789	0.795239	0.781665	0.817163	0.83515	0.940411	0.728977	0.76842	0.755468	0.690792	0.808158	0.819664	0.756169	0.78712	0.826889	0.741778	0.690049
ECHS1	47.0667	47.164	51.1646	48.1879	51.7756	46.3669	49.3606	47.2272	47.5148	49.6792	45.0461	48.9037	48.4739	50.5846	49.654	49.8455	47.1931	46.9551	48.3042	50.3165	45.2652	49.1291	47.7859	47.3077	51.7585	49.1565	46.5369	48.2808	49.2158	50.409	44.9461	51.4382	45.6685	47.4987	47.2893	48.4819	49.998	46.3535	50.247	45.3472	46.7089	46.81	45.427	46.407	45.2552	46.6889	48.2494	47.1247	47.0368
GUCY2D	1.40426	0.916435	1.22061	1.07253	2.65021	1.34091	1.01977	0.919066	1.02687	0.93049	0.802781	0.618251	0.974521	1.32299	0.607571	1.04407	0.633903	0.941837	1.40008	1.1918	1.61947	1.0521	1.30099	1.13148	0.612208	0.630662	1.1139	1.04596	1.83583	1.06825	0.944377	1.78703	1.21774	1.49285	0.978853	1.19118	1.85655	1.04414	0.908663	1.23212	1.39473	1.14178	0.929817	1.06549	1.48436	1.40963	1.46956	1.13132	1.20119
CKB	28.933	32.9936	39.7804	21.4466	23.1648	23.5043	31.0041	32.5759	24.0035	25.7401	29.698	31.2224	34.9917	23.7087	24.1556	4.99697	30.5675	28.6841	34.6156	29.7029	25.5682	27.8688	25.9326	26.2263	15.3646	24.4504	26.9821	33.093	29.0475	29.6037	14.1907	34.3898	32.5577	22.0911	11.713	18.8478	26.599	23.3083	18.3935	22.4079	15.036	16.681	28.5565	27.1456	26.9943	28.5797	16.4986	27.5373	29.1314
MIOX	0.343973	8.69664	2.94813	1.89975	4.87169	0.0749286	0.210728	-0.849407	0.64002	1.56086	1.94347	1.38544	0.512278	0.773298	1.97169	0.853969	1.11487	1.88269	-0.53402	1.05519	12.3432	0.376606	0.476818	1.4436	1.7718	0.570126	0.716086	0.540366	1.74325	0.0500407	0.277732	1.13242	0.251338	-0.191396	1.61994	1.20903	5.51976	0.226646	0.734743	-0.557753	0.727201	1.21473	1.11164	0.217882	0.137699	0.786371	0.348114	2.69486	0.627309
ALAS1	23.3406	22.041	26.0943	17.4426	20.1798	25.507	23.4375	24.8529	20.3429	21.0386	17.3427	22.424	21.3927	18.8565	20.5407	23.0177	20.3357	27.4204	23.4219	19.4118	25.2794	18	24.1961	20.3028	22.7163	27.0229	22.4658	21.1521	21.7724	20.3789	19.1531	23.6411	23.6232	26.9231	19.1567	26.6525	21.3897	27.0532	21.4662	19.7626	22.1634	15.242	17.899	19.8064	22.7262	22.8929	15.5611	21.6051	23.9171
HDC	2.58057	1.95072	1.08787	3.0462	1.40967	2.38421	1.26537	3.46415	1.71947	1.45703	2.50942	1.98597	2.3179	0.106195	0.872159	1.34548	2.59401	4.27291	2.76044	1.32612	1.98084	1.77457	1.09139	0.880694	1.04121	3.49151	2.92307	0.944817	0.643365	1.56865	3.41516	0.84042	1.05426	3.71909	1.8582	1.49371	1.76594	1.2256	0.190929	2.01734	2.23639	1.37505	1.11162	1.22471	0.768505	2.81656	0.704669	3.68835	1.25681
ITPA	15.5459	17.5762	14.4162	16.1733	14.0848	15.8368	17.9495	12.5666	15.6376	16.5834	15.0176	16.9568	15.014	13.8233	14.8747	15.6802	14.5204	13.8773	15.9808	16.9645	14.0928	15.1943	15.7488	15.7591	16.126	14.8809	15.6557	15.0029	14.9517	20.5619	14.9326	18.9369	14.7797	15.0906	14.6382	15.8491	18.5891	18.4346	14.482	15.7198	12.5817	14.6368	16.5751	20.5117	16.8703	17.2317	16.1574	16.7666	15.7649
[truncated: 258 more columns]
