# Supplementary material for: A model of twenty-three metabolic-related genes predicting overall survival for lung adenocarcinoma
Source: PeerJ. 2020 Sep 24;8:e10008. doi: 10.7717/peerj.10008 (PMC7520091; doi:10.7717/peerj.10008)
Supplement: Supplemental Information 8 [file peerj-08-10008-s008.xls]

## Sheet: Sheet1
id	HR	HR.95L	HR.95H	pvalue
PTGES	1.00719	1.00292	1.01149	0.00095517
POLR3G	1.2105	1.04936	1.39638	0.00876748
AKR1A1	0.984749	0.973248	0.996387	0.0103523
PRIM1	1.05793	1.01093	1.1071	0.0151428
NT5E	1.00983	1.00265	1.01706	0.00717644
CA4	0.815695	0.699775	0.950817	0.00919165
PTGIS	1.00789	1.00077	1.01506	0.0297609
P4HA1	1.01033	1.00357	1.01713	0.00268656
GMPS	1.07539	1.03865	1.11344	4.16553e-05
TK1	1.00833	1.00254	1.01415	0.0047487
POLE2	1.08117	1.00249	1.16603	0.0429153
MBOAT1	0.956079	0.91968	0.993918	0.0233295
TXNRD1	1.00216	1.00073	1.00359	0.00296094
FBP1	0.992864	0.987877	0.997877	0.00531599
PAICS	1.01654	1.0051	1.02812	0.00450777
POLA2	1.09841	1.02071	1.18203	0.0121573
GPD1L	0.965952	0.944815	0.987561	0.00214873
ADCY9	0.908435	0.846559	0.974833	0.00762719
LPGAT1	1.03777	1.01513	1.06091	0.000987281
ACSL1	0.984684	0.970055	0.999534	0.04328
B4GALT1	1.01119	1.00647	1.01592	3.04723e-06
GPD2	1.04208	1.00126	1.08456	0.0432202
MINPP1	1.05425	1.00337	1.10771	0.0363341
ATIC	1.01979	1.00191	1.038	0.0299394
MAOB	0.967511	0.937599	0.998378	0.0392798
MTHFD1L	1.0781	1.02527	1.13365	0.00335424
INPP4B	1.12214	1.03319	1.21874	0.00624039
NEU1	0.985612	0.972478	0.998924	0.0342431
GCLC	1.00603	1.00005	1.01205	0.0482772
ALDOA	1.00161	1.00046	1.00277	0.00592677
HAL	1.05539	1.01706	1.09516	0.00428409
CMAS	1.01017	1.00365	1.01673	0.00219648
ENTPD2	1.1193	1.06246	1.17919	2.25345e-05
TPI1	1.00286	1.00125	1.00447	0.000492552
NT5C3A	1.03184	1.00193	1.06263	0.0367314
PYGL	1.02325	1.00872	1.03798	0.00163214
GNPNAT1	1.04475	1.02872	1.06103	2.8607e-08
GSTA3	0.707653	0.502164	0.99723	0.0481757
INPP5A	0.915375	0.84144	0.995807	0.0396148
GPI	1.00912	1.00293	1.01536	0.00385077
ACP5	0.99199	0.984792	0.999241	0.0304323
PKM	1.00441	1.00218	1.00665	0.000106461
MTHFD1	1.07097	1.02306	1.12112	0.00332295
HK3	0.945752	0.90384	0.989608	0.0158799
PFKP	1.00853	1.00359	1.0135	0.000705371
ALDH2	0.97953	0.966187	0.993058	0.00312191
AK2	0.977583	0.960012	0.995476	0.0142894
AZIN2	0.763779	0.615658	0.947536	0.0142898
LDHA	1.00485	1.00323	1.00648	4.19688e-09
CAT	0.983433	0.971609	0.9954	0.00678845
CHPT1	1.0416	1.00814	1.07616	0.0144085
CDA	1.00502	1.00058	1.00947	0.0265731
RRM1	1.03029	1.01076	1.05019	0.00224618
SMS	1.01346	1.00658	1.02038	0.000118776
CTPS2	1.07872	1.01565	1.1457	0.0136888
ADSSL1	1.06329	1.01086	1.11845	0.017379
RRM2	1.02725	1.01238	1.04233	0.000300475
TYMS	1.02847	1.01352	1.04364	0.000171828
PPAT	1.05625	1.00881	1.10592	0.0196014
