# Supplementary material for: A model of twenty-three metabolic-related genes predicting overall survival for lung adenocarcinoma
Source: PeerJ. 2020 Sep 24;8:e10008. doi: 10.7717/peerj.10008 (PMC7520091; doi:10.7717/peerj.10008)
Supplement: Supplemental Information 10 [file peerj-08-10008-s010.xls]

## Sheet: Sheet1
id	futime	fustat	AKR1A1	NT5E	PTGIS	GMPS	MBOAT1	ADCY9	B4GALT1	MAOB	INPP4B	NEU1	ALDOA	ENTPD2	GNPNAT1	GSTA3	INPP5A	PKM	HK3	ALDH2	AK2	LDHA	CHPT1	SMS	CTPS2	TYMS	riskScore	risk
GSM748101	14.3836	1	30.2779	17.9285	6.41459	2.23862	6.14701	4.00173	49.0291	10.3222	4.35612	20.4307	143.507	0	5.79434	1.9609	5.22304	101.932	8.16163	20.6713	19.8477	88.6913	7.8015	26.1331	8.29084	4.15318	0.486094	low
GSM748138	3.12329	1	26.2372	12.8039	4.03629	4.6422	10.8226	5.90075	45.7991	1.08288	3.26386	19.5217	145.135	1.13099	10.1378	0.584162	4.72967	105.289	9.03535	15.0406	24.5485	89.3735	5.01704	20.9822	5.27152	5.62862	0.505652	low
GSM748167	10.1096	0	28.5358	23.1442	3.20633	4.2999	5.95175	7.42609	46.642	7.19578	1.47354	18.1998	140.171	0.544754	5.24299	0.537555	5.57387	95.4029	3.75518	22.7073	18.9686	85.4662	2.94312	22.5219	5.98239	2.74782	0.295384	low
GSM748162	7.31507	0	32.0008	16.9507	6.09749	4.74778	5.48346	7.48101	49.1236	6.39563	1.45188	21.3126	150.879	0.484893	8.1456	0.51957	3.24488	104.097	8.37071	19.7655	26.3499	89.0926	8.23781	17.71	3.62554	3.20756	0.297812	low
GSM748181	4.19178	0	28.5169	18.4514	5.62923	2.408	6.09135	6.43921	49.2665	6.81117	1.43382	14.5598	141.4	1.17077	0	1.45175	7.80051	93.6637	8.35893	25.0305	20.0264	86.0468	10.1042	21.5473	3.72507	0	0.0779689	low
GSM748068	7.15068	0	30.909	21.243	10.0497	6.77015	10.6236	6.73255	45.4669	4.66327	5.47324	22.891	147.778	0	8.3113	1.68452	4.87156	101.241	7.96407	22.5243	20.2451	88.0507	4.38111	23.4576	0	8.83234	0.198627	low
GSM748071	4.19178	0	27.6053	23.9152	5.84211	2.42292	5.31723	5.66716	44.6203	8.88396	3.31512	19.512	145.114	0.407708	8.97427	0.887653	6.73305	101.954	8.53798	22.3679	21.2909	89.1387	4.47255	20.4624	4.87766	2.37114	0.373952	low
GSM748055	7.06849	1	33.0428	16.1455	1.20527	3.47706	10.9541	8.35057	39.4483	7.06409	2.33708	27.0586	146.602	1.33158	6.23311	1.14416	3.83687	94.8465	4.40331	23.3315	19.0861	89.422	3.31127	21.0394	5.24799	8.51177	0.201751	low
GSM748075	2.79452	1	29.8376	28.9552	8.62592	4.46047	7.36315	4.85832	41.3665	5.59161	2.12894	20.1832	147.273	2.3009	6.19044	0.576682	5.9292	102.456	12.5591	20.7636	21.3968	89.534	1.73375	25.5467	3.80355	9.26526	0.407589	low
GSM748169	10.6027	0	30.9229	13.9308	8.57797	2.40974	7.12088	5.8429	45.3466	8.50035	3.35499	17.941	143.967	1.1186	3.51763	1.09816	6.46324	101.283	9.09787	23.2739	18.8263	86.26	7.94585	20.6485	4.14777	0	0.225568	low
GSM748186	1.80822	1	26.5488	23.8477	5.46071	6.88914	8.72781	3.82536	45.2939	4.15476	7.72898	14.2698	146.595	0.942199	7.15865	0.789995	2.12302	108.957	8.22602	16.4704	19.2756	88.2482	0.233445	24.0928	3.43762	7.96172	0.608583	low
GSM748111	2.05479	1	30.5845	5.30719	12.7518	5.19709	10.5502	3.95026	50.8404	5.06955	2.52963	22.6987	148.89	0.686303	12.1263	0.386172	6.31939	105.287	6.86357	18.4651	20.0943	88.7798	4.55329	26.7653	2.78138	6.90106	0.460641	low
GSM748102	16.6849	0	30.6875	11.3882	15.1561	5.15862	5.89231	3.99916	47.8534	6.70717	1.86148	18.7393	145.288	0.972019	8.04205	0.697199	5.30016	98.6365	6.12331	20.3503	21.1201	89.7143	6.78651	23.6073	4.20341	12.7793	0.651386	low
GSM748180	8.21918	0	31.6986	23.0536	1.50173	4.04513	8.07369	6.65517	43.8982	5.37381	1.07793	17.7346	142.845	1.00464	15.1801	1.11537	5.25917	96.2977	6.075	27.264	21.8411	86.9366	8.64981	20.5676	5.24757	2.17428	0.51873	low
GSM748064	9.69863	0	28.3313	21.4144	5.3593	4.76572	7.26893	5.54413	42.9983	7.49083	2.00119	19.0505	144.219	0.785038	11.4617	0.858204	7.74022	94.1093	6.07908	23.5332	20.7101	87.6999	4.91373	22.513	6.81945	1.42681	0.48694	low
GSM748057	16.0274	1	28.6242	2.40613	0	1.07581	1.55477	7.28141	46.321	10.2782	3.01024	19.9082	144.44	2.99365	5.56718	1.12343	7.16595	96.0093	2.72567	23.6343	21.479	86.7233	6.81441	19.0624	2.74873	0	0.270852	low
GSM748143	10.4384	1	28.4795	26.4957	5.00357	7.99527	7.69846	7.00185	52.1612	10.7872	1.25074	18.2553	147.179	0.421735	12.7236	1.10165	6.54553	98.8834	3.34475	20.6656	21.2441	88.968	1.91516	25.8525	6.47834	6.5254	0.427889	low
GSM748187	8.79452	1	34.9681	17.676	13.6864	3.55984	9.11217	5.80981	41.6636	7.19116	5.86708	18.8153	142.632	0.771655	8.16433	0.709819	2.44398	100.585	12.7803	21.1355	19.1299	88.2864	2.98117	20.4379	2.96737	8.00801	0.437766	low
GSM748116	3.28767	1	31.5973	18.6741	3.94091	5.34601	6.04846	5.33947	45.8196	3.58058	2.32488	22.6037	147.441	1.5607	10.9223	0.612073	7.24009	102.168	9.72435	15.7365	18.9628	90.3588	4.38931	27.6564	5.66774	3.73589	0.604704	low
GSM748243	8.46575	1	29.8943	22.1011	10.4035	2.56095	5.82593	7.21755	43.5052	5.79878	5.01661	22.2243	140.517	1.86135	11.4675	0.942054	4.82902	94.3041	4.43311	22.494	22.8602	88.8831	1.04132	22.6871	5.36993	0.0659033	0.592301	low
GSM748079	2.38356	1	32.5564	9.1059	13.9263	3.32614	6.21626	5.01379	49.217	7.02156	3.04411	19.2858	145.038	0.419642	7.48286	0.572598	4.94021	98.8833	8.35372	20.942	22.0386	88.6944	6.80723	21.9856	2.12337	7.56471	0.384078	low
GSM748123	0.986301	1	29.3819	10.4521	10.7751	6.00629	10.7267	5.69097	50.0117	6.89108	5.16643	18.1363	143.922	0.89844	10.0226	0.324583	5.30027	101.917	4.95055	20.3312	18.0405	88.1496	2.87214	23.0508	4.50556	10.4081	0.644721	low
GSM748166	5.34247	0	31.1131	15.629	14.6227	3.38184	7.1116	4.65946	48.1235	8.1408	3.1641	19.6732	145.557	1.45825	6.65448	1.00281	6.03824	99.5804	8.04012	21.4883	16.7907	88.6088	6.49035	23.4715	3.68961	8.3504	0.542743	low
GSM748094	8.87671	1	30.132	26.2196	2.23861	3.98673	9.42622	6.04594	45.3288	8.30089	1.00195	17.5661	146.436	0.54175	10.4881	0.4139	4.33656	103.623	13.6355	24.9305	19.5986	91.1538	2.61779	22.6247	6.93707	2.24084	0.296842	low
GSM748189	1.72603	1	32.4418	19.2536	9.84665	1.75597	6.37066	4.13699	53.8834	6.18032	3.89836	21.2786	146.764	1.61796	10.7031	0.525982	4.97374	102.722	12.2295	18.5045	18.7226	88.9046	5.0849	25.2811	2.76217	8.04474	0.62644	low
GSM748108	5.09589	0	30.4758	12.6388	10.885	4.03645	8.68618	6.60387	48.5863	7.58943	1.53032	16.1803	146.635	1.1978	7.62701	1.07541	5.17931	99.7907	11.8426	21.6279	21.3386	89.7377	5.35124	19.6484	2.8531	6.04881	0.198259	low
GSM748279	16.8493	0	29.3818	11.3901	8.79172	4.74321	12.12	4.51616	45.7322	3.07042	0.432906	21.7114	142.787	1.78442	11.0331	1.35821	7.93864	98.4324	5.42317	17.1964	19.8591	89.5637	0	26.0858	6.50585	11.7138	0.450202	low
GSM748091	6.90411	0	27.9734	1.05873	10.4326	8.25334	12.3069	3.6759	49.6298	4.83294	6.19432	16.0632	147.036	0.369445	9.01701	2.18047	3.30022	98.1919	8.5381	16.5218	17.7287	89.1011	2.70833	29.2126	6.57478	10.0466	0.5763	low
GSM748147	9.61644	0	27.0824	11.2729	2.30348	1.73002	8.81494	5.88923	51.3268	7.80263	2.07258	17.8507	144.421	0.523623	12.2226	1.48684	6.19524	99.5272	0	22.7718	23.3385	87.6373	11.6841	20.1427	6.33599	3.95906	0.552139	low
GSM748131	1.06849	1	26.8255	19.3047	1.38259	3.78709	7.30438	2.96924	44.4187	5.62328	2.88086	26.1958	146.522	0.301664	0	1.06128	3.64986	102.502	9.03581	22.7759	20.0872	89.3406	8.834	21.4052	2.90369	4.26859	0.115765	low
GSM748150	4.60274	0	27.4495	26.478	4.64131	2.71452	6.23382	4.95647	46.9135	9.3013	2.64866	19.6376	142.379	0.909661	6.28352	1.03679	7.18943	99.224	1.73772	22.6888	21.83	88.0951	5.1383	19.0679	3.95735	0	0.234355	low
GSM748053	9.94521	0	33.1836	22.2655	7.66843	1.95253	10.319	9.05011	50.5466	9.64134	4.76031	23.5087	141.286	0	8.90524	1.31911	6.01217	97.0153	3.49561	22.6221	20.4327	86.9053	5.91246	23.9317	6.93306	0	0.342011	low
GSM748135	14.3836	0	26.6564	15.3852	4.13053	3.4351	5.45288	4.30209	53.077	8.28344	0.992651	18.2201	146.819	0.511158	8.52647	0.838293	5.82417	106.327	0	29.7692	25.9273	89.8477	7.37449	17.0555	4.12393	1.05283	0.293752	low
GSM748087	8.30137	0	29.3989	26.089	2.33983	5.11502	7.18995	7.34044	42.773	7.64813	0.380856	14.1008	140.803	1.18744	4.92208	1.09745	5.6775	97.1086	9.78519	25.4121	19.6177	85.7236	6.38714	19.1472	3.69721	0	0.0491493	low
GSM748164	5.0137	0	27.1758	29.7343	5.90275	3.33369	6.18962	6.16306	47.5395	9.47764	1.5213	15.9674	141.563	1.10444	3.83035	1.13119	7.34987	98.723	3.83411	22.7928	20.8683	87.5083	5.88655	18.7863	4.39212	0.62634	0.183943	low
GSM748103	4.84932	0	29.4443	14.351	12.1602	3.86037	6.68984	6.36432	47.0084	8.62988	2.82321	19.1885	142.707	0	4.90451	1.49488	6.32391	98.1514	4.7645	20.9395	18.7284	87.6717	6.54453	22.4988	5.11116	0.663911	0.256553	low
GSM748152	14.5479	0	29.4066	10.7636	7.2379	2.10445	5.84682	4.45148	44.8439	6.72217	3.75025	24.2653	143.077	0.181978	7.71375	1.05944	7.44029	101.011	5.38838	20.1557	17.0089	87.3655	5.59898	26.085	6.68663	4.3573	0.550868	low
GSM748264	3.45205	1	27.2624	24.0577	4.24426	2.75708	7.45856	5.96257	43.7258	8.75175	4.829	18.5486	144.847	0.854545	9.03085	0.59966	7.8884	93.9262	2.29339	23.9231	17.3543	89.8624	7.35085	21.9563	5.81736	2.97428	0.648552	low
GSM748240	1.89041	1	29.1231	6.36678	7.37652	3.93149	11.8029	4.63109	47.5222	1.38215	3.50684	25.2377	145.45	1.33334	8.28201	2.64617	4.27326	101.289	5.50604	20.5322	20.4419	91.4609	3.62046	23.7418	6.23201	7.66435	0.409148	low
GSM1465989	18.1644	0	29.4463	32.3656	2.16596	3.5596	8.76036	6.89722	40.7079	10.2931	4.32236	15.3161	148.246	2.50907	9.89749	1.00219	3.23945	97.9081	1.53639	22.9449	20.8338	89.117	1.31514	21.5187	4.96372	2.27247	0.456288	low
GSM748188	8.13699	1	28.0499	14.5968	9.19015	4.44341	6.28897	4.54968	42.3645	5.20004	3.01228	23.297	145.151	0.524201	3.70075	0.8266	6.79001	97.1268	4.44279	23.1581	18.241	88.5743	5.87771	20.6481	5.06995	4.32152	0.417875	low
GSM748127	4.27397	1	28.9892	13.4362	12.5774	3.46082	7.47336	3.14943	47.9927	6.21633	3.6762	19.1214	146.884	1.33732	7.66495	1.50325	5.79356	101.866	8.33141	19.2619	18.4579	89.2113	3.45387	21.7604	2.27275	7.44893	0.391996	low
GSM748078	4.76712	0	29.7989	26.8168	3.99334	4.31615	8.50284	6.52192	47.0448	11.0396	2.06996	15.4769	141.063	1.13929	4.34006	1.52746	5.5806	98.9093	5.60476	24.9133	16.9745	86.5812	9.29916	20.9602	4.70447	0	0.198358	low
GSM748058	5.58904	0	32.5044	21.2273	4.81051	3.70939	8.35882	7.45882	44.2212	10.6731	2.03719	15.932	143.926	0.266443	6.99091	1.33819	6.11342	97.1634	10.244	25.1985	23.8164	87.6352	7.87778	22.7842	5.7959	0	0.0942748	low
GSM748142	8.13699	0	33.9413	28.2434	3.8941	2.95521	7.93436	9.08021	46.2371	10.1585	1.92739	21.4787	145.089	1.40536	8.79841	0.741983	6.43305	95.1655	6.78727	25.3174	22.3542	89.1148	7.73919	21.5155	7.68128	0	0.402836	low
GSM748089	2.05479	1	31.665	9.14988	15.004	4.18037	5.29683	4.45194	49.1469	8.23333	3.42984	18.1657	146.199	0	7.08253	0.339679	5.32136	96.0027	12.7212	23.7884	20.2606	88.209	5.99046	22.49	2.13758	7.32887	0.367579	low
GSM748092	9.53425	0	31.9006	11.454	3.15871	5.116	13.8901	3.24756	41.1382	5.12263	4.01088	19.6765	143.211	1.47299	10.0567	2.90179	4.10725	101.075	8.12303	21.3954	20.724	91.216	6.41824	30.0487	8.50154	11.683	0.551024	low
GSM748125	4.60274	0	30.3573	15.0529	7.34727	2.76713	12.1028	4.89164	42.4571	7.4745	6.77063	18.2326	145.325	1.27251	11.7016	3.05575	3.65239	101.679	9.92308	21.7626	15.6221	88.0351	9.49028	20.1116	3.7935	3.91952	0.490472	low
GSM748139	12.3288	1	30.9222	17.9182	6.16431	4.50792	3.74814	3.84652	48.3408	7.04851	0.895268	20.6919	145.689	2.01384	13.7486	0.375178	3.60566	99.533	8.91549	21.4982	24.3591	90.2447	5.90464	22.1439	2.37782	7.18362	0.574944	low
GSM748121	6.9863	0	28.2483	17.2632	7.96046	0.936547	7.91286	3.76418	45.721	7.26013	3.26707	19.6433	144.934	2.21639	11.6626	1.73636	5.78997	98.4404	6.93835	22.6009	20.5068	88.8116	7.7187	17.032	3.71971	4.35522	0.542754	low
GSM748171	1.06849	1	28.0845	13.2662	6.6719	2.74606	6.12384	7.99402	47.9869	7.14026	2.15016	22.535	144.772	0.514512	7.13443	0.892852	6.76381	98.1588	8.30211	23.314	20.067	87.4022	4.29638	24.0916	5.09834	6.89753	0.331562	low
GSM748146	1.47945	1	30.4805	23.4492	7.63704	4.22633	7.8847	3.36259	46.1707	6.38574	1.90974	16.647	146.497	2.34278	9.86356	0.797377	4.10668	99.6513	10.8985	19.8526	18.6746	89.6849	1.45351	23.4466	3.5023	7.41356	0.465777	low
GSM748090	7.23288	0	25.2906	14.6875	5.4582	1.75524	6.40926	5.85971	42.9752	7.02633	4.17729	19.7602	145.77	0.396781	11.5755	2.32973	6.34958	95.9989	7.0347	27.3636	16.0629	88.9258	9.34361	20.4663	5.79706	3.15641	0.597274	low
GSM748137	4.0274	0	25.6463	14.6919	9.74196	1.7587	6.40144	4.4787	51.0302	6.70843	3.6818	17.298	144.262	0.92986	5.62545	1.0875	6.18419	100.729	3.26256	23.6919	16.7685	88.0314	3.66964	21.8593	4.56457	3.36596	0.462433	low
GSM748085	7.31507	1	29.2705	2.7335	7.62246	1.67819	4.40323	4.44348	49.0139	8.95355	3.14727	16.0105	145.863	1.45104	10.9802	1.10176	7.01028	100.023	3.35165	25.3718	21.7668	88.4049	4.32647	19.9839	4.29358	2.56847	0.463984	low
GSM748086	10.7671	0	26.3558	28.331	2.52805	4.14385	7.03589	7.44107	50.3313	6.24878	0.640639	17.0647	144.279	0.830672	0	1.08354	5.2913	97.3185	3.88926	23.8941	23.3383	89.6327	0.761379	16.4283	5.01057	1.60701	-0.0688987	low
GSM748104	6.08219	1	30.3096	10.0169	4.28466	2.88754	8.69445	8.01059	44.2131	8.67765	1.42394	24.0384	144.738	0.645147	11.5275	0.856962	8.02675	96.7394	4.28241	23.5955	21.8101	86.7415	5.0012	23.6699	8.55514	1.76126	0.396879	low
GSM748175	11.0137	0	28.4996	12.5673	19.5827	6.09701	4.91242	7.38869	51.3471	7.02664	3.54633	19.1699	145.526	1.25753	5.61201	1.26096	5.94905	99.8578	12.1956	16.6669	15.8227	89.4816	3.67001	26.6609	3.05393	6.3455	0.472605	low
GSM748124	6.65753	0	31.8071	6.50186	10.5682	1.77303	6.87071	2.42954	47.5239	5.99052	5.65225	17.3479	144.141	1.29042	13.8256	1.05278	4.21238	96.6071	7.31848	24.386	19.3665	88.8303	4.6544	20.5194	5.358	6.25047	0.825732	high
GSM748185	14.3836	0	33.9403	8.88442	5.23306	4.88975	5.1643	1.58233	48.1717	10.4146	4.88763	17.0737	148.851	2.75939	16.5871	0.831632	4.56257	104.427	8.95727	20.7729	16.355	90.2216	5.32459	26.934	4.31363	9.82733	0.965082	high
GSM748173	1.15068	1	30.5045	25.7581	10.57	4.43554	7.38141	3.36537	48.8722	5.96733	6.06651	19.4092	147.32	0.580881	10.2693	0.583957	4.61658	104.094	8.2397	18.6034	20.1334	90.226	6.76865	24.3643	5.06347	1.27346	0.742635	high
GSM748083	0.657534	1	30.2497	22.154	8.33964	2.79163	5.6583	6.9427	44.8167	7.04809	4.40012	18.3124	148.738	4.37693	12.0735	0.70073	7.48662	100.675	4.25056	21.3061	19.3554	90.6952	9.94137	20.0163	6.48822	3.78782	1.10543	high
GSM748077	1.64384	1	31.5302	14.8243	13.2879	3.01296	6.55361	3.19736	46.7591	5.4769	6.56625	27.6544	145.855	1.6936	3.22296	1.93439	5.8467	101.282	6.45343	29.9857	19.7846	88.6729	10.9126	22.6208	4.92609	7.15762	0.695975	high
GSM748128	5.91781	0	29.5612	15.4733	11.6755	5.27104	5.52504	5.45989	49.1044	6.83997	3.25789	20.7435	144.664	1.33955	13.6418	1.21642	5.64746	96.4693	5.85928	22.5771	18.5065	87.3319	6.12189	24.674	5.3657	4.41721	0.768259	high
GSM748278	1.89041	1	29.9995	11.8489	18.189	2.50213	4.44664	4.32006	53.5171	6.03961	4.13765	18.5277	145.857	2.59458	12.6517	0.505039	5.13711	98.52	4.40133	19.3501	20.1589	90.2645	2.30767	20.7686	5.70602	5.32543	0.975561	high
GSM748161	14.3836	1	27.5248	10.9062	15.0122	4.97455	9.12034	5.20316	44.7409	5.39666	3.85238	21.507	146.293	0.429707	10.2335	1.44108	5.28156	101.561	9.75867	25.1462	18.341	89.1858	10.2725	25.9076	6.35297	4.18761	0.706571	high
GSM748100	3.78082	1	24.8296	12.8253	3.91059	8.18633	9.34754	4.89335	42.5159	2.07659	3.76732	23.1259	143.37	1.11773	11.7695	1.49213	2.98581	98.6269	5.93208	14.0919	15.2401	88.6449	8.12251	25.429	7.40874	2.76969	0.827887	high
GSM748080	5.26027	0	31.3402	17.2827	14.1516	3.71513	8.16671	4.55408	45.1171	9.50643	4.4191	20.4864	148.217	1.75855	10.4098	1.83201	7.19035	102.503	6.30343	23.3488	19.5626	90.3391	7.39872	22.442	6.52495	7.25603	0.723512	high
GSM748170	0.164384	1	30.189	24.4415	9.40739	5.84118	7.14218	3.70055	41.1837	7.56901	3.98327	22.4222	148.682	1.41878	9.63041	0.580187	4.19442	100.602	6.50001	22.1738	16.347	90.2177	8.4937	24.5188	6.65992	5.09869	0.873961	high
GSM748242	1.39726	1	32.4395	21.4002	10.0991	8.3946	5.34556	4.54098	51.1083	6.03085	4.17672	20.6903	143.951	1.08786	11.313	1.22779	9.13907	96.2779	3.96918	19.8478	20.3596	88.7711	4.33098	29.7236	9.77134	9.31241	0.993376	high
GSM748157	11.2603	0	28.8022	22.744	0.221209	3.12043	6.2133	8.14212	48.6622	2.91064	5.09634	18.1963	146.64	2.10054	7.80321	0.572871	7.50659	98.6358	3.44671	25.6164	23.401	88.9698	9.21469	22.005	6.87868	0.162319	0.759839	high
GSM748140	2.30137	1	24.0911	7.57715	10.9203	8.08821	9.14581	2.11691	50.0563	7.5463	3.81532	20.8088	149.07	2.34026	10.4036	0.954007	6.19117	100.522	1.83659	22.4452	22.2708	88.4745	3.79892	22.3366	6.22564	8.11216	0.757704	high
GSM748122	9.28767	0	28.6952	12.7003	6.68484	2.60754	7.09063	3.4058	48.6782	8.11275	4.95411	14.8802	148.154	2.3313	13.7455	0.981797	7.02095	101.526	2.48221	23.1581	13.832	88.6078	13.3089	22.6352	6.78209	0	1.10059	high
GSM748277	15.863	1	26.3353	17.466	1.26359	2.10214	7.44395	3.14878	46.3142	1.36044	6.2883	17.2186	147.88	2.09672	14.98	0.259697	7.40351	95.5384	1.7887	20.373	14.8925	89.7768	7.28144	25.5899	5.97097	9.80167	1.28197	high
GSM748179	0.90411	1	24.9503	35.4033	0	5.67822	9.12362	3.08171	47.8473	0	6.49384	19.3418	147.348	1.01398	15.9516	0.789575	1.58323	108.482	5.43737	14.7029	22.3991	91.431	2.57638	29.2736	5.73896	14.2745	1.12935	high
GSM748276	4.52055	1	29.1015	27.8633	15.0802	5.63813	9.99317	3.68075	46.9257	7.3499	8.28089	20.9338	145.6	1.68454	8.88684	0.0863426	4.21475	96.6919	6.5792	14.9067	23.2951	90.299	6.15703	24.2991	3.97796	8.92426	0.898822	high
GSM748126	5.67123	0	29.5237	20.6603	8.92519	1.8529	6.71477	5.07341	44.1746	4.46452	6.99488	20.2096	146.23	1.12507	11.3715	1.28781	6.15779	101.068	5.98731	24.1109	18.6174	90.3907	7.3204	22.079	6.83467	1.94115	0.910226	high
GSM748054	1.72603	1	28.9918	27.2499	9.61192	4.00897	10.6146	4.68397	44.7301	5.23242	7.38963	22.7833	140.748	0	9.01444	0.563154	6.15288	96.1976	5.07502	15.5915	19.6063	89.5387	2.70332	24.9178	7.11973	5.51909	0.725822	high
GSM748271	1.89041	1	31.5863	23.7277	16.5593	6.28294	5.94929	3.96823	45.8733	9.29631	0	19.2121	144.154	3.91077	14.1527	1.09681	6.03602	94.5473	1.42385	19.5482	17.3859	91.6644	11.5329	27.7373	11.2651	7.47597	1.37857	high
GSM748113	7.39726	1	24.4278	10.3636	3.34575	9.26144	15.1942	2.63757	50.2554	7.732	5.2725	19.2491	148.096	0.521734	10.9275	0.700778	6.62156	101.419	1.18255	23.4849	24.5177	88.2301	5.9285	24.1657	7.82933	15.6294	0.742375	high
GSM748130	1.15068	1	34.0398	21.2405	1.33129	0.568679	8.56551	1.75169	43.674	5.36193	4.50164	10.9643	143.767	1.19016	9.43129	1.18832	5.61629	100.911	7.19473	26.7154	15.1763	88.0436	13.0841	24.016	5.2765	1.64122	0.725128	high
GSM748239	0.328767	1	27.2593	34.4357	3.20291	4.88693	4.57511	4.45934	40.4306	1.43033	4.21017	15.3765	148.247	1.28075	16.9663	0.401995	7.23664	102.516	6.77108	13.4037	20.9629	91.4389	7.34998	30.332	3.34411	9.95451	1.07055	high
GSM748081	8.38356	0	24.5823	22.4517	2.83898	6.43144	10.5631	1.48356	41.4934	5.90802	5.19996	16.6788	147.696	1.58111	11.6773	1.38278	3.8676	105.835	0.798803	17.5312	15.0984	89.8388	8.81622	22.7338	5.65572	7.88413	0.93961	high
