# Supplementary material for: A model of twenty-three metabolic-related genes predicting overall survival for lung adenocarcinoma
Source: PeerJ. 2020 Sep 24;8:e10008. doi: 10.7717/peerj.10008 (PMC7520091; doi:10.7717/peerj.10008)
Supplement: Supplemental Information 11 [file peerj-08-10008-s011.xls]

## Sheet: Sheet1
id	futime	fustat	ADCY9	AK2	AKR1A1	ALDH2	ALDOA	B4GALT1	CHPT1	CTPS2	ENTPD2	GMPS	GNPNAT1	GSTA3	HK3	INPP4B	LDHA	MAOB	MBOAT1	NEU1	NT5E	PKM	PTGIS	SMS	TYMS	riskScore	risk
GSM1855209	2.65205	1	-0.0550674	-0.0977988	-0.0462022	-0.000987365	0.00749311	0.0105718	0.163871	0.349477	0.298228	0.0178977	0.284012	-0.164099	-0.0127021	0.131359	0.0158352	-0.120868	6.39777	-0.0121533	0.0182676	0.00842873	0.0722346	0.00925715	0.145867	7.42069	low
GSM1854841	2	0	-0.0584026	-0.104491	-0.0471231	-0.00081096	0.00795777	0.0185291	0.146998	0.34759	0.375104	0.0201682	0.293014	-0.1607	-0.017238	0.169415	0.0203229	-0.0726559	7.41932	-0.0133486	0.0214035	0.00895477	0.0535884	0.00950393	0.134393	8.57149	low
GSM1855118	0.147945	0	-0.0565353	-0.106903	-0.0512737	-0.000984301	0.00800871	0.0160565	0.158681	0.338441	0.350771	0.0202545	0.300034	-0.424168	-0.0198521	0.220306	0.0221775	-0.103069	7.91897	-0.0155936	0.0178504	0.00893973	0.0820449	0.00954733	0.142298	8.83601	low
GSM1855100	2.37808	0	-0.0526772	-0.11389	-0.0508343	-0.0011541	0.00792162	0.0154075	0.144433	0.337058	0.273317	0.0166877	0.291895	-0.170885	-0.0188543	0.210389	0.0206194	-0.117659	8.0904	-0.014884	0.017303	0.00956007	0.0847633	0.00956996	0.128453	9.11694	low
GSM1855084	2.51781	0	-0.058602	-0.105478	-0.0493421	-0.00112651	0.00761006	0.0155444	0.180086	0.350354	0.196701	0.0180642	0.286936	-0.164402	-0.0177052	0.149367	0.0198999	-0.121984	8.542	-0.0133272	0.0175752	0.00924059	0.0657994	0.00945664	0.123796	9.46047	low
GSM1855034	2.21644	0	-0.0651057	-0.106031	-0.049291	-0.00112313	0.00777013	0.0152862	0.177796	0.350207	0.254984	0.0163945	0.257749	-0.207119	-0.0216211	0.155623	0.0190332	-0.136629	8.64884	-0.0141811	0.0191353	0.00939279	0.0737153	0.00896641	0.140142	9.55394	low
GSM1854995	1.3589	1	-0.0612266	-0.105614	-0.0500801	-0.00100674	0.00788665	0.0161753	0.156636	0.358593	0.385198	0.0180863	0.301117	-0.161594	-0.0211891	0.187115	0.0209852	-0.0982417	8.36424	-0.013863	0.0193014	0.00914364	0.08866	0.00975988	0.13298	9.56306	low
GSM1855048	1.7863	1	-0.0577742	-0.123818	-0.0484132	-0.0010414	0.00758469	0.0135624	0.146498	0.366316	0.248803	0.0166129	0.296544	-0.2078	-0.0143296	0.145482	0.0196991	-0.113118	8.66295	-0.0130582	0.0180792	0.00934713	0.0574813	0.00955238	0.129025	9.56818	low
GSM1854832	3.0411	0	-0.0681265	-0.114744	-0.0508744	-0.00113991	0.00771673	0.0146944	0.164274	0.34659	0.24898	0.0175746	0.276544	-0.451449	-0.0219189	0.142743	0.0199398	-0.115652	8.95505	-0.0146509	0.0214858	0.00892243	0.0719983	0.00942877	0.122495	9.58988	low
GSM1854895	0.857534	1	-0.0564079	-0.10851	-0.0495913	-0.00106938	0.0078047	0.0187556	0.156627	0.345593	0.252431	0.0192142	0.308535	-0.214997	-0.0192044	0.236331	0.021384	-0.128206	8.55488	-0.0133939	0.022552	0.0093433	0.0926468	0.00946076	0.138582	9.60276	low
GSM1855099	2.51233	1	-0.063511	-0.11415	-0.0484261	-0.00113029	0.00773478	0.0151567	0.165833	0.353066	0.249929	0.0175542	0.251763	-0.388505	-0.019583	0.184119	0.0196216	-0.110273	8.86851	-0.0148931	0.0233023	0.00932841	0.0695727	0.00918922	0.123038	9.60724	low
GSM1855004	2.81918	0	-0.0620546	-0.106521	-0.0500436	-0.00109402	0.00788176	0.0162781	0.165483	0.338539	0.265282	0.0182309	0.270901	-0.148066	-0.0208917	0.214111	0.0203947	-0.126159	8.59825	-0.0145359	0.0212014	0.00926559	0.094884	0.00941901	0.129676	9.65043	low
GSM1855078	2.41644	0	-0.0549424	-0.114594	-0.0503198	-0.00105759	0.00772591	0.0142525	0.159782	0.36537	0.278695	0.0183774	0.302008	-0.185727	-0.021266	0.176652	0.0210635	-0.100632	8.6943	-0.0149974	0.0189699	0.00926118	0.0799694	0.00980108	0.144131	9.75682	low
GSM1855165	1.48219	1	-0.0608759	-0.123316	-0.0489796	-0.00104465	0.00774727	0.0147588	0.152028	0.362039	0.24979	0.0182196	0.28425	-0.207657	-0.0180652	0.158562	0.0202254	-0.11695	8.88909	-0.0148579	0.0238414	0.00934989	0.0721625	0.00940505	0.134943	9.81467	low
GSM1854975	2.49589	0	-0.0520297	-0.105117	-0.0492972	-0.00100062	0.00750489	0.0154814	0.170787	0.347067	0.314506	0.0188908	0.313202	-0.207154	-0.019871	0.170911	0.020949	-0.095775	8.71537	-0.0135488	0.0191895	0.00902003	0.0805439	0.0102046	0.145003	9.81483	low
GSM1854907	2.93151	0	-0.0628844	-0.118862	-0.0506612	-0.00111571	0.00768636	0.0163205	0.162114	0.362352	0.242291	0.0172491	0.294794	-0.244278	-0.0199472	0.15891	0.0204131	-0.119428	8.95758	-0.0142624	0.0149028	0.00914999	0.0839904	0.00956512	0.118667	9.84454	low
GSM1854876	2.48493	0	-0.0541712	-0.102751	-0.0486281	-0.00106819	0.00788694	0.0141493	0.166226	0.358574	0.476642	0.0185013	0.309812	-0.275037	-0.0216823	0.219404	0.0201905	-0.0986683	8.69826	-0.013764	0.0172567	0.00914541	0.0857186	0.00965883	0.132864	9.92852	low
GSM1854883	2.94247	1	-0.056665	-0.107855	-0.0526101	-0.00113333	0.00783105	0.0136961	0.193861	0.347387	0.224626	0.0190319	0.268936	-0.174867	-0.0172591	0.1487	0.0200146	-0.0646108	8.95251	-0.0120545	0.0142239	0.00912028	0.0572561	0.0100776	0.139422	9.93963	low
GSM1854822	3.8411	0	-0.0646487	-0.122847	-0.0510174	-0.00111086	0.00779644	0.0151052	0.155181	0.391556	0.236142	0.0173325	0.290248	-0.20125	-0.0188528	0.150895	0.020203	-0.112239	9.01732	-0.0153212	0.0214786	0.00907327	0.0735756	0.00960841	0.127411	9.95564	low
GSM1855108	2.51507	0	-0.0550319	-0.108023	-0.0474599	-0.000992855	0.0077905	0.0140403	0.150071	0.368661	0.326766	0.0182677	0.309694	-0.195112	-0.0199355	0.239967	0.0209462	-0.107209	8.78501	-0.0130348	0.0214671	0.00931002	0.0811218	0.00995887	0.143558	9.95983	low
GSM1855231	1.33973	1	-0.0568789	-0.112487	-0.0488749	-0.00104255	0.00749182	0.014077	0.160571	0.360636	0.217498	0.0187716	0.293995	-0.176595	-0.0174563	0.19628	0.020551	-0.118009	8.96587	-0.0149941	0.0169206	0.00906073	0.0906653	0.00979474	0.142687	9.97853	low
GSM1855009	2.07123	0	-0.0556822	-0.108065	-0.0492214	-0.00105296	0.00790705	0.0150727	0.142162	0.378022	0.231328	0.0198094	0.287092	-0.161436	-0.020728	0.220307	0.0210262	-0.120127	9.00889	-0.0148103	0.0164422	0.00895956	0.0915348	0.00975918	0.139654	10.0668	low
GSM1854963	0.0958904	1	-0.0544074	-0.101877	-0.0487912	-0.000940034	0.00778	0.0162303	0.156515	0.339561	0.232096	0.0190862	0.301603	-0.170438	-0.0205029	0.284031	0.021481	-0.124806	8.98632	-0.0132559	0.0274601	0.00963059	0.0742747	0.010351	0.132073	10.0835	low
GSM1855178	0.158904	1	-0.0453561	-0.105802	-0.0489183	-0.000915076	0.00770966	0.0151636	0.157007	0.33899	0.403382	0.018036	0.297734	-0.239525	-0.016899	0.248292	0.0215956	-0.094718	8.92094	-0.0136053	0.0238842	0.00937756	0.0685563	0.00956705	0.13893	10.1134	low
GSM1854971	1.33973	0	-0.0591493	-0.107297	-0.0499592	-0.0010741	0.00751987	0.0143546	0.164251	0.331735	0.236469	0.0181074	0.283321	-0.394855	-0.0206775	0.194808	0.0206077	-0.120904	9.36374	-0.0138093	0.0200061	0.00897822	0.0859828	0.00957487	0.134373	10.1261	low
GSM1855131	1.90685	1	-0.0611269	-0.113913	-0.0481688	-0.00096972	0.0076196	0.0141422	0.161923	0.327662	0.249328	0.019066	0.291338	-0.347758	-0.0172103	0.150756	0.0205903	-0.111063	9.35381	-0.0142568	0.0205804	0.00934811	0.0804614	0.00872301	0.133406	10.1343	low
GSM1855187	2.49863	1	-0.0641518	-0.110245	-0.0486939	-0.00109248	0.00753405	0.0147955	0.18	0.364281	0.219775	0.0152737	0.29331	-0.177132	-0.0156581	0.19844	0.0203344	-0.118179	9.14636	-0.0146262	0.0224848	0.00929822	0.0622455	0.00929426	0.127573	10.1412	low
GSM1854925	0.734247	0	-0.0593261	-0.107927	-0.0486425	-0.00114515	0.00793587	0.0158002	0.171097	0.341036	0.24333	0.01674	0.29888	-0.178574	-0.0204791	0.202849	0.0209533	-0.120486	9.14331	-0.0146296	0.0201	0.00924833	0.0796443	0.00935557	0.137263	10.1663	low
GSM1855031	2.83014	0	-0.0552461	-0.107916	-0.0502551	-0.00105897	0.00755154	0.0142464	0.163445	0.332873	0.224075	0.0186541	0.277018	-0.330649	-0.0245669	0.222014	0.0185662	-0.129531	9.34626	-0.0147806	0.0198194	0.00881269	0.0904744	0.00975271	0.126929	10.1665	low
GSM1855150	0.268493	1	-0.05561	-0.114251	-0.049742	-0.000888406	0.00757887	0.0155893	0.154187	0.356391	0.30588	0.0186866	0.296196	-0.153691	-0.018336	0.206182	0.0203213	-0.110263	9.04507	-0.014726	0.0188947	0.00901439	0.0857727	0.00938564	0.13864	10.1703	low
GSM1854953	4.87397	0	-0.0598661	-0.102937	-0.0484188	-0.00107363	0.00749556	0.0156503	0.160019	0.348492	0.230669	0.0171879	0.278112	-0.169723	-0.0172494	0.159367	0.0198765	-0.127083	9.24952	-0.0141346	0.0152487	0.00873802	0.0706102	0.00919076	0.128197	10.1779	low
GSM1854846	2.28219	0	-0.0590484	-0.120442	-0.0477256	-0.00112889	0.00764475	0.0161236	0.17936	0.35427	0.279121	0.018003	0.281529	-0.375984	-0.0194023	0.189854	0.020905	-0.113841	9.33844	-0.0136499	0.018109	0.00929491	0.0745487	0.00938682	0.13337	10.1787	low
GSM1854972	2.51781	0	-0.0661551	-0.111714	-0.0492778	-0.00110439	0.00753199	0.0154048	0.164344	0.342865	0.26837	0.0176778	0.275718	-0.411354	-0.0211328	0.153316	0.0200263	-0.132403	9.48409	-0.014381	0.0226498	0.00900425	0.0823708	0.00948432	0.128959	10.1943	low
GSM1854817	0.813699	0	-0.0530851	-0.107402	-0.0433597	-0.00113001	0.00750423	0.0150447	0.163519	0.359631	0.252832	0.0189179	0.282783	-0.208239	-0.0192928	0.232499	0.0186658	-0.10339	9.1727	-0.0131194	0.016348	0.00851771	0.0589459	0.00961207	0.130134	10.1986	low
GSM1854940	2.59452	0	-0.0637338	-0.113478	-0.0492977	-0.00106523	0.00761448	0.015776	0.159808	0.369017	0.218631	0.0182779	0.277772	-0.331802	-0.0219093	0.191942	0.0197778	-0.118166	9.42122	-0.014673	0.0223875	0.00915454	0.0789752	0.00948634	0.136558	10.2423	low
GSM1854889	1.04932	1	-0.0606591	-0.113798	-0.0491309	-0.00108271	0.00770887	0.0148032	0.16481	0.341037	0.289433	0.0180922	0.28171	-0.382372	-0.0210634	0.207577	0.0199798	-0.115878	9.40064	-0.0156306	0.0175692	0.00915964	0.0864678	0.00959443	0.140829	10.2498	low
GSM1855147	2.21096	0	-0.0569179	-0.111132	-0.0514411	-0.00101902	0.00768266	0.0155924	0.150416	0.338643	0.332849	0.0184024	0.276997	-0.25705	-0.0213728	0.225071	0.0210056	-0.125372	9.25661	-0.0143089	0.0233573	0.0093112	0.0859763	0.00909375	0.132354	10.2648	low
GSM1854965	1.86301	1	-0.0610365	-0.109739	-0.0496169	-0.000998619	0.0077914	0.0145998	0.126644	0.369154	0.214363	0.0182323	0.302168	-0.156364	-0.0242152	0.21992	0.021706	-0.111332	9.23514	-0.0145888	0.021483	0.0093826	0.0880956	0.0103483	0.145669	10.2768	low
GSM1855088	1.28219	0	-0.0615621	-0.114838	-0.0490222	-0.00109847	0.00763365	0.0140008	0.156156	0.344405	0.293864	0.018355	0.236813	-0.507574	-0.0191299	0.196556	0.0183854	-0.122091	9.63328	-0.0147157	0.0213389	0.00922599	0.0610139	0.00983583	0.147134	10.278	low
GSM1855026	2.84384	0	-0.0506139	-0.109292	-0.0516311	-0.00105563	0.00778438	0.0148869	0.151877	0.300878	0.277068	0.0190202	0.293953	-0.17026	-0.0240938	0.168289	0.0203922	-0.11406	9.31518	-0.0143949	0.0160447	0.00900189	0.0823837	0.00915703	0.134388	10.2849	low
GSM1854948	0.849315	1	-0.0614856	-0.107378	-0.0474561	-0.00110645	0.00777286	0.0160688	0.167659	0.360856	0.250716	0.0166655	0.282091	-0.194861	-0.0210948	0.214601	0.0201467	-0.120086	9.29768	-0.0129855	0.018997	0.00932737	0.0708861	0.00927455	0.117175	10.2935	low
GSM1854996	1.78356	1	-0.0591855	-0.113986	-0.0495492	-0.00110325	0.00787972	0.0139265	0.156392	0.332583	0.223508	0.0186591	0.292698	-0.194571	-0.0195568	0.14704	0.0201732	-0.120127	9.4247	-0.015702	0.0168051	0.00953012	0.0659255	0.00955363	0.134761	10.3003	low
GSM1854969	0.975342	0	-0.0653578	-0.112942	-0.0490949	-0.000963941	0.00797475	0.0153589	0.159427	0.34216	0.276273	0.0198535	0.291782	-0.221114	-0.0168291	0.163309	0.0204411	-0.100153	9.35489	-0.0143018	0.0146496	0.00907123	0.059635	0.00963647	0.137304	10.301	low
GSM1855179	0.0136986	0	-0.0538699	-0.105886	-0.0498929	-0.000969432	0.00789279	0.014906	0.17043	0.358074	0.34307	0.0179642	0.301814	-0.164469	-0.0190297	0.210257	0.0211338	-0.112993	9.13505	-0.0140406	0.0202414	0.00926186	0.0893623	0.00992834	0.126749	10.315	low
GSM1855001	1.33425	1	-0.0532307	-0.117523	-0.0505842	-0.00103726	0.00777994	0.0144598	0.152751	0.349252	0.257453	0.0181188	0.300856	-0.193608	-0.0201288	0.20442	0.0204624	-0.118471	9.29613	-0.0148678	0.0172099	0.00940906	0.0905391	0.00962168	0.14367	10.3227	low
GSM1855158	1.91233	0	-0.0590343	-0.114235	-0.0480481	-0.00112012	0.00775126	0.0117992	0.141072	0.361776	0.245631	0.0172706	0.258144	-0.169998	-0.0215736	0.151453	0.0198079	-0.103458	9.40627	-0.0151211	0.019472	0.0091383	0.0773736	0.0093031	0.135481	10.3392	low
GSM1854801	2.45205	0	-0.0640739	-0.109698	-0.0510006	-0.00109723	0.00757447	0.0149396	0.157365	0.370277	0.236211	0.0186647	0.283427	-0.437825	-0.0228199	0.152014	0.020465	-0.124273	9.66792	-0.013996	0.0238622	0.00918543	0.063537	0.0098871	0.141045	10.3516	low
GSM1854950	2.39452	0	-0.0615272	-0.106799	-0.0492638	-0.00107848	0.00744732	0.0150127	0.161782	0.333159	0.244144	0.0177464	0.271325	-0.530348	-0.0201689	0.191806	0.0196496	-0.135196	9.75827	-0.0137973	0.0197577	0.00872754	0.0921412	0.00929459	0.128763	10.3608	low
GSM1855012	2.95616	0	-0.0590919	-0.114442	-0.0506656	-0.00106523	0.00780744	0.0166147	0.145682	0.321827	0.25298	0.0207185	0.306988	-0.151568	-0.0228255	0.234915	0.020699	-0.104635	9.29553	-0.0149301	0.0221136	0.00931733	0.0727708	0.0100751	0.142655	10.3615	low
GSM1854865	4.44658	0	-0.0559549	-0.104928	-0.0505494	-0.000982176	0.00776891	0.0149879	0.168219	0.343056	0.369952	0.0178895	0.277327	-0.197026	-0.0214455	0.217739	0.0212324	-0.127042	9.22916	-0.0139885	0.0214073	0.00944464	0.0953276	0.00965353	0.130664	10.3619	low
GSM1854820	0.060274	0	-0.0593955	-0.109889	-0.050218	-0.00114205	0.00753428	0.0161876	0.157897	0.340854	0.214458	0.0185049	0.286797	-0.364804	-0.0226668	0.22213	0.0205728	-0.118986	9.54513	-0.0133054	0.0195973	0.00893202	0.0938862	0.0096041	0.140436	10.3621	low
GSM1854892	0.668493	1	-0.0583843	-0.111515	-0.0495314	-0.00104553	0.00790084	0.0166907	0.147744	0.328276	0.255024	0.0192663	0.293902	-0.293503	-0.0189505	0.241524	0.0218494	-0.11041	9.44124	-0.0148093	0.0223018	0.00944982	0.0671042	0.00954069	0.142787	10.3664	low
GSM1854904	2.90685	0	-0.0530679	-0.103577	-0.050767	-0.00107086	0.00774696	0.0159563	0.159182	0.340877	0.317361	0.0175149	0.286157	-0.225636	-0.019521	0.205778	0.0205968	-0.114835	9.33461	-0.0142637	0.01897	0.00904016	0.0844626	0.0092315	0.126597	10.3713	low
GSM1854859	2.23014	1	-0.0520844	-0.105479	-0.0503547	-0.00109689	0.00762702	0.015579	0.166093	0.355133	0.220568	0.0182718	0.291777	-0.311778	-0.0204429	0.181449	0.0207852	-0.133892	9.52435	-0.0136629	0.0177176	0.00881269	0.0927348	0.00965007	0.139138	10.3809	low
GSM1854854	4.12877	0	-0.0672513	-0.111549	-0.0494128	-0.00113274	0.00746702	0.0154864	0.153075	0.362649	0.229372	0.0181185	0.270059	-0.287376	-0.0239495	0.150715	0.0201197	-0.130012	9.59978	-0.0146854	0.0235347	0.00858826	0.0852023	0.0094781	0.133255	10.4015	low
GSM1855200	2.88493	1	-0.0523502	-0.111052	-0.0485623	-0.00103795	0.0076698	0.0146076	0.15909	0.360361	0.203922	0.0177232	0.29774	-0.173146	-0.0181989	0.203799	0.0212062	-0.113749	9.38956	-0.0146674	0.0195086	0.00911115	0.0762058	0.0098467	0.146971	10.4046	low
GSM1854898	0.0438356	0	-0.0643368	-0.113061	-0.0528822	-0.00111874	0.00777605	0.0140433	0.176409	0.359439	0.260075	0.0181696	0.276196	-0.455294	-0.0233464	0.139765	0.0201592	-0.115812	9.74455	-0.0167072	0.0210442	0.00897468	0.0592674	0.00969668	0.135313	10.4083	low
GSM1854997	1.64384	1	-0.0623607	-0.12005	-0.050086	-0.00110483	0.00770083	0.014358	0.163046	0.351061	0.255789	0.0172955	0.276541	-0.348289	-0.0193196	0.190077	0.0203868	-0.123408	9.63679	-0.0141988	0.0201494	0.00914421	0.0823209	0.00955812	0.125406	10.4408	low
GSM1855006	2.70685	0	-0.0604789	-0.106604	-0.0501964	-0.00104847	0.00774466	0.0170971	0.144274	0.322706	0.26364	0.0185899	0.291946	-0.293194	-0.0237213	0.23684	0.0202642	-0.107613	9.5161	-0.0137191	0.0208631	0.00933462	0.0869866	0.0091972	0.137608	10.4466	low
GSM1854880	2.33425	0	-0.0549618	-0.110482	-0.0503356	-0.00110834	0.00788028	0.0157151	0.147119	0.343788	0.255497	0.0191852	0.280557	-0.162669	-0.0216283	0.174612	0.020969	-0.121227	9.46516	-0.0137805	0.0166177	0.00940663	0.0828388	0.00936139	0.138642	10.4512	low
GSM1855170	1.47945	0	-0.058305	-0.109828	-0.0502002	-0.00111071	0.00786359	0.0159195	0.161158	0.350971	0.235765	0.018163	0.295318	-0.303586	-0.0199153	0.183762	0.0203468	-0.118436	9.60572	-0.0151971	0.0187559	0.00918252	0.077531	0.00940776	0.129352	10.4626	low
GSM1855074	2.00822	0	-0.0612251	-0.111249	-0.0464291	-0.00114717	0.00766612	0.014666	0.171266	0.358891	0.234921	0.0176302	0.291113	-0.14474	-0.0176513	0.185748	0.020226	-0.11839	9.4536	-0.013509	0.0180208	0.00892671	0.0715419	0.0096103	0.12386	10.4733	low
GSM1854874	2.3863	1	-0.0670011	-0.108586	-0.0487811	-0.00114901	0.00793967	0.016537	0.165356	0.318276	0.259182	0.0180604	0.263608	-0.266774	-0.024012	0.167929	0.0198157	-0.135268	9.65811	-0.0143882	0.0176644	0.00919887	0.0899112	0.00899332	0.12068	10.4753	low
GSM1854885	1.44658	1	-0.0582347	-0.109456	-0.0513122	-0.00114753	0.00791281	0.0153231	0.15874	0.34502	0.217666	0.017268	0.279391	-0.288647	-0.0197196	0.207778	0.0208439	-0.127048	9.6245	-0.0144639	0.0196327	0.00945581	0.08785	0.0095451	0.125869	10.4768	low
GSM1855124	2.98356	0	-0.0536698	-0.110031	-0.0465135	-0.00109396	0.00811656	0.015803	0.138371	0.363713	0.240779	0.0180125	0.295787	-0.179435	-0.0187654	0.212131	0.0212959	-0.0819052	9.44148	-0.0153574	0.0169636	0.0089401	0.077091	0.00978896	0.12513	10.4866	low
GSM1855061	2.07945	1	-0.0624257	-0.118719	-0.0495648	-0.00102673	0.00733398	0.014864	0.162074	0.354118	0.261652	0.0171676	0.28282	-0.143639	-0.0183826	0.173654	0.0199071	-0.128831	9.48519	-0.0145487	0.0194106	0.00893615	0.078439	0.00952411	0.131257	10.4892	low
GSM1854955	2.07671	0	-0.056158	-0.11396	-0.04905	-0.00112327	0.00783141	0.0146331	0.169809	0.345626	0.253441	0.0178691	0.279217	-0.159914	-0.018237	0.15783	0.0205732	-0.113294	9.52991	-0.0146383	0.020556	0.00919793	0.0707494	0.0090701	0.117521	10.4975	low
GSM1855096	2.23562	0	-0.0529395	-0.113055	-0.0501575	-0.00101384	0.00766834	0.015179	0.155876	0.361242	0.229317	0.0189668	0.277161	-0.494624	-0.0228873	0.193296	0.0213176	-0.107481	9.80725	-0.0144845	0.0199406	0.009066	0.0819716	0.0101814	0.147222	10.499	low
GSM1854833	4.09315	0	-0.0692707	-0.10602	-0.0483399	-0.00109015	0.0076107	0.0156937	0.174334	0.327418	0.193539	0.0173917	0.257807	-0.483484	-0.0233966	0.162478	0.0191199	-0.138605	9.95939	-0.0133602	0.0177842	0.00859937	0.0929642	0.00924262	0.122314	10.5021	low
GSM1854843	3.08767	0	-0.0647356	-0.10759	-0.0500391	-0.00113505	0.00766572	0.0151454	0.167479	0.348245	0.262504	0.0170818	0.281253	-0.175736	-0.0245364	0.155381	0.0205329	-0.135491	9.54644	-0.0146045	0.0159561	0.00898955	0.0906055	0.00941417	0.129602	10.5024	low
GSM1854840	1.33699	1	-0.0638071	-0.108609	-0.0495129	-0.00111701	0.00761231	0.0166427	0.167405	0.3278	0.213235	0.0175099	0.26546	-0.182153	-0.0245489	0.182005	0.0196964	-0.129942	9.61553	-0.0145163	0.0155498	0.00893015	0.0910323	0.00930777	0.122835	10.5063	low
GSM1855021	2.43836	0	-0.0517334	-0.112126	-0.050557	-0.00103557	0.00774306	0.0148415	0.148198	0.346376	0.23574	0.0175941	0.281547	-0.157168	-0.0235618	0.215642	0.0204155	-0.11401	9.47375	-0.0151744	0.0201605	0.00898211	0.0901662	0.00973362	0.142211	10.5077	low
GSM1855149	2.27945	0	-0.0586674	-0.108703	-0.050629	-0.00104344	0.00746556	0.0148423	0.159987	0.354205	0.26618	0.017526	0.279524	-0.221025	-0.0185075	0.193887	0.0198291	-0.129159	9.54541	-0.0143076	0.0199654	0.00910518	0.0847924	0.00947069	0.12775	10.5079	low
GSM1855063	0.956164	1	-0.0564838	-0.118786	-0.0503333	-0.00110463	0.00774138	0.0154995	0.138512	0.347875	0.239469	0.0166715	0.284253	-0.183011	-0.0198366	0.166349	0.0208315	-0.1238	9.60808	-0.0139744	0.0192455	0.00942988	0.0815828	0.0093225	0.124089	10.5216	low
GSM1855032	2.2411	0	-0.0693996	-0.114607	-0.0516169	-0.00107653	0.00788879	0.0138668	0.158775	0.371826	0.25395	0.0181455	0.274225	-0.496654	-0.0210649	0.173069	0.0195051	-0.131922	9.86929	-0.0153568	0.0208017	0.00919453	0.0847612	0.00973685	0.140662	10.524	low
GSM1855040	2.21096	0	-0.0532734	-0.114908	-0.0523739	-0.00104223	0.00781034	0.0150334	0.156541	0.341429	0.245709	0.0176984	0.291519	-0.343573	-0.0212064	0.207736	0.0200401	-0.124296	9.68258	-0.0144524	0.016273	0.00927282	0.0922627	0.00974291	0.141552	10.5301	low
GSM1854877	2.12603	0	-0.0558411	-0.105349	-0.0506413	-0.0010937	0.00777315	0.0150635	0.16007	0.32977	0.269161	0.0172196	0.284889	-0.14153	-0.0227274	0.178796	0.0202063	-0.124677	9.50505	-0.0148105	0.0173367	0.00937006	0.0900337	0.00960333	0.133196	10.5309	low
GSM1854893	0.00821918	1	-0.0529781	-0.112747	-0.0498787	-0.00106651	0.00787409	0.0144337	0.140768	0.346455	0.262995	0.019436	0.298242	-0.164848	-0.0232778	0.197659	0.0216243	-0.106389	9.51005	-0.014304	0.0244076	0.00901047	0.0712655	0.00966636	0.134708	10.5431	low
GSM1855164	2.27397	0	-0.054417	-0.108422	-0.0490857	-0.000977791	0.00783696	0.0146898	0.156538	0.350821	0.284859	0.0193143	0.293248	-0.187733	-0.0215967	0.148733	0.0213866	-0.102434	9.50774	-0.0140673	0.0222404	0.00920266	0.0921798	0.00982752	0.144672	10.5446	low
GSM1855207	3.54247	0	-0.0538414	-0.122876	-0.048529	-0.000987138	0.00739734	0.0137623	0.150393	0.339176	0.215695	0.0197089	0.293797	-0.170319	-0.0228706	0.199991	0.0215661	-0.046123	9.47126	-0.0135717	0.0255464	0.00944665	0.0756131	0.0102476	0.171255	10.5457	low
GSM1855229	5.69041	0	-0.0572145	-0.110619	-0.0498711	-0.00107295	0.0073416	0.0140438	0.165037	0.31736	0.232694	0.0175418	0.278022	-0.449335	-0.0188666	0.174117	0.0191898	-0.134896	9.91088	-0.0139369	0.0183764	0.00902142	0.0848175	0.009082	0.128328	10.55	low
GSM1855055	2.94795	0	-0.0601784	-0.107351	-0.050005	-0.00109698	0.00752835	0.0143292	0.161813	0.339903	0.231992	0.0176426	0.277557	-0.15262	-0.0224614	0.164847	0.0199036	-0.128432	9.604	-0.0134945	0.0181976	0.00880394	0.0826486	0.00926617	0.14185	10.5646	low
GSM1855036	2.55342	1	-0.0662072	-0.109914	-0.0502548	-0.00114482	0.00768283	0.013943	0.173469	0.319523	0.232681	0.0164544	0.272104	-0.426845	-0.0283244	0.162155	0.0186595	-0.135721	9.94502	-0.0146563	0.0167254	0.00893993	0.0767637	0.00960217	0.130611	10.5713	low
GSM1855056	2.90685	0	-0.0632789	-0.107166	-0.0485838	-0.0010871	0.00749322	0.013575	0.167076	0.365472	0.256082	0.0189573	0.274139	-0.149541	-0.0143748	0.12496	0.0203652	-0.111266	9.60976	-0.0144515	0.0214309	0.00885943	0.0690456	0.00948594	0.114837	10.5718	low
GSM1855237	0.49589	1	-0.0528597	-0.106568	-0.0497964	-0.000999244	0.00784429	0.0163861	0.163574	0.381029	0.382093	0.0194952	0.295621	-0.18334	-0.0186673	0.219052	0.0220392	-0.101879	9.33539	-0.0139428	0.021277	0.00947151	0.0800749	0.0100673	0.138869	10.5742	low
GSM1854922	3.15068	0	-0.0591194	-0.105705	-0.0505209	-0.0010962	0.00752338	0.015294	0.160092	0.319586	0.243213	0.0174307	0.271686	-0.308766	-0.0273639	0.158788	0.0191651	-0.134271	9.82377	-0.01432	0.0188384	0.00888638	0.0920753	0.00980103	0.121162	10.5862	low
GSM1855116	1.8411	0	-0.0515917	-0.119722	-0.050588	-0.000985802	0.00784838	0.0136782	0.158036	0.338518	0.304681	0.0175864	0.280243	-0.407154	-0.0196857	0.238118	0.0197705	-0.108641	9.7328	-0.0142399	0.0223482	0.0095009	0.0694476	0.00921725	0.138077	10.5873	low
GSM1854952	3.03014	0	-0.0585102	-0.114442	-0.0492304	-0.00111996	0.00762161	0.015184	0.172577	0.345499	0.260836	0.0178687	0.283113	-0.365245	-0.0242685	0.177451	0.0202598	-0.126831	9.80425	-0.0146402	0.017374	0.00902254	0.0849554	0.0093277	0.128854	10.5999	low
GSM1855121	0.805479	1	-0.0579186	-0.106425	-0.0514329	-0.00106239	0.00757772	0.0146734	0.160436	0.332738	0.255808	0.0175077	0.277841	-0.312967	-0.0194697	0.202404	0.0201535	-0.127121	9.75	-0.0142547	0.0178025	0.00911729	0.0924796	0.0093377	0.127424	10.6046	low
GSM1854884	0.89863	1	-0.055956	-0.108488	-0.0507167	-0.00106983	0.00795129	0.0151031	0.180736	0.332789	0.190312	0.018633	0.280687	-0.212513	-0.0241513	0.180952	0.0208407	-0.123714	9.69637	-0.0144062	0.0185526	0.00914579	0.0904454	0.00956595	0.147234	10.6083	low
GSM1855085	2.66027	0	-0.0561573	-0.110001	-0.0496386	-0.000992332	0.00807467	0.015871	0.157295	0.379711	0.226122	0.0188473	0.284973	-0.189647	-0.0218426	0.255691	0.0217944	-0.124968	9.57309	-0.0140825	0.0236491	0.00957535	0.0633736	0.00990326	0.129147	10.6098	low
GSM1855086	2.41644	0	-0.0546795	-0.113249	-0.0491219	-0.00105762	0.00766464	0.0152538	0.17082	0.352271	0.306186	0.0195038	0.277527	-0.168212	-0.020773	0.184595	0.0196307	-0.123822	9.53168	-0.0141298	0.0241725	0.00923699	0.0757693	0.00974997	0.152758	10.6118	low
GSM1855007	3.09589	0	-0.0607846	-0.108773	-0.0510006	-0.00111615	0.00775839	0.0147459	0.152565	0.342247	0.260111	0.0175449	0.281654	-0.243715	-0.0226569	0.194936	0.0203044	-0.129009	9.69526	-0.0143168	0.0212899	0.00929941	0.0819769	0.00914234	0.136974	10.6144	low
GSM1854808	2.83562	0	-0.060875	-0.107165	-0.0498047	-0.00111466	0.00736419	0.0152635	0.161971	0.329191	0.255402	0.0171254	0.271084	-0.524093	-0.0215656	0.19569	0.019229	-0.142232	10.0136	-0.0134693	0.0191605	0.00875528	0.0941692	0.00942957	0.129699	10.6268	low
GSM1854816	1.12877	0	-0.0549257	-0.112636	-0.0496849	-0.00109961	0.00748777	0.0154199	0.167716	0.359623	0.286573	0.0186801	0.290363	-0.175233	-0.021768	0.226276	0.0207094	-0.110205	9.52289	-0.0132874	0.0176678	0.00911872	0.0834118	0.00997484	0.133568	10.6306	low
GSM1855153	0.890411	1	-0.0568386	-0.113519	-0.0503619	-0.00104235	0.00770598	0.0142575	0.149238	0.349829	0.234335	0.0175192	0.275865	-0.181614	-0.0188539	0.230612	0.0200583	-0.138833	9.66255	-0.0143101	0.0194956	0.00941971	0.0756833	0.00886074	0.137105	10.6372	low
GSM1855168	0.109589	1	-0.0586181	-0.106315	-0.0496776	-0.00105927	0.00782134	0.0155389	0.174828	0.329641	0.298123	0.0169065	0.284236	-0.190491	-0.0199445	0.222451	0.020112	-0.138656	9.59373	-0.0137895	0.0192604	0.00947588	0.0899369	0.00971598	0.125576	10.6388	low
GSM1855220	4.13699	0	-0.0597439	-0.108384	-0.0486752	-0.000844779	0.00764921	0.0164009	0.11883	0.351817	0.361801	0.0195309	0.306688	-0.160264	-0.0177046	0.227221	0.0221128	-0.0971245	9.45999	-0.0129716	0.0207277	0.00912201	0.0742306	0.00997714	0.146291	10.6467	low
GSM1854890	3.04658	0	-0.0601536	-0.110507	-0.0497411	-0.00109864	0.0077921	0.0154949	0.155823	0.338785	0.259142	0.0177622	0.280185	-0.387088	-0.0198988	0.225516	0.0200467	-0.125634	9.83088	-0.0140387	0.0210639	0.00902311	0.091239	0.00928547	0.135941	10.6498	low
GSM1855092	2.00548	0	-0.0648125	-0.106399	-0.0491616	-0.00108325	0.00762634	0.0138508	0.167059	0.337724	0.253601	0.019022	0.285379	-0.210606	-0.0222518	0.173971	0.0199775	-0.141001	9.7252	-0.0142845	0.0176566	0.00867638	0.0930092	0.00979351	0.13127	10.6542	low
GSM1854938	0.216438	0	-0.0509998	-0.109489	-0.0458317	-0.000892517	0.00794856	0.0160992	0.126447	0.33407	0.253717	0.019824	0.286217	-0.166835	-0.0176114	0.190469	0.0213771	-0.0867839	9.63131	-0.013462	0.0234299	0.00933036	0.0718107	0.0101674	0.147039	10.6574	low
GSM1854828	3.24932	0	-0.0631241	-0.10995	-0.0488443	-0.00111011	0.00782382	0.0154071	0.144334	0.344306	0.246401	0.0182233	0.279454	-0.201187	-0.0213097	0.176132	0.0197562	-0.109016	9.72051	-0.0148835	0.0200776	0.00886681	0.0822709	0.00922593	0.138343	10.6617	low
GSM1854851	5.33973	0	-0.0631071	-0.113793	-0.0513936	-0.00106677	0.00764351	0.0160516	0.168731	0.384337	0.200038	0.0171101	0.292254	-0.227997	-0.0194686	0.171092	0.0207392	-0.132217	9.75986	-0.0145188	0.0239764	0.00883579	0.079791	0.00974035	0.136801	10.6734	low
GSM1855024	2.75616	0	-0.054429	-0.112821	-0.0503227	-0.00106007	0.00772742	0.0153596	0.151434	0.336945	0.28546	0.0167227	0.28093	-0.178736	-0.0230363	0.205457	0.0202559	-0.125416	9.67623	-0.0140549	0.0177258	0.00921769	0.0913857	0.00930122	0.131337	10.6956	low
GSM1855076	2.51233	0	-0.0623022	-0.113576	-0.0520215	-0.0010976	0.00751166	0.015458	0.15798	0.325902	0.272519	0.0182041	0.276651	-0.318377	-0.0201132	0.204028	0.0195315	-0.133329	9.85748	-0.013632	0.0210459	0.0091371	0.0802973	0.00965359	0.134715	10.6957	low
GSM1854864	1.09041	1	-0.06092	-0.111856	-0.0497301	-0.00109105	0.0076901	0.0151992	0.171441	0.350196	0.236198	0.0180912	0.261129	-0.203132	-0.0199466	0.161531	0.0204289	-0.129758	9.77424	-0.0144272	0.0219542	0.00896958	0.0877163	0.00914867	0.14708	10.7001	low
GSM1854799	2.89589	0	-0.0567925	-0.109763	-0.0508062	-0.00109617	0.00795686	0.0145683	0.145242	0.326012	0.256091	0.0186217	0.304036	-0.158584	-0.0276404	0.159636	0.0213386	-0.130209	9.71231	-0.0144816	0.0217979	0.00956901	0.0911866	0.00999022	0.152747	10.7017	low
GSM1854987	2.56712	0	-0.0676612	-0.114871	-0.0514605	-0.00114052	0.0076452	0.0148066	0.167677	0.352881	0.16414	0.017712	0.287449	-0.327854	-0.0205407	0.151349	0.0205542	-0.13515	10.0043	-0.0155943	0.0216428	0.00901333	0.0817384	0.00962884	0.128973	10.7052	low
GSM1854847	1.93973	0	-0.0612359	-0.0989331	-0.04976	-0.00105213	0.00740681	0.0162957	0.175248	0.336169	0.271612	0.0172534	0.282503	-0.313163	-0.0205752	0.197802	0.0194487	-0.131081	9.79305	-0.013661	0.0197478	0.00862823	0.0974458	0.00954522	0.143948	10.7066	low
GSM1854861	0.2	1	-0.0564029	-0.106841	-0.047736	-0.00100232	0.00761712	0.0165022	0.159898	0.368878	0.261585	0.0201792	0.274946	-0.182513	-0.0204412	0.190595	0.0214873	-0.106018	9.65294	-0.014025	0.0196844	0.00905086	0.0929592	0.00994424	0.140012	10.7113	low
GSM1855003	2.32329	0	-0.0613829	-0.107518	-0.0501668	-0.00105638	0.00756827	0.0140959	0.162999	0.339125	0.249559	0.0182648	0.277338	-0.173338	-0.0211631	0.200485	0.0194152	-0.137295	9.73615	-0.0144848	0.0186899	0.00859981	0.0878165	0.00932689	0.132453	10.7155	low
GSM1855080	1.83836	0	-0.0554738	-0.108698	-0.0514099	-0.00101201	0.00778988	0.015599	0.15595	0.352546	0.262645	0.0181717	0.279735	-0.156109	-0.0228787	0.250766	0.0205208	-0.124814	9.63748	-0.0143106	0.0209646	0.00919007	0.0898872	0.0099731	0.130491	10.727	low
GSM1855109	1.89863	1	-0.0599751	-0.123841	-0.0509833	-0.000983243	0.00799712	0.0142683	0.138031	0.360816	0.295732	0.0210393	0.310464	-0.145543	-0.0237295	0.158124	0.0212747	-0.109045	9.66127	-0.0144355	0.0193395	0.00936154	0.0809663	0.00971879	0.147199	10.7271	low
GSM1854933	2.2411	0	-0.0584219	-0.1085	-0.0480083	-0.00104076	0.00770575	0.0155761	0.158764	0.346328	0.198645	0.019161	0.300569	-0.159981	-0.0183499	0.182804	0.0214536	-0.0981879	9.7035	-0.0131641	0.0175364	0.00900108	0.0872705	0.0108077	0.154885	10.7284	low
GSM1854951	0.219178	1	-0.0606006	-0.112884	-0.0499403	-0.00107541	0.00755675	0.013923	0.164932	0.331653	0.247352	0.0177471	0.278732	-0.334063	-0.0221243	0.181891	0.0200462	-0.140578	9.93895	-0.0144262	0.0213273	0.00888076	0.0957264	0.00930187	0.126655	10.729	low
GSM1854881	2.00548	1	-0.0535929	-0.102948	-0.0496221	-0.0010663	0.00769061	0.014885	0.184002	0.36185	0.287885	0.0181887	0.290319	-0.153354	-0.0182792	0.197005	0.020632	-0.123871	9.6044	-0.0144914	0.0204992	0.00915518	0.0927242	0.00932056	0.132601	10.7339	low
GSM1855169	2.0274	0	-0.0621536	-0.107912	-0.04938	-0.00112526	0.00743854	0.0150242	0.180671	0.318798	0.245087	0.0176841	0.27191	-0.260604	-0.0221529	0.186225	0.0192179	-0.14929	9.88866	-0.0136438	0.0187625	0.00882475	0.0955167	0.00946368	0.119439	10.7365	low
GSM1855014	3.06575	1	-0.0568825	-0.110382	-0.0506333	-0.00107588	0.0078259	0.01461	0.160719	0.339581	0.260288	0.0172996	0.289052	-0.170774	-0.0223879	0.213492	0.0203598	-0.127476	9.71265	-0.0146716	0.02099	0.00927204	0.0865506	0.0096195	0.131739	10.7398	low
GSM1854800	2.80822	0	-0.0518452	-0.110538	-0.050661	-0.00101981	0.00776035	0.0146107	0.15365	0.383376	0.277112	0.0196532	0.298564	-0.154996	-0.0225931	0.163152	0.0208915	-0.108926	9.64851	-0.0143299	0.0194651	0.00908084	0.0882051	0.010136	0.148457	10.7477	low
GSM1855221	1.92055	0	-0.0581288	-0.114031	-0.0512268	-0.00110691	0.0075042	0.0143701	0.169088	0.354688	0.237444	0.0173959	0.272502	-0.178066	-0.0203021	0.178425	0.0199862	-0.127162	9.79975	-0.0148737	0.0185921	0.00914116	0.0793533	0.00942575	0.131098	10.7539	low
GSM1855185	2.9726	0	-0.0541536	-0.121729	-0.051134	-0.00102457	0.00784036	0.0153772	0.165686	0.332828	0.274011	0.0183931	0.301464	-0.172745	-0.0242606	0.216398	0.0208321	-0.124786	9.7058	-0.0138319	0.022426	0.00937453	0.0856137	0.00929392	0.133049	10.7547	low
GSM1854984	0.0547945	0	-0.0570948	-0.108264	-0.0502106	-0.000997158	0.00746384	0.0158006	0.161548	0.338533	0.238672	0.0179111	0.287263	-0.15838	-0.0196757	0.193595	0.0198746	-0.131185	9.75015	-0.0135337	0.0210564	0.0089712	0.0963423	0.00952987	0.131395	10.7588	low
GSM1855103	1.55616	0	-0.0513626	-0.109461	-0.0496774	-0.00105302	0.00787157	0.0144435	0.168064	0.362285	0.2272	0.0187481	0.30278	-0.181982	-0.0192481	0.204151	0.0211799	-0.10041	9.69056	-0.0136736	0.0178748	0.00929019	0.0809637	0.0107322	0.150456	10.7597	low
GSM1855203	1.08219	0	-0.0502953	-0.109666	-0.0484916	-0.00099654	0.00772432	0.0150244	0.1542	0.379664	0.261358	0.0182503	0.290363	-0.232355	-0.0199087	0.210737	0.0208205	-0.104176	9.72041	-0.0133829	0.0200675	0.00905026	0.0827479	0.00962372	0.143371	10.7641	low
GSM1855145	2.21644	1	-0.056964	-0.107054	-0.0490923	-0.00107437	0.00776813	0.0153828	0.171535	0.36847	0.238148	0.0184892	0.276809	-0.193473	-0.0236234	0.234459	0.0201308	-0.127362	9.72984	-0.0150981	0.0166306	0.009021	0.0851404	0.00983927	0.138297	10.7662	low
GSM1855151	2.1863	0	-0.0705023	-0.115676	-0.0506123	-0.0011023	0.00760434	0.0143293	0.155549	0.39716	0.249997	0.0173853	0.276723	-0.186128	-0.0202339	0.1704	0.0202834	-0.12115	9.81072	-0.0144803	0.0229335	0.00845686	0.0762126	0.00990169	0.115144	10.7729	low
GSM1854937	2.66301	0	-0.0606801	-0.107792	-0.0512514	-0.00108109	0.0077127	0.0149485	0.166317	0.353943	0.23155	0.0190607	0.269797	-0.272445	-0.02442	0.168327	0.0202457	-0.121057	9.92865	-0.0143466	0.0212741	0.00916712	0.077387	0.00988972	0.13772	10.7829	low
GSM1854983	0.317808	1	-0.0547968	-0.121139	-0.0483656	-0.00112232	0.00784869	0.0156278	0.141963	0.345792	0.223593	0.0194527	0.296528	-0.173875	-0.0176359	0.220479	0.0201719	-0.117614	9.79221	-0.0146203	0.0215873	0.00930974	0.0768126	0.00959734	0.137521	10.7893	low
GSM1854954	2.72877	0	-0.0569856	-0.108363	-0.0493359	-0.000993635	0.0078315	0.0158167	0.159385	0.33018	0.21714	0.018219	0.289857	-0.181427	-0.0250513	0.213181	0.0212242	-0.122935	9.796	-0.0139562	0.0253815	0.00964969	0.0873403	0.00987641	0.147304	10.7893	low
GSM1855072	1.86027	0	-0.0584343	-0.110997	-0.0509483	-0.00104606	0.00755505	0.0151082	0.154743	0.331839	0.242044	0.0183626	0.286519	-0.163056	-0.0200605	0.238874	0.0196154	-0.12483	9.75264	-0.0140718	0.0185901	0.00896817	0.0892023	0.00930658	0.142415	10.7923	low
GSM1854836	1.39178	1	-0.0632178	-0.107672	-0.050089	-0.00109878	0.00770481	0.0160949	0.172517	0.337271	0.272666	0.0179446	0.277065	-0.18241	-0.0229903	0.181313	0.0201472	-0.132425	9.79937	-0.0139755	0.0205369	0.0088639	0.0966073	0.00918099	0.129663	10.7931	low
GSM1854818	1.59452	0	-0.0535064	-0.10857	-0.0510675	-0.00101679	0.00744753	0.0159845	0.154503	0.317056	0.218913	0.0190313	0.281985	-0.185674	-0.0244015	0.2012	0.0199101	-0.115145	9.83938	-0.0139427	0.0207776	0.00918647	0.0848507	0.00937165	0.148211	10.7945	low
GSM1855212	4.27123	0	-0.0580193	-0.110425	-0.0505194	-0.00120249	0.00752778	0.0141362	0.161462	0.327587	0.218765	0.0169719	0.260194	-0.277685	-0.020362	0.187104	0.019288	-0.126515	9.99433	-0.013671	0.0163594	0.00921137	0.0812293	0.00967682	0.137064	10.8025	low
GSM1855206	1.86575	1	-0.0518642	-0.108849	-0.0493028	-0.000780465	0.00765527	0.0152668	0.116613	0.369836	0.355552	0.0188713	0.285524	-0.15796	-0.0153914	0.23262	0.0207641	-0.100573	9.62879	-0.0144984	0.0180925	0.009407	0.0678773	0.0106054	0.146749	10.805	low
GSM1855156	2.67945	0	-0.0501584	-0.105472	-0.0506366	-0.00105448	0.00760258	0.0143451	0.176732	0.336734	0.27543	0.0186686	0.277468	-0.19593	-0.0245156	0.184602	0.0204011	-0.110006	9.78368	-0.0131814	0.0168452	0.00908628	0.0850443	0.00948279	0.141185	10.8063	low
GSM1855022	2.27671	0	-0.0599957	-0.106464	-0.0500706	-0.0010753	0.00797876	0.0165397	0.167132	0.351542	0.262259	0.019374	0.293986	-0.357319	-0.023693	0.209244	0.0212011	-0.104005	9.92138	-0.0142894	0.0197368	0.00954102	0.0835853	0.0100597	0.137325	10.814	low
GSM1854838	3.3726	1	-0.060564	-0.11122	-0.0502409	-0.00108627	0.00787816	0.0167646	0.154346	0.379187	0.29465	0.0204337	0.273787	-0.186041	-0.0213477	0.196994	0.0213157	-0.109319	9.75361	-0.0141512	0.017831	0.00931267	0.0763485	0.00999762	0.138361	10.8168	low
GSM1854879	2.66849	0	-0.0651325	-0.114187	-0.0505567	-0.00109787	0.00779881	0.0146495	0.153738	0.366053	0.229394	0.0191322	0.28012	-0.207206	-0.0201845	0.177101	0.0213973	-0.123229	9.88988	-0.0133109	0.0248993	0.00941189	0.0777319	0.0100354	0.131219	10.8177	low
GSM1854917	3.39452	0	-0.0621501	-0.113365	-0.0513144	-0.00114602	0.00752039	0.0163123	0.162289	0.350288	0.24236	0.0181839	0.277063	-0.163329	-0.0244405	0.138142	0.020482	-0.120822	9.90417	-0.0146114	0.0209862	0.00880267	0.0646383	0.00969597	0.131651	10.8214	low
GSM1854873	2.97534	0	-0.0625124	-0.11091	-0.0509897	-0.0010173	0.00797093	0.0154252	0.163719	0.351417	0.36948	0.0186002	0.286708	-0.169616	-0.0206284	0.144182	0.0204894	-0.118694	9.72817	-0.0152688	0.0209287	0.00909372	0.0847954	0.00945048	0.154721	10.8355	low
GSM1855039	0.731507	1	-0.0522244	-0.106949	-0.0500715	-0.000991489	0.00787617	0.0160357	0.165846	0.337374	0.250592	0.0193545	0.294448	-0.173308	-0.0247632	0.223776	0.0209	-0.1107	9.75008	-0.0140301	0.0246232	0.00943604	0.0909328	0.00974003	0.148804	10.8368	low
GSM1854897	0.950685	1	-0.064862	-0.108903	-0.0504415	-0.00104175	0.00786137	0.0156921	0.158452	0.344712	0.29334	0.017996	0.283999	-0.161181	-0.0240751	0.180576	0.0202818	-0.100317	9.78914	-0.0145789	0.0219326	0.00918654	0.0826689	0.0095291	0.133276	10.8432	low
GSM1854931	2.61918	0	-0.0658718	-0.112071	-0.0501799	-0.00112008	0.00760601	0.0141448	0.161817	0.342299	0.195568	0.0184762	0.269241	-0.306119	-0.023984	0.179357	0.0195144	-0.128817	10.0874	-0.0138431	0.0213344	0.00892143	0.0778795	0.00949182	0.134756	10.8458	low
GSM1854887	1.11233	0	-0.0570443	-0.117285	-0.0485711	-0.00100724	0.00782931	0.015617	0.179653	0.366811	0.232384	0.0175583	0.287085	-0.207605	-0.0196425	0.16984	0.0206593	-0.12292	9.88402	-0.0144669	0.0191884	0.00916861	0.0753171	0.00946928	0.142528	10.8486	low
GSM1855144	2.32877	0	-0.0618355	-0.117229	-0.0473203	-0.00112531	0.00763259	0.0136986	0.163963	0.3719	0.235897	0.0176919	0.284123	-0.199811	-0.0215133	0.221804	0.0197435	-0.141798	9.8729	-0.0132379	0.0237507	0.00945676	0.0659899	0.00988473	0.146155	10.8607	low
GSM1854862	4.3726	0	-0.0546987	-0.111049	-0.0499176	-0.00104262	0.0076162	0.0151345	0.160696	0.34194	0.206746	0.01713	0.274137	-0.183069	-0.0214022	0.18539	0.020603	-0.133112	9.93398	-0.013714	0.0197573	0.00898004	0.096163	0.00928285	0.131539	10.8611	low
GSM1855042	2.56712	0	-0.0552561	-0.107221	-0.0498097	-0.00108675	0.00772439	0.0142919	0.147892	0.348985	0.23545	0.0181201	0.295652	-0.319039	-0.02075	0.196752	0.0207936	-0.117982	9.99654	-0.0137629	0.0206875	0.00908703	0.0847744	0.00958339	0.140414	10.8618	low
GSM1854906	3.13973	0	-0.0641198	-0.115345	-0.0494584	-0.00112722	0.00766077	0.0158845	0.120085	0.352526	0.230773	0.0191447	0.284608	-0.16865	-0.0181995	0.174635	0.021145	-0.0972225	9.91179	-0.0144702	0.0238504	0.00876195	0.0671894	0.00931723	0.143399	10.8622	low
GSM1854926	0.717808	0	-0.0588434	-0.113922	-0.0519708	-0.00111121	0.00784086	0.0173339	0.146475	0.385677	0.255528	0.019541	0.281705	-0.277576	-0.023871	0.168492	0.0208195	-0.109842	9.94898	-0.0150595	0.0181736	0.00894411	0.0754803	0.00988474	0.151226	10.8639	low
GSM1855195	2.80822	1	-0.0684335	-0.118377	-0.0516162	-0.00104394	0.00782262	0.0146178	0.139704	0.357237	0.202416	0.0193708	0.297076	-0.185782	-0.0185108	0.205946	0.0199805	-0.124597	9.91307	-0.0149422	0.0208127	0.00936426	0.0962039	0.0102567	0.134026	10.8646	low
GSM1854872	2.31233	0	-0.0698774	-0.108356	-0.0507963	-0.00105036	0.00797985	0.01731	0.154963	0.329639	0.247675	0.0178393	0.28296	-0.171015	-0.0232885	0.187019	0.0198261	-0.120872	9.8918	-0.0151629	0.0213492	0.00924468	0.089612	0.00959533	0.138454	10.8649	low
GSM1855236	4.52603	0	-0.0593088	-0.106613	-0.0498654	-0.00105141	0.00740576	0.0148782	0.175922	0.365063	0.242694	0.0179593	0.281278	-0.208621	-0.0215006	0.176371	0.0202335	-0.128887	9.90031	-0.0151581	0.0153325	0.00899711	0.0869367	0.00959987	0.137844	10.8698	low
GSM1854888	2.30137	0	-0.0574518	-0.114328	-0.0497743	-0.00117649	0.00788089	0.0160231	0.163459	0.359872	0.258963	0.0174233	0.277415	-0.15841	-0.0215018	0.187492	0.0207832	-0.122351	9.86403	-0.0140513	0.0197714	0.00931062	0.0815975	0.0091084	0.116567	10.8706	low
GSM1855097	2.33699	0	-0.0640377	-0.108278	-0.0489048	-0.00110586	0.00781032	0.0148273	0.146757	0.361692	0.229342	0.0186092	0.280034	-0.181307	-0.0212452	0.158158	0.0200373	-0.116432	9.93083	-0.0141737	0.023665	0.00940554	0.0794897	0.00953319	0.136776	10.8715	low
GSM1855054	2.46575	0	-0.0663789	-0.110404	-0.0508487	-0.00111796	0.00744597	0.0130309	0.16151	0.356499	0.207472	0.0170763	0.28751	-0.299077	-0.0206069	0.144777	0.0200884	-0.128865	10.1116	-0.0143235	0.0223724	0.00860663	0.0676077	0.0098487	0.128538	10.8724	low
GSM1855041	1.02192	0	-0.0513849	-0.109168	-0.0513122	-0.00107657	0.00746054	0.0155158	0.163756	0.363373	0.251995	0.0185553	0.296085	-0.360864	-0.0207416	0.222326	0.0199361	-0.120896	9.98829	-0.0144326	0.0175964	0.00882315	0.0817437	0.00988481	0.142713	10.8782	low
GSM1855047	2.79178	0	-0.054321	-0.111542	-0.049315	-0.00101359	0.00768954	0.0149651	0.164221	0.351692	0.295787	0.0204219	0.283849	-0.179051	-0.0236178	0.215071	0.0207061	-0.102275	9.7659	-0.0139162	0.0218964	0.00933786	0.0938919	0.00971867	0.141162	10.8813	low
GSM1854903	1.52877	1	-0.0622771	-0.105841	-0.0506285	-0.00101437	0.00769039	0.0161761	0.16108	0.353806	0.249648	0.0187112	0.276612	-0.173458	-0.0224062	0.223697	0.0215967	-0.120116	9.83517	-0.013153	0.020575	0.00930828	0.0836436	0.00972813	0.151867	10.8904	low
GSM1855028	2.49589	0	-0.0603919	-0.123467	-0.0507963	-0.00102053	0.00759124	0.0157409	0.159072	0.36857	0.255509	0.0196083	0.304325	-0.163598	-0.0190426	0.238697	0.0200795	-0.0873755	9.77616	-0.0148711	0.0179207	0.0089215	0.0711899	0.00957	0.150558	10.903	low
GSM1855005	2.67671	0	-0.0627212	-0.109848	-0.0519896	-0.00106127	0.00791474	0.0156622	0.155709	0.319884	0.259165	0.0183428	0.277877	-0.192823	-0.0273228	0.194553	0.0206774	-0.124056	9.94742	-0.0145651	0.0195288	0.00934984	0.091728	0.0096565	0.142336	10.9054	low
GSM1855133	1.92055	0	-0.0662092	-0.107135	-0.0481238	-0.00114004	0.00744774	0.0128474	0.166604	0.359403	0.269649	0.0175969	0.274486	-0.390726	-0.0223896	0.161679	0.0194863	-0.13996	10.156	-0.0137564	0.0193916	0.00864474	0.0879208	0.0094118	0.129289	10.9104	low
GSM1854899	0.358904	1	-0.0607423	-0.108527	-0.0501666	-0.00111409	0.00784216	0.0156148	0.162868	0.344598	0.252414	0.0184271	0.284186	-0.46138	-0.0214591	0.208765	0.0200597	-0.133511	10.1879	-0.013265	0.0187334	0.00925799	0.0871444	0.00947504	0.135793	10.9129	low
GSM1854814	2.33973	0	-0.0628943	-0.115749	-0.0499507	-0.00105416	0.00784997	0.0142188	0.152251	0.344252	0.242777	0.0190657	0.279967	-0.200829	-0.0188405	0.203173	0.0202026	-0.122089	9.96705	-0.0141676	0.0196198	0.00929586	0.0794435	0.00958746	0.132285	10.9155	low
GSM1854910	3.14247	0	-0.0573563	-0.110746	-0.0500192	-0.00107821	0.00748109	0.0154872	0.160781	0.335489	0.242628	0.0181447	0.280322	-0.423121	-0.0209239	0.194836	0.0203003	-0.125177	10.1854	-0.0142037	0.0197401	0.0087865	0.0854398	0.00952365	0.134609	10.9163	low
GSM1855132	2.35068	0	-0.0611131	-0.106666	-0.0492375	-0.00107544	0.00759288	0.0147625	0.15594	0.343691	0.291386	0.0176576	0.288681	-0.392149	-0.0230039	0.222025	0.0207496	-0.135665	10.0664	-0.0135088	0.0207844	0.008989	0.0893357	0.00962051	0.144771	10.92	low
GSM1854867	4.05753	0	-0.0614119	-0.104078	-0.0479044	-0.00113258	0.00774319	0.0153554	0.176909	0.365863	0.256819	0.0168948	0.290894	-0.162389	-0.017919	0.235647	0.0196408	-0.119109	9.81053	-0.0147836	0.0197858	0.00909381	0.080672	0.00936142	0.135778	10.9223	low
GSM1855029	2.13699	1	-0.0568372	-0.109924	-0.0485764	-0.000979404	0.00805862	0.0153644	0.150369	0.322818	0.292579	0.0186955	0.296252	-0.159985	-0.0218007	0.221332	0.0211335	-0.0999814	9.8161	-0.0145566	0.0267507	0.00951079	0.0730699	0.0100547	0.15409	10.9235	low
GSM1855107	2.48219	0	-0.0541875	-0.111681	-0.0511864	-0.00104305	0.00767538	0.0145574	0.154355	0.326659	0.282716	0.0189218	0.30571	-0.148453	-0.0250101	0.213355	0.020705	-0.117595	9.82348	-0.0144718	0.0199773	0.00921471	0.0944759	0.00989778	0.148397	10.9265	low
GSM1855069	0.835616	0	-0.0577018	-0.114363	-0.0495219	-0.00108788	0.00768635	0.0160807	0.152147	0.240981	0.22413	0.0192962	0.293578	-0.157173	-0.0213679	0.167553	0.0208849	-0.118786	10.0802	-0.0148475	0.0186057	0.0091276	0.0763572	0.0093927	0.12806	10.9293	low
GSM1855051	1.70411	0	-0.0617889	-0.106268	-0.0489937	-0.00109918	0.00783997	0.0145905	0.16151	0.401383	0.266123	0.017841	0.285636	-0.319916	-0.0200013	0.226726	0.0205315	-0.12504	9.9761	-0.0142028	0.0212602	0.00945521	0.0766757	0.00939544	0.132014	10.9298	low
GSM1854961	0.309589	1	-0.0541239	-0.110409	-0.0482911	-0.00100487	0.0075192	0.0153436	0.14657	0.35962	0.23073	0.0200409	0.283424	-0.163756	-0.0234269	0.218772	0.0209111	-0.104681	9.86864	-0.0140345	0.0202395	0.0090694	0.0880699	0.00988436	0.15277	10.9319	low
GSM1854980	2.05205	0	-0.061487	-0.105926	-0.0491709	-0.00106221	0.00746653	0.0147163	0.169908	0.339681	0.249339	0.0178741	0.268553	-0.407475	-0.019337	0.219127	0.0197729	-0.146076	10.1713	-0.0132658	0.0190976	0.00884599	0.0953223	0.00966444	0.126758	10.9337	low
GSM1855073	2.85479	0	-0.0665595	-0.109541	-0.0518441	-0.00106666	0.00741017	0.0136665	0.148938	0.362868	0.266488	0.0179642	0.283247	-0.348527	-0.0207955	0.210631	0.0190275	-0.138083	10.0944	-0.0131289	0.0231247	0.00912636	0.0884823	0.0100316	0.13303	10.9389	low
GSM1854927	0.208219	1	-0.0557194	-0.111637	-0.0500874	-0.00103237	0.00788257	0.0154393	0.140488	0.322974	0.218916	0.0194044	0.28598	-0.166646	-0.021339	0.214798	0.0208681	-0.125732	9.96528	-0.0135478	0.0215752	0.00931507	0.0904039	0.00984579	0.142769	10.9402	low
GSM1854966	0.0630137	1	-0.0640646	-0.114527	-0.0498376	-0.00111739	0.00729758	0.0152273	0.161743	0.331655	0.27141	0.0180333	0.275774	-0.292007	-0.021246	0.199197	0.0196289	-0.140231	10.0845	-0.0139049	0.0226588	0.00881716	0.0880181	0.00957245	0.124227	10.9409	low
GSM1855098	2.07945	0	-0.0672162	-0.105644	-0.0483708	-0.00112286	0.00761103	0.0139929	0.162383	0.356274	0.245388	0.0190451	0.272108	-0.399456	-0.0235187	0.205689	0.0190836	-0.140488	10.1867	-0.0141028	0.0216687	0.00878483	0.0849717	0.00956415	0.130541	10.9439	low
GSM1854916	3.1589	0	-0.0573995	-0.101164	-0.0486442	-0.0011208	0.00791855	0.0156811	0.165781	0.371416	0.28573	0.0186116	0.291208	-0.196217	-0.0190826	0.219078	0.020458	-0.118186	9.85708	-0.0149607	0.0176029	0.00929786	0.0830158	0.00964505	0.131384	10.9471	low
GSM1854871	3.06849	0	-0.0623581	-0.109891	-0.0504466	-0.00106448	0.00771952	0.0165798	0.163142	0.333242	0.240237	0.0178088	0.278204	-0.163493	-0.0188937	0.1787	0.0208202	-0.106882	9.98268	-0.0142004	0.0209985	0.00913074	0.0721125	0.00870408	0.12777	10.9506	low
GSM1855113	2.05479	0	-0.0653174	-0.112728	-0.0507288	-0.00112072	0.00739643	0.0143487	0.161679	0.369516	0.241075	0.0173305	0.266711	-0.234636	-0.0231599	0.155725	0.0201359	-0.13561	10.103	-0.014768	0.0235449	0.00872849	0.072134	0.00965304	0.11941	10.9523	low
GSM1854936	2.63562	0	-0.0532184	-0.108849	-0.0469379	-0.00112509	0.0075762	0.0142844	0.176886	0.351122	0.216262	0.016982	0.265699	-0.19612	-0.0168536	0.174327	0.019578	-0.118437	10.0329	-0.0136439	0.0165498	0.00917824	0.0809995	0.00892371	0.117138	10.9532	low
GSM1854913	1.85205	0	-0.0582159	-0.111092	-0.0496992	-0.00106128	0.00760661	0.0160302	0.158539	0.356802	0.303082	0.0177105	0.287591	-0.177626	-0.0204149	0.187437	0.020966	-0.120386	9.87609	-0.0155292	0.0192125	0.00900457	0.0962641	0.00956538	0.141979	10.9539	low
GSM1855181	1.46301	0	-0.0494524	-0.111421	-0.0506344	-0.00111282	0.00733204	0.0153975	0.171581	0.368623	0.301112	0.0181532	0.28825	-0.195985	-0.016542	0.232027	0.0205189	-0.117939	9.82641	-0.0130373	0.0180328	0.00883925	0.0874908	0.00971428	0.142393	10.9598	low
GSM1855152	2.18904	0	-0.059196	-0.11109	-0.0501553	-0.0010825	0.00759127	0.0150719	0.177506	0.360991	0.270385	0.0172536	0.275	-0.147766	-0.0212154	0.183563	0.0199478	-0.119475	9.91568	-0.0154785	0.0213681	0.00913524	0.0637929	0.00963764	0.139918	10.9614	low
GSM1855110	1.86301	0	-0.0603667	-0.113128	-0.0524776	-0.00107106	0.00771288	0.0139362	0.159147	0.363333	0.270949	0.0182659	0.27837	-0.163593	-0.0219995	0.183402	0.0204224	-0.126203	9.94488	-0.0144098	0.0149598	0.00914136	0.0882553	0.00986189	0.133804	10.9632	low
GSM1855134	1.04658	1	-0.0644003	-0.106684	-0.0503911	-0.00111327	0.00742914	0.0129432	0.169088	0.338439	0.246157	0.0172282	0.272814	-0.514232	-0.0267039	0.185823	0.0197806	-0.137621	10.3535	-0.0140664	0.0159363	0.00892271	0.0879089	0.00996794	0.132887	10.9636	low
GSM1854990	2.27397	0	-0.0642508	-0.112519	-0.0489461	-0.00115775	0.00752767	0.0137143	0.151354	0.34196	0.25062	0.0195787	0.267546	-0.348003	-0.0249571	0.143933	0.0205971	-0.131928	10.2523	-0.0152449	0.0200355	0.00901835	0.073364	0.00968495	0.133176	10.9674	low
GSM1854826	4.07671	0	-0.0676039	-0.110759	-0.0497121	-0.00117868	0.00762512	0.0154199	0.165895	0.330361	0.249164	0.0170298	0.257932	-0.153629	-0.0268943	0.139796	0.0194115	-0.128118	10.0713	-0.0145933	0.0215418	0.00912277	0.081196	0.00931823	0.124973	10.9676	low
GSM1854962	2.2137	0	-0.059909	-0.114171	-0.0500735	-0.0010973	0.00758772	0.0156902	0.165676	0.347122	0.267202	0.0183242	0.256563	-0.296627	-0.0195353	0.205811	0.0204922	-0.132965	10.126	-0.0145586	0.0191831	0.00900331	0.0745089	0.00946365	0.117933	10.9717	low
GSM1854813	2.26027	0	-0.0596492	-0.111401	-0.0510335	-0.00104949	0.00750421	0.0152027	0.153749	0.353564	0.250468	0.0180258	0.265884	-0.18109	-0.0207636	0.176767	0.0196825	-0.131077	10.0382	-0.0161048	0.0198248	0.00901441	0.0794377	0.0094899	0.127597	10.9722	low
GSM1855162	2.01096	0	-0.0666834	-0.109693	-0.0501792	-0.00104596	0.00731658	0.0147792	0.156492	0.36817	0.261375	0.0179035	0.278776	-0.199677	-0.0197978	0.156683	0.019604	-0.129453	10.0378	-0.0151038	0.0224263	0.0084952	0.0843336	0.0097245	0.125571	10.9778	low
GSM1854798	3.42192	0	-0.0687111	-0.11792	-0.0515749	-0.00108554	0.00787309	0.0141619	0.162044	0.342152	0.264697	0.0181327	0.273536	-0.329179	-0.0219622	0.159545	0.0197739	-0.126204	10.1779	-0.0152788	0.0206278	0.00935177	0.0866853	0.00993741	0.14428	10.9787	low
GSM1854994	2.47945	0	-0.065866	-0.11519	-0.0506147	-0.00110133	0.0075273	0.0137779	0.161233	0.35216	0.237818	0.0172823	0.273934	-0.35946	-0.0240384	0.158649	0.0194758	-0.12605	10.2544	-0.0153727	0.0202705	0.00904897	0.0713577	0.00961056	0.13016	10.979	low
GSM1854928	3.39452	0	-0.0622256	-0.110074	-0.0512926	-0.00110411	0.00775705	0.0156436	0.154386	0.349865	0.202754	0.0180717	0.273884	-0.159129	-0.0226595	0.183382	0.0208331	-0.121946	10.047	-0.0143128	0.0218293	0.00899646	0.084629	0.00988482	0.128545	10.9847	high
GSM1855083	2.27945	0	-0.0543881	-0.110488	-0.051957	-0.00102853	0.00781299	0.014384	0.144357	0.371011	0.24722	0.0189261	0.297889	-0.184856	-0.018865	0.20797	0.0209609	-0.106992	9.91473	-0.0148494	0.0193444	0.00910901	0.0854662	0.00929328	0.160335	10.9854	high
GSM1855114	1.93973	0	-0.0515328	-0.105434	-0.0497286	-0.00108659	0.00791229	0.014744	0.176758	0.366473	0.345612	0.0183029	0.28882	-0.252173	-0.0202704	0.206107	0.0211991	-0.122742	9.90564	-0.0140843	0.0223618	0.00933416	0.0761019	0.00962208	0.135423	10.9874	high
GSM1855067	2.70411	0	-0.0567731	-0.108012	-0.0496381	-0.00109398	0.00769591	0.0141401	0.189331	0.349413	0.363657	0.0179525	0.290259	-0.317606	-0.018169	0.232068	0.020455	-0.135612	9.9492	-0.013959	0.0224437	0.00921222	0.088684	0.00952667	0.126313	10.9895	high
GSM1854830	3.62466	0	-0.0639875	-0.106805	-0.0488544	-0.000878223	0.00753328	0.014563	0.191108	0.334152	0.247268	0.0179878	0.269328	-0.169991	-0.0187573	0.144655	0.0192073	-0.0877315	10.0135	-0.015445	0.0204477	0.00873552	0.0782028	0.00919289	0.130383	10.9939	high
GSM1855010	1.86575	0	-0.0660764	-0.0994928	-0.0494815	-0.00102984	0.00786416	0.0160891	0.159992	0.31	0.250842	0.018286	0.271442	-0.157798	-0.0279341	0.159267	0.0196911	-0.120034	10.0606	-0.0147948	0.0205563	0.00914776	0.0969435	0.00942456	0.132299	11.0058	high
GSM1854992	1.51781	0	-0.0577937	-0.112193	-0.0501256	-0.00100876	0.00771332	0.0142179	0.157076	0.352325	0.331409	0.0188159	0.275718	-0.251052	-0.0209958	0.22775	0.0210598	-0.120746	9.9808	-0.0137947	0.0208373	0.00947579	0.0761298	0.00988524	0.13778	11.0133	high
GSM1854979	2.05753	0	-0.0623314	-0.112052	-0.0503941	-0.00116777	0.00768671	0.0143857	0.150594	0.341647	0.226335	0.0183808	0.288637	-0.292944	-0.0227386	0.195673	0.020247	-0.130626	10.1943	-0.0156841	0.0175151	0.00922552	0.0811874	0.00970133	0.129339	11.0169	high
GSM1854923	3.63288	0	-0.0617048	-0.115379	-0.0491759	-0.00108644	0.00765884	0.016848	0.161236	0.331859	0.264936	0.017882	0.274315	-0.291913	-0.0226108	0.206845	0.0200586	-0.127066	10.119	-0.0141979	0.0203238	0.00892696	0.0881482	0.00985034	0.158612	11.0234	high
GSM1855226	4.38082	0	-0.0613876	-0.104845	-0.0491037	-0.00112614	0.00754432	0.0142824	0.178594	0.351615	0.314753	0.0170077	0.297315	-0.452441	-0.0178983	0.208144	0.0192972	-0.130549	10.1891	-0.0135977	0.0169433	0.00909529	0.0831931	0.00987222	0.137678	11.0234	high
GSM1854924	0.339726	0	-0.0671665	-0.114364	-0.0506056	-0.00112822	0.00788591	0.01564	0.155986	0.340414	0.221785	0.0178567	0.281989	-0.264285	-0.0244075	0.179971	0.0202355	-0.131149	10.2075	-0.0146322	0.0205829	0.00917831	0.085507	0.00970969	0.121056	11.0276	high
GSM1855125	0.0465753	1	-0.0639672	-0.109904	-0.0489798	-0.00095709	0.00780598	0.0152597	0.147815	0.35518	0.289419	0.0183156	0.275009	-0.1567	-0.0200814	0.207463	0.0208403	-0.111803	9.95805	-0.0144542	0.0219403	0.0093682	0.0860772	0.00989549	0.132046	11.0276	high
GSM1854911	2.73699	1	-0.0625548	-0.104053	-0.0487876	-0.00104971	0.00765331	0.0149853	0.163901	0.369768	0.249968	0.0169988	0.272003	-0.164476	-0.0175485	0.197415	0.0182437	-0.113312	9.98951	-0.0148522	0.0178076	0.00856588	0.077905	0.00982871	0.146777	11.0347	high
GSM1854844	0.528767	1	-0.0633158	-0.120654	-0.0478797	-0.0011682	0.0077509	0.0163078	0.170583	0.364783	0.263238	0.0166459	0.281016	-0.204975	-0.0158586	0.194687	0.0200265	-0.123962	10.0603	-0.014468	0.0216754	0.00908789	0.0820839	0.00974136	0.127861	11.0535	high
GSM1854856	2.47945	1	-0.0612382	-0.110786	-0.0522327	-0.00105453	0.00794337	0.0156393	0.166631	0.349168	0.235318	0.0195532	0.286078	-0.158304	-0.0220778	0.203381	0.0216305	-0.122027	10.0361	-0.0141534	0.0202863	0.00938947	0.0793906	0.00957915	0.136409	11.0547	high
GSM1854989	2.63562	0	-0.0565801	-0.116317	-0.0487961	-0.0011587	0.00765969	0.0146931	0.176354	0.331558	0.240586	0.0174778	0.264372	-0.293504	-0.0229046	0.150542	0.0208037	-0.121575	10.2454	-0.0142395	0.0182787	0.00926164	0.0798637	0.00947892	0.144449	11.0557	high
GSM1854853	0.753425	0	-0.055035	-0.110984	-0.050187	-0.00106109	0.00765156	0.0171795	0.162653	0.347229	0.287327	0.0190219	0.281787	-0.18294	-0.0205451	0.175732	0.0205725	-0.124234	10.015	-0.0136937	0.018378	0.00910143	0.0929971	0.00997179	0.152035	11.0579	high
GSM1855238	4.46301	1	-0.0547372	-0.114268	-0.0497129	-0.00101878	0.00755071	0.0146301	0.16958	0.379221	0.274672	0.0187695	0.299565	-0.174151	-0.0176099	0.19236	0.0207416	-0.116907	9.96826	-0.0143693	0.0182019	0.00902441	0.0816007	0.00969176	0.143675	11.0648	high
GSM1855052	2.60548	1	-0.0551015	-0.108015	-0.0517694	-0.0010947	0.00774383	0.0154651	0.163605	0.338673	0.272453	0.0183264	0.270666	-0.314954	-0.0234613	0.235091	0.0201366	-0.127041	10.1509	-0.0143883	0.0235623	0.00939217	0.0898372	0.00983052	0.137085	11.0669	high
GSM1854827	1.5863	0	-0.056186	-0.109758	-0.0494402	-0.00103302	0.00791622	0.0170949	0.131435	0.367476	0.209119	0.0194401	0.286144	-0.153448	-0.0242074	0.237917	0.0215314	-0.12574	10.034	-0.0132254	0.0212368	0.00929755	0.0754558	0.0100985	0.153151	11.0683	high
GSM1855202	1.71781	1	-0.0528596	-0.11643	-0.0494701	-0.00111742	0.00723371	0.01569	0.160472	0.374307	0.21345	0.0182112	0.307631	-0.174485	-0.0165959	0.186852	0.0200596	-0.114099	10.0571	-0.0142488	0.0155416	0.00874772	0.0774621	0.00980103	0.13796	11.0712	high
GSM1854986	1.58082	0	-0.0576113	-0.111009	-0.0504495	-0.00101731	0.00772137	0.0154375	0.162841	0.337632	0.193779	0.0188644	0.288653	-0.151768	-0.0233748	0.197675	0.0211002	-0.117668	10.0755	-0.0147423	0.0220262	0.00951615	0.0913302	0.00976202	0.148509	11.0727	high
GSM1855122	2.07397	0	-0.0537994	-0.108785	-0.0514478	-0.00110555	0.00759494	0.012967	0.108153	0.340504	0.256032	0.0178394	0.30106	-0.210997	-0.0239052	0.24332	0.0191716	-0.102344	10.0962	-0.0118536	0.0174778	0.00890387	0.0623083	0.0096333	0.136975	11.0739	high
GSM1855161	0.909589	1	-0.0563869	-0.111314	-0.0489288	-0.00100291	0.00757755	0.0152482	0.164851	0.361957	0.251698	0.0181835	0.281603	-0.354445	-0.0215529	0.195273	0.0206858	-0.122172	10.2203	-0.0137602	0.0188446	0.00924538	0.0779477	0.00937433	0.153778	11.077	high
GSM1855068	2.82466	1	-0.0534148	-0.112073	-0.0505168	-0.000974896	0.00791273	0.0147973	0.152562	0.342508	0.237351	0.0194361	0.282602	-0.231369	-0.0250352	0.195443	0.0212292	-0.123762	10.134	-0.0146361	0.0202764	0.00948271	0.0920102	0.0100911	0.149781	11.0777	high
GSM1855182	0.0109589	0	-0.0602651	-0.112105	-0.0487231	-0.00109531	0.00754397	0.0126121	0.157907	0.364641	0.262137	0.0187644	0.288892	-0.287352	-0.0220839	0.180936	0.0199233	-0.119729	10.1838	-0.0156016	0.0212161	0.0087632	0.0793525	0.00950567	0.133648	11.0827	high
GSM1855079	0.920548	1	-0.0554209	-0.109411	-0.0498967	-0.00103621	0.00790119	0.0143504	0.148823	0.345545	0.276463	0.0187403	0.287132	-0.170208	-0.0249978	0.224615	0.0210326	-0.100673	10.0092	-0.0145525	0.0233708	0.00934182	0.0768827	0.00990791	0.139452	11.0866	high
GSM1855102	1.66301	0	-0.0635908	-0.112663	-0.0514404	-0.00110355	0.00788406	0.0139762	0.167526	0.340987	0.249357	0.0178504	0.278637	-0.150006	-0.0228407	0.170505	0.0207345	-0.121039	10.0922	-0.0139438	0.0177098	0.00914318	0.0851116	0.00954995	0.14245	11.087	high
GSM1855127	1.47671	0	-0.0648087	-0.107805	-0.0499086	-0.00108464	0.00752265	0.0135408	0.159031	0.348784	0.270261	0.0180122	0.267079	-0.340346	-0.0219277	0.190154	0.0199054	-0.143179	10.2718	-0.0137659	0.0205396	0.00887634	0.088862	0.00969951	0.1367	11.0879	high
GSM1854909	2.43562	0	-0.0613436	-0.118618	-0.0490425	-0.0010654	0.00809912	0.0148777	0.137137	0.393887	0.214135	0.0180861	0.299445	-0.219674	-0.023506	0.166835	0.0212877	-0.131589	10.1783	-0.0149583	0.0211575	0.00912187	0.0777256	0.0099366	0.139445	11.0897	high
GSM1854932	2.19726	0	-0.0622964	-0.104861	-0.0515272	-0.00102959	0.00761098	0.0163042	0.153864	0.341884	0.275031	0.0188777	0.296463	-0.188852	-0.0199214	0.188984	0.0202432	-0.123608	10.0904	-0.0143488	0.0213556	0.00889327	0.0843426	0.00952242	0.123565	11.0909	high
GSM1855184	0.610959	1	-0.0560868	-0.110896	-0.0508428	-0.00110101	0.00756606	0.0148549	0.163002	0.326981	0.19614	0.0180868	0.279295	-0.184658	-0.022669	0.177676	0.0206226	-0.124328	10.1986	-0.0145249	0.0210837	0.00912536	0.0804296	0.00941319	0.138599	11.0964	high
GSM1854957	0.775342	1	-0.0588523	-0.113028	-0.0499344	-0.00110702	0.00757483	0.0158495	0.160476	0.348838	0.252525	0.0192025	0.259627	-0.172266	-0.0207179	0.144716	0.0205564	-0.11253	10.171	-0.0135182	0.0219373	0.00898119	0.0794286	0.00932986	0.12461	11.1027	high
GSM1854866	3.39178	0	-0.0581039	-0.118337	-0.0519888	-0.00106834	0.00771846	0.0170677	0.165375	0.379951	0.269141	0.0191191	0.28454	-0.241721	-0.0196918	0.195558	0.0209854	-0.132883	10.1244	-0.0159554	0.0153045	0.00887438	0.0890393	0.00972416	0.135749	11.1028	high
GSM1855160	0.890411	0	-0.0547364	-0.10565	-0.0492377	-0.00101436	0.00739649	0.0152077	0.15433	0.38738	0.182842	0.0183186	0.287742	-0.247726	-0.0186444	0.238655	0.0202615	-0.11225	10.1416	-0.0149017	0.0178277	0.00921534	0.0769305	0.0100168	0.143566	11.1071	high
GSM1855189	2.31233	1	-0.0547355	-0.114559	-0.0514314	-0.00111814	0.0077416	0.0153918	0.153039	0.347466	0.269499	0.0165435	0.291711	-0.303934	-0.0170235	0.19494	0.0205704	-0.129166	10.2303	-0.0143791	0.0190277	0.00919805	0.0790544	0.00941189	0.130503	11.1081	high
GSM1855043	2.81918	0	-0.0542859	-0.105624	-0.0488431	-0.00108229	0.00763203	0.0146911	0.167522	0.363965	0.27352	0.0178146	0.296787	-0.295409	-0.019702	0.19552	0.0207851	-0.112904	10.1416	-0.0133856	0.0163135	0.00918994	0.0894982	0.0099652	0.138571	11.1121	high
GSM1855093	2.09863	0	-0.0590234	-0.116453	-0.0510545	-0.00110194	0.00774197	0.014196	0.167825	0.340251	0.233814	0.0178472	0.274243	-0.191957	-0.0219378	0.194189	0.0208437	-0.128733	10.1796	-0.0150895	0.0212988	0.00920555	0.0856416	0.00944404	0.126038	11.1168	high
GSM1854945	5.43562	0	-0.0548933	-0.109403	-0.0502664	-0.00108724	0.00806034	0.0161391	0.153863	0.357398	0.249113	0.0194467	0.289818	-0.222884	-0.0219	0.192571	0.0218442	-0.113303	10.1324	-0.0146565	0.0209531	0.00940281	0.0889016	0.0101105	0.139224	11.1209	high
GSM1854998	2.33425	1	-0.057171	-0.114227	-0.0489324	-0.00112749	0.00780558	0.0148371	0.152843	0.33723	0.217033	0.018505	0.297357	-0.173092	-0.0208372	0.19081	0.0206862	-0.124556	10.1776	-0.0148727	0.0170626	0.00920723	0.0852655	0.00954732	0.128011	11.1289	high
GSM1855224	1.69315	1	-0.0502554	-0.107075	-0.0500808	-0.00097725	0.00765838	0.0145263	0.151936	0.35567	0.252094	0.017801	0.298884	-0.173442	-0.023469	0.224806	0.0212871	-0.0975356	10.03	-0.0143448	0.0253076	0.00934802	0.0879312	0.01008	0.139199	11.1294	high
GSM1855230	4.52603	0	-0.0673085	-0.11439	-0.0499834	-0.00109192	0.007605	0.0141864	0.186753	0.324899	0.239373	0.0174913	0.279747	-0.192361	-0.021443	0.223401	0.0193608	-0.116871	10.1342	-0.0158359	0.0202522	0.00902843	0.0862662	0.0097469	0.140692	11.1337	high
GSM1854902	0.0739726	0	-0.0664275	-0.111878	-0.0500794	-0.00112731	0.00762138	0.0143098	0.151126	0.347334	0.264163	0.01789	0.266522	-0.394929	-0.0180546	0.167446	0.0201279	-0.140377	10.4218	-0.0141326	0.0220177	0.00908248	0.0952272	0.00917985	0.123331	11.1402	high
GSM1854831	0.860274	1	-0.0531264	-0.0998561	-0.0480202	-0.00104665	0.00796558	0.0164267	0.177226	0.386761	0.383555	0.0183762	0.303145	-0.28451	-0.0178382	0.210556	0.0214931	-0.101218	9.9719	-0.0137265	0.0178494	0.00931364	0.0815518	0.0095836	0.145295	11.1417	high
GSM1855019	0.980822	1	-0.0585256	-0.111489	-0.0499882	-0.0010239	0.0077097	0.0162389	0.149661	0.335479	0.252907	0.018202	0.293745	-0.21212	-0.0196266	0.224279	0.0204534	-0.122761	10.1432	-0.0139186	0.0197827	0.00916027	0.0946436	0.00953407	0.136577	11.1421	high
GSM1854915	0.383562	0	-0.0563149	-0.107836	-0.0506898	-0.00110721	0.00772165	0.0151656	0.170263	0.329897	0.349459	0.0180925	0.277209	-0.382579	-0.0208576	0.232856	0.0204851	-0.12899	10.2276	-0.0136146	0.0190699	0.00929398	0.0842239	0.00972763	0.136037	11.1451	high
GSM1855128	2.48219	0	-0.0543506	-0.104244	-0.0469704	-0.00103313	0.00763907	0.0127679	0.161998	0.330633	0.198118	0.0183023	0.280842	-0.147319	-0.0228783	0.202046	0.0205371	-0.119211	10.1643	-0.0137036	0.0186618	0.00904513	0.0737182	0.00972004	0.148873	11.1475	high
GSM1855008	2.25479	0	-0.0630956	-0.108535	-0.0518854	-0.00111744	0.00791549	0.0161819	0.163592	0.369265	0.481439	0.0176691	0.281461	-0.229158	-0.025957	0.253338	0.0199348	-0.125637	9.90866	-0.0134517	0.0191831	0.00923069	0.0843032	0.0098873	0.130267	11.1535	high
GSM1854908	3.12603	0	-0.0579242	-0.109325	-0.0508496	-0.00105081	0.00767002	0.015626	0.167461	0.349894	0.287283	0.0188388	0.279291	-0.231536	-0.0210845	0.224198	0.0202865	-0.128652	10.1314	-0.014786	0.0215479	0.00896348	0.0897297	0.00945109	0.138914	11.1554	high
GSM1855087	2.56986	0	-0.0623466	-0.105349	-0.0499391	-0.00110112	0.00756231	0.0143977	0.177403	0.333739	0.344958	0.0180548	0.28848	-0.327934	-0.019573	0.203517	0.0190581	-0.143623	10.2061	-0.0131175	0.018542	0.00900378	0.0879524	0.010047	0.140815	11.1566	high
GSM1855177	1.56164	0	-0.0609441	-0.110208	-0.0495524	-0.00105929	0.00744481	0.0131561	0.166084	0.339173	0.285381	0.0176011	0.282433	-0.258492	-0.0218538	0.187779	0.0192665	-0.125385	10.229	-0.013409	0.0188145	0.00901265	0.0782405	0.00935376	0.135302	11.1572	high
GSM1854920	2.60274	0	-0.0576068	-0.112843	-0.0500269	-0.00111808	0.00756832	0.0162308	0.164806	0.374332	0.334848	0.0171036	0.254332	-0.356165	-0.0218315	0.161231	0.0202473	-0.126213	10.3116	-0.0149692	0.0242166	0.0091569	0.0690938	0.00957876	0.124109	11.1577	high
GSM1855095	1.58356	0	-0.0563898	-0.110897	-0.0485195	-0.000967027	0.00782525	0.0151291	0.151795	0.333651	0.279196	0.019144	0.290263	-0.17132	-0.0229241	0.221229	0.0207878	-0.0959476	10.0565	-0.0135016	0.0239431	0.00949724	0.0813544	0.00968431	0.1593	11.1588	high
GSM1854934	2.32603	0	-0.0656496	-0.111427	-0.0503561	-0.00112362	0.00765449	0.0143671	0.16944	0.341317	0.232701	0.0177283	0.273413	-0.176288	-0.0235734	0.152225	0.0203894	-0.130236	10.2642	-0.0159021	0.019345	0.00911283	0.0757466	0.00968714	0.129495	11.1623	high
GSM1855141	2.24932	0	-0.0659913	-0.112676	-0.0485545	-0.00108572	0.00751981	0.0144258	0.155101	0.345864	0.20412	0.0185246	0.274192	-0.151523	-0.020352	0.15754	0.0194268	-0.136262	10.275	-0.0146915	0.0216304	0.00847563	0.0904245	0.00950076	0.115684	11.1663	high
GSM1855035	2.94247	0	-0.055223	-0.107286	-0.0505773	-0.00108251	0.00770206	0.0140777	0.163739	0.334716	0.288146	0.0171044	0.271168	-0.166629	-0.0215364	0.210808	0.0194186	-0.12509	10.1151	-0.0143595	0.0235559	0.00929889	0.0904845	0.0100606	0.132747	11.1663	high
GSM1854852	4.29863	0	-0.0644582	-0.110473	-0.0467935	-0.00111385	0.00764747	0.0141472	0.175703	0.361308	0.270281	0.0175782	0.267951	-0.30107	-0.0196763	0.1611	0.0195202	-0.139885	10.3146	-0.0142401	0.0197317	0.00896276	0.0823601	0.00950514	0.134387	11.167	high
GSM1854848	3.39726	0	-0.0622269	-0.108492	-0.0511136	-0.00113811	0.00763027	0.016672	0.180024	0.349991	0.264541	0.0182223	0.276693	-0.381096	-0.0255145	0.198046	0.0204278	-0.129989	10.3563	-0.0141177	0.0161018	0.00886941	0.0831974	0.00985751	0.136847	11.1697	high
GSM1855228	0.468493	1	-0.0596697	-0.111235	-0.0500521	-0.00109255	0.00760438	0.0164516	0.155229	0.35743	0.307712	0.0199668	0.289108	-0.274467	-0.0234398	0.22786	0.0205164	-0.129263	10.1592	-0.0137763	0.0181694	0.00936914	0.0942784	0.00995609	0.141051	11.1709	high
GSM1854811	2.88493	0	-0.0646226	-0.110284	-0.0502756	-0.00113706	0.00778416	0.0151994	0.161613	0.361552	0.288831	0.017842	0.283896	-0.14782	-0.0204118	0.181404	0.0208391	-0.126098	10.1219	-0.015514	0.021998	0.00926941	0.0819527	0.0096221	0.127182	11.1747	high
GSM1854829	3.15342	0	-0.0666143	-0.11116	-0.0493382	-0.00102658	0.00786507	0.0164957	0.129476	0.318067	0.213813	0.0200344	0.29141	-0.178177	-0.0244177	0.217724	0.0211408	-0.106401	10.2251	-0.0140949	0.0226752	0.00935403	0.0841757	0.0103832	0.14278	11.1793	high
GSM1854809	0.117808	0	-0.0650579	-0.115975	-0.0504205	-0.00111234	0.00743196	0.0154729	0.149179	0.355359	0.252518	0.0187467	0.280535	-0.173364	-0.0207686	0.140474	0.0201143	-0.127247	10.2674	-0.0138898	0.0227646	0.0090986	0.0755972	0.00944246	0.124907	11.1812	high
GSM1855214	5.02466	0	-0.0662307	-0.116094	-0.0521738	-0.00107049	0.0075395	0.0139126	0.164614	0.347595	0.242411	0.0176597	0.269393	-0.372287	-0.0195499	0.17254	0.0196109	-0.139645	10.4554	-0.0150765	0.0202045	0.00891496	0.0867763	0.00947972	0.128646	11.1826	high
GSM1854868	1.17808	1	-0.0459533	-0.107038	-0.0472966	-0.000902847	0.00784013	0.0166227	0.131603	0.348756	0.255043	0.0195646	0.293516	-0.192533	-0.0205322	0.142207	0.0211617	-0.136408	10.2476	-0.0133895	0.0269053	0.00945804	0.0731139	0.00983371	0.151818	11.191	high
GSM1855000	2.21096	0	-0.0541242	-0.116987	-0.0497427	-0.000949592	0.00784485	0.0148385	0.140398	0.328469	0.24028	0.0199216	0.288534	-0.137444	-0.0232384	0.235959	0.0215102	-0.0916769	10.1229	-0.0130616	0.0252072	0.00955301	0.0662047	0.00998585	0.153539	11.1979	high
GSM1855075	2.45753	0	-0.0657707	-0.116037	-0.0505846	-0.00107989	0.00794107	0.0136181	0.159132	0.348248	0.266998	0.0176406	0.283689	-0.177149	-0.0185324	0.192047	0.02139	-0.124022	10.2021	-0.0144562	0.0205447	0.00894976	0.0793725	0.00965702	0.1394	11.2031	high
GSM1854869	2.11233	0	-0.0616215	-0.113676	-0.049824	-0.00110326	0.0077382	0.0160582	0.169969	0.3752	0.380342	0.01816	0.283072	-0.272206	-0.0220249	0.18479	0.0198355	-0.117089	10.1552	-0.012842	0.0204634	0.00891912	0.0781839	0.00934453	0.12932	11.2062	high
GSM1855045	2.35616	0	-0.0662194	-0.109838	-0.0498907	-0.00110921	0.00762618	0.0140704	0.148717	0.349736	0.23998	0.0185742	0.294682	-0.41684	-0.0233992	0.210375	0.0191718	-0.112738	10.4572	-0.0142945	0.0147668	0.00891343	0.0727799	0.0102134	0.134867	11.2074	high
GSM1855190	1.42466	1	-0.0538939	-0.111134	-0.0506977	-0.0010456	0.00787982	0.0143263	0.156288	0.341915	0.183832	0.0195799	0.289953	-0.275374	-0.0236438	0.21953	0.0210582	-0.131471	10.3608	-0.014627	0.0244376	0.00964439	0.0875224	0.0101466	0.134687	11.2198	high
GSM1854875	2.91233	0	-0.0552102	-0.108212	-0.0501655	-0.00104512	0.00746073	0.0150294	0.151158	0.354581	0.246655	0.0187183	0.276471	-0.239003	-0.0194224	0.200766	0.020155	-0.127224	10.2795	-0.0135683	0.0210526	0.00872682	0.0914945	0.00948102	0.134149	11.2216	high
GSM1855038	2.3863	0	-0.0561211	-0.117933	-0.0502467	-0.000987476	0.00795195	0.0155446	0.168597	0.355661	0.312263	0.0184148	0.285207	-0.173487	-0.0211466	0.232437	0.0207114	-0.099407	10.079	-0.014653	0.0176757	0.00937525	0.0888764	0.0097699	0.138504	11.226	high
GSM1855196	4.27397	1	-0.0552739	-0.110282	-0.0496153	-0.0010804	0.0077423	0.0142029	0.169668	0.350909	0.339836	0.0188742	0.286622	-0.223298	-0.0232614	0.165917	0.0209116	-0.115758	10.1785	-0.0150438	0.0235276	0.00931798	0.0782616	0.0098322	0.14649	11.227	high
GSM1854977	1.89589	0	-0.0549164	-0.109692	-0.0502683	-0.00104753	0.0073969	0.0146632	0.160297	0.32863	0.260699	0.0179934	0.281328	-0.154222	-0.0185164	0.205052	0.0192219	-0.125128	10.1971	-0.0152	0.0221746	0.008717	0.0892047	0.00952377	0.136443	11.2294	high
GSM1855208	3.54247	1	-0.0500343	-0.110682	-0.0511805	-0.00105351	0.0078212	0.0144045	0.165027	0.348056	0.256959	0.0186868	0.275411	-0.17545	-0.024867	0.161261	0.0212861	-0.12752	10.2731	-0.0154837	0.0162234	0.00913334	0.0820029	0.00949708	0.136132	11.2387	high
GSM1855222	3.73425	0	-0.0551486	-0.111314	-0.050235	-0.00105747	0.0074303	0.0159792	0.173321	0.336192	0.293329	0.0183608	0.286338	-0.197656	-0.0185534	0.202022	0.0201482	-0.12853	10.2022	-0.014532	0.0184185	0.00891272	0.0834711	0.00928859	0.147932	11.2463	high
GSM1855204	2.7589	1	-0.0623725	-0.111462	-0.0538763	-0.00105298	0.0076398	0.0145344	0.155442	0.361252	0.26584	0.0193132	0.299779	-0.225427	-0.0162383	0.221752	0.0206974	-0.110469	10.2331	-0.0147009	0.0160147	0.00910961	0.0825759	0.0096126	0.129586	11.2507	high
GSM1854842	2.95616	1	-0.0655566	-0.108163	-0.0489862	-0.00109594	0.00772656	0.0172633	0.169917	0.32731	0.277923	0.0182915	0.276025	-0.369452	-0.0204717	0.200143	0.0197928	-0.143958	10.4485	-0.0133893	0.0183678	0.00900895	0.0937081	0.00966036	0.129138	11.2517	high
GSM1854929	1.87123	0	-0.0644564	-0.112022	-0.0494225	-0.0010549	0.00769569	0.0146819	0.158162	0.336034	0.192883	0.0180876	0.280411	-0.18946	-0.0184046	0.187218	0.0197804	-0.133057	10.3701	-0.0149596	0.0218188	0.00911657	0.0895524	0.00939597	0.121604	11.2537	high
GSM1855082	1.63014	0	-0.0628883	-0.108692	-0.0505672	-0.00109016	0.00761035	0.0144923	0.15828	0.35006	0.280332	0.0172561	0.264814	-0.389281	-0.0231494	0.203288	0.0197604	-0.135243	10.466	-0.0150526	0.0226721	0.00907241	0.0808173	0.00978526	0.137831	11.2561	high
GSM1854891	1.21096	1	-0.0596488	-0.110917	-0.0480017	-0.000993968	0.00795862	0.0172452	0.155663	0.34031	0.288835	0.0202883	0.292357	-0.175686	-0.0196816	0.253536	0.0218945	-0.100259	10.129	-0.0141177	0.0239344	0.00937642	0.0883155	0.0100153	0.127544	11.2569	high
GSM1855106	0.838356	1	-0.0552214	-0.11456	-0.0514579	-0.0010093	0.00756915	0.015073	0.149223	0.366426	0.243704	0.0192286	0.297252	-0.200897	-0.0217871	0.208088	0.0208146	-0.120326	10.2364	-0.0155925	0.0199953	0.00923503	0.088636	0.00958256	0.14702	11.2574	high
GSM1855105	1.52055	0	-0.0626238	-0.110549	-0.0508718	-0.00110603	0.00759328	0.0139248	0.158757	0.339822	0.244093	0.0179903	0.277945	-0.339678	-0.0227298	0.18136	0.0198227	-0.133799	10.4703	-0.0147751	0.0186214	0.00901673	0.0916371	0.00946531	0.13338	11.2576	high
GSM1855015	2.37808	0	-0.0644254	-0.104375	-0.0480426	-0.00108702	0.00755838	0.0143176	0.165465	0.341775	0.372313	0.0169495	0.274277	-0.379682	-0.01852	0.212259	0.0187066	-0.140346	10.3569	-0.0124959	0.0166164	0.00862793	0.0841626	0.00957142	0.127441	11.258	high
GSM1854815	2.24658	0	-0.0609331	-0.108887	-0.0494153	-0.00102254	0.00773231	0.0165553	0.156304	0.332717	0.302841	0.0195279	0.282977	-0.134428	-0.0227539	0.225847	0.0208781	-0.117889	10.1287	-0.014162	0.0237962	0.00903577	0.0854811	0.00947009	0.1483	11.2607	high
GSM1855053	2.78082	0	-0.0639861	-0.115825	-0.0502844	-0.00108401	0.00762603	0.0144068	0.157143	0.362701	0.222511	0.0186768	0.272012	-0.144008	-0.0205095	0.16177	0.0196099	-0.132509	10.3226	-0.015553	0.0183815	0.00873227	0.0781703	0.00961329	0.130603	11.2608	high
GSM1854935	1.40274	1	-0.0601403	-0.103055	-0.049676	-0.00104268	0.00784041	0.0151427	0.158499	0.350328	0.297431	0.0187406	0.291891	-0.167159	-0.0182839	0.187584	0.0203429	-0.126701	10.1853	-0.013397	0.0213511	0.00911248	0.0882981	0.0101383	0.138267	11.2608	high
GSM1855157	2.20822	0	-0.0665504	-0.112061	-0.0497092	-0.00104777	0.00755774	0.0157482	0.163974	0.350182	0.252576	0.0175991	0.273234	-0.2941	-0.0214145	0.209611	0.0205848	-0.124132	10.372	-0.0137549	0.0214381	0.00917005	0.0865581	0.00954501	0.13541	11.2624	high
GSM1854839	2.51233	0	-0.066288	-0.105958	-0.0492472	-0.00113609	0.00771708	0.0155101	0.176954	0.358968	0.248602	0.0175237	0.271875	-0.161293	-0.0210987	0.163654	0.0197853	-0.121265	10.2699	-0.0144525	0.0222629	0.0088996	0.0788567	0.00928199	0.133846	11.2629	high
GSM1855049	0.6	1	-0.0556964	-0.106305	-0.0500311	-0.00106576	0.00758637	0.0154903	0.145939	0.328705	0.248013	0.0187594	0.276934	-0.156493	-0.0219023	0.218202	0.0201974	-0.110262	10.2342	-0.0147187	0.0175719	0.00936496	0.0808559	0.00982146	0.14847	11.2636	high
GSM1854850	4.61644	0	-0.0593511	-0.126549	-0.0465548	-0.00112755	0.00755013	0.0158898	0.178882	0.384141	0.217934	0.018148	0.28427	-0.296896	-0.0179834	0.167784	0.0206233	-0.122008	10.4189	-0.0138778	0.0154786	0.00909082	0.070159	0.0097333	0.132006	11.2662	high
GSM1855123	2.08219	0	-0.0594741	-0.109163	-0.050263	-0.00109382	0.00768095	0.0137365	0.16011	0.344252	0.347494	0.018668	0.281503	-0.178948	-0.0230374	0.242238	0.0204315	-0.1398	10.1323	-0.0135945	0.0188601	0.00925948	0.0897619	0.00969637	0.148178	11.2688	high
GSM1855089	2.28493	0	-0.0574791	-0.106152	-0.04998	-0.00104185	0.00749521	0.0153921	0.166214	0.343933	0.456454	0.0179798	0.307495	-0.298479	-0.0214616	0.24466	0.0186515	-0.140315	10.1154	-0.0119404	0.0225015	0.00940407	0.0826296	0.00981069	0.137754	11.2689	high
GSM1854863	4.07671	0	-0.0620173	-0.115226	-0.0494253	-0.00110927	0.00766744	0.0144982	0.168514	0.383747	0.238142	0.0186821	0.266739	-0.209179	-0.0176151	0.162649	0.0201291	-0.117068	10.346	-0.0148415	0.0219782	0.00898981	0.0728245	0.00960941	0.116024	11.2697	high
GSM1855117	1.28767	0	-0.0465068	-0.108598	-0.0502238	-0.00104593	0.00795912	0.0148718	0.166909	0.38992	0.32544	0.0190929	0.294983	-0.274178	-0.0201422	0.230166	0.0221026	-0.111491	10.1566	-0.0132527	0.0179903	0.0095206	0.079625	0.00943065	0.150604	11.2698	high
GSM1855018	2.40548	0	-0.0585558	-0.112758	-0.0521561	-0.00103982	0.00782365	0.0156215	0.155994	0.344534	0.289441	0.018319	0.294974	-0.358819	-0.0198372	0.236366	0.0203298	-0.126704	10.3631	-0.0140913	0.0221972	0.00902546	0.0838374	0.0096495	0.144537	11.2718	high
GSM1855215	4.24932	0	-0.0589977	-0.112295	-0.0494114	-0.00111563	0.00746173	0.0136923	0.177308	0.358698	0.237045	0.0188042	0.271977	-0.170087	-0.0200471	0.182388	0.0204819	-0.112257	10.2778	-0.0156299	0.0214705	0.00907964	0.0724616	0.0095399	0.140925	11.2793	high
GSM1854947	0.769863	1	-0.0540505	-0.11173	-0.0516001	-0.00107387	0.00784059	0.0154115	0.171696	0.34996	0.2646	0.020084	0.273809	-0.196031	-0.0240756	0.209265	0.0205139	-0.0966588	10.2126	-0.0141042	0.0180574	0.00915668	0.0854739	0.00963552	0.165876	11.2847	high
GSM1855101	2.52055	1	-0.0636691	-0.11736	-0.0506195	-0.00100141	0.00780762	0.0140237	0.147298	0.349402	0.228903	0.0192862	0.279602	-0.158751	-0.0205449	0.212276	0.0210178	-0.112261	10.2754	-0.014411	0.0208181	0.00929586	0.0825197	0.00955574	0.1488	11.2874	high
GSM1854974	2.30137	0	-0.0601631	-0.1086	-0.0518309	-0.00108509	0.00766882	0.0147833	0.168038	0.324625	0.217175	0.0181409	0.27535	-0.149356	-0.0248227	0.166092	0.0205012	-0.121062	10.354	-0.0144069	0.0166911	0.00913685	0.0874125	0.00974345	0.130545	11.2886	high
GSM1854930	2.53699	0	-0.0622584	-0.107568	-0.0504666	-0.00110795	0.00761	0.0159371	0.168119	0.345011	0.238692	0.0179178	0.288338	-0.223407	-0.0180427	0.223677	0.01979	-0.142564	10.3368	-0.0149914	0.0190649	0.0089305	0.0896251	0.0097117	0.126373	11.2952	high
GSM1855046	2.5726	0	-0.0680093	-0.110983	-0.0498437	-0.00108795	0.00732654	0.0145876	0.155979	0.358397	0.230923	0.0176037	0.274896	-0.238298	-0.0189116	0.167816	0.0200389	-0.122168	10.4176	-0.0147781	0.0204872	0.00900599	0.0843866	0.00986387	0.137366	11.3022	high
GSM1855050	1.91233	0	-0.0592731	-0.119711	-0.0523493	-0.00108737	0.00801123	0.0143013	0.141387	0.32053	0.176614	0.0188624	0.291519	-0.233654	-0.0191156	0.156237	0.0206149	-0.11875	10.5026	-0.0139636	0.0205887	0.00903216	0.0817196	0.00932705	0.149203	11.3026	high
GSM1855027	2.29315	1	-0.061134	-0.110043	-0.0484603	-0.00101016	0.00766498	0.0158329	0.148261	0.358308	0.253277	0.0184614	0.292192	-0.181206	-0.0205087	0.196827	0.0201117	-0.119646	10.2897	-0.0147004	0.0180219	0.00883091	0.0863974	0.00939963	0.141091	11.3077	high
GSM1855059	1.61096	0	-0.0684454	-0.119294	-0.0505187	-0.00110645	0.00778027	0.0145184	0.14642	0.351819	0.237249	0.0172553	0.279361	-0.155504	-0.0201309	0.153158	0.0206015	-0.134838	10.3978	-0.0148703	0.0188822	0.00905715	0.0736956	0.00954589	0.135357	11.3078	high
GSM1854835	3.10685	0	-0.0657837	-0.109256	-0.0493753	-0.00103419	0.00763429	0.0155097	0.155536	0.362471	0.241316	0.0196722	0.27665	-0.416387	-0.0216126	0.185211	0.0198659	-0.120621	10.5447	-0.0137349	0.0199317	0.00898591	0.0889596	0.00960864	0.154372	11.3126	high
GSM1855234	4.63836	0	-0.0522024	-0.107736	-0.0487141	-0.000949351	0.00765409	0.0157208	0.14333	0.333766	0.235105	0.01937	0.290773	-0.16964	-0.0206071	0.241799	0.0209677	-0.116241	10.2715	-0.0142305	0.0244068	0.00937224	0.085659	0.00901985	0.136433	11.3146	high
GSM1854944	3.19452	0	-0.0600543	-0.106906	-0.0499437	-0.00103394	0.00762662	0.0156179	0.14641	0.369837	0.21669	0.0182378	0.284972	-0.204414	-0.0224534	0.192702	0.0206041	-0.119673	10.3669	-0.0138083	0.020441	0.00900378	0.0889751	0.00966698	0.139317	11.3288	high
GSM1854886	1.13699	1	-0.0528581	-0.111357	-0.0507574	-0.00110895	0.00795584	0.0157096	0.157297	0.361739	0.321704	0.0177561	0.306518	-0.170528	-0.0202354	0.240214	0.0212955	-0.117795	10.1662	-0.0128706	0.017541	0.00941749	0.0853532	0.00982227	0.132415	11.3334	high
GSM1855143	1.61918	0	-0.06251	-0.109037	-0.0494021	-0.00113099	0.00757512	0.014643	0.159401	0.336067	0.254807	0.0178637	0.274535	-0.212439	-0.0210404	0.186805	0.0195873	-0.125435	10.4081	-0.013406	0.0220292	0.00901013	0.0751847	0.00946044	0.134507	11.3352	high
GSM1855119	2.13699	0	-0.0551219	-0.111343	-0.0511771	-0.000996634	0.00776192	0.014058	0.189953	0.37979	0.380057	0.0184901	0.298369	-0.142568	-0.017434	0.228912	0.021246	-0.107522	10.0445	-0.0136819	0.021868	0.00886938	0.0846989	0.00898407	0.127561	11.3353	high
GSM1855120	0.591781	1	-0.0542148	-0.108716	-0.0503781	-0.00103562	0.00777554	0.0148639	0.148391	0.338301	0.298481	0.018802	0.290471	-0.185262	-0.0217303	0.261445	0.0212879	-0.123104	10.2195	-0.0147069	0.0214769	0.00942287	0.0875343	0.00969301	0.152	11.3403	high
GSM1855235	1.95342	1	-0.0569757	-0.108428	-0.0502315	-0.00105189	0.00777335	0.0138126	0.166821	0.350895	0.254308	0.0171111	0.27451	-0.189915	-0.0184766	0.247484	0.0211667	-0.130958	10.3035	-0.0148564	0.022186	0.00948653	0.0796526	0.00920533	0.138962	11.346	high
GSM1854942	1.44384	0	-0.0589842	-0.106864	-0.0489136	-0.000999368	0.00790997	0.0160818	0.158041	0.344736	0.232285	0.0216645	0.290844	-0.431618	-0.0223739	0.229444	0.0209401	-0.117103	10.5546	-0.0149408	0.0193685	0.00944459	0.0905462	0.0100284	0.144266	11.3484	high
GSM1855077	2.34247	0	-0.0564234	-0.112745	-0.0505376	-0.00102847	0.00750602	0.0156525	0.152872	0.35654	0.240537	0.0180723	0.282781	-0.194101	-0.0193422	0.219079	0.0192458	-0.120199	10.3369	-0.0139193	0.0219948	0.00901406	0.087184	0.0094579	0.140473	11.349	high
GSM1855112	2.24658	0	-0.0567488	-0.108336	-0.0504618	-0.00106316	0.00756972	0.0129193	0.160515	0.34281	0.25725	0.0179168	0.286553	-0.373658	-0.0208303	0.202487	0.0202873	-0.138974	10.5515	-0.0141953	0.0196508	0.00899355	0.0897359	0.00947096	0.128719	11.3521	high
GSM1855218	1.33973	1	-0.0685178	-0.112027	-0.0508204	-0.00111641	0.00754027	0.0142586	0.17659	0.349177	0.188312	0.0169609	0.271008	-0.388997	-0.0209146	0.16973	0.0192709	-0.138998	10.6697	-0.0143322	0.0229513	0.00910745	0.0879556	0.00988518	0.138195	11.3549	high
GSM1855172	2.18356	0	-0.0586851	-0.111489	-0.0495274	-0.00109811	0.00774427	0.0128973	0.157411	0.363506	0.310241	0.0184918	0.28303	-0.172407	-0.0214355	0.174416	0.0201004	-0.115226	10.2902	-0.0143299	0.0165367	0.00921343	0.0817865	0.00974227	0.147394	11.3585	high
GSM1854919	2.69041	0	-0.0675368	-0.112307	-0.0509867	-0.00109845	0.00752096	0.0150484	0.154803	0.362562	0.221292	0.0177967	0.29005	-0.312071	-0.0253312	0.189051	0.0189169	-0.131472	10.5422	-0.0137559	0.0187552	0.00896237	0.0866971	0.0101384	0.130673	11.3599	high
GSM1855057	0.208219	0	-0.0614239	-0.107392	-0.049537	-0.00102792	0.00768094	0.0147857	0.150765	0.382099	0.245164	0.0179046	0.283672	-0.150551	-0.0192298	0.151591	0.0200375	-0.11763	10.356	-0.0145866	0.0158004	0.00900433	0.0873134	0.00983874	0.136364	11.3666	high
GSM1855199	0.80274	1	-0.0499479	-0.0987944	-0.0502795	-0.00097764	0.00794557	0.0155374	0.168027	0.398002	0.374224	0.0187562	0.314325	-0.183974	-0.0193934	0.209581	0.0215647	-0.0907275	10.083	-0.0128673	0.0209684	0.00961082	0.087004	0.0100562	0.143135	11.3748	high
GSM1854985	1.88219	0	-0.0622287	-0.106243	-0.0476334	-0.0011199	0.00740627	0.0135782	0.163941	0.351292	0.208551	0.0183807	0.276829	-0.185873	-0.0243901	0.182611	0.0199023	-0.141812	10.462	-0.0149781	0.0179658	0.00877916	0.0830914	0.00949794	0.13683	11.3764	high
GSM1854819	0.0767123	0	-0.0658139	-0.118103	-0.0503288	-0.00109743	0.00776095	0.0159101	0.169662	0.319771	0.277345	0.0183814	0.281571	-0.17843	-0.0236511	0.225547	0.0200282	-0.110565	10.3491	-0.0146805	0.0194495	0.00918286	0.0837207	0.00967144	0.133713	11.3781	high
GSM1855146	0.389041	0	-0.0641453	-0.111301	-0.0517205	-0.00110591	0.00774133	0.0137714	0.164589	0.369062	0.248928	0.0185491	0.286138	-0.144117	-0.0230877	0.206804	0.020613	-0.120203	10.3171	-0.0143593	0.0200043	0.00918265	0.0777524	0.00989809	0.145389	11.3854	high
GSM1854958	2.52329	0	-0.0664075	-0.115562	-0.0516695	-0.00110088	0.00732325	0.0150939	0.167051	0.38357	0.19794	0.0190161	0.286493	-0.357959	-0.0240203	0.225926	0.0197423	-0.126028	10.5709	-0.0143947	0.0226256	0.00892017	0.0829316	0.00977279	0.135595	11.3958	high
GSM1855175	1.0411	1	-0.0534319	-0.117834	-0.0509327	-0.00107382	0.00759192	0.0135387	0.157302	0.352581	0.259475	0.0185575	0.293301	-0.155989	-0.0210108	0.191573	0.0205412	-0.128589	10.3726	-0.0144059	0.0210906	0.00906942	0.087462	0.00977006	0.139791	11.411	high
GSM1855140	2.27397	0	-0.0549276	-0.107802	-0.0503192	-0.00106429	0.00773848	0.0141832	0.157545	0.34437	0.230225	0.017911	0.283384	-0.246358	-0.0257029	0.20892	0.0208051	-0.126073	10.5032	-0.0142597	0.0171666	0.00936323	0.0902695	0.00984289	0.13189	11.4203	high
GSM1854964	1.7589	0	-0.0569583	-0.104945	-0.0480105	-0.00105975	0.00778345	0.0158179	0.178909	0.344539	0.366162	0.0179847	0.282876	-0.180974	-0.0189685	0.257545	0.0212017	-0.122942	10.2138	-0.0132432	0.0223018	0.00957601	0.0881354	0.009866	0.13183	11.4212	high
GSM1854834	2.80548	0	-0.0634976	-0.117455	-0.0512264	-0.00107705	0.00782013	0.0149144	0.156219	0.36188	0.288546	0.0171432	0.277499	-0.160109	-0.0241665	0.157858	0.0204398	-0.115258	10.4433	-0.0161679	0.0220525	0.00924444	0.0798397	0.0094387	0.145693	11.463	high
GSM1854849	4.0137	0	-0.0707034	-0.11182	-0.0498828	-0.00110492	0.00767909	0.0160044	0.170011	0.356365	0.27303	0.0180281	0.268339	-0.173124	-0.0216689	0.151294	0.0213264	-0.124525	10.4971	-0.0144779	0.0199165	0.0092167	0.0794836	0.00965032	0.133335	11.4634	high
GSM1854918	3.16712	0	-0.0599079	-0.110193	-0.0473673	-0.00108572	0.00766958	0.0149209	0.161373	0.359316	0.191938	0.0182466	0.270741	-0.212958	-0.0216166	0.194524	0.0199315	-0.126824	10.5919	-0.0139874	0.0228031	0.00898456	0.0780755	0.0100056	0.139569	11.496	high
GSM1855213	4.66575	0	-0.0634465	-0.113985	-0.0498522	-0.00107981	0.00754631	0.0139605	0.187927	0.361872	0.22098	0.0175338	0.270477	-0.431873	-0.0199297	0.166194	0.0195767	-0.124354	10.8102	-0.0163954	0.0186659	0.00916414	0.0780354	0.00936539	0.128275	11.4988	high
GSM1855173	1.85205	1	-0.0522807	-0.106124	-0.0465604	-0.00110461	0.00734554	0.0132156	0.145066	0.355561	0.269113	0.0168954	0.309225	-0.159959	-0.0145193	0.221333	0.0191072	-0.105955	10.4129	-0.014192	0.0151976	0.00959752	0.071662	0.00905438	0.129694	11.5043	high
GSM1854967	2.53151	0	-0.0572419	-0.108143	-0.0485042	-0.00102539	0.0077796	0.0150186	0.148409	0.330117	0.256475	0.0183089	0.287483	-0.198847	-0.0201452	0.258609	0.0204597	-0.123963	10.4801	-0.0140986	0.0217397	0.0092543	0.0789364	0.00974572	0.136839	11.5073	high
GSM1854870	3.03836	0	-0.0585966	-0.108261	-0.0502012	-0.00102456	0.00781665	0.0153402	0.130419	0.372897	0.200724	0.0189096	0.279422	-0.163323	-0.0240375	0.196832	0.0195047	-0.113581	10.5557	-0.0145045	0.0199112	0.00892794	0.0785373	0.010037	0.131906	11.5134	high
GSM1855159	2.3589	0	-0.0641702	-0.114471	-0.0502778	-0.0011042	0.00779407	0.0143856	0.165031	0.378331	0.247221	0.0175929	0.284889	-0.189064	-0.0206281	0.225875	0.0194168	-0.127252	10.4793	-0.014345	0.0242195	0.00912427	0.0807752	0.00964259	0.132325	11.5146	high
GSM1855223	3.10959	1	-0.0598846	-0.1124	-0.0504999	-0.00104192	0.00770415	0.0144093	0.156713	0.355414	0.294986	0.0181181	0.277801	-0.399842	-0.0201729	0.180958	0.0194905	-0.125927	10.7293	-0.0155212	0.0151677	0.00873998	0.0755018	0.00946765	0.137641	11.5162	high
GSM1854804	2.65479	0	-0.0596638	-0.106358	-0.0514226	-0.00113582	0.00775467	0.0145185	0.159141	0.351157	0.323197	0.0181584	0.269804	-0.365423	-0.0250158	0.243311	0.0204665	-0.12111	10.6177	-0.0136288	0.0187665	0.00924144	0.0790026	0.00975251	0.14034	11.5385	high
GSM1854857	3.80274	0	-0.0610976	-0.113463	-0.0468983	-0.00103703	0.00748042	0.0157573	0.15324	0.347806	0.280342	0.0183944	0.282398	-0.24248	-0.0187206	0.222398	0.0201399	-0.12011	10.5714	-0.0143867	0.0170334	0.00865323	0.0811762	0.00959396	0.136869	11.5545	high
GSM1855192	0.654795	1	-0.0617465	-0.113468	-0.0511641	-0.00102106	0.0077724	0.0160533	0.150541	0.346834	0.231421	0.0184152	0.294027	-0.182474	-0.0214942	0.232967	0.0212082	-0.116816	10.555	-0.0152299	0.0195901	0.00935405	0.0827924	0.00961202	0.123519	11.5557	high
GSM1855037	2.89589	0	-0.0583518	-0.112133	-0.0490133	-0.00100029	0.00776028	0.0148187	0.166046	0.380675	0.336617	0.0181572	0.297299	-0.140281	-0.0192947	0.236024	0.0206589	-0.100385	10.3112	-0.0154648	0.0196332	0.00902509	0.082797	0.0096647	0.149278	11.5637	high
GSM1854960	2.6	0	-0.0650498	-0.114784	-0.0522518	-0.00105619	0.00767353	0.0146061	0.137911	0.365104	0.254157	0.0194032	0.274749	-0.202706	-0.02015	0.139383	0.0205698	-0.105025	10.6596	-0.0145321	0.0196729	0.00914633	0.0795283	0.00978362	0.134943	11.5706	high
GSM1854825	3.6411	0	-0.0730467	-0.118656	-0.0523793	-0.00108787	0.00756643	0.0150551	0.167285	0.356534	0.236864	0.0182348	0.29521	-0.177291	-0.0228202	0.220223	0.0197554	-0.121948	10.5625	-0.0157673	0.0222648	0.00881993	0.0878698	0.00929289	0.137828	11.5823	high
GSM1854821	3.45205	0	-0.0645687	-0.108732	-0.0511673	-0.00105205	0.00763174	0.0151327	0.176575	0.353763	0.208585	0.0174646	0.276774	-0.170483	-0.021998	0.199794	0.0190566	-0.108866	10.5958	-0.0169319	0.0240382	0.00906159	0.0793889	0.00988785	0.137242	11.5864	high
GSM1855023	3.21644	0	-0.0548091	-0.118601	-0.048376	-0.00100088	0.00786519	0.0153223	0.149355	0.32801	0.248629	0.0195736	0.304513	-0.153975	-0.0216518	0.213333	0.0211968	-0.0929481	10.5233	-0.0142807	0.0176405	0.00923415	0.0867123	0.00981164	0.138728	11.5875	high
GSM1855066	2.73151	0	-0.0595184	-0.106859	-0.0497321	-0.00107029	0.00790163	0.0151094	0.167838	0.353766	0.260378	0.0186522	0.281681	-0.301648	-0.0179739	0.23315	0.0209966	-0.121772	10.6424	-0.0136023	0.0217117	0.00939836	0.0827261	0.00954487	0.153466	11.6066	high
GSM1855064	2.68493	0	-0.0577766	-0.10834	-0.0499076	-0.00106751	0.00765685	0.0158033	0.161506	0.335077	0.28391	0.0193131	0.284594	-0.392692	-0.0207559	0.220214	0.0202955	-0.122622	10.7582	-0.0145715	0.0176418	0.00952943	0.087141	0.00985858	0.150422	11.6134	high
GSM1854805	2.28219	0	-0.0516443	-0.10408	-0.0512191	-0.000943595	0.00789932	0.0159179	0.160653	0.350842	0.220671	0.0198707	0.284289	-0.170542	-0.0199638	0.246722	0.0199544	-0.115601	10.5767	-0.0142191	0.0176613	0.00952855	0.0869315	0.0101895	0.146723	11.6463	high
GSM1854973	2.50137	0	-0.0661466	-0.11799	-0.0528963	-0.00108955	0.00799945	0.0148529	0.149182	0.346128	0.247711	0.0179111	0.28464	-0.160178	-0.0206739	0.169589	0.0212638	-0.126014	10.6618	-0.0147647	0.0230044	0.00934101	0.091093	0.00960383	0.153176	11.6475	high
GSM1854807	1.43562	1	-0.056264	-0.108362	-0.0497811	-0.00102544	0.00733766	0.0153846	0.155203	0.338289	0.246284	0.0175969	0.267809	-0.509488	-0.0206768	0.207448	0.0189426	-0.120999	11.0045	-0.0153716	0.0181897	0.00918951	0.0817797	0.00969013	0.138711	11.6544	high
GSM1855011	2.7726	0	-0.0670678	-0.120483	-0.0489432	-0.00112006	0.00761292	0.0158746	0.142855	0.350715	0.258471	0.0189675	0.302417	-0.208991	-0.0273303	0.241788	0.0206197	-0.112526	10.62	-0.0155834	0.0200342	0.00906346	0.0868113	0.00975576	0.152326	11.6553	high
GSM1854981	1.61918	1	-0.0519688	-0.104895	-0.0488475	-0.00102731	0.00763264	0.0169408	0.131567	0.380676	0.414953	0.019557	0.274177	-0.506476	-0.0182857	0.207663	0.0202693	-0.148106	10.835	-0.0122257	0.0161148	0.00925588	0.0689523	0.00946326	0.144031	11.6644	high
GSM1855020	3.25753	0	-0.0617742	-0.113387	-0.0516486	-0.0010222	0.00789005	0.0149588	0.166194	0.36124	0.363748	0.0192266	0.29107	-0.15721	-0.0200581	0.205905	0.0204205	-0.101018	10.4628	-0.0141422	0.0210897	0.00938489	0.0736937	0.0101807	0.160937	11.6684	high
GSM1855016	2.72329	0	-0.0533569	-0.112871	-0.0494418	-0.00105746	0.00803645	0.0172109	0.158646	0.319555	0.227809	0.0183761	0.292577	-0.207509	-0.0223587	0.205255	0.0194068	-0.112896	10.7179	-0.0156397	0.0215791	0.00923475	0.0798463	0.00970377	0.144232	11.6743	high
GSM1854806	2.4411	0	-0.0641167	-0.10829	-0.0502964	-0.00108294	0.00762006	0.0149212	0.15527	0.354796	0.243653	0.017517	0.279291	-0.315402	-0.0179265	0.187701	0.0202935	-0.135724	10.8634	-0.0145481	0.0202609	0.00896489	0.0881453	0.00925746	0.119631	11.6834	high
GSM1855136	0.0109589	1	-0.0610424	-0.117201	-0.0471637	-0.00106269	0.00766184	0.0139421	0.135042	0.351337	0.248155	0.0186761	0.27274	-0.180934	-0.0192497	0.233105	0.0200222	-0.11875	10.6805	-0.0138202	0.0238102	0.00889154	0.0882276	0.00948319	0.131972	11.6843	high
GSM1854921	0.136986	1	-0.0542383	-0.110655	-0.049173	-0.00104949	0.00780986	0.0155523	0.119337	0.344809	0.254743	0.0197928	0.291436	-0.218001	-0.0225513	0.229709	0.0213622	-0.094214	10.6684	-0.0144972	0.0205473	0.00949967	0.0787652	0.0102307	0.157499	11.6852	high
GSM1855129	1.72055	0	-0.061908	-0.108947	-0.0496934	-0.00110682	0.00751627	0.014097	0.166898	0.354162	0.247897	0.018046	0.269365	-0.157489	-0.019908	0.216864	0.0197683	-0.133621	10.6568	-0.013962	0.0187172	0.00885024	0.0922965	0.00958981	0.132662	11.6869	high
GSM1855217	4.25753	0	-0.0680683	-0.111221	-0.0498399	-0.0010917	0.00753082	0.0142451	0.168088	0.379598	0.257566	0.0175014	0.282548	-0.272144	-0.0163	0.196547	0.0200057	-0.137878	10.7585	-0.0147093	0.0232504	0.00886714	0.0877628	0.00969132	0.12702	11.6875	high
GSM1855166	1.86027	0	-0.0571152	-0.109391	-0.0493877	-0.00102652	0.00771111	0.0165267	0.141747	0.320733	0.255662	0.0188593	0.286388	-0.155104	-0.0210033	0.23717	0.0206277	-0.109155	10.6372	-0.0136909	0.0228745	0.00934507	0.0829136	0.00988753	0.138023	11.6898	high
GSM1855211	4.4274	0	-0.0575478	-0.112698	-0.0509432	-0.00103295	0.00757574	0.0148918	0.168114	0.375242	0.379916	0.0180174	0.296387	-0.220598	-0.0205641	0.180446	0.020385	-0.10164	10.5458	-0.0146828	0.0226237	0.00918006	0.085127	0.00966289	0.147643	11.7013	high
GSM1854970	1.07397	0	-0.0547016	-0.107748	-0.0500662	-0.00099857	0.00752317	0.015367	0.15444	0.354066	0.28304	0.0183146	0.272495	-0.175392	-0.0183718	0.218771	0.0191197	-0.123135	10.6394	-0.0134488	0.0201538	0.00887247	0.0748726	0.00972417	0.151793	11.7041	high
GSM1855142	2.27671	0	-0.0629157	-0.120544	-0.0507305	-0.00102497	0.00789397	0.0149019	0.157261	0.358626	0.237755	0.0194476	0.295161	-0.152795	-0.0229871	0.183942	0.0213161	-0.113401	10.7033	-0.0158183	0.0190254	0.0093276	0.0823699	0.00937357	0.136588	11.7161	high
GSM1854855	0.841096	1	-0.0640707	-0.103431	-0.0502521	-0.00104474	0.00791317	0.0161374	0.164382	0.353603	0.254481	0.0205741	0.281812	-0.282495	-0.0205985	0.239148	0.021229	-0.116239	10.7406	-0.0128508	0.0183691	0.00924551	0.0933803	0.00981078	0.138429	11.7181	high
GSM1854941	1.88767	0	-0.0556154	-0.114885	-0.051807	-0.00100514	0.00742434	0.0149258	0.159996	0.387756	0.222467	0.0207363	0.291397	-0.162197	-0.020778	0.188247	0.0199381	-0.10919	10.6902	-0.0161232	0.0186606	0.00855311	0.0629253	0.0100932	0.148913	11.7207	high
GSM1855219	0.591781	1	-0.0538976	-0.107831	-0.0524699	-0.00112513	0.00789142	0.0156906	0.162719	0.371492	0.354876	0.0184444	0.293308	-0.15413	-0.0197994	0.231942	0.0208152	-0.11977	10.5018	-0.0149461	0.0215219	0.00922248	0.0937507	0.00949443	0.139918	11.7289	high
GSM1855081	2.12877	0	-0.0548085	-0.114771	-0.0504866	-0.0010493	0.00755664	0.0151889	0.14494	0.352959	0.226179	0.0179235	0.286154	-0.204107	-0.0203507	0.17859	0.0195352	-0.122493	10.8006	-0.0137333	0.0245217	0.00897675	0.086961	0.00937296	0.144558	11.7422	high
GSM1854810	2.53425	0	-0.0579449	-0.109208	-0.0510514	-0.00104486	0.00768527	0.0160694	0.152655	0.347307	0.233409	0.0194646	0.278288	-0.180408	-0.0228645	0.216296	0.0200215	-0.115429	10.7302	-0.0139281	0.0219832	0.00918295	0.0866776	0.0097375	0.148339	11.7454	high
GSM1855180	1.51781	0	-0.0568535	-0.113194	-0.0483317	-0.00103408	0.00746162	0.0145363	0.163384	0.369202	0.247884	0.017438	0.287386	-0.169451	-0.0179706	0.226276	0.0202732	-0.130592	10.7007	-0.0143388	0.0202932	0.00905554	0.0869531	0.00918621	0.118337	11.7466	high
GSM1854802	2.52603	1	-0.0618473	-0.118436	-0.0509209	-0.000943745	0.00772343	0.0150222	0.161431	0.351497	0.230184	0.0188287	0.282593	-0.165557	-0.0204937	0.206578	0.0207491	-0.109457	10.7375	-0.015068	0.0214484	0.00917609	0.0786744	0.00950695	0.144423	11.7526	high
GSM1854999	2.45753	0	-0.0586798	-0.112681	-0.0515707	-0.00104376	0.00766487	0.014204	0.158329	0.367519	0.258917	0.0180977	0.27216	-0.150908	-0.0244484	0.222061	0.0203141	-0.119354	10.6936	-0.0156295	0.0208033	0.00917461	0.0775982	0.00967472	0.139464	11.7553	high
GSM1855135	1.47671	0	-0.0569291	-0.107165	-0.050332	-0.000987875	0.00772153	0.0131945	0.14278	0.367382	0.219812	0.0188761	0.288969	-0.221048	-0.019368	0.224418	0.0197632	-0.122103	10.7904	-0.014207	0.0235467	0.00916272	0.0764761	0.00984475	0.148492	11.7687	high
GSM1854956	1.26027	1	-0.0437755	-0.111793	-0.0496416	-0.000983069	0.00738332	0.0132431	0.186583	0.330006	0.227642	0.0201122	0.274123	-0.138432	-0.0217467	0.164756	0.020196	-0.103457	10.7411	-0.0133036	0.0141221	0.00863498	0.0786013	0.00961123	0.156898	11.7699	high
GSM1854988	2.15068	0	-0.0598018	-0.107211	-0.0510609	-0.00113617	0.00772822	0.0145586	0.171346	0.351109	0.412202	0.0178438	0.28396	-0.346096	-0.0231234	0.222384	0.0200857	-0.128346	10.7615	-0.0143265	0.0212821	0.00927504	0.0893147	0.00980632	0.12894	11.7902	high
GSM1854882	1.52603	0	-0.0560699	-0.124543	-0.0495595	-0.00101637	0.0075872	0.0151929	0.173454	0.358449	0.261007	0.0195457	0.285879	-0.148959	-0.0213103	0.157934	0.02024	-0.118514	10.7895	-0.0142693	0.0167358	0.0087383	0.0754147	0.00950697	0.137685	11.8026	high
GSM1855210	5.04932	0	-0.0529969	-0.11358	-0.0489048	-0.00111287	0.00746434	0.0156814	0.168403	0.36325	0.241051	0.0182367	0.28173	-0.21491	-0.0223305	0.180596	0.0204101	-0.12517	10.8564	-0.0145683	0.0159278	0.00909837	0.0802728	0.00959303	0.144998	11.8195	high
GSM1855062	1.64384	1	-0.0545953	-0.11152	-0.0497674	-0.00104634	0.00786668	0.015398	0.143767	0.318182	0.239217	0.0185835	0.295334	-0.132236	-0.0249151	0.219162	0.0214651	-0.106991	10.786	-0.0141481	0.022178	0.00974335	0.0795678	0.00970556	0.15363	11.8446	high
GSM1854823	2.18904	0	-0.0568044	-0.111843	-0.0485114	-0.00101033	0.00742052	0.016335	0.150286	0.379211	0.221607	0.0198128	0.263157	-0.147256	-0.0195618	0.18231	0.0199059	-0.103765	10.8342	-0.0158847	0.0176883	0.00908104	0.0811104	0.00991762	0.141363	11.8487	high
GSM1855188	3.71781	1	-0.0657192	-0.119706	-0.0503569	-0.00111193	0.00769487	0.0143944	0.163821	0.349566	0.246691	0.0177792	0.284065	-0.167398	-0.0228722	0.210165	0.0202253	-0.124419	10.8624	-0.0150803	0.0227896	0.00909114	0.0871672	0.00934083	0.120295	11.8588	high
GSM1855232	2.08767	1	-0.0532625	-0.112502	-0.0501964	-0.00103299	0.00780383	0.0150703	0.168671	0.347565	0.230298	0.0183562	0.282664	-0.175436	-0.0242529	0.249375	0.0210793	-0.11542	10.8055	-0.0143888	0.0232564	0.00971786	0.0842444	0.00957007	0.141218	11.8679	high
GSM1854803	2.6274	0	-0.0570384	-0.11151	-0.0524493	-0.00115258	0.00765737	0.0147712	0.159902	0.348932	0.361365	0.0177648	0.280532	-0.34527	-0.0268497	0.208625	0.0201836	-0.133312	10.957	-0.0143496	0.0187539	0.00921962	0.0661746	0.00987305	0.134267	11.8731	high
GSM1855138	1.69589	0	-0.0593158	-0.113917	-0.0507423	-0.0010263	0.00775173	0.0144796	0.132401	0.380566	0.253644	0.0202451	0.271255	-0.148024	-0.0213266	0.145656	0.0208445	-0.113656	10.8972	-0.0136852	0.0172368	0.00909413	0.0722506	0.00992458	0.14937	11.8802	high
GSM1855091	2.56438	1	-0.0547539	-0.102389	-0.0508007	-0.000996539	0.00790279	0.0141859	0.166042	0.354854	0.334496	0.0187018	0.279174	-0.298863	-0.0234973	0.25825	0.0205571	-0.127733	10.8579	-0.0144959	0.0225187	0.0094136	0.0868203	0.00973285	0.129286	11.8963	high
GSM1855193	0.956164	0	-0.0531031	-0.113118	-0.0506039	-0.00105195	0.00757864	0.0145075	0.142182	0.34546	0.258438	0.0182152	0.292546	-0.159649	-0.0236244	0.191638	0.0203984	-0.0972978	10.8563	-0.0153754	0.0232598	0.0091788	0.0840095	0.00968477	0.140053	11.8996	high
GSM1855183	4.63562	0	-0.0630438	-0.117018	-0.0506497	-0.0010548	0.00752926	0.0151781	0.156629	0.338438	0.206611	0.0179039	0.274465	-0.16373	-0.0188503	0.164881	0.0192645	-0.126522	10.9988	-0.0154217	0.0172873	0.00891358	0.0912	0.00913803	0.132007	11.9019	high
GSM1855070	2.72329	0	-0.0633438	-0.11374	-0.0509692	-0.00111225	0.00785149	0.0134933	0.163191	0.354004	0.221129	0.0174388	0.265111	-0.190064	-0.021659	0.205268	0.0201786	-0.1224	11.0106	-0.0141381	0.0197097	0.00914429	0.0829549	0.0100318	0.127889	11.9506	high
GSM1855065	1.98356	0	-0.0599364	-0.109778	-0.0509674	-0.00100426	0.0076598	0.0137973	0.156926	0.345964	0.263197	0.0184184	0.300467	-0.156419	-0.0164438	0.239651	0.0204523	-0.127031	10.8786	-0.0151189	0.0196084	0.00905628	0.0847467	0.00972783	0.129044	11.9606	high
GSM1854860	1.19452	1	-0.0569047	-0.107455	-0.0491208	-0.00110416	0.00773971	0.0152684	0.172462	0.345722	0.350604	0.0184733	0.272699	-0.200319	-0.0195655	0.247167	0.0207969	-0.129962	10.8298	-0.0138688	0.0225477	0.00919277	0.0805105	0.00935323	0.137499	11.9616	high
GSM1854896	2.86301	1	-0.0581283	-0.108288	-0.0502591	-0.00109935	0.00768924	0.0150043	0.173333	0.34457	0.299929	0.0180096	0.290619	-0.179756	-0.0235294	0.232334	0.0197737	-0.129097	10.9019	-0.0139178	0.0207428	0.00911461	0.0827081	0.0100742	0.126838	11.9886	high
GSM1855060	2.83014	0	-0.0538898	-0.107227	-0.0487655	-0.000944842	0.00762827	0.0143123	0.14835	0.367571	0.254759	0.0199809	0.291876	-0.148884	-0.0208549	0.219834	0.0202876	-0.117799	10.9098	-0.0136201	0.0209636	0.00919036	0.0873175	0.00973796	0.156337	12.026	high
GSM1855126	1.58082	0	-0.0604954	-0.107233	-0.046152	-0.001119	0.00782613	0.0145244	0.147093	0.358206	0.309879	0.0179625	0.284847	-0.149586	-0.0194474	0.223652	0.020555	-0.110327	10.9254	-0.0146946	0.0198035	0.00903174	0.0797344	0.00969821	0.129635	12.0488	high
GSM1855137	1.52603	0	-0.066329	-0.113153	-0.0496705	-0.00108367	0.00789968	0.0138546	0.179853	0.357005	0.243823	0.0193305	0.281326	-0.26826	-0.0206293	0.216342	0.0207848	-0.114006	11.113	-0.0141418	0.0215336	0.00912805	0.0855067	0.00975992	0.138618	12.0705	high
GSM1855174	1.47945	0	-0.0595352	-0.114012	-0.0507695	-0.0010382	0.00746309	0.0143264	0.153455	0.378214	0.2388	0.0193233	0.282437	-0.219715	-0.0185012	0.22166	0.0194892	-0.121743	11.1006	-0.0148737	0.018185	0.00882065	0.0831886	0.00982745	0.131781	12.0873	high
GSM1855044	2.70411	0	-0.0642928	-0.109413	-0.0481675	-0.00115095	0.00756719	0.0151553	0.14475	0.349582	0.272242	0.018055	0.265907	-0.196867	-0.0207736	0.21546	0.0198173	-0.129103	11.1208	-0.0135175	0.0240061	0.00908344	0.0822232	0.00954909	0.138157	12.1091	high
GSM1854812	0.0657534	0	-0.0571778	-0.108158	-0.0504785	-0.00113358	0.0075001	0.0152338	0.183981	0.361168	0.384755	0.0184035	0.28817	-0.364594	-0.0183048	0.222131	0.0191806	-0.136155	11.1401	-0.0136022	0.0217615	0.00899868	0.0904465	0.00950264	0.122399	12.1441	high
GSM1855163	2.37534	0	-0.0603529	-0.115206	-0.0491061	-0.00104047	0.00730195	0.015781	0.16063	0.335927	0.252007	0.0187765	0.287794	-0.162706	-0.0211812	0.155142	0.0204725	-0.115249	11.1765	-0.0140482	0.0177121	0.0089313	0.0860837	0.00885062	0.144845	12.1579	high
GSM1855071	1.63562	0	-0.0553678	-0.109056	-0.0505155	-0.00107849	0.00764185	0.0143694	0.181145	0.366468	0.362537	0.0178546	0.27735	-0.1604	-0.0219228	0.234339	0.0201345	-0.129966	11.0924	-0.014019	0.0222248	0.00905335	0.0916819	0.00986047	0.138083	12.3028	high
GSM1855094	1.66301	0	-0.0603154	-0.111281	-0.0523401	-0.0010007	0.00786383	0.0150119	0.149822	0.376546	0.287416	0.0185577	0.274982	-0.372707	-0.0206833	0.268401	0.0209207	-0.103687	11.4395	-0.0157913	0.0209375	0.00915943	0.0752897	0.00961643	0.150909	12.3871	high
GSM1854837	0.126027	1	-0.0601351	-0.10953	-0.0504075	-0.0011232	0.00779928	0.016119	0.181535	0.373284	0.318627	0.0187707	0.288747	-0.183165	-0.0191556	0.229071	0.0198151	-0.114505	11.3011	-0.0152034	0.0214169	0.00900511	0.07833	0.00937071	0.147517	12.4673	high
GSM1855225	2.8411	1	-0.0682267	-0.116979	-0.0497514	-0.00109863	0.00772284	0.0148177	0.180713	0.354152	0.2125	0.0214352	0.293317	-0.170815	-0.0213043	0.175125	0.0212049	-0.0853082	11.6708	-0.0140589	0.013083	0.00929451	0.0763667	0.00896169	0.163506	12.6955	high
GSM1855171	3.16438	0	-0.0549301	-0.109418	-0.0492163	-0.00105519	0.00776669	0.0147136	0.156368	0.359354	0.252408	0.0196806	0.287869	-0.168886	-0.0214374	0.217218	0.019878	-0.113044	11.6999	-0.0148559	0.0189668	0.0093753	0.0828558	0.00991971	0.161843	12.7853	high
GSM1855033	2.76986	0	-0.0527464	-0.114868	-0.0487722	-0.000958372	0.00793157	0.0145474	0.159339	0.331804	0.29454	0.019788	0.289037	-0.161316	-0.0229493	0.176849	0.0192226	-0.100877	11.8519	-0.0147281	0.017627	0.00948433	0.0838057	0.00903154	0.172177	12.9398	high
