# Supplementary material for: A model of twenty-three metabolic-related genes predicting overall survival for lung adenocarcinoma
Source: PeerJ. 2020 Sep 24;8:e10008. doi: 10.7717/peerj.10008 (PMC7520091; doi:10.7717/peerj.10008)
Supplement: Supplemental Information 12 [file peerj-08-10008-s012.xls]

## Sheet: Sheet1
Low Risk	SIZE	ES	NES	NOM p-val	FDR q-val
KEGG_ASTHMA	28	-0.801598	-2.03889	0	0.0404092
KEGG_ARACHIDONIC_ACID_METABOLISM	58	-0.558234	-1.95604	0.00207469	0.0565172
KEGG_PRIMARY_BILE_ACID_BIOSYNTHESIS	16	-0.659944	-1.87598	0.00625	0.10133
KEGG_INTESTINAL_IMMUNE_NETWORK_FOR_IGA_PRODUCTION	46	-0.696743	-1.84649	0.0219124	0.104648
KEGG_HEMATOPOIETIC_CELL_LINEAGE	85	-0.563089	-1.77325	0.0399202	0.162407
KEGG_AUTOIMMUNE_THYROID_DISEASE	50	-0.601639	-1.74941	0.029703	0.161931
KEGG_CELL_ADHESION_MOLECULES_CAMS	131	-0.512137	-1.74172	0.0335968	0.146648
KEGG_VASCULAR_SMOOTH_MUSCLE_CONTRACTION	115	-0.436089	-1.74035	0.00988142	0.129479
KEGG_GLYCEROPHOSPHOLIPID_METABOLISM	77	-0.434753	-1.7386	0.00790514	0.116723
KEGG_ALDOSTERONE_REGULATED_SODIUM_REABSORPTION	42	-0.494275	-1.7015	0.010142	0.135318
KEGG_FC_EPSILON_RI_SIGNALING_PATHWAY	79	-0.449459	-1.68705	0.028866	0.134567
KEGG_ALPHA_LINOLENIC_ACID_METABOLISM	19	-0.568019	-1.67229	0.0187891	0.136161
KEGG_ALLOGRAFT_REJECTION	35	-0.692683	-1.6607	0.062249	0.135165
KEGG_PEROXISOME	78	-0.474874	-1.65781	0.0305499	0.128006
KEGG_FATTY_ACID_METABOLISM	42	-0.516855	-1.63476	0.0483193	0.138057
High Risk
KEGG_CELL_CYCLE	124	0.746107	2.38431	0	0.000714286
KEGG_OOCYTE_MEIOSIS	112	0.584582	2.19071	0	0.00863054
KEGG_PYRIMIDINE_METABOLISM	98	0.620018	2.15973	0	0.00795132
KEGG_RNA_DEGRADATION	59	0.647866	2.15945	0	0.00596349
KEGG_MISMATCH_REPAIR	23	0.852058	2.14863	0	0.00515783
KEGG_UBIQUITIN_MEDIATED_PROTEOLYSIS	134	0.540554	2.14447	0	0.00429819
KEGG_HOMOLOGOUS_RECOMBINATION	28	0.781809	2.11144	0	0.00630121
KEGG_P53_SIGNALING_PATHWAY	68	0.54636	2.09974	0.00192308	0.00635768
KEGG_DNA_REPLICATION	36	0.879233	2.07938	0	0.00659707
KEGG_NUCLEOTIDE_EXCISION_REPAIR	44	0.686667	2.0731	0	0.00619748
KEGG_AMINOACYL_TRNA_BIOSYNTHESIS	41	0.711926	2.04671	0.00604839	0.00798758
KEGG_PENTOSE_PHOSPHATE_PATHWAY	27	0.684247	2.0257	0	0.00939397
KEGG_GLYCOLYSIS_GLUCONEOGENESIS	62	0.586403	1.93601	0	0.0232731
KEGG_N_GLYCAN_BIOSYNTHESIS	46	0.562113	1.92174	0.0100402	0.0243588
KEGG_CYSTEINE_AND_METHIONINE_METABOLISM	34	0.597873	1.90888	0.00196078	0.0253013
