# Supplementary material for: A model of twenty-three metabolic-related genes predicting overall survival for lung adenocarcinoma
Source: PeerJ. 2020 Sep 24;8:e10008. doi: 10.7717/peerj.10008 (PMC7520091; doi:10.7717/peerj.10008)
Supplement: Supplemental Information 13 [file peerj-08-10008-s013.xls]

## Sheet: Sheet1
ONTOLOGY	ID	Description	GeneRatio	BgRatio	pvalue	p.adjust	qvalue	geneID	Count
BP	GO:0009165	nucleotide biosynthetic process	44128	386/18670	1.92589e-11	5.48913e-09	2.29999e-09	ADCY9/AK2/ALDOA/CTPS2/GMPS/HK3/PKM/PTGIS/TYMS/LDHA	10
BP	GO:1901293	nucleoside phosphate biosynthetic process	44128	390/18670	2.1317e-11	5.48913e-09	2.29999e-09	ADCY9/AK2/ALDOA/CTPS2/GMPS/HK3/PKM/PTGIS/TYMS/LDHA	10
BP	GO:0034404	nucleobase-containing small molecule biosynthetic process	44067	226/18670	2.53533e-10	4.35232e-08	1.82366e-08	ALDOA/CTPS2/ENTPD2/GMPS/HK3/NT5E/PKM/LDHA	8
BP	GO:0019674	NAD metabolic process	44006	76/18670	4.72464e-10	6.08297e-08	2.54882e-08	ALDOA/HK3/NT5E/PKM/PTGIS/LDHA	6
BP	GO:0009260	ribonucleotide biosynthetic process	44067	293/18670	1.97815e-09	2.03749e-07	8.53727e-08	ADCY9/AK2/ALDOA/CTPS2/GMPS/HK3/PKM/LDHA	8
BP	GO:0046390	ribose phosphate biosynthetic process	44067	300/18670	2.38193e-09	2.04449e-07	8.5666e-08	ADCY9/AK2/ALDOA/CTPS2/GMPS/HK3/PKM/LDHA	8
BP	GO:0072522	purine-containing compound biosynthetic process	44067	313/18670	3.32408e-09	2.44557e-07	1.02472e-07	ADCY9/AK2/ALDOA/GMPS/HK3/NT5E/PKM/LDHA	8
BP	GO:0009124	nucleoside monophosphate biosynthetic process	44036	208/18670	5.67507e-09	3.65332e-07	1.53077e-07	AK2/ALDOA/GMPS/HK3/PKM/TYMS/LDHA	7
BP	GO:0009123	nucleoside monophosphate metabolic process	44067	375/18670	1.36549e-08	7.6168e-07	3.19151e-07	AK2/ALDOA/GMPS/HK3/NT5E/PKM/TYMS/LDHA	8
BP	GO:0009135	purine nucleoside diphosphate metabolic process	44006	138/18670	1.76378e-08	7.6168e-07	3.19151e-07	AK2/ALDOA/ENTPD2/HK3/PKM/LDHA	6
BP	GO:0009179	purine ribonucleoside diphosphate metabolic process	44006	138/18670	1.76378e-08	7.6168e-07	3.19151e-07	AK2/ALDOA/ENTPD2/HK3/PKM/LDHA	6
BP	GO:0046434	organophosphate catabolic process	44036	248/18670	1.914e-08	7.6168e-07	3.19151e-07	ALDOA/ENTPD2/HK3/INPP5A/NT5E/PKM/LDHA	7
BP	GO:0009185	ribonucleoside diphosphate metabolic process	44006	140/18670	1.92269e-08	7.6168e-07	3.19151e-07	AK2/ALDOA/ENTPD2/HK3/PKM/LDHA	6
BP	GO:0006732	coenzyme metabolic process	44067	403/18670	2.38976e-08	8.79091e-07	3.68347e-07	AKR1A1/ALDOA/HK3/NT5E/PKM/PTGIS/TYMS/LDHA	8
BP	GO:0009132	nucleoside diphosphate metabolic process	44006	158/18670	3.96302e-08	1.36064e-06	5.70119e-07	AK2/ALDOA/ENTPD2/HK3/PKM/LDHA	6
BP	GO:0009152	purine ribonucleotide biosynthetic process	44036	280/18670	4.40534e-08	1.41797e-06	5.94141e-07	ADCY9/AK2/ALDOA/GMPS/HK3/PKM/LDHA	7
BP	GO:0044282	small molecule catabolic process	44067	445/18670	5.1469e-08	1.55921e-06	6.53321e-07	AKR1A1/ALDH2/ALDOA/ENTPD2/HK3/INPP5A/NT5E/PKM	8
BP	GO:0006164	purine nucleotide biosynthetic process	44036	300/18670	7.06208e-08	2.02054e-06	8.46623e-07	ADCY9/AK2/ALDOA/GMPS/HK3/PKM/LDHA	7
BP	GO:0009127	purine nucleoside monophosphate biosynthetic process	44006	183/18670	9.49568e-08	2.44514e-06	1.02453e-06	AK2/ALDOA/GMPS/HK3/PKM/LDHA	6
BP	GO:0009168	purine ribonucleoside monophosphate biosynthetic process	44006	183/18670	9.49568e-08	2.44514e-06	1.02453e-06	AK2/ALDOA/GMPS/HK3/PKM/LDHA	6
BP	GO:0009142	nucleoside triphosphate biosynthetic process	44006	188/18670	1.11411e-07	2.46702e-06	1.0337e-06	ALDOA/CTPS2/HK3/PKM/TYMS/LDHA	6
BP	GO:1901292	nucleoside phosphate catabolic process	44006	188/18670	1.11411e-07	2.46702e-06	1.0337e-06	ALDOA/ENTPD2/HK3/NT5E/PKM/LDHA	6
BP	GO:0019362	pyridine nucleotide metabolic process	44006	189/18670	1.14968e-07	2.46702e-06	1.0337e-06	ALDOA/HK3/NT5E/PKM/PTGIS/LDHA	6
BP	GO:0046496	nicotinamide nucleotide metabolic process	44006	189/18670	1.14968e-07	2.46702e-06	1.0337e-06	ALDOA/HK3/NT5E/PKM/PTGIS/LDHA	6
BP	GO:0051188	cofactor biosynthetic process	44036	326/18670	1.24442e-07	2.5635e-06	1.07413e-06	AKR1A1/ALDOA/HK3/MAOB/PKM/PTGIS/LDHA	7
BP	GO:0072524	pyridine-containing compound metabolic process	44006	195/18670	1.38334e-07	2.74007e-06	1.14811e-06	ALDOA/HK3/NT5E/PKM/PTGIS/LDHA	6
BP	GO:0009156	ribonucleoside monophosphate biosynthetic process	44006	197/18670	1.4694e-07	2.80275e-06	1.17438e-06	AK2/ALDOA/GMPS/HK3/PKM/LDHA	6
BP	GO:0016052	carbohydrate catabolic process	44006	199/18670	1.55983e-07	2.86898e-06	1.20213e-06	AKR1A1/ALDOA/HK3/NEU1/PKM/LDHA	6
BP	GO:0009167	purine ribonucleoside monophosphate metabolic process	44036	340/18670	1.656e-07	2.90003e-06	1.21514e-06	AK2/ALDOA/GMPS/HK3/NT5E/PKM/LDHA	7
BP	GO:0009126	purine nucleoside monophosphate metabolic process	44036	341/18670	1.68934e-07	2.90003e-06	1.21514e-06	AK2/ALDOA/GMPS/HK3/NT5E/PKM/LDHA	7
BP	GO:0006733	oxidoreduction coenzyme metabolic process	44006	207/18670	1.96871e-07	3.27059e-06	1.37041e-06	ALDOA/HK3/NT5E/PKM/PTGIS/LDHA	6
BP	GO:0009161	ribonucleoside monophosphate metabolic process	44036	354/18670	2.1772e-07	3.50394e-06	1.46818e-06	AK2/ALDOA/GMPS/HK3/NT5E/PKM/LDHA	7
BP	GO:0009141	nucleoside triphosphate metabolic process	44036	362/18670	2.53284e-07	3.95277e-06	1.65624e-06	AK2/ALDOA/CTPS2/HK3/PKM/TYMS/LDHA	7
BP	GO:0046031	ADP metabolic process	43975	126/18670	4.95741e-07	7.50901e-06	3.14634e-06	AK2/ALDOA/HK3/PKM/LDHA	5
BP	GO:0009435	NAD biosynthetic process	43945	56/18670	7.37534e-07	1.08523e-05	4.5472e-06	ALDOA/HK3/PKM/PTGIS	4
BP	GO:0009108	coenzyme biosynthetic process	44006	261/18670	7.67881e-07	1.0985e-05	4.6028e-06	AKR1A1/ALDOA/HK3/PKM/PTGIS/LDHA	6
BP	GO:0019359	nicotinamide nucleotide biosynthetic process	43975	147/18670	1.06479e-06	1.44307e-05	6.04657e-06	ALDOA/HK3/PKM/PTGIS/LDHA	5
BP	GO:0019363	pyridine nucleotide biosynthetic process	43975	147/18670	1.06479e-06	1.44307e-05	6.04657e-06	ALDOA/HK3/PKM/PTGIS/LDHA	5
BP	GO:0072525	pyridine-containing compound biosynthetic process	43975	150/18670	1.17659e-06	1.55371e-05	6.51016e-06	ALDOA/HK3/PKM/PTGIS/LDHA	5
BP	GO:0046365	monosaccharide catabolic process	43945	67/18670	1.52467e-06	1.96301e-05	8.22518e-06	AKR1A1/ALDOA/HK3/PKM	4
BP	GO:0009201	ribonucleoside triphosphate biosynthetic process	43975	177/18670	2.65798e-06	3.33868e-05	1.39894e-05	ALDOA/CTPS2/HK3/PKM/LDHA	5
BP	GO:0009166	nucleotide catabolic process	43975	182/18670	3.04704e-06	3.73625e-05	1.56552e-05	ALDOA/HK3/NT5E/PKM/LDHA	5
BP	GO:0009199	ribonucleoside triphosphate metabolic process	44006	341/18670	3.62182e-06	4.33776e-05	1.81756e-05	AK2/ALDOA/CTPS2/HK3/PKM/LDHA	6
BP	GO:0006735	NADH regeneration	43914	27/18670	5.34968e-06	5.97322e-05	2.50283e-05	ALDOA/HK3/PKM	3
BP	GO:0061621	canonical glycolysis	43914	27/18670	5.34968e-06	5.97322e-05	2.50283e-05	ALDOA/HK3/PKM	3
BP	GO:0061718	glucose catabolic process to pyruvate	43914	27/18670	5.34968e-06	5.97322e-05	2.50283e-05	ALDOA/HK3/PKM	3
BP	GO:0097164	ammonium ion metabolic process	43975	205/18670	5.45129e-06	5.97322e-05	2.50283e-05	AKR1A1/CHPT1/MAOB/MBOAT1/SMS	5
BP	GO:0061615	glycolytic process through fructose-6-phosphate	43914	28/18670	5.98659e-06	6.29203e-05	2.63641e-05	ALDOA/HK3/PKM	3
BP	GO:0061620	glycolytic process through glucose-6-phosphate	43914	28/18670	5.98659e-06	6.29203e-05	2.63641e-05	ALDOA/HK3/PKM	3
BP	GO:0015949	nucleobase-containing small molecule interconversion	43914	29/18670	6.67172e-06	6.87187e-05	2.87937e-05	AK2/CTPS2/TYMS	3
BP	GO:0042455	ribonucleoside biosynthetic process	43914	35/18670	1.189e-05	0.000120065	5.03084e-05	CTPS2/GMPS/NT5E	3
BP	GO:0006007	glucose catabolic process	43914	36/18670	1.29599e-05	0.00012586	5.27362e-05	ALDOA/HK3/PKM	3
BP	GO:0009112	nucleobase metabolic process	43914	36/18670	1.29599e-05	0.00012586	5.27362e-05	CTPS2/GMPS/TYMS	3
BP	GO:0006096	glycolytic process	43945	115/18670	1.31969e-05	0.00012586	5.27362e-05	ALDOA/HK3/PKM/LDHA	4
BP	GO:0006757	ATP generation from ADP	43945	116/18670	1.36565e-05	0.000127875	5.35806e-05	ALDOA/HK3/PKM/LDHA	4
BP	GO:0019318	hexose metabolic process	43975	249/18670	1.40032e-05	0.00012878	5.39599e-05	AKR1A1/ALDOA/B4GALT1/HK3/PKM	5
BP	GO:0042866	pyruvate biosynthetic process	43945	119/18670	1.51062e-05	0.000136486	5.71888e-05	ALDOA/HK3/PKM/LDHA	4
BP	GO:0006734	NADH metabolic process	43914	40/18670	1.78729e-05	0.000158699	6.64963e-05	ALDOA/HK3/PKM	3
BP	GO:0046394	carboxylic acid biosynthetic process	44006	462/18670	2.04807e-05	0.000177952	7.45633e-05	AKR1A1/ALDOA/HK3/PKM/PTGIS/LDHA	6
BP	GO:0016053	organic acid biosynthetic process	44006	463/18670	2.07322e-05	0.000177952	7.45633e-05	AKR1A1/ALDOA/HK3/PKM/PTGIS/LDHA	6
BP	GO:0009163	nucleoside biosynthetic process	43914	43/18670	2.22684e-05	0.000188004	7.87753e-05	CTPS2/GMPS/NT5E	3
BP	GO:0006165	nucleoside diphosphate phosphorylation	43945	134/18670	2.41153e-05	0.000200312	8.39326e-05	ALDOA/HK3/PKM/LDHA	4
BP	GO:0046939	nucleotide phosphorylation	43945	136/18670	2.55608e-05	0.000208949	8.75515e-05	ALDOA/HK3/PKM/LDHA	4
BP	GO:1901659	glycosyl compound biosynthetic process	43914	47/18670	2.91602e-05	0.000234649	9.83198e-05	CTPS2/GMPS/NT5E	3
BP	GO:0005996	monosaccharide metabolic process	43975	292/18670	3.01167e-05	0.000238617	9.99827e-05	AKR1A1/ALDOA/B4GALT1/HK3/PKM	5
BP	GO:1901657	glycosyl compound metabolic process	43945	147/18670	3.46772e-05	0.000270587	0.000113378	AKR1A1/CTPS2/GMPS/NT5E	4
BP	GO:0046034	ATP metabolic process	43975	305/18670	3.70862e-05	0.000285066	0.000119445	AK2/ALDOA/HK3/PKM/LDHA	5
BP	GO:0006090	pyruvate metabolic process	43945	154/18670	4.15974e-05	0.000315039	0.000132004	ALDOA/HK3/PKM/LDHA	4
BP	GO:0006754	ATP biosynthetic process	43945	160/18670	4.82914e-05	0.000360436	0.000151026	ALDOA/HK3/PKM/LDHA	4
BP	GO:0019320	hexose catabolic process	43914	57/18670	5.21777e-05	0.000383879	0.000160848	ALDOA/HK3/PKM	3
BP	GO:0009205	purine ribonucleoside triphosphate metabolic process	43975	335/18670	5.79556e-05	0.000420382	0.000176144	AK2/ALDOA/HK3/PKM/LDHA	5
BP	GO:0009206	purine ribonucleoside triphosphate biosynthetic process	43945	171/18670	6.25656e-05	0.000445066	0.000186487	ALDOA/HK3/PKM/LDHA	4
BP	GO:0009144	purine nucleoside triphosphate metabolic process	43975	342/18670	6.39252e-05	0.000445066	0.000186487	AK2/ALDOA/HK3/PKM/LDHA	5
BP	GO:0009145	purine nucleoside triphosphate biosynthetic process	43945	172/18670	6.40002e-05	0.000445066	0.000186487	ALDOA/HK3/PKM/LDHA	4
BP	GO:0072330	monocarboxylic acid biosynthetic process	43975	343/18670	6.48154e-05	0.000445066	0.000186487	ALDOA/HK3/PKM/PTGIS/LDHA	5
BP	GO:1901616	organic hydroxy compound catabolic process	43914	74/18670	0.000113951	0.000772171	0.000323546	ALDH2/INPP5A/MAOB	3
BP	GO:0006006	glucose metabolic process	43945	209/18670	0.000136009	0.000909673	0.000381161	AKR1A1/ALDOA/HK3/PKM	4
BP	GO:0046033	AMP metabolic process	43885	14/18670	0.000142765	0.000942612	0.000394963	AK2/NT5E	2
BP	GO:0006206	pyrimidine nucleobase metabolic process	43885	16/18670	0.000187965	0.00122534	0.00051343	CTPS2/TYMS	2
BP	GO:0009119	ribonucleoside metabolic process	43914	98/18670	0.000262008	0.0016751	0.000701882	CTPS2/GMPS/NT5E	3
BP	GO:0009148	pyrimidine nucleoside triphosphate biosynthetic process	43885	19/18670	0.00026722	0.0016751	0.000701882	CTPS2/TYMS	2
BP	GO:0046112	nucleobase biosynthetic process	43885	19/18670	0.00026722	0.0016751	0.000701882	CTPS2/GMPS	2
BP	GO:0072527	pyrimidine-containing compound metabolic process	43914	99/18670	0.000269968	0.0016751	0.000701882	CTPS2/NT5E/TYMS	3
BP	GO:0043312	neutrophil degranulation	43975	485/18670	0.00032725	0.00200635	0.000840679	ALDOA/B4GALT1/HK3/NEU1/PKM	5
BP	GO:0002283	neutrophil activation involved in immune response	43975	488/18670	0.000336673	0.00203984	0.000854712	ALDOA/B4GALT1/HK3/NEU1/PKM	5
BP	GO:1901685	glutathione derivative metabolic process	43885	22/18670	0.000360133	0.00213182	0.000893251	AKR1A1/GSTA3	2
BP	GO:1901687	glutathione derivative biosynthetic process	43885	22/18670	0.000360133	0.00213182	0.000893251	AKR1A1/GSTA3	2
BP	GO:0042119	neutrophil activation	43975	498/18670	0.000369585	0.0021584	0.00090439	ALDOA/B4GALT1/HK3/NEU1/PKM	5
BP	GO:0002446	neutrophil mediated immunity	43975	499/18670	0.000373006	0.0021584	0.00090439	ALDOA/B4GALT1/HK3/NEU1/PKM	5
BP	GO:0006541	glutamine metabolic process	43885	23/18670	0.000394122	0.0021825	0.000914487	CTPS2/GMPS	2
BP	GO:0009147	pyrimidine nucleoside triphosphate metabolic process	43885	23/18670	0.000394122	0.0021825	0.000914487	CTPS2/TYMS	2
BP	GO:0042451	purine nucleoside biosynthetic process	43885	23/18670	0.000394122	0.0021825	0.000914487	GMPS/NT5E	2
BP	GO:0046129	purine ribonucleoside biosynthetic process	43885	23/18670	0.000394122	0.0021825	0.000914487	GMPS/NT5E	2
BP	GO:0009116	nucleoside metabolic process	43914	123/18670	0.00051044	0.00279656	0.00117178	CTPS2/GMPS/NT5E	3
BP	GO:0001889	liver development	43914	135/18670	0.000669566	0.00362976	0.0015209	GNPNAT1/PKM/TYMS	3
BP	GO:0006650	glycerophospholipid metabolic process	43945	319/18670	0.000678328	0.00363895	0.00152475	CHPT1/INPP4B/INPP5A/MBOAT1	4
BP	GO:0061008	hepaticobiliary system development	43914	138/18670	0.000713747	0.00378948	0.00158783	GNPNAT1/PKM/TYMS	3
BP	GO:0042737	drug catabolic process	43914	140/18670	0.000744211	0.00391091	0.0016387	ALDH2/MAOB/NT5E	3
BP	GO:0016999	antibiotic metabolic process	43914	151/18670	0.000926627	0.00482033	0.00201976	AKR1A1/ALDH2/MAOB	3
BP	GO:0007339	binding of sperm to zona pellucida	43885	37/18670	0.00102615	0.0052847	0.00221433	ALDOA/B4GALT1	2
BP	GO:0006066	alcohol metabolic process	43945	364/18670	0.00110892	0.0056544	0.00236924	AKR1A1/ALDH2/INPP4B/INPP5A	4
BP	GO:0006790	sulfur compound metabolic process	43945	372/18670	0.00120181	0.00606795	0.00254252	AKR1A1/B4GALT1/GSTA3/SMS	4
BP	GO:0006221	pyrimidine nucleotide biosynthetic process	43885	46/18670	0.00158349	0.00791743	0.00331747	CTPS2/TYMS	2
BP	GO:0022900	electron transport chain	43914	186/18670	0.00168793	0.00835849	0.00350228	AKR1A1/ALDH2/MAOB	3
BP	GO:0009311	oligosaccharide metabolic process	43885	48/18670	0.00172307	0.00845123	0.00354114	B4GALT1/NEU1	2
BP	GO:0046486	glycerolipid metabolic process	43945	414/18670	0.00178113	0.00865363	0.00362595	CHPT1/INPP4B/INPP5A/MBOAT1	4
BP	GO:0044272	sulfur compound biosynthetic process	43914	192/18670	0.00184819	0.00889549	0.00372729	AKR1A1/B4GALT1/GSTA3	3
BP	GO:0034656	nucleobase-containing small molecule catabolic process	43885	50/18670	0.00186831	0.00890905	0.00373297	ENTPD2/NT5E	2
BP	GO:0006213	pyrimidine nucleoside metabolic process	43885	51/18670	0.00194304	0.00918042	0.00384667	CTPS2/NT5E	2
BP	GO:0006644	phospholipid metabolic process	43945	430/18670	0.00204564	0.00957733	0.00401298	CHPT1/INPP4B/INPP5A/MBOAT1	4
BP	GO:0035036	sperm-egg recognition	43885	53/18670	0.00209672	0.00972802	0.00407612	ALDOA/B4GALT1	2
BP	GO:0006575	cellular modified amino acid metabolic process	43914	202/18670	0.0021359	0.00982132	0.00411522	GSTA3/MBOAT1/TYMS	3
BP	GO:0046164	alcohol catabolic process	43885	54/18670	0.00217566	0.0099156	0.00415472	ALDH2/INPP5A	2
BP	GO:0072528	pyrimidine-containing compound biosynthetic process	43885	56/18670	0.00233771	0.0105607	0.00442503	CTPS2/TYMS	2
BP	GO:0016051	carbohydrate biosynthetic process	43914	214/18670	0.00251621	0.0112683	0.0047215	AKR1A1/ALDOA/B4GALT1	3
BP	GO:0007584	response to nutrient	43914	219/18670	0.00268628	0.0119262	0.00499717	PKM/TYMS/LDHA	3
BP	GO:1901605	alpha-amino acid metabolic process	43914	222/18670	0.00279166	0.0122881	0.00514882	CTPS2/GMPS/SMS	3
BP	GO:0006220	pyrimidine nucleotide metabolic process	43885	62/18670	0.00285707	0.0124694	0.00522479	CTPS2/TYMS	2
BP	GO:0043647	inositol phosphate metabolic process	43885	71/18670	0.00372816	0.0161345	0.00676049	INPP4B/INPP5A	2
BP	GO:0009988	cell-cell recognition	43885	73/18670	0.00393653	0.0166173	0.0069628	ALDOA/B4GALT1	2
BP	GO:0031100	animal organ regeneration	43885	73/18670	0.00393653	0.0166173	0.0069628	PKM/TYMS	2
BP	GO:0046128	purine ribonucleoside metabolic process	43885	73/18670	0.00393653	0.0166173	0.0069628	GMPS/NT5E	2
BP	GO:0009064	glutamine family amino acid metabolic process	43885	74/18670	0.00404271	0.0169268	0.00709248	CTPS2/GMPS	2
BP	GO:0042278	purine nucleoside metabolic process	43885	76/18670	0.00425906	0.0176888	0.00741177	GMPS/NT5E	2
BP	GO:0008654	phospholipid biosynthetic process	43914	260/18670	0.00435221	0.0179311	0.00751329	CHPT1/INPP4B/MBOAT1	3
BP	GO:0046470	phosphatidylcholine metabolic process	43885	83/18670	0.00505769	0.0206723	0.00866188	CHPT1/MBOAT1	2
BP	GO:0034308	primary alcohol metabolic process	43885	85/18670	0.0052976	0.0214824	0.00900131	AKR1A1/ALDH2	2
BP	GO:0044262	cellular carbohydrate metabolic process	43914	286/18670	0.00567357	0.0228273	0.00956482	B4GALT1/HK3/INPP5A	3
BP	GO:0051289	protein homotetramerization	43885	94/18670	0.00644074	0.025713	0.010774	ALDOA/PKM	2
BP	GO:0046364	monosaccharide biosynthetic process	43885	98/18670	0.00698176	0.0276585	0.0115892	AKR1A1/ALDOA	2
BP	GO:0046677	response to antibiotic	43914	327/18670	0.0082039	0.032252	0.0135139	MAOB/TYMS/LDHA	3
BP	GO:0051260	protein homooligomerization	43914	351/18670	0.00995002	0.0388201	0.016266	ALDOA/B4GALT1/PKM	3
BP	GO:0001666	response to hypoxia	43914	359/18670	0.0105768	0.0408955	0.0171356	PKM/PTGIS/LDHA	3
BP	GO:1903409	reactive oxygen species biosynthetic process	43885	122/18670	0.0106408	0.0408955	0.0171356	MAOB/PTGIS	2
BP	GO:0019751	polyol metabolic process	43885	124/18670	0.0109768	0.0418745	0.0175458	INPP4B/INPP5A	2
BP	GO:0006520	cellular amino acid metabolic process	43914	366/18670	0.0111438	0.0419015	0.0175571	CTPS2/GMPS/SMS	3
BP	GO:0045471	response to ethanol	43885	125/18670	0.0111466	0.0419015	0.0175571	MAOB/TYMS	2
BP	GO:0036293	response to decreased oxygen levels	43914	370/18670	0.0114756	0.0428257	0.0179443	PKM/PTGIS/LDHA	3
BP	GO:0044106	cellular amine metabolic process	43885	129/18670	0.0118374	0.0438579	0.0183768	MAOB/SMS	2
BP	GO:0046683	response to organophosphorus	43885	134/18670	0.0127268	0.0444842	0.0186393	TYMS/LDHA	2
BP	GO:0001820	serotonin secretion	43854	10/18670	0.0127838	0.0444842	0.0186393	MAOB	1
BP	GO:0006171	cAMP biosynthetic process	43854	10/18670	0.0127838	0.0444842	0.0186393	ADCY9	1
BP	GO:0009157	deoxyribonucleoside monophosphate biosynthetic process	43854	10/18670	0.0127838	0.0444842	0.0186393	TYMS	1
BP	GO:0030388	fructose 1,6-bisphosphate metabolic process	43854	10/18670	0.0127838	0.0444842	0.0186393	ALDOA	1
BP	GO:0030647	aminoglycoside antibiotic metabolic process	43854	10/18670	0.0127838	0.0444842	0.0186393	AKR1A1	1
BP	GO:0035999	tetrahydrofolate interconversion	43854	10/18670	0.0127838	0.0444842	0.0186393	TYMS	1
BP	GO:0051593	response to folic acid	43854	10/18670	0.0127838	0.0444842	0.0186393	TYMS	1
BP	GO:0110096	cellular response to aldehyde	43854	10/18670	0.0127838	0.0444842	0.0186393	AKR1A1	1
BP	GO:0009308	amine metabolic process	43885	138/18670	0.0134588	0.0452348	0.0189538	MAOB/SMS	2
BP	GO:0070482	response to oxygen levels	43914	394/18670	0.0135873	0.0452348	0.0189538	PKM/PTGIS/LDHA	3
BP	GO:0005984	disaccharide metabolic process	43854	11/18670	0.0140535	0.0452348	0.0189538	B4GALT1	1
BP	GO:0006048	UDP-N-acetylglucosamine biosynthetic process	43854	11/18670	0.0140535	0.0452348	0.0189538	GNPNAT1	1
BP	GO:0009113	purine nucleobase biosynthetic process	43854	11/18670	0.0140535	0.0452348	0.0189538	GMPS	1
BP	GO:0009125	nucleoside monophosphate catabolic process	43854	11/18670	0.0140535	0.0452348	0.0189538	NT5E	1
BP	GO:0009629	response to gravity	43854	11/18670	0.0140535	0.0452348	0.0189538	PKM	1
BP	GO:0010269	response to selenium ion	43854	11/18670	0.0140535	0.0452348	0.0189538	MAOB	1
BP	GO:0014870	response to muscle inactivity	43854	11/18670	0.0140535	0.0452348	0.0189538	PKM	1
BP	GO:0019371	cyclooxygenase pathway	43854	11/18670	0.0140535	0.0452348	0.0189538	PTGIS	1
BP	GO:0019852	L-ascorbic acid metabolic process	43854	11/18670	0.0140535	0.0452348	0.0189538	AKR1A1	1
BP	GO:0046185	aldehyde catabolic process	43854	11/18670	0.0140535	0.0452348	0.0189538	AKR1A1	1
BP	GO:0051384	response to glucocorticoid	43885	146/18670	0.0149769	0.0475342	0.0199172	MAOB/TYMS	2
BP	GO:0006068	ethanol catabolic process	43854	12/18670	0.0153217	0.0475342	0.0199172	ALDH2	1
BP	GO:0006069	ethanol oxidation	43854	12/18670	0.0153217	0.0475342	0.0199172	ALDH2	1
BP	GO:0009265	2'-deoxyribonucleotide biosynthetic process	43854	12/18670	0.0153217	0.0475342	0.0199172	TYMS	1
BP	GO:0019336	phenol-containing compound catabolic process	43854	12/18670	0.0153217	0.0475342	0.0199172	MAOB	1
BP	GO:0046385	deoxyribose phosphate biosynthetic process	43854	12/18670	0.0153217	0.0475342	0.0199172	TYMS	1
BP	GO:0007338	single fertilization	43885	150/18670	0.0157625	0.0486088	0.0203675	ALDOA/B4GALT1	2
BP	GO:0042133	neurotransmitter metabolic process	43885	153/18670	0.0163632	0.0490976	0.0205723	MAOB/PTGIS	2
BP	GO:0006012	galactose metabolic process	43854	13/18670	0.0165883	0.0490976	0.0205723	B4GALT1	1
BP	GO:0006596	polyamine biosynthetic process	43854	13/18670	0.0165883	0.0490976	0.0205723	SMS	1
BP	GO:0009162	deoxyribonucleoside monophosphate metabolic process	43854	13/18670	0.0165883	0.0490976	0.0205723	TYMS	1
BP	GO:0009313	oligosaccharide catabolic process	43854	13/18670	0.0165883	0.0490976	0.0205723	NEU1	1
BP	GO:0046349	amino sugar biosynthetic process	43854	13/18670	0.0165883	0.0490976	0.0205723	GNPNAT1	1
BP	GO:0060576	intestinal epithelial cell development	43854	13/18670	0.0165883	0.0490976	0.0205723	TYMS	1
BP	GO:0048732	gland development	43914	434/18670	0.0175737	0.0494327	0.0207127	GNPNAT1/PKM/TYMS	3
BP	GO:0006241	CTP biosynthetic process	43854	14/18670	0.0178533	0.0494327	0.0207127	CTPS2	1
BP	GO:0014854	response to inactivity	43854	14/18670	0.0178533	0.0494327	0.0207127	PKM	1
BP	GO:0034356	NAD biosynthesis via nicotinamide riboside salvage pathway	43854	14/18670	0.0178533	0.0494327	0.0207127	PTGIS	1
BP	GO:0035358	regulation of peroxisome proliferator activated receptor signaling pathway	43854	14/18670	0.0178533	0.0494327	0.0207127	PTGIS	1
BP	GO:0036092	phosphatidylinositol-3-phosphate biosynthetic process	43854	14/18670	0.0178533	0.0494327	0.0207127	INPP4B	1
BP	GO:0046036	CTP metabolic process	43854	14/18670	0.0178533	0.0494327	0.0207127	CTPS2	1
BP	GO:0046037	GMP metabolic process	43854	14/18670	0.0178533	0.0494327	0.0207127	GMPS	1
BP	GO:0046479	glycosphingolipid catabolic process	43854	14/18670	0.0178533	0.0494327	0.0207127	NEU1	1
BP	GO:0046855	inositol phosphate dephosphorylation	43854	14/18670	0.0178533	0.0494327	0.0207127	INPP5A	1
BP	GO:0046940	nucleoside monophosphate phosphorylation	43854	14/18670	0.0178533	0.0494327	0.0207127	AK2	1
BP	GO:1901070	guanosine-containing compound biosynthetic process	43854	14/18670	0.0178533	0.0494327	0.0207127	GMPS	1
CC	GO:1904813	ficolin-1-rich granule lumen	43914	124/19717	0.000446143	0.0116402	0.0104241	ALDOA/HK3/PKM	3
CC	GO:0034774	secretory granule lumen	43945	321/19717	0.000566363	0.0116402	0.0104241	ALDOA/HK3/NEU1/PKM	4
CC	GO:0060205	cytoplasmic vesicle lumen	43945	338/19717	0.000687298	0.0116402	0.0104241	ALDOA/HK3/NEU1/PKM	4
CC	GO:0031983	vesicle lumen	43945	339/19717	0.000694938	0.0116402	0.0104241	ALDOA/HK3/NEU1/PKM	4
CC	GO:0101002	ficolin-1-rich granule	43914	185/19717	0.00142266	0.0190636	0.0170719	ALDOA/HK3/PKM	3
MF	GO:0048029	monosaccharide binding	43914	75/17697	0.000138794	0.012075	0.00511345	ALDOA/GNPNAT1/HK3	3
MF	GO:0009055	electron transfer activity	43914	114/17697	0.000477411	0.0207674	0.00879441	AKR1A1/ALDH2/MAOB	3
MF	GO:0016879	ligase activity, forming carbon-nitrogen bonds	43885	44/17697	0.00161046	0.0467033	0.0197776	CTPS2/GMPS	2
MF	GO:0051287	NAD binding	43885	56/17697	0.0025958	0.048401	0.0204965	ALDH2/LDHA	2
MF	GO:0016765	transferase activity, transferring alkyl or aryl (other than methyl) groups	43885	58/17697	0.00278167	0.048401	0.0204965	GSTA3/SMS	2
